# Supplementary material for: Early Coagulation Disorder Is Associated With an Increased Risk of Atrial Fibrillation in Septic Patients
Source: Front Cardiovasc Med. 2021 Sep 30;8:724942. doi: 10.3389/fcvm.2021.724942 (PMC8514978; doi:10.3389/fcvm.2021.724942)
Supplement: Supplementary file 2 [file Table_2.xlsx]

## Sheet: ageselectnocsru
subject_id	Atrial_fibrillation(0=no, 1=yes)	sepsis	atrial_flutter	paroxysmal_supraventricular_tachycardia	ventricular_fibrillation	ventricular_flutter	ventricular_tachycardia	acute_heart_failure	septic_myocarditis	acute_myocarditis	acute_pericarditis	stroke	tia	dic	Ethnicity(1=Asian,2=blank,3=Hispanic,4=white, 5=other)	Gender(female=1,male=2)	age	insurance(1=Government,2=Medicaid,3=Medicare,4=Private,5=Self-pay)	Marital_status(1=Divorced,2=Married,3=Other,4=Single)	hospstay_seq	icustay_seq	unittype	hospital_expire_flag	icustay_expire_flag	los_icu	los_hospital	expire_flag	elixhauser_comorbidity_score	qsofa	Sofa	sirs	apsiii	sapsii	oasis	gcs	urineoutput	heartrate_min	heartrate_max	heartrate_mean	sysbp_min	sysbp_max	sysbp_mean	diasbp_min	diasbp_max	diasbp_mean	meanbp_min	meanbp_max	meanbp_mean	resprate_min
4	0	0	0	0	0	0	0	0	0	0	0	0	0	0	4	1	48	4	4	1	1	3	0	0	1.6785	7.759	0	22	1	4	2	31	35	26	15	2150	74	111	89	97	139	118	55	81	69	69	100	85	18
9	0	0	0	0	0	0	0	1	0	0	0	0	0	0	5	2	42	2	#NULL!	1	1	3	1	1	5.3231	4.8813	1	12	1	5	3	29	31	35	15	887	82	111	93	106	217	159	53	107	80	67	132	99	14
19	0	0	0	0	0	0	0	0	0	0	0	0	0	0	4	2	30	3	#NULL!	1	1	2	0	0	1.3017	5.7944	1	2	1	2	2	33	28	32	14	940	76	114	99	118	163	146	44	98	62	75	116	90	16
31	0	0	0	0	0	0	0	0	0	0	0	0	1	0	4	2	72	3	2	1	1	3	1	1	7.9379	7.6479	1	9	1	2	0	19	44	29	15	3345	48	54	51	85	146	114	48	74	60	63	99	80	12
37	0	0	0	0	0	0	0	1	0	0	0	0	0	0	4	2	69	3	2	1	1	3	0	0	1.1397	5.0875	1	15	1	2	4	30	31	21	13	2730	69	91	81	103	144	123	33	60	48	65	82	73	15
41	0	0	0	0	0	0	0	0	0	0	0	0	0	0	4	2	57	4	4	1	1	1	0	0	3.3937	27.2188	1	3	1	3	4	34	21	23	15	2305	73	114	92	98	153	127	49	79	64	81	100	94	11
43	0	0	0	0	0	0	0	0	0	0	0	0	0	0	4	2	33	4	2	1	1	2	0	0	4.6252	9.7813	0	0	1	2	4	25	6	18	15	3370	78	105	88	120	148	136	57	78	70	78	101	92	16
52	0	0	0	0	0	0	0	0	0	0	0	0	0	0	4	2	38	4	4	1	1	3	0	0	1.8504	9.5819	1	17	1	7	3	52	24	26	15	840	87	106	95	90	148	104	36	83	55	48	88	66	11
61	0	0	0	0	0	0	0	0	0	0	0	0	0	0	4	2	55	4	2	1	1	3	0	0	2.5591	32.9097	1	9	1	4	4	44	28	27	15	1150	73	116	94	81	116	94	40	64	48	55	79	63	17
64	0	1	0	0	0	0	0	0	0	0	0	0	0	0	2	1	27	2	4	1	1	3	0	0	2.325	15.15	0	-7	1	7	4	41	12	22	14	5695	88	113	100	104	118	111	41	72	61	64	87	78	16
80	0	0	0	0	0	0	0	0	0	0	0	0	0	0	4	2	44	5	2	1	1	2	0	0	1.1901	4.9868	0	0	1	2	3	25	23	23	13	1450	61	92	69	109	147	128	37	77	62	66	98	84	13
85	1	1	0	0	0	0	0	0	0	0	0	0	0	0	4	2	77	3	2	2	1	3	0	0	1.9909	4.8576	1	12	1	5	2	47	34	35	15	1650	79	136	103	73	166	103	42	101	58	49	106	68	20
105	1	1	0	0	0	0	0	0	0	0	0	0	0	0	2	1	35	3	4	1	1	3	0	0	4.9968	4.9882	1	23	2	6	2	57	36	30	9	747	52	79	62	87	102	93	52	72	59	61	78	67	11
109	0	0	0	0	0	0	0	0	0	0	0	0	0	0	2	1	24	2	4	11	1	3	0	0	0.9832	2.9347	1	20	1	7	4	47	34	41	14	450	75	95	87	92	212	161	52	141	102	61	159	117	13
112	0	1	0	0	0	0	0	0	0	0	0	0	0	0	4	2	30	3	2	2	1	3	1	1	1.1392	1.2458	1	19	1	10	4	82	85	47	15	439	59	129	101	23	116	96	19	60	52	16	78	68	13
113	0	0	0	0	0	0	0	0	0	0	0	0	0	0	4	2	36	4	2	1	1	2	0	0	0.7879	14.8639	0	0	1	2	1	24	15	26	14	1065	66	102	82	98	139	122	43	78	61	63	96	81	10
124	0	0	0	0	0	0	0	0	0	0	0	0	0	0	4	2	70	4	2	1	1	1	0	0	3.9119	20.7396	1	3	1	2	1	29	20	19	15	2885	60	84	71	123	183	153	36	105	53	64	126	83	11
129	0	0	0	0	0	0	0	0	0	0	0	0	0	0	3	2	37	1	2	1	1	1	0	0	1.3796	9.2181	0	6	1	4	3	36	30	37	7	4175	65	101	79	99	146	116	42	88	62	64	104	81	11
143	0	0	0	0	0	0	0	0	0	0	0	0	0	0	4	2	51	3	4	1	1	1	0	0	2.7712	15.7222	0	11	1	6	3	54	25	32	15	3865	58	125	82	145	181	164	70	96	81	94	121	108	16
145	0	1	0	0	0	0	0	0	0	0	0	0	0	0	4	1	56	2	4	2	1	3	0	0	2.036	6.841	0	10	1	7	4	50	26	26	15	4570	56	115	83	73	168	122	24	79	49	40	90	73	11
148	1	0	0	0	0	0	0	1	0	0	0	0	0	0	5	1	78	3	#NULL!	1	1	3	0	0	15.2614	32.9424	1	12	1	5	4	60	48	46	15	1945	80	179	113	69	131	100	28	77	52	50	95	68	30
157	0	0	0	0	0	0	0	0	0	0	0	0	0	0	4	2	80	3	4	1	1	2	0	0	2.0621	9.2194	1	16	2	2	2	36	36	30	13	1620	47	82	70	77	159	128	44	73	61	55	100	83	12
174	0	0	0	0	0	0	0	0	0	0	0	0	0	0	4	1	25	3	4	1	1	3	1	1	7.1397	7.1104	1	-1	1	7	3	55	31	40	13	3608	61	129	85	107	145	124	25	84	62	59	106	84	13
177	1	0	0	0	0	0	0	0	0	0	0	0	0	0	4	2	77	3	2	1	1	1	0	0	3.1941	11.6799	1	16	1	2	2	47	38	22	15	2150	84	112	97	87	150	116	25	56	39	53	87	64	14
184	0	0	0	0	0	0	0	0	0	0	0	0	0	0	4	2	56	4	2	1	1	3	0	0	1.1139	2.8646	1	0	1	2	2	34	21	26	14	2040	63	80	71	91	117	103	40	69	54	57	85	70	12
186	0	0	0	0	0	0	0	0	0	0	0	0	0	0	4	1	76	3	2	1	1	3	0	0	3.7078	5.8382	1	22	1	2	4	46	46	37	15	2060	90	123	104	94	135	109	32	81	50	56	93	70	16
188	0	0	0	0	0	0	0	0	0	0	0	0	0	0	4	2	52	4	2	1	1	1	0	0	1.9476	7.9181	1	15	1	4	1	31	23	30	15	2540	64	84	75	117	196	155	54	91	71	74	129	101	12
191	0	0	0	0	0	0	0	1	0	0	0	0	0	0	1	2	69	3	2	1	1	3	0	0	4.2111	11.0597	0	5	1	4	4	54	40	34	15	5505	60	112	67	91	146	120	51	93	68	61	109	85	9
202	0	1	0	0	0	0	0	0	0	0	0	0	0	0	4	1	76	3	2	1	1	3	0	0	1.6262	2.5514	0	5	1	4	3	39	42	23	15	1548	77	90	83	98	121	112	41	61	49	60	80	70	14
221	0	0	0	0	0	0	0	0	0	0	0	0	0	0	5	2	33	4	#NULL!	1	1	2	0	0	11.4925	19.241	0	0	1	5	4	43	37	39	15	5785	79	129	101	65	136	106	31	81	59	51	102	73	12
224	0	0	0	0	0	0	0	0	0	0	0	0	0	0	4	2	70	3	2	1	1	3	0	0	1.1046	1.1035	1	0	1	6	2	16	23	23	14	6105	55	78	62	127	164	149	50	77	60	69	87	80	16
226	0	0	0	0	0	0	0	0	0	0	0	0	0	0	3	1	27	2	3	1	1	1	0	0	2.1064	4.9743	0	14	1	5	3	37	18	28	15	2750	74	116	92	72	136	101	23	83	59	47	91	68	16
231	0	0	0	0	0	0	0	0	0	0	0	0	0	0	4	2	39	2	4	2	1	3	0	0	1.5998	2.8882	0	11	1	6	3	58	31	40	14	2530	70	108	88	90	133	105	39	72	56	58	93	73	17
236	0	0	0	0	0	0	0	0	0	0	0	0	0	0	5	2	53	4	2	1	1	1	0	0	3.2287	11.6118	1	4	1	8	4	29	34	25	15	1770	63	92	75	93	189	136	35	85	61	58	143	90	8
243	0	0	0	0	0	0	0	0	0	0	0	0	0	0	2	2	43	3	4	1	1	1	0	0	2.3136	9.2014	0	0	1	5	2	49	46	18	15	2743	76	99	89	128	179	159	60	84	72	80	135	99	16
249	1	0	0	0	0	0	0	0	0	0	0	0	0	0	4	1	75	3	1	1	1	2	0	0	5.7262	13.7597	0	12	1	2	4	59	45	34	15	979	75	113	95	81	144	112	33	72	54	51	95	74	16
250	0	1	0	0	0	0	0	0	0	0	0	0	0	0	2	1	24	5	4	1	1	3	1	1	10.6659	10.1097	1	12	1	8	4	71	52	43	15	1144	113	151	132	68	171	108	50	122	71	55	138	84	17
252	0	0	0	0	0	0	0	0	0	0	0	0	0	0	4	2	55	4	4	1	1	3	0	0	10.6859	23.4417	0	31	1	12	4	80	49	45	15	1258	87	132	109	83	134	106	47	94	63	59	146	78	12
266	0	0	0	0	0	0	0	1	0	0	0	0	0	0	2	1	78	3	#NULL!	1	1	2	0	0	1.4016	4.2097	0	18	1	2	3	32	34	34	13	2860	70	101	84	106	169	137	53	98	76	65	113	91	16
267	0	0	0	0	0	0	0	0	0	0	0	0	0	0	1	1	25	4	2	1	1	1	0	0	4.4341	11.3653	0	16	1	3	4	33	19	40	14	2635	112	147	130	114	163	138	49	90	74	74	110	93	14
269	0	1	0	0	0	0	0	0	0	0	0	0	0	0	4	2	40	2	4	1	1	3	0	0	3.2788	22.2889	0	4	1	4	4	42	22	31	15	3850	99	147	123	83	117	101	32	67	49	50	82	66	12
279	0	0	0	0	0	0	0	0	0	0	0	0	0	0	4	2	74	3	2	1	1	3	0	0	4.0658	5.9139	1	16	1	17	3	88	69	35	14	37	62	96	83	66	123	98	22	60	33	41	74	55	10
282	0	0	0	0	0	0	0	0	0	0	0	0	0	0	4	1	74	3	#NULL!	1	1	2	0	0	0.8519	7.0299	1	8	1	6	4	35	36	26	14	913	74	104	89	84	130	111	38	96	58	64	108	78	14
285	0	0	0	0	0	0	0	0	0	0	0	0	0	0	3	2	45	4	2	1	1	2	0	0	28.688	28.6889	0	11	1	7	4	40	39	37	15	760	70	96	84	51	164	96	20	82	48	42	125	69	13
287	0	0	0	0	0	0	0	0	0	0	0	0	0	0	4	2	70	3	2	2	1	1	0	0	3.183	6.0333	1	12	2	6	4	37	49	47	7	1153	67	100	79	96	167	127	45	75	58	62	107	81	12
292	0	0	0	0	0	0	0	0	0	0	0	0	0	0	5	1	57	4	2	1	1	3	1	1	0.8854	0.8861	1	22	1	11	4	110	76	48	15	695	20	110	89	43	124	83	20	83	45	30	101	59	24
303	0	0	0	0	0	0	0	0	0	0	0	0	0	0	4	2	21	4	4	2	1	1	0	0	2.7756	5.9035	0	10	1	5	3	57	16	24	14	1575	110	143	124	117	151	137	44	85	61	72	104	86	8
314	0	0	0	0	0	0	0	0	0	0	0	0	0	0	2	1	40	2	4	1	1	3	0	0	4.8358	6.5549	0	12	1	2	4	64	43	33	15	4800	68	140	108	84	122	102	26	81	51	45	95	68	17
321	1	0	0	0	0	0	0	0	0	0	0	0	0	0	5	1	76	3	#NULL!	2	1	3	0	0	1.8421	4.3681	0	-2	1	5	2	53	29	18	9	2040	82	118	98	113	157	138	47	83	66	70	103	90	13
338	1	0	0	0	0	0	0	0	0	0	0	0	0	0	4	2	76	3	2	1	1	3	0	0	1.1439	7.6938	0	8	1	2	2	19	24	17	15	2096	64	98	81	101	134	120	51	84	64	71	99	83	10
339	0	0	0	0	0	0	0	1	0	0	0	0	0	0	2	1	67	2	4	1	1	3	0	0	31.7018	59.5903	0	17	2	4	4	69	45	51	13	825	95	142	124	85	157	134	44	99	69	58	116	90	14
353	0	1	0	0	0	0	0	0	0	0	0	0	0	0	4	2	62	3	4	2	1	3	0	0	0.9663	16.0063	1	7	1	6	4	69	45	33	15	362	62	94	76	87	153	117	37	87	58	54	109	78	13
357	0	1	0	0	0	0	0	1	0	0	0	0	0	0	4	2	64	4	2	3	1	3	0	0	10.0611	12.6556	1	39	1	4	3	66	38	30	15	1225	74	86	79	83	118	102	41	89	54	50	96	66	16
366	0	1	0	0	0	0	0	0	0	0	0	0	0	0	3	2	52	3	4	1	1	3	0	0	2.1721	3.7854	0	21	2	4	4	66	33	40	11	1001	116	145	130	81	125	100	35	69	51	49	75	61	18
367	1	0	0	0	0	0	0	0	0	0	0	0	0	0	4	1	60	4	4	1	1	1	0	0	2.4403	6.1132	0	6	1	4	2	53	35	32	14	682	69	103	83	81	139	104	23	79	39	42	90	61	13
384	0	0	0	0	0	0	0	0	0	0	0	0	0	0	4	1	70	3	#NULL!	3	1	3	0	0	1.6816	6.9361	1	16	2	8	3	60	69	38	8	30	67	93	81	69	220	146	43	119	79	49	159	97	9
393	0	0	0	0	0	0	0	0	0	0	0	0	0	0	4	2	61	3	4	1	1	2	0	0	0.7338	4.4319	1	15	2	5	2	34	45	32	13	690	64	97	79	88	107	99	30	68	54	51	83	71	17
406	0	1	0	0	0	0	0	0	0	0	0	0	0	0	4	1	62	2	2	1	1	3	0	0	2.8352	6.8076	0	0	1	5	1	48	25	34	14	8615	69	83	74	70	133	111	20	75	42	37	90	65	11
408	0	0	0	0	0	0	0	1	0	0	0	0	0	0	4	2	79	3	2	1	1	2	1	0	2.9356	75.9542	1	10	1	5	4	71	50	39	15	2110	78	148	102	86	130	103	40	68	51	57	88	68	21
416	0	0	0	0	0	0	0	0	0	0	0	0	0	0	2	1	56	2	2	1	1	3	0	0	16.0947	19.1063	1	0	1	8	4	67	42	46	13	280	61	102	78	97	164	124	49	88	65	65	118	82	5
417	0	0	0	0	0	0	0	0	0	0	0	0	0	0	4	1	50	4	2	1	1	1	1	1	1.3413	0.3722	1	0	1	8	3	77	57	44	3	3390	83	109	96	55	122	101	17	72	57	37	92	73	10
419	0	0	0	0	0	0	0	1	0	0	0	0	0	0	5	1	59	4	4	1	1	3	0	0	1.2316	8.7014	1	12	1	4	4	44	28	26	15	2650	72	106	87	91	138	114	45	82	66	57	95	77	19
421	0	0	0	0	0	0	0	0	0	0	0	0	0	0	3	2	52	1	1	1	1	1	0	0	7.4311	9.6958	0	6	1	5	4	44	44	33	15	3340	85	111	94	85	136	100	39	76	55	13	93	70	13
430	0	1	0	0	0	0	0	1	0	0	0	0	0	0	4	1	78	3	#NULL!	1	1	3	1	1	0.5341	0.4278	1	7	1	9	3	113	69	52	15	4	71	77	73	66	151	107	22	74	53	40	94	71	24
433	0	1	0	0	0	0	0	1	0	0	0	0	0	0	2	1	51	2	2	2	1	3	0	0	7.9698	20.1674	1	11	1	8	1	47	47	38	15	0	75	93	82	97	179	117	21	43	34	52	77	62	16
434	0	0	0	0	0	0	0	0	0	0	0	0	0	0	4	2	77	3	2	1	1	3	0	0	6.4895	16.3972	1	10	1	12	3	61	61	37	15	4820	93	142	110	84	167	113	48	78	63	62	109	81	10
441	0	1	0	0	0	0	0	0	0	0	0	0	0	1	4	1	41	4	3	1	1	3	0	0	81.1664	81.0056	0	14	1	5	3	66	36	32	15	765	96	117	106	96	122	109	39	71	54	61	80	72	24
450	1	1	0	0	0	0	0	0	0	0	0	0	0	0	3	1	80	3	2	1	1	3	0	0	0.6793	17.9083	1	10	2	4	4	58	48	33	10	1250	92	111	99	97	148	136	47	85	64	64	102	88	13
452	0	0	0	0	0	0	0	1	0	0	0	0	0	0	4	2	61	4	2	1	1	1	0	0	4.068	17.6632	0	24	1	7	4	50	55	32	15	756	69	98	79	89	131	108	51	74	61	66	96	78	12
457	1	1	0	0	0	0	0	1	0	0	0	0	0	0	4	2	54	4	2	1	1	3	0	0	23.5759	29.9417	0	18	2	9	4	84	43	44	9	1875	93	121	103	100	131	112	20	39	27	49	64	56	13
458	0	0	0	0	0	0	0	0	0	0	0	0	0	0	4	2	50	2	2	1	1	2	0	0	1.9651	3.7917	0	6	1	4	2	14	23	21	14	2010	84	88	87	92	99	97	50	59	55	64	72	69	19
468	0	0	0	0	0	0	0	0	0	0	0	0	0	0	4	2	51	4	2	1	1	1	0	0	3.1866	17.209	0	19	2	12	4	65	38	39	11	3539	72	105	83	97	138	120	54	84	67	71	102	84	10
477	1	0	0	0	0	0	0	0	0	0	0	0	0	0	4	2	72	3	2	1	1	3	0	0	3.2451	7.9854	1	10	1	3	3	34	34	27	14	2267	87	107	98	104	158	129	55	83	69	72	108	89	18
480	0	0	0	0	0	0	0	0	0	0	0	0	0	0	4	2	49	4	4	1	1	1	0	0	2.6125	11.1743	0	17	1	5	1	49	32	29	15	1165	57	81	66	108	135	125	53	76	67	73	261	95	10
492	0	0	0	0	0	0	0	0	0	0	0	0	0	0	4	2	40	4	2	1	1	3	0	0	3.5921	3.5931	0	7	1	4	3	21	24	35	14	2445	72	117	90	97	121	111	52	79	63	63	89	74	7
503	0	0	0	0	0	0	0	1	0	0	0	0	0	0	5	1	71	3	4	1	1	3	0	0	2.9615	11.6472	1	7	1	3	4	44	32	33	10	1430	75	123	106	106	182	151	55	105	71	76	121	90	17
505	0	0	0	0	0	0	0	1	0	0	0	0	0	0	4	2	57	4	2	2	1	3	1	1	5.9708	5.8813	1	24	1	3	3	52	30	29	15	1700	97	112	104	86	129	104	46	70	57	57	82	67	14
509	0	0	0	0	0	0	0	0	0	0	0	0	0	0	4	1	71	3	2	1	1	3	0	0	2.5925	13.5368	1	11	2	5	4	58	44	29	11	1930	80	116	91	60	172	116	37	106	74	45	128	88	13
514	0	0	0	0	0	0	0	0	0	0	0	0	0	0	4	1	55	2	4	1	1	3	0	0	1.0405	3.3285	1	11	1	2	3	30	18	26	14	3750	92	112	99	90	130	104	49	75	60	61	76	69	8
558	0	0	0	0	0	0	0	0	0	0	0	0	0	0	4	2	50	4	2	1	1	3	0	0	1.4902	3.6292	0	0	1	2	3	27	13	20	15	2710	78	93	86	102	130	115	47	79	61	57	91	73	15
561	0	0	0	0	0	0	0	0	0	0	0	0	0	0	5	2	64	3	#NULL!	1	1	2	1	1	3.0832	3.0375	1	0	1	3	3	22	30	36	15	1970	82	99	92	103	163	133	56	100	74	73	121	94	15
577	0	0	0	0	0	0	0	0	0	0	0	0	0	0	4	2	43	1	4	1	1	1	0	0	2.6706	10.5417	0	0	1	3	4	20	21	38	15	2920	81	107	97	100	188	145	45	102	73	60	126	94	12
587	0	1	0	0	0	0	0	1	0	0	0	0	0	0	4	2	57	4	2	1	1	3	0	0	2.0682	36.0292	0	18	1	9	4	61	44	28	14	3575	96	117	103	79	154	117	45	74	59	62	96	78	8
588	1	1	0	0	0	0	1	1	0	0	0	0	0	0	2	2	69	3	#NULL!	1	1	3	0	0	7.2556	20.7889	1	23	1	8	2	68	44	36	14	309	77	94	83	81	120	100	44	64	53	53	84	69	6
594	0	0	0	0	0	0	0	0	0	0	0	0	0	0	5	1	80	4	2	1	1	2	0	0	18.7182	18.6986	1	5	1	9	4	73	62	50	15	1630	54	125	104	49	202	117	18	76	47	31	135	70	1
634	0	0	0	0	0	0	0	0	0	0	0	0	0	0	5	2	63	4	2	1	1	1	0	0	3.9028	9.3542	1	8	1	10	4	72	43	39	15	363	73	116	90	80	179	116	36	86	53	47	116	72	10
652	0	1	0	0	0	0	0	0	0	0	0	0	0	1	2	2	22	2	1	1	1	3	0	0	23.7994	44.4583	0	23	1	14	3	87	54	44	15	325	126	158	144	91	153	118	47	77	58	66	87	77	27
665	0	0	0	0	0	0	0	1	0	0	0	0	0	0	2	2	67	2	4	3	1	3	0	0	10.7055	52.8799	1	15	1	3	3	32	30	27	15	3635	73	99	88	98	171	132	51	82	68	61	100	83	15
671	0	0	0	0	0	0	0	0	0	0	0	0	0	0	4	2	48	3	4	1	1	2	0	0	7.5349	11.5424	0	9	1	2	4	35	35	24	14	2855	47	103	69	94	130	110	30	73	53	46	85	66	9
689	0	0	0	0	0	0	0	1	0	0	0	0	0	0	2	1	51	3	#NULL!	1	1	3	0	0	9.7531	45.8569	0	24	1	6	3	38	35	31	15	855	83	105	91	104	168	141	54	96	75	73	115	92	14
697	0	0	0	0	0	0	0	0	0	0	0	0	0	0	4	2	27	4	4	1	1	2	0	0	2.2348	11.1854	0	-2	1	3	3	38	21	30	15	3480	87	135	110	84	135	112	35	64	56	49	83	72	8
705	0	0	0	0	0	0	0	0	0	0	0	0	0	0	1	2	69	3	#NULL!	1	1	3	1	1	3.5682	3.4701	1	12	1	6	3	71	63	42	15	826	76	86	81	62	114	96	27	64	46	39	77	62	18
715	0	0	0	0	0	0	0	0	0	0	0	0	0	0	4	1	44	3	4	1	1	3	0	0	1.4387	3.6889	0	11	1	2	3	32	20	18	14	4300	60	74	67	91	142	111	52	84	63	63	93	74	10
720	0	0	0	0	0	0	0	1	0	0	0	0	0	0	4	1	51	3	2	1	1	3	0	0	48.9253	51.6396	0	28	1	9	3	65	32	39	15	1145	77	102	88	82	123	99	43	63	53	56	81	68	13
732	1	0	0	0	0	0	0	1	0	0	0	0	0	0	4	1	66	3	4	1	1	1	0	0	0.1394	24.9319	1	22	1	5	3	56	42	31	#NULL!	150	63	63	63	90	90	90	29	29	29	51	51	51	23
745	0	0	0	0	0	0	0	0	0	0	0	0	0	0	4	2	60	3	#NULL!	2	1	1	0	0	31.6991	41.8139	1	0	1	6	2	43	38	28	13	1410	74	87	81	130	176	160	45	81	62	83	110	95	15
750	0	0	0	0	0	0	0	0	0	0	0	0	0	0	4	1	36	4	4	1	1	1	0	0	7.5533	8.6951	0	13	1	7	3	54	29	25	15	827	102	123	111	104	130	118	46	72	59	66	91	78	20
751	0	0	0	0	0	0	0	0	0	0	0	0	0	0	4	2	55	3	1	1	1	3	0	0	7.1434	12.8347	1	12	1	11	4	72	46	37	15	3314	61	97	78	73	179	104	39	97	53	48	120	65	12
757	0	0	0	0	0	0	0	0	0	0	0	0	0	0	4	1	45	3	4	2	1	3	0	0	2.5338	4.625	1	6	1	3	4	58	29	44	10	7055	99	140	116	106	142	126	44	81	61	70	101	83	18
768	1	0	0	0	0	0	0	1	0	0	0	0	0	0	5	1	66	3	2	1	1	3	0	0	2.9181	9.8229	1	19	1	2	4	36	26	38	15	806	70	107	90	102	207	135	45	109	67	71	291	91	9
771	0	0	0	0	0	0	0	1	0	0	0	0	0	0	4	2	70	3	2	1	1	3	0	0	1.7411	10.9424	1	10	1	3	3	51	41	35	14	532	61	100	79	90	145	121	35	74	51	53	96	74	18
773	1	0	0	0	0	0	0	1	0	0	0	0	0	0	4	2	58	4	4	2	1	3	0	0	2.6595	3.6306	1	23	1	4	3	46	38	29	15	1350	75	97	86	92	119	107	35	68	54	50	76	67	16
788	0	1	0	0	0	0	0	0	0	0	0	0	0	0	4	1	71	3	#NULL!	1	1	3	0	0	2.09	4.7375	0	0	1	2	3	28	21	23	15	2620	82	98	92	109	147	126	30	56	45	57	82	72	18
793	0	0	0	0	0	0	0	0	0	0	0	0	0	0	4	1	79	3	2	1	1	3	0	0	3.2874	3.8035	1	6	1	3	3	46	41	53	15	525	66	121	92	89	151	127	31	77	56	50	102	80	9
797	0	1	0	0	0	0	0	0	0	0	0	0	0	0	4	2	43	3	4	1	1	3	0	0	1.8133	4.6979	1	19	1	9	4	70	57	23	15	2255	81	111	93	95	156	126	48	112	83	64	123	97	19
799	0	0	0	0	0	0	0	0	0	0	0	0	0	0	4	1	59	4	2	1	1	1	0	0	3.6491	15.6438	0	3	1	6	4	52	39	38	15	3630	89	127	106	95	173	117	45	77	56	61	110	77	10
819	0	1	0	0	0	0	0	1	0	0	0	0	0	0	2	2	72	3	#NULL!	1	1	3	1	0	1.635	2.2986	1	24	2	11	4	70	64	45	11	280	92	131	119	94	124	108	50	70	56	64	76	70	20
852	0	0	0	0	0	0	0	0	0	0	0	0	0	0	4	2	47	4	2	1	1	3	0	0	1.6638	4.2451	0	-4	1	3	3	26	26	37	15	1350	98	127	111	114	173	136	59	88	73	82	114	93	12
878	1	0	1	0	0	0	0	1	0	0	0	0	0	0	2	1	75	3	2	2	1	3	0	0	1.0707	5.6583	1	16	1	2	4	47	31	43	15	600	80	112	84	103	130	114	43	99	57	58	150	72	17
894	0	0	0	0	0	0	0	1	0	0	0	0	0	0	5	2	77	3	2	2	1	3	0	0	2.1741	24.7049	1	0	2	9	3	62	49	31	12	3875	72	114	83	68	145	99	30	115	54	43	125	68	12
897	0	1	0	0	0	0	0	0	0	0	0	0	0	0	4	1	40	4	4	1	1	3	0	0	6.5938	9.4472	0	2	1	8	3	49	17	32	14	2156	90	113	99	79	121	95	44	83	64	57	149	78	23
899	0	1	0	0	0	0	0	1	0	0	0	0	0	0	4	2	71	3	4	1	1	3	0	0	2.954	6.8063	1	13	1	2	4	45	32	24	15	2050	79	102	89	88	127	105	39	63	52	57	84	70	25
905	0	0	0	0	0	0	0	0	0	0	0	0	0	0	4	2	61	4	2	1	1	3	1	1	2.2328	12.9472	1	5	1	16	3	80	63	44	15	325	112	162	125	75	180	100	50	85	62	60	272	80	18
914	0	0	0	0	0	0	0	0	0	0	0	0	0	0	4	2	50	3	4	2	1	3	0	0	7.1297	15.1361	1	0	1	2	3	36	24	28	15	2748	106	128	120	94	121	106	51	85	61	64	97	75	20
929	0	0	0	0	0	0	0	0	0	0	0	0	0	0	4	2	55	4	2	1	1	2	0	0	3.2582	7.1785	0	0	1	6	4	49	30	25	15	2835	80	113	97	73	138	104	35	80	59	48	94	73	10
940	0	1	0	0	0	0	0	1	0	0	0	0	0	0	2	1	63	3	2	1	1	3	1	0	1.8819	5.8597	1	33	1	7	3	70	52	29	15	1360	64	76	69	79	116	97	38	72	53	54	83	67	14
945	0	1	0	0	0	0	0	0	0	0	0	0	0	0	4	1	61	4	2	1	1	3	0	0	2.2924	7.8847	1	9	1	2	4	54	42	31	15	4106	83	124	100	79	117	95	31	60	52	47	79	66	18
946	1	0	0	0	0	0	0	1	0	0	0	0	0	0	5	2	80	3	2	1	1	1	0	0	31.5911	31.8375	1	30	1	6	2	39	40	38	15	1062	73	89	81	90	125	107	47	65	56	61	84	72	15
948	0	0	0	0	0	0	0	0	0	0	0	0	0	0	4	1	39	4	2	3	1	3	0	0	1.1646	2.8938	0	10	1	5	4	56	26	22	15	3420	78	110	90	95	122	107	45	81	61	58	90	71	12
952	0	0	0	0	0	0	0	0	0	0	0	0	0	0	2	2	62	3	#NULL!	2	1	3	0	0	1.1751	6.0167	1	7	1	2	4	26	32	36	14	1850	77	105	92	85	169	101	56	101	67	66	124	79	9
959	0	0	0	0	0	0	0	0	0	0	0	0	0	0	4	1	56	4	3	1	1	2	0	0	15.118	35.3799	1	15	1	5	4	51	37	34	15	2149	104	137	119	75	125	94	41	65	51	52	200	69	14
961	0	0	0	0	0	0	0	0	0	0	0	0	0	0	5	2	48	1	4	1	1	3	0	0	11.6041	11.5965	0	-4	1	4	3	41	28	33	15	3330	67	115	87	101	211	132	55	180	83	73	185	101	18
980	0	0	0	0	0	0	0	0	0	0	0	0	0	0	4	1	71	4	2	1	1	2	0	0	3.0706	6.6431	0	5	1	2	2	43	32	29	14	1120	93	134	108	104	159	133	50	73	60	72	107	85	13
984	0	1	0	0	0	0	0	1	0	0	0	0	0	0	4	2	69	3	#NULL!	1	1	3	0	0	1.7649	14.6917	1	30	1	5	3	57	41	32	15	525	71	83	78	100	137	121	54	74	64	71	95	83	9
989	0	0	0	0	0	0	0	0	0	0	0	0	0	0	4	2	71	4	2	1	1	2	0	0	6.2804	9.8576	1	16	1	7	3	57	43	27	15	1210	93	111	103	78	132	106	39	66	55	58	203	76	16
1004	0	0	0	0	0	0	0	0	0	0	0	0	0	0	4	1	56	4	2	1	1	1	0	0	6.0411	15.3333	1	0	1	4	4	39	30	27	15	4500	51	118	78	84	265	131	46	249	73	1	246	93	14
1006	0	0	0	0	0	0	0	1	0	0	0	0	0	0	4	2	74	3	2	2	1	3	0	0	8.5752	28.2965	1	13	1	5	3	50	34	38	15	1136	65	81	71	79	143	115	41	66	51	58	91	71	9
1018	0	0	0	0	0	0	0	0	0	0	0	0	0	0	2	1	72	3	1	2	1	2	0	0	2.0235	4.2056	0	7	1	3	2	53	36	23	15	817	62	77	68	100	229	135	37	86	50	52	110	71	12
1030	0	0	0	0	0	0	0	1	0	0	0	0	0	0	2	2	77	3	#NULL!	1	1	1	0	0	3.4296	8.4042	0	7	1	7	3	38	35	36	11	1791	55	99	79	110	158	131	50	72	61	70	103	85	10
1033	0	0	0	0	0	0	0	0	0	0	0	0	0	0	4	2	79	3	#NULL!	1	1	1	0	0	2.1701	9.1986	1	6	1	2	2	47	33	39	15	1072	41	81	56	113	172	138	49	77	59	68	123	83	9
1038	1	1	1	0	0	0	0	1	0	0	0	0	0	0	4	2	60	2	4	1	1	3	0	0	6.1718	21.0903	1	13	1	8	4	63	40	38	15	1810	69	143	96	94	178	124	44	84	59	64	105	79	11
1042	0	0	0	0	0	0	0	0	0	0	0	0	0	0	4	2	37	2	4	1	1	1	0	0	3.5765	15.8118	1	9	1	9	2	55	24	14	15	1755	49	80	66	113	173	131	51	84	62	70	97	83	17
1047	0	0	0	0	0	0	1	0	0	0	0	0	0	0	4	1	47	4	2	1	1	1	0	0	1.8013	7.3333	1	5	1	2	1	35	15	17	15	8010	66	84	75	103	170	145	57	89	72	78	123	101	11
1056	1	0	0	0	0	0	0	0	0	0	0	0	0	0	5	2	78	3	#NULL!	1	1	2	1	1	3.9357	3.8632	1	5	1	9	4	52	54	48	15	3275	79	164	118	68	133	98	41	85	63	57	97	76	4
1062	1	0	0	0	0	0	0	0	0	0	0	0	0	0	4	2	76	3	#NULL!	2	1	3	0	0	3.1046	7.1493	1	10	2	6	3	65	35	30	8	2535	71	119	90	100	162	123	38	67	52	59	91	76	12
1068	0	0	0	0	0	0	0	1	0	0	0	0	0	0	4	1	78	3	#NULL!	1	1	3	0	0	11.7612	15.6674	1	14	1	6	4	59	47	28	15	2455	100	117	109	93	132	113	35	68	52	59	89	72	16
1079	0	0	0	0	0	0	0	0	0	0	0	0	0	0	4	1	47	2	4	1	1	3	1	1	26.1678	26.3083	1	11	2	14	4	65	50	51	7	985	74	112	93	75	127	93	40	67	52	57	87	67	14
1085	0	1	0	0	0	0	0	0	0	0	0	0	0	0	4	1	34	4	2	1	1	3	0	0	3.0695	8.0882	0	3	1	5	4	62	19	47	15	7475	99	116	106	84	139	110	42	80	59	59	97	79	19
1088	0	0	0	0	0	0	0	1	0	0	0	0	0	0	4	2	68	3	2	1	1	3	0	0	8.6005	17.5	1	12	1	2	3	38	27	33	15	635	94	116	101	92	111	102	52	69	59	66	82	74	21
1093	0	0	0	0	0	0	0	0	0	0	0	0	0	0	4	2	51	4	2	1	1	3	0	0	2.2448	4.7014	1	12	1	4	3	40	41	33	15	1185	50	75	58	93	148	115	45	85	64	61	106	81	10
1096	0	0	0	0	0	0	0	0	0	0	0	0	0	0	4	1	45	4	2	1	1	3	0	0	2.8937	6.8708	0	11	1	4	2	27	37	30	15	895	68	85	74	87	132	101	46	78	57	62	98	72	18
1098	0	0	0	0	0	0	0	0	0	0	0	0	0	0	4	1	57	3	4	1	1	3	0	0	3.6425	4.8167	1	8	1	8	2	59	45	26	15	937	70	88	79	66	153	97	21	98	54	41	116	68	6
1103	0	0	0	0	0	0	0	0	0	0	0	0	0	0	5	2	28	4	2	1	1	2	0	0	2.95	8.8396	0	0	1	4	4	27	22	30	15	2290	86	125	109	94	143	124	56	86	78	68	101	92	14
1104	0	0	0	0	0	0	0	0	0	0	0	0	0	0	3	2	38	4	4	1	1	3	0	0	3.2225	7.9069	0	4	1	4	4	40	15	16	15	4425	83	116	100	104	177	149	44	92	70	69	112	90	13
1106	0	0	0	0	0	0	0	0	0	0	0	0	0	0	4	2	45	4	4	1	1	3	0	0	2.0121	32.9361	1	25	1	4	4	54	32	36	14	2500	95	144	115	76	131	94	35	81	57	48	96	65	26
1109	0	0	0	0	0	0	0	0	0	0	0	0	0	0	4	1	63	4	2	1	1	3	1	0	0.671	1.5215	1	14	1	4	4	44	52	34	9	920	86	127	110	137	169	155	60	94	81	89	117	105	16
1112	1	0	0	0	0	0	1	0	0	0	0	0	0	0	2	2	74	3	#NULL!	1	1	3	0	0	1.9839	10.9986	1	10	1	2	2	48	35	23	15	2300	66	174	82	145	187	168	37	99	75	78	124	106	13
1117	0	0	0	0	0	0	0	0	0	0	0	0	0	0	5	1	25	4	#NULL!	1	1	2	0	0	12.8218	18.6549	0	0	1	3	4	46	22	32	15	3585	65	114	90	73	157	124	34	75	63	45	101	83	14
1120	0	0	0	0	0	0	0	1	0	0	0	0	0	0	4	2	51	3	2	1	1	3	1	1	1.6194	1.5306	1	24	1	14	4	78	36	38	15	1345	95	113	104	106	130	119	28	84	62	60	94	81	14
1123	0	0	0	0	0	0	0	0	0	0	0	0	0	0	4	2	79	3	2	1	1	3	0	0	4.8826	11.6889	0	5	1	3	3	45	42	34	15	995	61	126	93	103	184	137	45	87	65	68	106	89	16
1135	1	0	0	0	0	0	0	1	0	0	0	0	0	0	4	2	62	4	2	1	1	3	0	0	10.8372	10.3306	0	15	1	2	4	47	38	45	15	670	73	102	85	110	150	134	55	75	67	70	98	87	12
1137	0	0	0	0	0	0	0	0	0	0	0	0	0	0	2	1	47	2	2	1	1	3	0	0	3.8199	9.841	1	34	1	6	3	64	33	30	15	1551	69	98	83	116	164	140	68	93	81	87	122	104	16
1148	0	0	0	0	0	0	0	0	0	0	0	0	0	0	4	2	58	4	2	1	1	3	0	0	1.9169	2.6451	1	11	1	5	2	46	35	34	14	2840	65	93	76	86	140	119	27	76	57	47	94	78	11
1174	0	0	0	0	0	0	0	0	0	0	0	0	0	0	2	2	77	3	2	1	1	3	0	0	7.7314	11.6278	0	12	1	7	2	51	46	34	15	1816	60	65	60	73	173	122	39	74	51	50	101	73	14
1183	0	0	0	0	0	0	0	0	0	0	0	0	0	0	2	1	77	4	#NULL!	1	1	1	0	0	2.0037	6.1292	0	0	1	4	2	38	32	37	14	1658	60	100	80	126	162	146	60	83	71	42	108	95	11
1193	1	1	0	0	0	0	1	1	0	0	0	0	0	0	5	2	68	4	2	1	1	3	1	0	1.0636	41.5806	1	29	1	10	4	59	49	36	15	350	89	104	96	82	112	95	33	71	52	50	81	66	18
1195	0	0	0	0	0	0	0	0	0	0	0	0	0	0	2	2	60	4	2	1	1	3	0	0	11.1876	16.8889	1	16	1	4	2	31	41	32	15	3390	51	86	70	7	282	186	64	149	95	86	202	124	6
1197	0	0	0	0	0	0	0	0	0	0	0	0	0	0	2	1	69	3	4	1	1	3	0	0	1.9929	7.5597	1	17	1	4	2	49	32	32	15	264	72	88	80	104	162	134	24	68	38	51	87	70	15
1206	0	0	0	0	0	0	0	0	0	0	0	0	0	0	2	2	56	2	2	1	1	3	0	0	3.2237	16.0347	1	19	1	5	4	58	30	23	15	2850	82	98	93	98	119	108	42	63	50	61	79	69	12
1241	0	0	0	0	0	0	0	0	0	0	0	0	0	0	2	2	65	2	4	1	1	1	0	0	23.2853	29.3465	1	22	1	3	2	36	34	32	15	1870	54	96	72	115	167	140	51	71	60	69	98	82	13
1256	0	0	0	0	0	0	0	0	0	0	0	0	0	0	5	1	58	2	2	1	1	1	0	0	5.9618	10.0896	0	15	1	7	2	46	38	32	15	782	61	82	73	94	168	122	56	88	70	71	193	92	8
1257	0	0	0	0	0	0	0	0	0	0	0	0	0	0	4	1	64	4	#NULL!	1	1	3	0	0	8.0293	8.9813	0	0	1	7	3	41	33	36	14	1980	76	131	100	75	146	114	43	91	64	53	102	76	13
1266	1	1	1	0	0	0	0	1	0	0	0	0	0	0	4	2	79	3	2	1	1	3	0	0	2.942	58.5972	1	17	1	2	4	72	37	43	15	1270	71	149	86	86	132	116	35	66	49	60	83	71	18
1276	0	0	0	0	0	0	0	0	0	0	0	0	0	0	4	1	22	1	4	1	1	3	0	0	4.9591	14.6875	0	4	1	2	3	48	21	29	13	4475	97	132	115	111	151	130	47	101	67	72	114	88	18
1286	0	0	0	0	0	0	0	0	0	0	0	0	0	0	1	2	70	4	2	2	1	3	0	0	1.1998	2.0264	0	0	2	4	2	34	32	41	12	1010	74	121	86	83	186	117	55	108	74	66	125	84	12
1293	0	0	0	0	0	0	0	0	0	0	0	0	0	0	4	1	47	4	2	1	1	2	0	0	8.4177	17.9944	0	0	1	2	2	25	17	23	14	3090	69	92	79	115	155	133	40	61	49	60	87	74	18
1301	0	0	0	0	0	0	0	0	0	0	0	0	0	0	4	1	43	3	2	2	1	1	0	0	12.2139	17.1979	1	17	2	4	4	57	44	37	9	2525	64	145	96	27	219	113	23	204	77	24	209	89	10
1305	0	0	0	0	0	0	0	1	0	0	0	0	0	0	4	2	57	4	2	1	1	3	0	0	4.0803	9.2896	1	27	1	10	2	65	61	37	15	400	65	84	76	72	106	89	47	72	57	59	83	68	18
1309	0	0	0	0	0	0	0	0	0	0	0	0	0	0	4	2	56	4	2	1	1	2	0	0	2.6413	7.8757	0	0	1	4	3	76	49	44	6	2822	82	124	94	89	173	115	42	91	54	57	118	72	8
1314	0	0	0	0	0	0	0	0	0	0	0	0	0	0	5	2	70	4	#NULL!	1	1	2	0	0	6.7218	10.9069	1	0	1	4	3	31	40	40	15	1366	86	111	96	91	231	136	41	101	62	46	149	84	10
1322	0	0	0	0	0	0	0	0	0	0	0	0	0	0	3	2	55	3	4	1	1	1	0	0	2.9001	4.7292	0	16	1	3	2	25	28	35	15	2009	73	120	87	91	168	113	45	79	60	59	106	78	11
1323	0	0	0	0	0	0	0	0	0	0	0	0	0	0	4	1	53	3	#NULL!	1	1	2	0	0	1.3387	5.6458	1	-1	1	2	3	30	32	32	14	967	92	120	103	84	140	116	52	102	68	64	112	84	7
1329	1	0	0	0	0	0	0	0	0	0	0	0	0	0	4	2	56	4	2	1	1	3	0	0	1.8996	13.8243	1	24	2	9	2	59	35	37	11	970	67	90	76	77	133	109	23	65	50	41	87	70	15
1331	0	1	0	0	0	0	0	0	0	0	0	0	0	0	4	1	55	4	2	1	1	3	0	0	17.2222	55.0861	1	0	1	8	3	57	39	38	15	#NULL!	77	82	80	84	98	91	46	54	50	60	70	65	36
1342	0	0	0	0	0	0	0	0	0	0	0	0	0	0	4	1	73	3	#NULL!	1	1	1	1	1	19.6682	19.6688	1	0	1	9	3	70	58	45	15	968	99	140	116	3	159	96	33	104	61	41	120	73	12
1356	0	1	0	0	0	0	0	0	0	0	0	0	0	0	4	1	75	3	#NULL!	1	1	3	0	0	16.9988	16.9972	1	12	1	4	3	49	43	33	15	1770	63	106	85	75	143	104	43	70	56	58	94	73	18
1357	0	0	0	0	0	0	0	0	0	0	0	0	0	0	4	2	71	3	2	1	1	3	0	0	1.8226	11.8201	1	11	1	10	1	52	48	40	12	1067	53	74	62	90	182	130	39	88	60	56	125	84	9
1371	1	0	0	0	0	0	1	1	0	0	0	0	0	0	4	2	72	3	2	1	1	1	1	0	2.3025	23.9785	1	33	1	6	2	61	36	41	12	1360	75	84	78	101	142	125	37	73	54	60	91	75	12
1387	0	0	0	0	0	0	0	0	0	0	0	0	0	0	4	1	49	2	#NULL!	1	1	1	0	0	3.2705	9.2681	1	21	1	4	4	44	32	26	15	1097	98	134	116	119	154	137	75	97	85	91	116	104	21
1397	0	0	0	0	0	0	0	0	0	0	0	0	0	0	5	2	43	4	4	2	1	3	1	1	0.263	0.2639	1	12	1	7	4	71	60	51	15	28	131	142	137	74	146	107	31	94	64	54	106	80	7
1419	0	0	0	0	0	0	1	1	0	0	0	0	0	0	5	2	74	4	2	2	1	1	0	0	7.0723	11.0528	0	14	1	6	2	27	24	24	15	4005	71	80	74	100	144	118	51	68	59	68	94	79	13
1423	0	0	0	0	0	0	0	0	0	0	0	0	0	0	3	2	43	4	4	1	1	2	0	0	14.9218	14.9181	0	0	1	2	4	33	20	41	15	10270	88	114	102	101	152	131	51	80	62	68	107	83	6
1441	1	0	0	0	0	0	0	0	0	0	0	0	0	0	4	1	68	3	2	1	1	1	0	0	4.6388	16.7875	1	20	1	4	2	22	26	30	14	3327	73	98	84	107	159	128	53	87	66	59	135	91	12
1452	0	0	0	0	0	0	0	1	0	0	0	0	0	0	4	1	57	4	2	1	1	3	0	0	0.758	13.8681	1	15	1	4	4	48	42	23	15	1750	44	111	75	79	112	95	46	76	57	53	82	66	12
1463	0	0	0	0	0	0	0	0	0	0	0	0	0	0	4	1	22	4	4	1	1	2	0	0	1.7241	5.5757	0	0	1	3	3	29	10	16	15	2334	66	123	98	102	146	122	48	89	69	66	104	87	10
1469	0	1	0	0	0	0	0	0	0	0	0	0	0	0	4	2	49	3	1	1	1	2	0	0	2.5883	6.3688	0	-1	1	4	3	45	24	28	14	1335	96	115	106	91	115	106	39	52	47	61	74	67	11
1470	1	1	0	0	0	0	1	1	0	0	0	0	0	0	4	2	39	4	#NULL!	1	1	3	1	1	31.1099	31.0236	1	26	1	7	4	37	19	26	14	3355	98	127	114	112	159	136	54	81	67	73	104	90	13
1494	0	0	0	0	0	0	0	0	0	0	0	0	0	0	4	2	47	3	1	1	1	3	0	0	1.9805	12.9035	1	14	1	5	4	29	19	30	15	2480	83	103	93	105	131	118	15	85	69	67	96	81	12
1496	0	0	0	0	0	0	0	0	0	0	0	0	0	0	2	1	45	4	1	1	1	3	0	0	4.0569	11.0139	0	8	1	2	3	74	48	38	15	5500	92	120	105	6	120	94	2	85	52	4	97	65	21
1521	0	0	0	0	0	0	1	1	0	0	0	0	0	0	5	1	68	3	#NULL!	1	1	3	1	1	11.5494	11.3639	1	15	1	6	3	91	47	39	15	790	72	91	80	91	119	102	30	92	46	53	101	64	4
1530	0	0	0	0	0	0	0	0	0	0	0	0	0	0	4	2	59	4	2	2	1	2	0	0	6.3386	8.0063	0	0	1	7	4	38	21	36	14	1010	83	114	101	73	113	92	50	73	59	59	87	71	9
1539	0	0	0	0	0	0	0	1	0	0	0	0	0	0	4	1	71	3	4	1	1	2	0	0	3.235	15.309	0	21	1	7	3	69	46	36	14	1793	83	117	96	97	136	119	46	83	63	63	176	87	11
1543	0	0	0	0	0	0	0	0	0	0	0	0	0	0	4	2	61	4	2	1	1	1	0	0	2.8574	6.359	1	15	1	8	2	37	39	31	14	3055	58	79	69	90	185	138	39	72	55	53	111	83	11
1563	1	0	0	0	0	0	0	0	0	0	0	0	0	0	4	2	79	3	2	1	1	1	0	0	22.6392	22.5556	1	5	1	6	3	33	41	36	8	1645	79	124	97	105	159	133	49	89	64	69	109	86	16
1571	0	1	0	0	0	0	0	0	0	0	0	0	0	0	4	2	67	3	2	1	1	3	0	0	1.0752	5.134	1	22	1	8	4	49	30	27	15	880	77	92	84	89	113	100	33	72	50	51	72	62	14
1578	1	0	0	0	0	0	0	1	0	0	0	0	0	0	4	1	78	3	4	2	1	3	0	0	6.7405	13.6632	1	24	1	4	1	44	31	21	15	2620	60	87	66	103	128	113	38	53	46	54	81	64	20
1579	1	1	0	0	0	0	0	0	0	0	0	0	0	0	4	1	73	3	2	1	1	3	1	0	1.9616	56.5167	1	23	1	7	4	57	56	28	15	1417	63	95	81	93	125	110	47	73	58	66	86	75	20
1594	0	1	0	0	0	0	0	0	0	0	0	0	0	0	3	2	59	2	1	3	1	3	1	1	5.6537	5.3125	1	12	1	3	3	36	31	29	15	1490	74	100	82	123	155	140	73	98	87	89	111	99	24
1601	1	1	0	0	0	0	0	0	0	0	0	0	0	0	4	2	78	3	2	1	1	3	0	0	2.6758	3.7368	1	12	1	6	3	45	31	29	15	1350	81	105	89	84	121	102	39	65	54	55	82	70	13
1602	0	1	0	0	0	0	0	0	0	0	0	0	0	0	4	2	56	3	1	1	1	2	0	0	0.7628	7.9583	1	-2	1	9	2	42	40	33	14	1830	59	74	65	92	159	121	48	91	67	63	117	87	10
1603	0	0	0	0	0	0	0	0	0	0	0	0	0	0	4	2	71	3	2	1	1	3	0	0	1.0016	12.8354	1	20	1	3	2	32	43	23	15	2395	56	83	69	91	119	105	40	80	54	58	93	71	14
1604	1	1	0	0	0	0	0	1	0	0	0	0	0	0	4	2	79	2	2	1	1	2	0	0	4.2775	52.0104	1	17	1	2	2	27	26	30	15	3755	89	120	100	109	167	136	58	95	75	74	121	95	21
1606	0	1	0	0	0	0	0	0	0	0	0	0	0	0	1	2	79	3	2	1	1	3	0	0	3.9295	9.85	1	5	2	5	4	84	54	38	9	1715	110	133	118	74	129	100	42	88	54	55	95	69	16
1609	1	0	0	0	0	0	0	0	0	0	0	0	0	0	1	1	80	3	#NULL!	1	1	1	1	1	1.1379	1.0417	1	5	1	4	3	73	54	52	15	3026	43	138	85	61	186	104	26	103	55	6	131	66	5
1610	1	1	0	0	0	0	0	0	0	0	0	0	0	0	4	2	72	3	2	2	1	3	1	1	13.9773	16.6174	1	10	1	5	3	77	44	43	6	2267	79	111	88	111	190	138	49	127	78	73	168	102	27
1611	0	0	0	0	0	0	0	1	0	0	0	0	0	0	4	1	66	2	1	2	1	3	0	0	2.9068	7.9465	0	9	2	5	3	54	41	29	13	1617	79	101	89	71	111	89	22	60	39	40	70	56	7
1620	0	0	0	0	0	0	0	0	0	0	0	0	0	0	5	1	30	4	2	1	1	3	0	0	2.6108	7.8979	1	8	1	7	4	41	37	24	15	2120	56	121	80	85	195	109	22	85	55	47	122	73	12
1636	1	0	0	0	0	0	0	1	0	0	0	0	0	0	4	2	68	3	4	2	1	3	0	0	5.1445	41.5646	1	19	1	6	3	54	28	24	15	1085	84	118	97	100	163	143	55	74	65	71	104	90	14
1637	0	0	0	0	0	0	0	0	0	0	0	0	0	0	5	1	58	4	#NULL!	1	1	1	0	0	4.9118	11.8965	0	-4	1	5	3	55	36	35	15	2080	76	125	102	81	157	119	40	76	57	52	104	76	14
1642	0	0	0	0	0	0	0	1	0	0	0	0	0	0	4	1	76	3	#NULL!	1	1	3	0	0	1.3355	0.8299	1	15	2	3	1	49	35	33	12	2063	69	82	74	97	127	111	43	63	54	49	77	67	19
1660	0	0	0	0	0	0	0	0	0	0	0	0	0	0	4	2	45	4	4	1	1	3	0	0	6.4202	20.5847	0	0	1	3	2	45	39	26	15	4300	78	128	96	84	127	101	35	78	60	54	90	74	20
1675	0	0	0	0	0	0	0	0	0	0	0	0	0	0	4	2	73	3	2	1	1	2	0	0	1.519	3.4785	0	0	1	3	3	46	31	31	15	2500	78	115	93	96	140	118	16	84	56	43	98	77	11
1679	0	0	0	0	0	0	0	0	0	0	0	0	0	0	2	1	45	3	4	1	1	3	0	0	2.938	21.7431	1	12	2	7	4	73	55	44	12	#NULL!	97	140	117	61	140	102	26	86	50	47	102	67	5
1683	0	0	0	0	0	0	0	0	0	0	0	0	0	0	4	2	44	3	#NULL!	1	1	2	0	0	1.2871	5.2681	0	-3	2	5	4	53	40	41	8	1855	80	108	98	90	148	119	38	96	60	55	105	80	21
1689	1	0	0	0	0	0	0	1	0	0	0	0	0	0	5	2	73	3	4	1	1	1	0	0	10.8599	14.2743	1	20	1	7	3	37	34	21	15	1866	54	76	66	90	153	111	30	69	48	54	90	70	12
1699	0	0	0	0	0	0	0	0	0	0	0	0	0	0	4	2	69	3	2	1	1	1	0	0	2.0357	9.6243	0	17	2	12	3	98	67	42	3	901	72	114	92	89	171	140	55	76	67	64	106	90	13
1704	0	1	0	0	0	0	0	0	0	0	0	0	0	0	4	2	45	2	4	1	1	3	1	0	3.8504	6.6229	1	11	1	9	3	73	46	37	15	800	86	116	99	76	104	96	33	54	45	47	69	62	11
1707	0	0	0	0	0	0	0	0	0	0	0	0	0	0	4	2	54	4	1	1	1	3	0	0	1.3596	4.6451	1	17	2	3	4	61	53	34	13	980	82	99	91	89	147	109	46	91	64	57	106	75	10
1719	0	0	0	0	0	0	0	0	0	0	0	0	0	1	4	1	52	4	2	1	1	3	1	0	5.6399	16.1674	1	20	1	11	3	56	39	24	14	1700	80	97	91	89	118	103	46	64	56	60	82	71	10
1739	0	0	0	0	0	0	0	0	0	0	0	0	0	0	5	2	72	3	2	1	1	3	0	0	1.6519	1.6444	1	23	1	5	2	49	46	32	15	334	77	102	89	84	117	96	39	56	48	54	76	64	16
1752	0	0	0	0	0	0	0	1	0	0	0	0	0	0	4	1	62	3	4	1	1	3	1	1	14.7271	14.5014	1	12	1	6	4	60	53	50	14	848	87	156	106	84	163	138	41	126	69	55	136	93	20
1757	0	0	0	0	0	0	0	1	0	0	0	0	0	0	4	1	74	3	#NULL!	1	1	1	0	0	3.5489	3.8042	1	10	1	3	1	18	27	12	#NULL!	#NULL!	#NULL!	#NULL!	#NULL!	#NULL!	#NULL!	#NULL!	#NULL!	#NULL!	#NULL!	#NULL!	#NULL!	#NULL!	#NULL!
1766	0	0	0	0	0	0	0	0	0	0	0	0	0	0	5	2	24	1	#NULL!	1	1	2	0	0	2.3939	4.4021	1	5	1	2	4	36	20	31	15	2940	76	107	93	89	165	129	46	89	69	59	110	87	13
1770	0	0	0	0	0	0	0	0	0	0	0	0	0	0	4	2	63	4	2	1	1	3	0	0	1.017	3.8715	1	15	1	2	2	30	36	33	15	580	98	114	107	99	129	114	54	81	64	72	92	81	16
1771	0	0	0	0	0	0	0	0	0	0	0	0	0	0	4	2	57	4	4	1	1	3	0	0	11.1659	11.1576	0	19	2	9	4	75	45	34	9	5035	105	152	123	92	184	130	45	99	70	60	106	82	14
1778	0	0	0	0	0	0	0	0	0	0	0	0	0	0	5	1	41	2	#NULL!	2	1	3	0	0	10.7558	10.7563	1	4	1	8	4	41	33	40	15	1460	82	111	101	72	135	102	37	79	58	50	102	74	15
1780	1	0	0	0	0	0	0	0	0	0	0	0	0	0	4	1	30	3	4	1	1	1	0	0	17.1856	53.441	0	15	1	14	4	73	47	39	15	206	70	114	84	90	132	112	49	86	64	61	99	81	12
1791	0	0	0	0	0	0	0	0	0	0	0	0	0	0	4	2	57	4	2	1	1	3	0	0	8.2937	17.0264	0	5	1	9	4	59	49	43	15	482	82	101	94	125	164	146	55	75	68	83	286	101	10
1797	1	0	0	0	0	0	0	0	0	0	0	0	0	0	4	2	71	3	2	1	1	3	0	0	1.6565	23.7708	0	8	2	5	3	42	44	34	8	3040	66	122	92	84	147	109	41	84	55	59	102	72	7
1798	0	0	0	0	0	0	0	0	0	0	0	0	0	0	5	1	59	4	#NULL!	1	1	3	1	0	5.6326	22.6389	1	12	2	12	4	80	59	41	12	1710	58	99	78	75	121	97	36	64	51	53	257	75	14
1799	1	0	0	0	0	0	0	0	0	0	0	0	0	0	4	2	52	2	4	1	1	3	0	0	15.6738	18.7819	1	11	1	6	4	70	37	40	15	1795	83	149	107	82	186	121	43	88	67	58	119	85	14
1804	1	0	0	0	0	0	0	1	0	0	0	0	0	0	4	2	76	3	#NULL!	2	1	2	0	0	1.4645	15.6215	1	17	1	3	1	37	38	34	15	1070	60	66	61	101	190	154	24	90	65	51	121	94	10
1807	0	0	0	0	0	0	0	0	0	0	0	0	0	0	5	1	75	3	#NULL!	1	1	3	1	1	2.2223	2.1486	1	16	1	4	4	54	47	42	15	606	69	97	78	80	198	144	29	120	59	52	130	84	12
1820	0	0	0	0	0	0	0	0	0	0	0	0	0	0	4	1	40	4	1	1	1	2	0	0	1.6829	6.5472	0	0	1	2	2	40	19	27	11	2710	70	133	95	108	146	128	55	82	72	76	99	90	7
1835	0	0	0	0	0	0	0	0	0	0	0	0	0	0	5	1	75	3	#NULL!	1	1	2	1	1	14.543	14.4646	1	11	1	2	4	23	35	31	15	3820	72	109	88	95	175	128	39	87	54	62	124	78	15
1840	1	1	0	0	0	0	0	0	0	0	0	0	0	0	4	2	78	3	4	1	1	3	0	0	2.0155	6.8576	1	17	1	6	4	42	43	36	15	1144	69	112	86	64	127	104	35	74	53	44	87	68	11
1849	0	0	0	0	0	0	0	0	0	0	0	0	0	0	4	2	59	4	2	1	1	3	0	0	1.8065	11.4563	1	12	1	6	3	73	51	35	15	230	87	111	95	77	118	95	41	77	59	53	91	71	14
1860	1	1	0	0	0	0	0	0	0	0	0	0	0	0	2	1	71	3	4	2	1	2	1	0	1.2912	24.7292	1	22	1	6	3	55	33	26	14	#NULL!	60	120	110	79	135	99	18	72	52	46	81	63	8
1890	1	0	0	0	0	0	0	1	0	0	0	0	0	0	5	2	77	3	4	1	1	3	0	0	4.5028	24.6118	1	12	1	5	1	43	31	32	14	643	75	81	76	91	130	106	33	56	42	49	78	60	6
1898	1	0	0	0	0	0	0	1	0	0	0	0	0	0	4	1	77	3	2	1	1	3	0	0	2.6217	8.7132	1	12	1	2	2	35	40	32	14	625	55	73	64	75	154	118	30	86	49	53	104	72	14
1900	0	0	0	0	0	0	0	0	0	0	0	0	0	0	4	2	51	3	2	2	1	1	0	0	1.7129	18.1826	0	5	1	5	2	72	38	37	14	596	54	84	68	73	193	135	38	75	59	50	117	80	5
1905	0	0	0	0	0	0	0	1	0	0	0	0	0	0	3	2	60	3	2	1	1	3	0	0	1.7084	7.6875	1	33	1	6	4	60	35	23	15	#NULL!	69	94	79	113	186	141	45	91	59	68	116	86	9
1909	0	0	0	0	0	0	0	0	0	0	0	0	0	0	4	2	71	3	#NULL!	1	1	1	0	0	1.5888	9.2403	0	0	1	5	2	36	35	17	#NULL!	#NULL!	#NULL!	#NULL!	#NULL!	#NULL!	#NULL!	#NULL!	#NULL!	#NULL!	#NULL!	#NULL!	#NULL!	#NULL!	#NULL!
1912	0	0	0	0	0	0	0	0	0	0	0	0	0	0	4	2	65	4	2	1	1	2	0	0	5.8454	10.5931	1	12	1	5	2	43	51	29	15	923	79	123	94	66	152	98	28	96	60	45	108	73	7
1931	1	0	0	0	0	0	0	1	0	0	0	0	0	0	4	2	74	3	2	4	1	3	0	0	1.4807	7.1813	1	22	1	6	2	51	33	24	15	3965	70	78	73	81	116	98	37	64	49	54	81	65	16
1944	0	0	0	0	0	0	0	0	0	0	0	0	0	0	4	2	51	4	2	4	1	3	0	0	0.8007	5.8361	1	12	1	4	3	45	29	21	15	2380	80	97	90	88	136	116	35	66	55	53	88	75	12
1972	0	0	0	0	0	0	0	0	0	0	0	0	0	0	1	2	65	1	2	1	1	3	0	0	6.0382	14.8292	1	17	1	3	4	53	43	40	15	2730	72	120	93	97	186	134	46	86	64	63	270	95	15
1974	0	1	0	0	0	0	0	0	0	0	0	0	0	0	4	1	72	3	2	1	1	3	1	1	3.7587	3.6583	1	5	1	4	4	43	40	47	15	643	56	135	92	76	145	109	40	90	59	51	109	79	14
1978	0	0	0	0	0	0	0	0	0	0	0	0	0	0	4	1	43	2	4	1	1	3	0	0	18.6173	51.691	0	14	1	10	4	68	47	37	15	3395	78	121	101	69	127	96	31	73	56	43	88	69	16
1988	0	0	0	0	0	0	0	0	0	0	0	0	0	0	2	1	56	4	4	2	1	3	0	0	2.2827	13.1556	1	5	1	5	2	40	21	28	14	#NULL!	64	84	75	131	193	156	59	115	93	80	133	108	15
1995	0	1	0	0	0	0	0	1	0	0	0	0	0	0	4	1	73	3	#NULL!	1	1	3	1	0	8.9135	11.7938	1	33	1	9	3	73	56	39	14	407	77	128	93	78	148	112	34	71	47	51	90	64	7
2007	0	0	0	0	0	0	0	0	0	0	0	0	0	0	3	2	56	2	2	1	1	2	0	0	0.97	18.9653	0	11	1	2	3	26	26	42	15	665	84	118	96	109	160	123	39	84	59	63	109	80	10
2014	0	0	0	0	0	0	0	1	0	0	0	0	0	0	5	2	61	4	2	1	1	3	1	0	1.9518	8.6458	1	7	1	3	4	60	34	35	10	1520	73	105	88	128	162	139	55	74	62	80	101	88	17
2021	0	0	0	0	0	0	0	0	0	0	0	0	0	0	4	1	67	3	2	1	1	1	0	0	4.0726	13.9646	1	14	1	3	3	51	40	32	15	1550	90	114	103	95	151	125	46	103	72	69	189	93	13
2031	1	0	0	0	0	0	0	0	0	0	0	0	0	0	4	1	72	3	4	1	1	3	1	0	1.0564	18.0826	1	17	2	3	4	58	32	29	10	985	72	100	87	90	140	115	35	70	54	56	93	74	17
2040	0	0	1	0	0	0	0	1	0	0	0	0	0	0	3	2	63	3	2	1	1	3	0	0	1.8283	20.859	1	20	1	11	3	70	56	48	12	405	69	108	83	116	165	138	39	86	53	66	112	81	10
2074	0	0	0	0	0	0	0	1	0	0	0	0	0	0	4	1	57	2	2	1	1	3	0	0	4.9124	9.4333	1	22	1	7	2	36	26	42	14	2490	91	123	102	102	156	118	19	79	46	44	106	62	11
2075	0	0	0	0	0	0	0	0	0	0	0	0	0	0	4	2	61	4	2	1	1	2	0	0	18.7616	18.7375	0	11	1	8	4	64	43	40	15	1840	88	113	106	75	147	110	43	75	62	59	97	77	28
2078	1	0	0	0	0	0	0	1	0	0	0	0	0	0	4	2	80	4	1	2	1	3	0	0	0.8513	0.8521	1	17	2	9	3	57	51	54	9	505	100	129	115	97	154	131	58	104	80	69	114	92	4
2092	0	1	0	0	0	0	0	1	0	0	0	0	0	0	4	2	54	4	2	2	1	3	0	0	15.6108	36.8938	0	22	1	3	1	32	29	35	15	535	60	82	70	140	191	164	58	120	88	78	129	107	15
2094	0	0	0	0	0	0	0	0	0	0	0	1	0	0	4	2	63	4	2	1	1	2	0	0	23.3598	28.7708	0	5	2	5	4	37	43	35	13	6295	71	126	88	91	203	160	40	114	67	72	122	92	18
2100	0	0	0	0	0	0	0	0	0	0	0	0	0	0	4	2	65	4	2	1	1	3	0	0	1.2011	9.034	1	17	1	5	2	23	31	27	15	2300	75	127	98	95	131	116	49	86	63	66	101	81	14
2116	0	0	0	0	0	0	0	0	0	0	0	0	0	0	4	1	63	3	#NULL!	3	1	3	0	0	7.2548	14.7931	1	6	1	4	2	54	42	38	15	1238	90	133	108	75	145	101	35	66	50	49	90	67	14
2124	0	1	0	0	0	0	0	0	0	0	0	0	0	0	4	1	80	3	2	1	1	3	0	0	2.3749	11.3938	0	9	2	4	3	48	58	40	13	643	73	89	79	87	126	106	40	67	47	53	71	61	18
2127	1	0	0	0	0	0	0	0	0	0	0	0	0	0	4	1	72	3	2	1	1	1	0	0	0.8122	3.9785	1	8	1	2	2	31	25	32	15	700	70	75	70	126	180	152	50	77	63	73	135	94	14
2135	0	0	0	0	0	0	0	0	0	0	0	0	0	0	4	2	72	3	2	1	1	3	0	0	0.8015	2.7215	1	14	1	2	3	31	22	24	15	1756	81	114	93	108	158	134	55	98	75	73	111	95	12
2136	1	1	0	0	0	0	0	0	0	0	0	0	0	0	2	2	67	3	2	4	1	3	0	0	2.0175	11.5313	1	16	1	8	3	41	29	27	13	#NULL!	87	112	98	107	151	127	46	78	64	67	99	85	15
2151	0	0	0	0	0	0	0	0	0	0	0	0	0	0	4	2	45	4	4	1	1	3	0	0	17.9022	17.9146	0	9	1	2	2	34	31	32	15	3965	86	132	100	87	205	151	54	85	71	74	125	97	14
2156	1	1	0	0	0	0	0	0	0	0	0	0	0	0	4	2	60	3	1	1	1	3	0	0	1.948	10.7646	1	17	1	5	2	65	38	27	15	5345	30	70	56	76	128	94	27	76	39	45	86	57	12
2159	0	0	0	0	0	0	0	0	0	0	0	0	0	0	4	1	52	4	2	1	1	3	0	0	3.1584	7.1146	0	8	1	3	3	30	22	28	15	3585	86	122	99	78	217	122	49	108	63	65	224	87	16
2165	0	1	0	0	0	0	0	0	0	0	0	0	0	0	4	2	75	3	2	1	1	3	1	1	21.0072	23.6389	1	11	2	14	4	84	67	45	9	728	58	108	81	59	241	105	20	237	47	38	239	64	7
2170	0	0	0	0	0	0	0	0	0	0	0	0	0	0	4	2	51	3	4	1	1	3	0	0	1.6261	4.7715	0	7	1	3	3	34	19	19	15	1550	90	106	95	113	148	130	59	110	73	79	123	92	14
2172	1	0	0	0	0	0	0	1	0	0	0	0	0	0	4	2	34	4	4	1	1	3	1	0	0.9654	13.2458	1	19	1	3	3	31	19	34	15	450	67	106	84	103	114	108	55	72	62	72	86	78	24
2176	0	0	0	0	0	0	0	0	0	0	0	0	0	0	4	2	45	4	2	1	1	3	0	0	9.3321	19.1104	0	-7	1	4	4	34	23	38	15	1520	73	108	91	104	152	123	52	84	68	68	98	80	14
2195	0	1	0	0	0	0	0	0	0	0	0	0	0	0	5	1	58	4	2	1	1	1	1	1	9.8057	16.3743	1	19	1	13	3	105	58	36	10	50	71	103	84	80	115	95	33	77	46	51	84	61	7
2197	0	0	0	0	0	0	0	0	0	0	0	0	0	0	4	2	44	4	2	1	1	1	0	0	35.9776	35.9826	0	4	1	3	4	26	34	50	13	6955	82	121	96	108	160	132	69	104	81	82	137	99	4
2200	0	0	0	0	0	0	0	0	0	0	0	0	0	0	4	1	41	2	2	1	1	3	0	0	2.7084	8.5924	1	17	1	6	3	32	26	41	15	542	81	123	94	90	163	111	48	91	71	60	104	80	11
2208	0	0	0	0	0	0	0	1	0	0	0	0	0	0	4	2	68	3	#NULL!	1	1	3	0	0	2.0545	12.8549	1	14	1	5	3	35	26	34	15	1083	52	75	61	119	167	137	39	69	52	58	103	78	11
2210	0	0	0	0	0	0	0	1	0	0	0	0	0	0	4	1	78	3	2	1	1	1	0	0	0.7067	0.6736	1	12	1	6	2	62	50	35	15	356	63	71	67	114	133	125	37	70	48	64	91	74	9
2222	0	0	0	0	0	0	0	0	0	0	0	0	0	1	4	2	74	3	2	2	1	1	1	1	34.2032	38.9736	1	15	1	13	2	63	53	24	15	786	66	90	78	108	138	122	39	63	48	63	93	74	9
2225	0	1	0	0	0	0	1	0	0	0	0	0	0	1	5	2	67	2	#NULL!	1	1	1	1	1	7.5586	24.7889	1	23	1	15	4	123	74	44	15	170	79	108	90	25	128	98	20	64	46	22	85	61	12
2265	1	1	0	0	0	0	0	1	0	0	0	0	0	0	4	2	76	4	2	2	1	3	0	0	2.8662	13.7049	1	12	1	5	2	30	31	29	15	1485	68	95	81	80	159	135	37	75	49	52	97	77	16
2309	0	0	0	0	0	0	0	0	0	0	0	0	0	0	4	1	79	3	2	1	1	3	1	1	1.4094	1.4111	1	17	2	8	3	71	75	45	7	50	60	68	63	93	150	122	25	112	48	57	124	73	10
2310	0	1	0	0	0	0	0	1	0	0	0	0	0	0	5	2	74	3	2	1	1	3	0	0	16.0852	25.8326	0	7	1	3	2	32	26	38	12	1145	70	89	81	135	181	149	63	84	71	89	179	102	18
2349	0	0	0	0	0	0	0	0	0	0	0	0	0	0	4	1	50	3	4	1	1	3	0	0	1.3305	8.1563	1	-3	1	2	3	32	22	23	14	3020	63	122	88	95	128	113	52	79	66	67	95	82	10
2362	0	0	0	0	0	0	0	0	0	0	0	0	0	0	4	2	74	3	#NULL!	1	1	3	1	1	6.022	6.9514	1	14	1	2	2	40	44	38	14	853	69	137	87	101	182	143	52	100	70	73	134	96	11
2365	0	0	0	0	0	0	0	0	0	0	0	0	0	0	4	1	48	3	4	1	1	3	0	0	9.1491	10.8424	1	5	2	7	3	42	49	28	9	1985	95	128	107	98	159	123	41	99	62	61	116	82	13
2369	0	0	0	0	0	0	0	0	0	0	0	0	0	0	4	2	64	4	2	1	1	1	0	0	1.3411	7.6889	0	11	1	5	3	21	31	25	15	2775	76	96	84	135	201	172	61	91	71	90	123	105	13
2374	0	0	0	0	0	0	0	0	0	0	0	0	0	0	4	1	42	2	4	1	1	3	0	0	4.1434	14.9299	0	0	2	3	4	29	23	30	13	2152	92	117	105	92	117	104	45	63	53	64	81	70	26
2385	0	0	0	0	0	0	0	1	0	0	0	0	0	0	5	1	67	3	#NULL!	1	1	3	0	0	6.0274	11.859	1	21	2	2	4	52	45	32	13	780	87	117	106	94	183	147	27	100	65	49	120	92	12
2386	0	1	0	0	0	0	0	0	0	0	0	0	0	0	2	2	60	2	2	1	1	3	0	0	3.8962	3.8486	1	6	2	10	3	50	32	27	9	2970	81	105	90	83	138	110	43	77	58	61	87	70	15
2388	0	0	0	0	0	0	0	0	0	0	0	0	0	0	4	1	47	4	2	1	1	1	0	0	1.5245	9.8139	0	0	1	2	2	32	32	28	15	1445	87	113	100	91	156	120	46	98	69	62	109	87	15
2394	0	0	0	0	0	0	0	0	0	0	0	0	0	0	5	2	42	4	4	1	1	3	0	0	0.8234	2.6493	0	3	1	2	3	24	19	27	15	3500	81	118	96	97	117	108	43	73	57	61	83	69	18
2401	0	1	0	0	0	0	0	0	0	0	0	0	0	0	4	1	35	4	4	1	1	1	1	1	10.7311	28.9708	1	17	1	11	4	103	48	43	15	717	96	138	125	67	110	90	36	65	50	54	75	65	19
2405	1	0	0	0	0	0	0	0	0	0	0	0	0	0	4	1	79	3	#NULL!	1	1	3	0	0	1.3362	10.1382	0	8	2	4	3	52	36	42	10	1158	63	119	82	94	142	113	32	74	43	57	90	66	14
2417	1	0	0	0	0	0	0	1	0	0	0	0	0	0	5	1	79	3	2	1	1	3	1	1	1.3898	1.3535	1	17	1	14	4	122	83	60	15	62	57	125	80	51	242	126	13	121	60	1	189	82	5
2420	0	1	0	0	0	0	0	0	0	0	0	0	0	0	4	1	52	2	4	2	1	3	0	0	0.9093	5.7924	0	4	1	3	3	47	22	28	14	2617	89	148	112	93	242	141	40	120	64	53	142	84	14
2423	1	0	0	0	0	0	0	1	0	0	0	0	0	0	4	2	79	3	2	1	1	3	0	0	1.5245	16.9819	1	25	1	5	3	36	39	21	15	3360	77	112	89	93	129	111	44	82	62	63	98	78	15
2425	0	1	0	0	0	0	0	0	0	0	0	0	0	0	4	2	67	3	2	1	1	3	0	0	2.0208	15.0681	1	22	1	3	3	53	53	23	15	2930	76	92	84	90	126	106	46	63	53	58	79	66	15
2427	0	0	0	0	0	0	0	0	0	0	0	0	0	0	4	1	76	3	#NULL!	2	1	3	0	0	1.8556	3.9771	1	3	1	5	4	64	41	26	15	1930	64	114	85	75	152	110	38	64	47	52	79	63	13
2459	0	0	0	0	0	0	0	0	0	0	0	0	0	0	5	2	55	4	2	1	1	3	0	0	27.0987	50.125	1	10	1	5	3	54	41	35	15	1863	42	62	49	83	130	97	40	69	53	54	89	68	14
2460	0	0	0	0	0	0	0	0	0	0	0	0	0	0	4	1	48	2	#NULL!	1	1	3	0	0	2.8226	11.5458	0	15	1	4	4	64	37	34	13	1530	92	122	108	122	179	151	61	144	96	81	171	117	25
2464	1	1	0	0	0	0	0	1	0	0	0	0	0	0	4	1	70	4	2	1	1	1	0	0	16.0239	28.5035	1	24	1	8	4	60	53	39	15	309	108	136	119	84	138	100	47	71	54	61	96	73	12
2473	0	0	0	0	0	0	0	1	0	0	0	0	0	0	4	2	50	2	4	1	1	1	0	0	3.9077	11.8743	0	18	1	7	1	56	37	21	15	2780	60	83	71	99	179	151	63	84	72	94	121	102	13
2476	1	1	0	0	0	0	0	0	0	0	0	0	0	0	2	1	69	3	1	1	1	3	0	0	3.0053	6.0208	1	10	1	6	3	53	28	25	15	#NULL!	63	86	76	74	135	108	20	57	35	40	81	59	9
2478	0	1	0	0	0	0	0	0	0	0	0	0	0	1	5	2	56	4	3	1	1	3	1	1	4.9913	12.4285	1	24	1	16	3	87	61	46	15	195	82	112	96	72	128	105	38	95	61	47	107	76	12
2482	0	0	0	0	0	0	0	0	0	0	0	0	0	0	4	2	68	3	2	3	1	2	1	1	10.6274	29.966	1	15	1	6	4	37	43	33	15	4020	59	111	81	93	193	130	42	81	55	57	124	79	10
2486	0	0	0	0	0	0	0	1	0	0	0	0	0	0	4	2	57	4	2	1	1	3	0	0	0.9532	4.05	1	23	1	10	1	88	48	33	6	2215	54	75	66	92	119	109	37	75	44	55	86	66	9
2496	0	0	0	0	0	0	0	1	0	0	0	0	0	0	4	2	61	4	2	1	1	3	0	0	1.0298	14.9514	0	12	1	3	1	40	23	17	15	1485	72	83	76	98	123	107	51	80	58	67	94	75	13
2497	0	1	0	0	0	0	0	0	0	0	0	0	0	0	4	1	73	3	1	1	1	3	0	0	3.9604	3.9646	1	6	1	4	4	47	36	45	11	1668	106	129	114	115	159	140	64	96	81	83	120	104	11
2508	0	0	0	0	0	0	0	0	0	0	0	0	0	0	5	2	67	3	#NULL!	1	1	3	0	0	2.1767	17.9014	1	5	1	5	3	42	45	37	15	1360	79	121	93	78	185	118	59	113	76	63	128	90	12
2512	0	0	0	0	0	0	0	0	0	0	0	0	0	0	4	2	51	4	2	1	1	1	0	0	0.6057	19.9563	1	10	1	3	2	38	22	28	15	1240	73	100	81	139	196	172	71	91	79	94	130	112	8
2538	0	0	0	0	0	0	0	0	0	0	0	0	0	0	4	2	67	3	1	1	1	3	1	1	5.0491	12.9	1	15	1	8	4	82	70	39	15	4635	112	142	130	53	135	91	29	67	48	29	86	63	15
2553	0	1	0	0	0	0	0	1	0	0	0	0	0	0	5	2	46	2	3	1	1	3	1	0	2.0399	40.0194	1	26	2	15	2	80	48	30	9	1037	59	63	61	92	117	105	41	71	53	58	86	70	16
2570	0	0	0	0	0	0	0	0	0	0	0	0	0	0	5	2	56	4	4	1	1	3	1	1	2.1582	1.5653	1	16	1	18	4	108	66	54	15	187	96	146	110	78	116	99	46	65	56	57	94	70	19
2577	0	0	0	0	0	0	1	0	0	0	0	0	0	0	4	1	65	3	4	2	1	1	0	0	1.871	9.884	0	5	1	3	4	40	37	34	15	820	63	95	80	79	165	121	38	76	55	50	108	76	10
2582	0	0	0	0	0	0	0	1	0	0	0	0	0	0	2	2	58	2	1	2	1	3	0	0	3.0168	14.8583	0	12	1	3	2	46	28	24	15	2975	83	122	97	172	214	192	72	111	96	108	145	128	16
2586	0	1	0	0	0	0	0	0	0	0	0	0	0	0	4	1	52	3	2	2	1	3	0	0	2.1634	6.2972	1	5	1	6	4	64	35	32	14	2190	59	112	80	88	124	107	36	66	56	35	82	71	14
2589	1	1	0	0	0	0	0	0	0	0	0	0	0	0	4	2	64	4	2	1	1	3	0	0	3.7039	5.9799	1	17	1	10	2	35	28	31	14	3525	63	133	94	89	147	110	42	90	61	57	95	74	14
2596	0	0	0	0	0	0	0	0	0	0	0	0	0	0	5	2	76	3	2	1	1	3	0	0	1.1177	5.7556	1	14	2	9	4	86	64	34	3	2030	63	93	80	89	132	109	39	86	58	57	97	75	14
2603	1	1	0	0	0	0	0	0	0	0	0	0	0	0	1	2	77	3	2	1	1	3	0	0	5.0772	10.9972	1	28	1	5	4	97	72	44	15	1253	97	168	139	77	120	99	45	82	62	57	88	73	17
2616	0	0	0	0	0	0	0	0	0	0	0	0	0	0	5	1	58	2	2	1	1	2	0	0	1.8837	15.6097	0	0	2	6	4	62	38	44	11	2055	71	112	92	83	162	111	44	89	61	57	110	78	15
2638	1	1	1	0	0	0	1	0	0	0	0	0	0	0	4	2	79	3	2	1	1	1	1	0	1.1973	16.066	1	19	1	5	3	46	46	26	14	1980	74	97	84	98	150	124	34	64	51	55	97	77	14
2644	0	1	0	0	0	0	0	1	0	0	0	0	0	0	4	1	72	3	2	1	1	3	0	0	4.0442	9.9639	0	15	1	9	3	86	52	40	14	372	79	99	87	95	174	125	28	74	43	2	97	63	14
2647	0	0	0	0	0	0	0	0	0	0	0	0	0	0	5	2	46	4	#NULL!	1	1	3	1	1	3.807	3.8076	1	17	1	7	4	66	42	49	15	630	39	150	118	115	180	142	53	101	78	81	119	99	17
2648	0	0	0	0	0	0	0	1	0	0	0	0	0	0	4	1	77	4	1	1	1	3	0	0	1.6001	5.8722	1	22	1	2	2	54	47	31	15	1425	61	89	71	80	156	102	27	88	53	45	111	69	10
2664	0	0	0	0	0	0	0	1	0	0	0	0	0	0	4	1	65	2	4	1	1	3	0	0	6.6773	18.0993	1	18	1	6	1	43	25	28	14	1735	68	86	77	72	117	94	15	58	44	38	77	61	16
2665	1	0	0	0	0	0	0	0	0	0	0	0	0	0	5	2	27	5	4	1	1	2	0	0	0.8152	5.6153	0	5	1	2	3	33	12	32	15	2600	72	93	83	120	148	137	67	102	87	84	217	108	10
2666	0	1	0	0	0	0	0	0	0	0	0	0	0	0	1	1	64	1	2	1	1	3	0	0	3.9317	9.566	0	6	1	9	3	56	49	35	15	2450	77	115	86	64	209	118	34	98	64	44	132	82	13
2682	0	0	0	0	0	0	0	1	0	0	0	0	0	0	4	2	76	3	2	3	1	3	0	0	8.1542	14.3715	1	20	1	8	1	33	45	26	15	3156	63	89	74	86	176	128	44	101	74	55	129	91	14
2688	0	0	0	0	0	0	0	0	0	0	0	0	0	0	4	1	66	3	2	1	1	3	0	0	5.1665	9.0486	1	15	1	3	4	49	31	38	14	915	96	142	120	92	160	124	50	98	68	60	104	81	8
2690	1	1	0	0	0	0	0	1	0	0	0	0	0	0	4	2	47	4	2	1	1	3	1	0	1.2025	34.2104	1	29	1	6	3	67	47	34	14	900	97	153	114	83	103	93	36	56	45	53	72	61	24
2701	0	0	0	0	0	0	0	0	0	0	0	0	0	0	5	2	34	3	4	1	1	3	0	0	1.6106	4.4118	0	-4	2	2	3	28	24	38	13	3100	55	98	76	88	158	121	50	90	62	61	88	74	14
2702	0	0	0	0	0	0	0	1	0	0	0	0	0	0	4	1	80	3	1	1	1	1	1	1	6.3682	10.3528	1	12	1	8	3	48	44	46	14	1109	91	121	104	85	137	108	41	72	52	56	84	71	18
2704	0	1	0	0	0	0	0	0	0	0	0	0	0	0	4	1	26	1	4	1	1	1	0	0	25.7676	31.6146	1	-3	1	3	4	45	27	30	15	1435	60	100	78	76	133	98	29	72	44	3	82	60	9
2706	0	0	0	0	0	0	0	0	0	0	0	0	0	0	4	1	56	3	4	1	1	3	0	0	13.9169	13.8868	1	15	1	5	4	60	32	43	15	1440	74	104	89	90	167	115	44	93	60	60	130	82	15
2718	0	0	0	0	0	0	0	1	0	0	0	0	0	0	4	1	78	3	4	2	1	3	0	0	1.6309	3.4583	1	17	1	2	4	34	24	42	15	3215	69	99	87	102	159	132	38	73	57	54	94	75	10
2724	0	0	0	0	0	0	0	0	0	0	0	0	0	0	5	2	62	4	1	1	1	3	0	0	12.845	17.8021	0	3	1	2	0	22	18	17	#NULL!	#NULL!	#NULL!	#NULL!	#NULL!	#NULL!	#NULL!	#NULL!	#NULL!	#NULL!	#NULL!	#NULL!	#NULL!	#NULL!	#NULL!
2729	0	0	0	0	0	0	0	0	0	0	0	0	0	0	5	2	51	4	2	1	1	2	0	0	1.96	6.0174	1	-7	1	2	3	31	25	30	15	2170	82	108	94	98	172	134	53	95	68	70	120	90	11
2739	0	0	0	0	0	0	0	0	0	0	0	0	0	0	4	2	18	4	4	1	1	2	0	0	3.2416	3.2375	1	6	1	2	3	33	21	37	15	1343	89	134	101	90	124	109	25	67	48	50	86	69	14
2743	0	0	0	0	0	0	0	0	0	0	0	0	0	0	2	1	55	2	1	2	1	3	0	0	2.0466	6.8063	1	5	1	2	3	41	22	29	13	4347	83	112	93	126	189	153	64	93	78	90	121	103	12
2760	0	1	0	0	0	0	0	0	0	0	0	0	0	0	4	2	35	4	2	1	1	3	0	0	2.9618	5.1875	0	5	1	4	4	37	27	29	15	6415	86	131	102	72	175	127	39	94	67	52	107	81	10
2766	0	0	0	0	0	0	0	0	0	0	0	0	0	0	4	2	29	2	4	1	1	2	0	0	8.1733	25.0813	0	-7	1	4	4	39	27	33	15	1469	107	148	130	90	170	113	49	91	62	64	112	78	13
2771	0	0	0	0	0	0	0	0	0	0	0	0	0	0	4	1	60	4	#NULL!	1	1	2	0	0	2.3366	6.2958	0	5	1	5	3	41	20	28	15	1800	53	81	67	88	158	119	32	83	48	53	105	71	11
2773	0	0	0	0	0	0	0	0	0	0	0	0	0	0	5	1	66	3	2	1	1	1	1	0	2.4966	8.0924	1	18	1	6	4	53	35	29	15	1495	88	105	98	90	114	103	36	57	46	56	73	65	20
2775	0	1	0	0	0	0	0	0	0	0	0	0	0	0	3	2	68	3	1	1	1	2	0	0	55.9821	59.6347	1	0	1	11	4	31	50	41	15	4125	78	113	91	64	191	108	47	92	66	55	129	82	1
2777	1	0	0	0	0	0	0	1	0	0	0	0	0	0	4	1	68	3	2	1	1	3	0	0	3.0205	9.8653	1	25	1	6	3	63	36	35	15	1496	72	126	90	88	168	127	27	91	68	47	113	85	10
2779	0	0	0	0	0	0	0	1	0	0	0	0	0	0	4	2	53	4	2	1	1	3	0	0	4.972	20.5667	1	25	1	11	3	70	50	33	13	517	57	89	71	86	152	122	36	87	59	49	90	74	8
2791	0	1	0	0	0	0	0	1	0	0	0	0	0	0	4	1	79	3	2	3	1	3	0	0	2.1571	5.0611	0	12	1	2	4	52	51	27	15	1605	96	121	107	93	152	120	53	90	67	63	90	76	17
2797	0	0	0	0	0	0	0	0	0	0	0	0	0	0	4	1	55	4	2	1	1	3	0	0	7.0659	9.8444	1	5	1	4	3	30	35	30	15	3410	51	96	68	97	147	119	52	78	64	66	102	83	19
2800	1	0	0	0	0	0	0	1	0	0	0	0	0	0	4	2	80	3	2	1	1	3	1	1	1.2267	0.9722	1	21	2	7	4	115	84	49	3	1990	37	104	81	59	153	122	17	58	38	31	87	66	12
2805	0	0	0	0	0	0	0	1	0	0	0	0	0	0	4	2	66	3	2	1	1	3	0	0	2.5998	5.7833	0	7	1	4	3	17	23	24	15	2840	85	108	95	96	145	119	48	78	64	64	100	83	21
2817	1	0	0	0	0	0	0	1	0	0	0	0	0	0	4	2	72	4	2	1	1	2	0	0	3.7812	10.5535	1	12	1	4	3	42	35	34	15	810	60	84	70	109	139	123	45	62	51	64	88	72	7
2823	0	0	0	0	0	0	0	1	0	0	0	0	0	0	3	2	78	3	4	1	1	3	0	0	1.1965	11.9882	1	24	1	7	3	73	33	31	9	1255	65	142	95	101	154	124	40	78	62	63	110	84	16
2825	0	0	0	0	0	0	0	1	0	0	0	0	0	0	2	2	37	4	2	2	1	2	1	1	0.9245	0.9375	1	13	1	14	3	121	61	50	15	0	76	127	97	41	167	100	38	87	68	39	94	76	11
2849	0	0	0	0	0	0	0	0	0	0	0	0	0	0	4	1	37	3	4	1	1	3	0	0	1.8055	5.0465	1	2	1	2	3	29	11	19	14	3090	76	100	85	87	106	95	38	59	49	50	67	60	8
2852	0	0	0	0	0	0	0	0	0	0	0	0	0	0	4	2	63	4	2	1	1	3	0	0	2.5068	3.6146	0	5	1	4	2	25	36	35	14	2835	65	85	73	73	104	93	31	65	47	45	75	62	12
2855	0	1	0	0	0	0	0	0	0	0	0	0	0	1	5	1	63	2	#NULL!	1	1	3	1	1	1.2801	1.1965	1	22	1	7	2	49	53	39	15	1178	60	162	90	102	170	145	42	77	55	69	99	85	14
2863	0	0	0	0	0	0	0	0	0	0	0	0	0	0	4	2	59	4	2	1	1	1	0	0	1.522	1.4361	1	12	1	4	4	66	54	40	15	855	127	138	132	85	108	95	33	58	45	53	72	62	15
2872	1	0	0	0	0	0	0	0	0	0	0	0	0	0	2	2	63	4	2	1	1	3	0	0	11.6636	14.0069	0	10	1	7	3	59	45	39	15	2280	94	148	120	111	167	140	61	96	81	78	118	101	14
2915	0	0	0	0	0	0	0	0	0	0	0	0	0	0	4	2	46	4	2	1	1	3	0	0	2.0292	2.0299	1	0	1	4	2	42	34	34	15	1385	87	124	104	95	126	112	45	88	58	63	101	76	10
2921	0	0	0	0	0	0	0	0	0	0	0	0	0	0	2	1	49	3	4	5	1	1	1	1	6.2724	6.1757	1	5	1	8	0	44	41	35	15	298	69	85	76	118	168	144	60	85	75	74	113	95	14
2925	0	0	0	0	0	0	0	0	0	0	0	0	0	0	4	1	22	4	4	1	1	3	0	0	4.8893	10.9604	0	16	1	3	4	63	32	39	15	2930	101	130	118	77	157	125	50	112	72	58	203	96	12
2947	0	0	0	0	0	0	0	1	0	0	0	0	0	0	4	1	36	3	2	1	1	1	0	0	4.5194	31.2465	0	12	1	6	3	51	41	40	15	1726	98	150	124	82	166	119	43	104	70	58	117	86	3
2953	0	0	0	0	0	0	0	0	0	0	0	0	0	0	4	1	39	2	#NULL!	1	1	1	0	0	10.9995	56.9875	1	-5	1	2	4	28	24	35	15	1272	91	118	102	97	138	121	62	90	75	78	110	94	12
2957	0	0	0	0	0	0	0	0	0	0	0	0	0	0	2	2	22	2	4	1	1	3	0	0	2.538	27.9583	1	0	1	3	4	28	23	22	15	600	85	113	94	105	130	117	49	67	57	70	83	77	18
2974	0	0	0	0	0	0	0	0	0	0	0	0	0	0	3	2	50	1	4	1	1	1	0	0	2.3739	26.316	0	0	1	2	3	27	24	28	15	2310	64	105	86	130	164	144	69	107	81	80	122	101	15
2984	0	1	0	0	0	0	0	0	0	0	0	0	0	0	4	1	56	4	2	1	1	3	0	0	5.6627	14.7361	0	5	1	6	4	45	26	31	14	1255	77	94	83	90	135	116	39	69	60	57	92	78	12
2993	0	0	0	0	0	0	0	1	0	0	0	0	0	0	2	1	47	4	2	1	1	1	0	0	17.6474	22.6618	0	11	2	6	3	67	43	45	6	1920	78	117	98	71	180	134	38	111	76	71	135	95	10
2997	0	0	0	0	0	0	0	0	0	0	0	0	0	0	4	2	69	4	2	2	1	1	0	0	1.8154	2.0111	0	#NULL!	1	2	0	35	30	24	13	3040	55	80	62	89	153	109	38	94	49	59	115	70	12
3013	0	1	0	0	0	0	0	0	0	0	0	0	0	0	4	2	66	3	2	1	1	3	1	0	0.7751	17.4514	1	19	1	4	1	34	45	32	15	445	73	84	78	92	124	102	49	61	55	63	82	71	12
3015	0	1	0	0	0	0	0	0	0	0	0	0	0	0	4	2	54	4	2	1	1	3	1	1	0.344	0.2347	1	28	1	14	4	104	55	47	15	12	80	95	86	54	106	82	16	54	35	29	71	51	27
3019	0	0	0	0	0	0	0	0	0	0	0	0	0	0	5	1	26	4	4	1	1	3	0	0	4.1145	54.2194	1	7	1	9	4	61	46	34	15	2070	71	123	92	89	124	107	56	81	67	67	95	80	18
3021	0	0	0	0	0	0	0	0	0	0	0	0	0	0	5	1	60	4	2	1	1	3	0	0	0.0742	9.6854	1	-3	1	4	1	35	22	17	#NULL!	#NULL!	#NULL!	#NULL!	#NULL!	#NULL!	#NULL!	#NULL!	#NULL!	#NULL!	#NULL!	#NULL!	#NULL!	#NULL!	#NULL!
3026	0	0	0	0	0	0	0	0	0	0	0	0	0	0	4	2	43	4	2	1	1	1	0	0	4.7609	19.2646	0	20	1	9	2	55	43	29	15	865	78	112	97	136	183	159	60	97	82	90	125	106	9
3036	0	0	0	0	0	0	0	0	0	0	0	0	0	0	4	2	40	2	2	1	1	1	0	0	3.0729	24.7903	0	11	1	2	3	45	31	35	14	1355	113	130	119	83	152	116	53	90	68	70	151	84	18
3044	0	0	0	0	0	0	0	0	0	0	0	0	0	0	4	2	53	4	2	1	1	1	0	0	2.0916	3.8833	0	-1	2	6	2	38	36	36	12	4100	79	141	102	89	160	117	50	81	67	63	106	83	12
3050	0	0	0	0	0	0	0	0	0	0	0	0	0	0	4	2	67	3	2	1	1	2	0	0	0.8725	4.7382	1	0	1	4	3	48	20	24	14	1820	62	85	69	104	150	122	46	75	61	24	103	79	13
3052	0	0	0	0	0	0	0	0	0	0	0	0	0	1	4	2	43	4	4	2	1	3	0	0	17.1254	31.9097	1	14	1	13	4	90	62	40	15	155	63	110	90	65	144	100	34	81	54	48	106	71	15
3056	0	1	0	0	0	0	0	0	0	0	0	0	0	0	4	1	77	3	#NULL!	1	1	3	0	0	9.0068	9.0069	1	17	1	9	2	62	45	36	15	#NULL!	63	78	67	101	153	126	32	57	40	51	90	66	19
3065	0	0	0	0	0	0	0	0	0	0	0	0	0	0	5	2	48	5	3	1	1	3	0	0	3.0335	3.0076	0	0	1	3	3	27	24	30	12	2247	82	109	97	121	167	141	58	89	73	80	113	95	17
3070	0	0	0	0	0	0	0	0	0	0	0	0	0	0	4	2	69	3	4	1	1	3	0	0	1.1732	5.0736	1	9	1	2	4	24	23	32	14	2245	84	104	94	89	119	105	43	73	59	63	86	74	19
3080	0	0	0	0	0	0	0	1	0	0	0	0	0	0	5	1	57	3	#NULL!	1	1	2	0	0	4.0802	11.1493	1	12	1	3	4	24	21	20	15	3147	83	100	92	95	135	112	56	79	65	70	127	84	12
3100	0	0	0	0	0	0	0	1	0	0	0	0	0	0	3	1	49	2	4	1	1	3	0	0	1.9796	4.9021	1	18	2	8	2	62	37	34	11	3040	44	64	53	93	137	116	33	93	62	53	108	80	10
3107	0	0	0	0	0	0	0	0	0	0	0	0	0	0	4	1	79	3	2	1	1	2	0	0	0.0613	33.2701	0	0	1	2	1	8	24	16	#NULL!	#NULL!	#NULL!	#NULL!	#NULL!	#NULL!	#NULL!	#NULL!	#NULL!	#NULL!	#NULL!	#NULL!	#NULL!	#NULL!	#NULL!
3108	0	0	0	0	0	0	0	0	0	0	0	0	0	0	4	1	69	3	#NULL!	1	1	1	0	0	11.0683	24.8451	1	3	2	4	4	68	39	36	7	1796	87	114	96	80	117	103	31	57	40	51	79	62	9
3123	1	0	0	0	0	0	0	1	0	0	0	0	0	0	4	2	76	3	4	2	1	3	0	0	1.1327	10.925	1	23	2	4	3	57	47	29	13	1945	60	73	64	92	120	107	30	55	46	51	70	61	14
3127	0	0	0	0	0	0	0	0	0	0	0	0	0	0	4	2	54	3	4	3	1	3	0	0	1.1362	3.9917	1	33	2	11	4	61	46	32	13	1419	66	95	76	75	120	96	38	71	56	46	116	66	9
3133	0	0	0	0	0	0	0	0	0	0	0	0	0	0	4	2	42	3	4	1	1	3	0	0	19.1905	36.7347	1	14	1	10	2	64	33	26	14	1865	84	102	92	87	119	105	28	66	49	48	78	68	13
3145	0	0	0	0	0	0	0	0	0	0	0	0	0	0	5	1	42	2	2	1	1	3	0	0	2.8715	14.8597	1	4	1	8	2	40	33	23	15	2555	87	119	98	78	137	104	41	123	62	53	154	79	13
3172	1	0	0	0	0	0	0	0	0	0	0	0	0	0	4	2	54	4	4	1	1	1	0	0	9.5046	18.2861	0	10	2	4	4	69	47	45	7	1550	61	118	79	94	168	129	47	83	62	63	140	88	12
3201	0	0	0	0	0	0	0	1	0	0	0	0	0	0	4	2	75	3	2	1	1	3	1	1	1.5525	3.4167	1	10	1	10	4	69	67	45	15	706	79	124	97	58	148	97	33	92	63	44	110	74	18
3205	0	0	0	0	0	0	0	0	0	0	0	0	0	0	4	1	48	4	2	1	1	2	1	1	7.5279	7.1979	1	15	1	6	4	72	53	35	15	375	103	157	123	62	141	106	45	87	67	52	108	81	7
3225	0	0	0	0	0	0	0	0	0	0	0	0	0	0	4	2	49	2	4	1	1	3	0	0	5.1809	8.0556	1	7	2	3	3	50	27	32	13	1205	109	145	125	88	128	108	63	91	76	69	101	83	21
3239	0	0	0	0	0	0	0	0	0	0	0	0	0	0	4	2	65	2	4	1	1	3	0	0	2.3415	15.8528	1	6	2	4	3	61	45	30	12	675	95	121	106	93	169	130	58	86	72	52	111	89	14
3250	0	0	0	0	0	0	0	1	0	0	0	0	0	0	4	1	68	4	2	2	1	3	1	0	1.0398	164.366	1	27	1	6	4	45	47	23	15	1750	58	102	77	87	123	100	48	68	57	61	79	67	13
3266	0	0	0	0	0	0	0	0	0	0	0	0	0	0	4	2	72	3	2	1	1	1	0	0	1.6851	16.5049	1	10	1	5	2	44	38	40	14	2332	53	85	66	131	204	166	29	52	43	56	93	79	16
3267	0	1	0	0	0	0	0	0	0	0	0	0	0	0	2	1	53	3	1	1	1	3	0	0	3.8325	27.8188	1	7	1	6	1	56	41	20	13	#NULL!	53	75	61	52	109	85	18	85	42	31	89	48	11
3283	0	0	0	0	0	0	0	0	0	0	0	0	0	0	4	2	74	4	2	1	1	2	0	0	1.7977	8.25	0	5	1	2	2	26	26	15	14	1880	72	89	82	134	170	155	58	73	67	83	107	97	17
3318	0	0	0	0	0	0	0	0	0	0	0	0	0	0	4	2	46	4	2	1	1	1	0	0	10.9922	17.391	0	7	1	5	3	60	24	33	6	1555	87	132	110	104	187	129	31	93	70	63	122	90	11
3337	0	0	0	0	0	0	0	0	0	0	0	0	0	0	5	1	75	3	4	1	1	2	0	0	0.9496	7.7521	0	0	1	5	1	27	43	37	13	1500	62	107	81	99	162	127	48	77	62	64	111	86	9
3361	0	0	0	0	0	0	0	1	0	0	0	0	0	1	4	2	36	4	2	1	1	3	1	1	5.2151	5.0965	1	15	1	6	4	81	40	44	14	1054	97	123	108	105	135	122	50	81	69	69	101	88	19
3370	0	0	0	0	0	0	0	0	0	0	0	0	0	1	4	1	46	2	1	1	1	3	0	0	32.3365	57.9479	0	3	1	12	4	107	49	39	15	967	62	162	107	81	142	100	40	69	55	57	91	70	20
3372	0	1	0	0	0	0	0	0	0	0	0	0	0	0	4	1	76	3	2	1	1	3	0	0	10.5453	21.0965	1	21	1	12	4	79	66	49	14	1241	45	105	70	65	201	128	26	126	45	38	135	72	16
3386	1	1	0	0	0	0	0	0	0	0	0	0	0	0	4	1	64	3	4	1	1	3	0	0	21.9477	46.6257	1	13	1	6	4	80	56	45	14	270	81	103	91	94	156	111	45	80	55	60	95	72	14
3389	1	1	0	0	0	0	0	0	0	0	0	0	0	0	5	2	63	3	4	1	1	3	1	1	2.3622	1.834	1	13	1	14	4	101	62	57	15	14	76	144	106	76	112	94	40	64	52	52	237	69	23
3390	0	1	0	0	0	0	0	1	0	0	0	0	0	0	4	1	18	4	4	1	1	3	0	0	4.9127	7.859	0	9	1	6	3	74	26	37	15	2740	110	148	124	87	129	110	38	81	65	34	100	81	21
3392	0	0	0	0	0	0	0	0	0	0	0	0	0	0	4	1	37	4	4	1	1	1	0	0	20.657	27.4097	1	19	1	6	3	33	18	32	15	1368	72	92	80	111	166	125	55	90	66	74	116	85	7
3393	0	1	0	0	0	0	0	0	0	0	0	0	0	0	4	1	68	4	2	3	1	3	1	1	2.7682	2.5736	1	22	1	5	3	40	43	35	15	690	97	124	110	87	129	101	46	77	56	61	94	71	18
3425	0	0	0	0	0	0	0	0	0	0	0	0	0	0	4	2	50	4	4	2	1	2	0	0	1.8645	12.1465	0	7	1	3	3	47	25	22	15	1470	100	122	110	79	123	98	51	90	62	60	94	75	13
3429	0	0	0	0	0	0	0	0	0	0	0	0	0	0	4	2	39	3	4	1	1	1	0	0	0.8395	2.0715	1	8	1	7	2	32	39	28	14	475	55	71	63	100	124	112	38	70	58	65	85	76	12
3435	0	0	0	0	0	0	0	1	0	0	0	0	0	0	4	2	56	4	2	1	1	3	0	0	1.8268	4.7444	1	29	1	8	3	18	27	36	14	3465	70	108	83	86	179	122	48	87	67	61	117	74	17
3437	0	0	0	0	0	0	0	0	0	0	0	0	0	0	4	2	49	2	4	3	1	2	1	1	8.5689	8.4069	1	4	1	2	4	56	32	30	15	1667	52	98	77	106	143	124	63	113	72	78	123	91	13
3442	0	0	0	0	0	0	0	0	0	0	0	0	0	0	4	1	39	4	2	1	1	3	0	0	3.015	5.1354	0	15	1	3	3	41	21	29	14	2530	113	131	120	84	110	99	42	86	59	57	92	72	11
3449	0	0	0	0	0	0	0	1	0	0	0	0	0	0	4	2	78	3	2	1	1	3	0	0	4.694	5.0132	1	14	1	4	3	51	26	24	15	1490	108	139	116	110	140	126	52	82	66	66	95	80	19
3456	0	1	0	0	0	0	0	0	0	0	0	0	0	0	4	1	52	4	1	1	1	3	0	0	2.8093	6.525	1	-7	1	4	1	42	21	18	15	3265	76	90	82	84	113	94	36	64	46	53	74	62	10
3459	0	0	0	0	0	0	0	1	0	0	0	0	0	0	5	1	48	2	4	1	1	3	0	0	2.8105	33.9319	0	16	1	2	4	81	38	31	14	5435	107	157	131	90	133	111	53	99	69	70	102	83	22
3460	0	0	0	0	0	0	0	0	0	0	0	0	0	0	4	2	65	4	4	2	1	1	0	0	1.5718	9.8563	0	4	1	9	2	39	33	29	15	1159	67	83	73	86	161	119	51	86	66	62	115	84	9
3491	0	1	0	0	0	0	0	0	0	0	0	0	0	0	4	1	44	2	#NULL!	1	1	3	0	0	7.9879	15.8576	1	9	1	9	3	63	44	35	14	5170	89	114	100	68	133	106	26	81	52	40	97	71	10
3495	0	0	0	0	0	0	0	0	0	0	0	0	0	0	4	1	57	4	1	1	1	3	0	0	0.9998	2.4917	0	11	1	3	2	38	22	29	15	2405	78	126	92	93	168	133	43	90	66	60	116	88	12
3497	0	0	0	0	0	0	0	0	0	0	0	0	0	0	4	2	58	4	2	1	1	2	0	0	1.1178	25.8451	1	10	1	3	2	28	22	21	14	2215	68	90	78	93	157	118	51	77	61	66	99	79	7
3501	1	0	0	0	0	0	0	0	0	0	0	0	0	0	2	2	73	3	4	1	1	3	0	0	1.0014	8.809	1	24	2	6	3	81	51	43	9	607	80	143	95	90	137	118	37	84	63	59	101	81	16
3516	0	1	0	0	0	0	0	1	0	0	0	0	0	0	5	2	76	3	2	2	1	3	0	0	1.9585	3.7688	1	6	1	2	3	21	27	21	15	3210	77	100	89	96	144	119	46	86	60	65	100	80	9
3542	0	1	0	0	0	0	1	0	0	0	0	0	0	0	4	1	58	4	#NULL!	1	1	3	0	0	3.5872	6.5035	0	8	2	7	4	48	29	36	13	1595	85	103	93	99	150	122	51	94	71	67	112	88	15
3543	0	0	0	0	0	0	0	0	0	0	0	0	0	0	4	2	61	4	2	2	1	2	0	0	0.6461	4.8667	0	6	1	5	3	45	31	33	15	100	74	98	81	100	136	115	39	76	48	61	84	70	11
3547	1	0	0	0	0	0	0	0	0	0	0	0	0	0	1	2	50	2	2	1	1	1	0	0	4.0758	10.1028	0	13	1	3	2	26	30	30	15	2120	94	132	114	92	174	127	62	88	77	70	292	96	13
3551	0	0	0	0	0	0	0	0	0	0	0	0	0	0	4	1	80	3	2	1	1	3	0	0	1.1768	1.8319	0	6	1	5	3	32	36	43	14	2305	71	102	84	96	159	140	26	69	49	49	90	79	12
3556	0	0	0	0	0	0	0	0	0	0	0	0	0	0	4	2	74	3	1	1	1	2	0	0	2.9645	51.8389	0	3	1	2	4	26	39	34	15	2442	62	115	80	88	153	112	47	81	61	61	98	79	10
3565	0	0	0	0	0	0	0	0	0	0	0	0	0	0	4	2	66	3	2	1	1	3	0	0	2.9654	2.966	1	5	1	5	3	34	34	22	15	2067	80	96	88	98	146	118	57	85	66	65	89	78	16
3567	0	1	0	0	0	0	0	0	0	0	0	0	0	1	5	1	68	3	2	1	1	3	1	1	1.483	0.8917	1	26	2	16	4	105	74	49	9	159	112	137	126	91	122	104	33	83	55	58	94	72	11
3574	0	0	0	1	0	0	0	0	0	0	0	0	0	0	4	1	73	3	4	1	1	2	0	0	1.3622	6.2708	0	5	1	3	4	43	32	34	14	1394	83	138	112	61	143	116	43	85	62	54	105	80	14
3577	1	0	0	0	0	0	1	1	0	0	0	0	0	0	5	2	54	5	2	1	1	3	1	1	20.9663	20.7403	1	24	1	8	4	68	53	46	15	1554	91	129	106	77	149	102	33	77	51	48	101	67	17
3593	1	0	0	0	0	0	0	0	0	0	0	0	0	0	2	1	70	3	1	2	1	3	1	1	3.292	2.3979	1	19	2	12	3	93	63	40	11	#NULL!	68	128	94	54	121	89	21	91	39	32	101	56	12
3600	0	0	0	0	0	0	0	0	0	0	0	0	0	0	4	1	62	4	2	1	1	3	0	0	10.8354	10.8389	1	14	1	4	4	38	41	47	15	554	113	135	121	87	128	106	45	74	59	61	90	75	18
3602	0	0	0	0	0	0	0	0	0	0	0	0	0	0	5	1	58	4	2	1	1	3	0	0	1.0513	12.0299	0	8	1	3	4	52	30	27	15	2990	89	113	104	93	125	117	36	60	49	61	82	72	18
3622	0	0	0	0	0	0	0	1	0	0	0	0	0	0	4	1	52	4	4	1	1	3	0	0	3.4071	5.416	0	3	1	4	3	21	29	27	15	2871	69	88	81	95	141	113	40	73	53	61	96	73	14
3631	0	0	0	0	0	0	0	0	0	0	0	0	0	0	2	1	79	3	#NULL!	1	1	2	0	0	1.8454	5.5396	0	16	1	4	4	33	33	30	14	2195	77	105	91	113	160	136	44	87	61	67	105	86	13
3641	0	0	0	0	0	0	0	0	0	0	0	0	0	0	4	1	78	3	3	1	1	3	0	0	15.3539	15.3542	1	1	1	2	4	31	37	42	15	1193	73	113	87	92	183	128	49	108	67	65	133	89	14
3647	0	1	0	0	0	0	0	0	0	0	0	0	0	0	4	1	26	4	4	1	1	3	0	0	2.7872	7.7472	0	0	1	2	2	32	17	18	15	1660	89	111	101	107	136	119	58	92	65	76	107	83	16
3649	0	1	0	0	0	0	0	0	0	0	0	0	0	0	4	2	52	2	4	2	1	1	1	0	4.6237	64.6722	1	25	1	5	4	49	40	28	15	738	73	94	86	95	150	117	48	83	60	64	112	79	14
3654	0	0	0	0	0	0	0	0	0	0	0	0	0	0	3	2	44	4	4	1	1	1	0	0	20.2321	44.9014	0	16	1	3	4	25	17	43	14	7540	61	111	73	117	190	145	37	103	72	21	295	97	9
3666	0	0	0	0	0	0	0	0	0	0	0	0	0	0	4	2	59	4	2	1	1	3	0	0	2.8219	29.2465	0	5	1	4	4	23	24	24	15	2140	94	118	108	81	142	113	43	68	56	56	92	74	13
3670	0	0	0	0	0	0	0	0	0	0	0	0	0	0	4	2	46	2	#NULL!	1	1	2	0	0	0.7775	5.4917	0	0	1	9	2	24	24	31	14	2635	61	88	79	118	169	143	63	95	75	84	116	97	14
3676	1	1	0	0	0	0	0	1	0	0	0	0	0	0	4	1	68	3	4	1	1	1	0	0	8.9876	14.6868	1	17	1	7	4	67	54	42	15	893	88	108	96	81	137	108	26	80	62	46	97	77	11
3683	0	1	0	0	0	0	0	0	0	0	0	0	0	0	4	2	47	4	2	1	1	3	0	0	32.5274	129.96	1	11	2	19	4	187	110	50	3	262	124	158	139	94	128	112	42	76	53	60	87	73	32
3685	1	0	0	0	0	0	0	0	0	0	0	0	0	0	2	2	40	4	4	2	1	3	0	0	3.0961	37.9035	1	13	1	3	2	46	38	33	14	1290	95	127	114	111	138	122	65	92	80	75	106	91	20
3694	0	0	0	0	0	0	0	0	0	0	0	0	0	0	4	1	63	3	1	1	1	1	0	0	13.9704	21.7174	0	0	1	6	3	58	50	43	15	828	82	124	110	66	158	111	32	117	63	49	136	78	9
3695	1	0	1	0	0	0	0	1	0	0	0	0	0	0	4	2	66	3	2	1	1	3	0	0	21.7735	21.7611	0	17	1	7	4	45	47	49	15	0	75	103	87	82	176	109	40	94	56	54	121	73	16
3705	0	0	0	0	0	0	0	0	0	0	0	0	0	0	4	2	62	3	4	2	1	3	1	1	5.8343	5.7993	1	14	1	9	3	69	60	45	15	409	70	108	84	67	146	101	21	69	42	45	96	62	12
3707	0	0	0	0	0	0	0	0	0	0	0	0	0	0	4	2	77	3	#NULL!	1	1	2	0	0	1.1634	13.0743	1	5	1	3	3	42	18	16	15	1825	58	92	73	102	188	126	27	68	42	51	96	68	12
3727	0	0	0	0	0	0	0	0	0	0	0	0	0	0	3	1	44	2	4	1	1	3	0	0	4.2889	50.8222	0	15	1	4	4	62	44	31	14	4150	84	125	99	77	129	96	31	71	46	47	87	63	16
3728	0	0	0	0	0	0	0	0	0	0	0	0	0	0	4	2	62	3	#NULL!	2	1	3	0	0	1.5107	23.9521	1	10	1	2	4	59	28	33	15	1775	82	142	103	105	148	132	38	59	48	60	85	76	17
3729	0	0	0	0	0	0	0	0	0	0	0	0	0	0	4	1	67	4	1	1	1	2	0	0	11.0037	20.1451	0	0	1	5	2	43	30	29	15	2440	71	83	78	122	198	155	41	79	58	62	121	87	14
3732	0	1	0	0	0	0	0	0	0	0	0	0	0	0	5	1	77	3	#NULL!	1	1	3	0	0	1.1771	15.0451	0	-2	1	2	2	36	23	18	14	2277	60	99	71	71	130	98	18	72	40	42	90	59	12
3742	1	0	0	0	0	0	0	0	0	0	0	0	0	0	4	2	49	4	4	1	1	1	0	0	1.6555	9.25	1	5	1	3	1	25	23	9	15	2520	68	88	79	78	116	90	38	71	55	55	79	67	13
3765	0	0	0	0	0	0	0	0	0	0	0	0	0	0	3	1	77	2	2	2	1	1	0	0	24.1586	25.8799	1	5	1	3	3	38	37	49	14	956	85	119	106	86	152	107	30	126	50	55	135	69	4
3768	1	0	0	0	0	0	0	0	0	0	0	0	0	0	4	2	68	3	2	1	1	2	0	0	11.9411	22.9069	1	28	1	4	3	47	45	44	15	1166	92	129	103	81	229	110	25	82	50	47	129	69	20
3786	0	0	0	0	0	0	0	0	0	0	0	0	0	0	5	2	63	3	4	1	1	1	0	0	15.1148	17.8292	1	11	1	11	4	73	58	47	15	1669	86	107	96	55	132	89	42	72	56	41	115	69	4
3790	0	0	0	0	0	0	0	0	0	0	0	0	0	0	4	1	65	3	#NULL!	1	1	1	0	0	0.9469	8.8694	1	14	1	3	1	27	27	25	14	615	66	83	75	104	136	119	50	65	59	70	84	77	13
3796	0	0	0	0	0	0	1	1	0	0	0	0	0	0	4	1	60	4	2	1	1	3	0	0	1.8274	4.5229	0	10	1	4	3	38	21	34	15	2665	72	103	83	76	140	102	51	99	69	59	113	80	8
3800	1	0	0	0	0	0	0	0	0	0	0	0	0	0	4	1	78	3	#NULL!	1	1	2	0	0	0.9669	17.6069	1	3	1	2	1	22	29	23	12	2005	42	87	61	130	177	162	48	78	63	74	112	97	11
3820	0	1	0	0	0	0	0	0	0	0	0	0	0	0	4	2	72	3	4	1	1	3	0	0	1.5361	3.0396	0	5	1	4	3	46	33	34	14	2220	68	120	85	95	135	111	39	88	53	58	99	72	16
3824	0	0	0	0	0	0	0	0	0	0	0	0	0	0	4	1	76	3	#NULL!	1	1	3	0	0	1.4151	15.6132	1	16	1	3	3	53	38	28	15	912	73	97	87	113	150	132	38	70	49	64	92	77	13
3826	0	1	0	0	0	0	0	0	0	0	0	0	0	0	5	1	37	2	4	1	1	3	1	1	8.7795	8.7479	1	11	1	10	4	107	55	46	15	323	88	118	107	80	137	104	31	81	48	53	100	66	23
3835	0	1	0	0	0	0	0	0	0	0	0	0	0	0	2	2	74	3	#NULL!	1	1	3	0	0	2.2699	5.4347	1	5	1	5	3	54	41	38	7	4090	81	109	96	128	193	161	48	78	64	75	112	96	13
3839	0	0	0	0	0	0	0	0	0	0	0	0	0	1	4	1	58	4	2	1	1	3	0	0	2.7864	7.7903	1	8	1	5	3	30	38	26	15	750	98	116	107	94	140	109	47	74	59	63	96	76	14
3841	0	1	0	0	0	0	0	0	0	0	0	0	0	0	4	2	66	3	2	1	1	3	1	1	21.6699	21.6139	1	5	1	9	2	39	51	46	15	#NULL!	35	123	67	68	142	100	32	67	42	45	85	61	5
3851	0	0	0	0	0	0	0	0	0	0	0	0	0	0	4	2	63	4	1	1	1	1	0	0	0.0927	31.5625	1	0	1	4	3	27	31	30	15	120	93	93	93	160	175	168	97	109	103	119	119	119	15
3855	0	0	0	0	0	0	0	0	0	0	0	0	0	0	4	1	52	4	2	1	1	1	0	0	4.4557	8.3819	0	0	1	5	4	43	21	29	14	2970	74	113	92	86	143	102	41	89	55	54	106	72	15
3860	0	1	1	0	0	0	0	0	0	0	0	0	0	1	4	1	58	3	4	4	1	3	1	1	1.8279	1.7701	1	17	1	10	4	77	42	34	15	#NULL!	97	125	108	79	134	93	39	63	48	53	91	65	10
3865	0	0	0	0	0	0	0	0	0	0	0	0	0	0	4	2	75	3	1	1	1	3	0	0	1.0008	6.7201	1	3	2	6	4	53	46	32	12	2380	62	96	75	67	190	119	39	78	52	50	103	74	16
3866	1	0	0	0	0	0	0	1	0	0	0	0	0	0	2	2	48	3	2	1	1	1	0	0	14.2104	48.5528	1	36	2	8	3	90	56	46	8	503	89	107	97	79	145	113	38	83	50	52	102	71	14
3876	0	0	0	0	0	0	0	1	0	0	0	0	0	0	4	2	48	4	4	1	1	1	0	0	2.3257	13.0986	0	7	1	3	2	46	34	20	15	3685	69	89	76	78	121	106	36	62	53	53	81	71	13
3882	0	1	0	0	0	0	0	0	0	0	0	0	0	0	1	1	31	1	4	1	1	3	0	0	1.8654	3.6229	0	-2	1	2	4	45	18	34	15	2830	84	139	115	80	134	99	40	87	56	54	97	70	16
3891	0	1	1	0	0	0	0	0	0	0	0	0	0	1	2	2	30	4	1	1	1	3	0	0	20.6922	25.3771	0	19	2	18	3	137	85	63	3	249	90	128	116	53	149	95	26	116	65	41	239	78	18
3892	0	0	0	0	0	0	0	0	0	0	0	0	0	0	4	2	51	2	4	1	1	3	0	0	1.5841	7.7833	0	25	1	5	4	37	44	28	14	970	62	106	73	89	112	100	49	75	62	62	84	71	17
3895	0	1	0	0	0	0	0	1	0	0	0	0	0	0	2	1	74	3	4	1	1	1	0	0	15.236	21.1076	1	18	1	4	4	34	40	25	15	1933	95	119	104	63	147	107	35	68	55	57	156	75	18
3915	0	1	0	0	0	0	0	1	0	0	0	0	0	0	2	2	68	3	4	1	1	3	1	1	0.3822	-0.1882	1	23	1	5	0	35	28	17	#NULL!	#NULL!	#NULL!	#NULL!	#NULL!	#NULL!	#NULL!	#NULL!	#NULL!	#NULL!	#NULL!	#NULL!	#NULL!	#NULL!	#NULL!
3917	0	0	0	0	0	0	0	1	0	0	0	0	0	0	4	2	47	2	4	3	1	3	0	0	1.0884	8.1063	0	8	1	7	2	44	42	30	14	350	63	112	85	65	149	107	48	100	70	51	103	75	16
3920	1	0	0	0	0	0	0	0	0	0	0	0	0	0	1	2	78	3	2	1	1	3	0	0	1.9043	30.8118	1	24	1	8	3	65	35	38	14	10	60	75	69	101	145	128	56	79	63	63	92	78	8
3927	0	0	0	0	0	0	0	1	0	0	0	0	0	0	5	1	53	4	2	1	1	1	0	0	12.2542	31.116	0	23	1	9	4	67	33	36	15	2804	80	125	95	77	129	102	45	77	60	58	93	74	17
3929	0	0	0	0	0	0	0	1	0	0	0	0	0	0	4	2	57	3	2	4	1	3	0	0	1.0604	7.6632	1	17	1	5	3	59	31	26	15	1540	78	105	91	110	181	147	30	88	55	65	109	86	9
3939	0	0	0	0	0	0	0	1	0	0	0	0	0	0	4	1	68	3	2	2	1	1	0	0	1.8431	5.4375	1	24	2	9	3	54	41	23	12	1483	72	98	86	80	141	111	42	81	66	52	96	76	14
3947	0	0	0	0	0	0	0	0	0	0	0	0	0	0	4	2	55	4	2	1	1	1	0	0	1.7149	7.6743	0	18	1	8	3	34	32	34	14	1630	91	121	105	110	232	162	67	132	88	87	166	112	14
3949	1	0	0	0	0	0	0	0	0	0	0	0	0	0	3	1	71	3	1	1	1	3	0	0	2.6684	5.6507	1	15	2	3	3	73	42	38	13	1050	90	156	110	82	113	98	17	71	50	45	82	66	15
3965	0	0	0	0	0	0	0	0	0	0	0	0	0	0	4	1	50	4	2	1	1	3	0	0	2.9047	15.9007	1	17	2	3	4	39	55	29	8	3545	74	125	96	99	149	126	51	93	78	70	113	95	12
3968	0	0	0	0	0	0	0	0	0	0	0	0	0	0	4	2	56	3	2	1	1	1	0	0	1.9064	8.9	0	4	1	6	3	35	28	31	15	1995	80	128	107	119	169	141	68	96	81	88	119	101	12
3969	0	1	1	0	0	0	0	1	0	0	0	0	0	0	2	1	66	3	2	4	1	3	1	1	9.619	9.4806	1	27	1	2	4	66	53	39	15	2130	82	134	107	65	147	104	29	122	53	38	112	61	15
3977	0	1	0	0	0	0	0	0	0	0	0	0	0	0	4	1	50	3	4	11	1	3	1	1	1.8696	0.8167	1	5	1	11	3	66	32	42	14	1095	119	141	131	73	149	93	39	103	59	47	112	66	18
3982	0	0	0	0	0	0	0	0	0	0	0	0	0	0	4	1	64	1	2	1	1	1	0	0	16.8086	29.9451	0	-1	1	5	3	55	56	43	15	755	106	161	122	64	193	90	32	109	56	45	136	69	12
3984	0	0	0	0	0	0	0	0	0	0	0	0	0	0	4	2	47	3	1	1	1	3	0	0	13.7352	22.0438	1	5	1	5	3	44	56	35	11	1810	92	147	113	78	154	110	46	97	57	59	112	75	11
3995	0	0	0	0	0	0	1	1	0	0	0	0	0	0	4	2	75	4	2	2	1	1	0	0	10.135	20.2257	0	15	1	4	4	36	26	29	15	1155	89	112	99	83	166	115	42	68	51	56	97	71	11
4002	0	0	0	0	0	0	0	0	0	0	0	0	0	0	4	2	60	4	2	1	1	1	0	0	6.081	13.0472	1	11	2	4	2	41	43	42	10	1735	76	123	92	86	135	108	47	81	65	62	98	79	14
4004	0	0	0	0	0	0	0	0	0	0	0	0	0	0	4	1	51	4	2	1	1	1	0	0	13.54	46.5847	0	0	1	11	3	77	52	36	15	1071	73	127	89	82	148	104	28	79	57	48	102	74	12
4005	0	1	0	0	0	0	0	0	0	0	0	0	0	0	5	2	61	4	2	1	1	3	0	0	2.2223	13.0722	1	20	1	8	4	62	50	26	15	1576	72	113	90	91	125	102	51	71	60	66	88	74	12
4038	0	1	0	0	0	0	0	1	0	0	0	0	0	0	4	1	57	4	2	1	1	3	0	0	2.9253	11.7847	0	21	1	7	3	53	29	26	15	2475	63	86	73	86	154	116	39	67	52	50	87	67	8
4060	0	0	0	0	0	0	0	0	0	0	0	0	0	0	4	2	20	1	4	1	1	2	0	0	1.9494	1.9382	0	0	1	2	3	28	27	31	13	1985	64	93	70	96	124	112	32	65	45	58	81	67	9
4096	0	0	0	0	0	0	0	1	0	0	0	0	0	0	2	2	79	3	4	1	1	1	0	0	1.0524	16.841	0	22	1	3	3	31	28	23	14	1760	70	92	80	101	176	142	42	70	57	64	106	86	15
4103	0	0	0	0	0	0	0	0	0	0	0	0	0	0	4	2	72	3	2	1	1	3	0	0	1.3415	2.2083	0	-6	2	2	2	36	33	29	13	1930	59	85	73	90	117	105	44	61	54	60	79	71	13
4109	0	1	0	0	0	0	0	0	0	0	0	0	0	0	5	2	69	4	4	2	1	3	0	0	2.2735	9.2167	0	11	1	5	2	39	41	37	15	1205	72	96	86	91	137	115	28	84	67	51	98	83	6
4127	0	0	0	0	0	0	0	0	0	0	0	0	0	0	2	2	42	2	4	1	1	3	0	0	2.7762	14.7132	1	9	2	3	3	28	30	35	11	3080	75	109	88	96	201	113	47	81	58	64	121	76	10
4136	1	0	0	0	0	0	1	1	0	0	0	0	0	0	4	1	79	3	2	1	1	3	0	0	10.8404	15.2431	1	12	1	5	2	28	32	29	15	4495	62	86	73	99	197	146	42	106	58	59	122	89	11
4137	0	1	0	0	0	0	0	0	0	0	0	0	0	0	4	2	52	2	4	1	1	3	0	0	4.6992	7.6924	0	7	1	7	3	57	34	38	15	1385	77	121	91	81	132	102	51	90	71	19	102	81	6
4140	0	1	0	0	0	0	0	1	0	0	0	0	0	0	4	1	68	3	2	1	1	3	1	1	3.973	3.8625	1	19	1	2	3	49	49	38	15	915	100	146	117	89	129	108	46	87	57	61	99	74	13
4144	0	0	0	0	0	0	0	0	0	0	0	0	0	0	4	2	52	2	4	1	1	2	0	0	0.6231	4.7528	1	-3	1	2	2	36	36	27	14	2790	47	72	60	40	149	109	24	72	52	33	97	71	9
4148	0	0	0	0	0	0	0	0	0	0	0	0	0	0	5	1	29	4	2	1	1	3	0	0	8.6448	43.5785	0	0	1	8	4	73	33	38	14	2373	101	149	124	88	141	109	54	93	72	69	237	91	13
4155	0	0	0	0	0	0	0	1	0	0	0	0	0	0	4	1	80	3	#NULL!	2	1	3	0	0	1.1996	7.0021	1	10	1	2	2	37	32	26	15	1300	80	81	80	74	136	103	29	72	42	46	92	62	14
4169	1	1	0	0	0	0	0	0	0	0	0	0	0	0	4	2	67	3	4	1	1	3	0	0	6.6423	9.4063	1	15	1	8	4	73	65	48	15	905	86	129	101	61	157	95	32	96	64	50	115	76	14
4184	0	0	0	0	0	0	0	0	0	0	0	0	0	0	4	2	56	4	2	1	1	3	0	0	1.7732	1.7597	0	-4	1	3	4	47	29	29	8	4730	78	117	97	116	175	145	56	101	77	79	123	99	16
4187	0	0	0	0	0	0	0	0	0	0	0	0	0	0	4	2	46	4	2	2	1	1	0	0	3.8275	11.1139	0	5	1	7	4	70	37	30	15	1492	89	170	117	83	158	113	41	88	62	57	108	77	11
4230	1	0	0	0	0	0	0	1	0	0	0	0	0	0	4	2	73	3	#NULL!	1	1	3	0	0	6.4448	6.4104	1	16	1	2	2	32	32	21	15	3770	70	107	78	97	129	115	41	71	56	66	90	76	13
4235	0	0	0	0	0	0	0	0	0	0	0	0	0	0	2	1	49	2	4	1	1	3	0	0	17.9509	22.6069	1	12	1	4	3	25	46	22	15	4450	50	106	72	78	153	104	50	85	62	62	106	77	12
4245	0	0	0	0	0	0	0	1	0	0	0	0	0	0	4	1	48	4	2	1	1	3	1	1	3.3394	68.1806	1	7	2	15	4	122	94	50	13	123	15	120	96	79	140	109	43	106	65	55	117	80	22
4271	0	0	0	0	0	0	0	0	0	0	0	0	0	0	4	2	44	4	2	1	1	3	0	0	2.0133	9.359	0	16	1	6	3	38	13	20	15	1018	74	87	81	106	137	121	41	66	57	66	88	78	12
4277	0	0	0	0	0	0	0	0	0	0	0	0	0	0	5	1	52	4	2	1	1	3	0	0	2.9001	2.9146	1	7	1	2	2	30	18	33	13	2640	76	98	87	102	141	113	30	79	49	57	100	70	12
4290	0	1	0	0	0	0	0	0	0	0	0	0	0	0	2	1	26	2	4	1	1	3	0	0	9.2482	28.7785	1	3	2	4	3	72	36	37	6	2575	90	117	103	82	135	113	36	81	57	51	90	75	14
4292	0	0	0	0	0	0	0	1	0	0	0	0	0	0	4	2	72	3	4	3	1	1	0	0	0.6866	2.884	0	12	1	5	1	65	57	30	15	50	52	60	55	87	152	121	55	98	78	66	109	90	9
4313	0	0	0	0	0	0	0	0	0	0	0	0	0	0	2	2	29	2	4	1	1	3	0	0	1.0663	4.059	0	5	1	4	3	53	18	23	15	1000	83	100	92	129	182	161	70	124	94	81	130	109	13
4317	0	0	0	0	0	0	0	0	0	0	0	0	0	0	5	1	35	3	2	1	1	3	0	0	19.81	19.8111	0	-7	1	4	4	57	21	44	15	2153	94	147	109	76	151	103	29	84	51	46	106	69	23
4332	0	0	0	0	0	0	0	0	0	0	0	0	0	0	4	1	29	4	#NULL!	1	1	2	0	0	13.3504	23.2722	0	-11	1	7	4	49	27	42	15	2385	99	130	117	72	130	109	53	92	76	60	104	87	12
4338	1	0	0	0	0	0	0	0	0	0	0	0	0	0	4	2	77	3	4	1	1	3	0	0	6.5114	9.5806	1	5	1	6	3	40	46	31	15	2005	53	111	73	82	174	111	44	76	55	61	107	72	14
4346	0	0	0	0	0	0	0	0	0	0	0	0	0	0	4	1	38	4	2	1	1	3	0	0	19.136	26.7924	0	-2	1	5	4	60	27	36	15	1095	61	120	83	88	135	100	39	100	60	57	112	74	9
4351	0	0	0	0	0	0	0	1	0	0	0	0	0	0	4	2	78	3	2	2	1	1	1	0	6.6488	6.766	1	10	1	4	4	50	37	44	8	1170	62	109	80	124	185	143	10	80	50	55	109	81	19
4367	0	0	0	0	0	0	0	0	0	0	0	0	0	0	2	1	60	2	#NULL!	1	1	1	0	0	2.783	29.9597	0	1	1	4	3	45	18	31	14	4780	81	116	97	110	186	139	50	80	68	1	116	90	14
4378	0	0	0	0	0	0	0	0	0	0	0	0	0	0	5	1	68	3	4	1	1	1	0	0	6.7008	13.7653	0	22	1	10	2	57	34	29	15	2760	73	109	94	95	123	107	44	57	50	58	74	66	14
4390	0	1	0	0	0	0	1	1	0	0	0	0	0	0	5	1	65	3	1	2	1	3	0	0	1.2216	7.8667	0	15	1	2	3	16	23	34	15	4050	81	105	95	99	159	135	52	116	72	67	119	87	4
4394	0	0	0	0	0	0	0	0	0	0	0	0	0	0	2	1	56	1	2	2	1	3	0	0	4.1753	4.1597	1	8	2	10	3	83	48	55	6	39	85	107	95	84	118	99	30	60	46	46	74	59	10
4397	1	1	0	0	0	0	0	0	0	0	0	0	0	0	4	1	58	3	4	1	1	3	0	0	3.6878	3.6639	1	10	2	9	3	72	39	30	11	1840	92	125	114	78	128	104	34	75	50	54	93	68	12
4403	0	1	0	0	0	0	0	0	0	0	0	0	0	0	4	1	72	3	3	1	1	3	0	0	3.5185	5.666	0	-3	1	5	1	30	32	25	14	2630	47	71	59	91	119	108	34	56	45	49	70	60	14
4405	0	0	0	0	0	0	0	0	0	0	0	0	0	0	4	1	49	3	4	2	1	3	0	0	4.1365	11.2604	1	15	2	9	3	49	36	38	11	1190	79	121	97	87	155	119	51	94	71	64	118	87	14
4429	0	0	0	0	0	0	0	0	0	0	0	0	0	0	4	1	61	3	#NULL!	1	1	3	0	0	2.1659	2.1632	0	-2	1	2	3	57	31	34	15	1480	65	97	75	92	119	104	18	57	47	46	73	66	5
4439	0	0	0	0	0	0	0	0	0	0	0	0	0	0	4	1	44	2	4	1	1	1	0	0	1.8628	6.0972	0	11	1	6	2	41	33	25	15	2318	80	109	96	123	150	137	50	91	76	87	113	97	8
4448	0	0	0	0	0	0	0	0	0	0	0	0	0	0	4	1	49	3	#NULL!	2	1	3	0	0	1.8936	6.6125	1	0	1	2	4	44	35	31	15	1600	71	111	90	123	205	154	65	108	85	88	147	111	12
4461	0	0	0	0	0	0	0	0	0	0	0	0	0	0	5	2	53	4	2	1	1	3	0	0	27.7671	27.7694	0	17	1	3	4	36	44	37	15	840	89	122	98	80	211	125	62	135	83	70	153	98	19
4467	0	0	0	0	0	0	1	0	0	0	0	0	0	0	4	2	73	3	1	1	1	3	0	0	2.3685	20.3194	0	10	1	5	4	33	40	38	15	1520	80	104	92	68	128	98	31	96	69	43	168	83	20
4479	0	1	0	0	0	0	0	0	0	0	0	0	0	0	2	1	80	3	2	1	1	1	1	1	0.5347	40.4132	1	14	2	13	4	115	72	47	7	0	44	99	72	27	150	96	18	57	41	12	88	57	6
4527	0	1	0	0	0	0	0	0	0	0	0	0	0	0	5	2	57	3	4	2	1	3	1	0	1.8362	5.7	1	0	1	2	4	66	38	50	15	974	102	144	112	93	134	116	34	86	58	54	102	77	26
4529	0	0	0	0	0	0	0	0	0	0	0	0	0	0	5	2	73	3	2	1	1	3	0	0	0.6748	2.9458	1	0	1	2	2	31	36	24	11	3020	65	84	75	136	163	147	58	82	66	87	100	93	18
4588	0	1	0	0	0	0	0	0	0	0	0	0	0	0	4	2	37	3	4	1	1	3	0	0	16.0703	17.8875	0	7	1	7	4	72	33	43	15	1608	100	131	116	71	122	100	47	76	63	57	91	76	7
4593	0	0	0	0	0	0	0	0	0	0	0	0	0	0	5	2	41	5	#NULL!	1	1	3	0	0	4.7187	6.284	0	-7	1	2	3	48	31	45	13	4890	91	132	111	103	152	126	33	71	50	58	94	75	12
4594	0	0	0	0	0	0	0	0	0	0	0	0	0	0	4	2	53	2	4	1	1	3	1	0	4.1579	6.1563	1	23	2	13	4	90	76	32	8	1925	62	119	81	95	140	113	53	78	66	68	96	82	11
4599	0	0	0	0	0	0	0	1	0	0	0	0	0	0	4	2	47	2	4	2	1	2	0	0	24.8658	40.6451	0	10	1	8	3	62	29	24	14	1000	96	122	107	129	190	147	71	92	81	94	123	106	10
4606	0	0	0	0	0	0	0	0	0	0	0	0	0	0	5	2	72	3	2	1	1	3	0	0	4.2203	5.1528	0	3	1	7	4	57	55	33	15	3345	56	104	80	76	148	94	31	76	45	47	100	61	14
4613	0	0	0	0	0	0	0	1	0	0	0	0	0	0	4	1	72	3	2	1	1	3	1	1	0.6714	8.5021	1	13	1	8	4	85	69	29	3	#NULL!	57	107	96	161	178	170	69	75	72	100	109	105	13
4630	0	1	0	0	0	0	0	0	0	0	0	0	0	0	2	2	56	3	#NULL!	1	1	1	0	0	27.0889	27.0896	1	0	1	6	4	56	28	45	15	1119	94	131	120	100	148	121	54	75	63	67	94	80	12
4633	0	0	0	0	0	0	0	0	0	0	0	0	0	0	4	2	67	4	2	1	1	3	0	0	6.2416	8.8	1	15	1	8	4	82	51	31	15	430	75	91	81	80	111	97	40	59	46	55	72	63	7
4637	0	0	0	0	0	0	0	0	0	0	0	0	0	0	2	2	64	5	4	1	1	3	0	0	2.0635	4.0333	0	10	1	4	4	49	29	29	15	2155	65	91	77	114	163	135	42	90	61	69	104	86	18
4644	1	1	0	0	0	0	0	1	0	0	0	0	0	0	4	1	70	3	2	1	1	3	0	0	38.7611	38.7514	1	20	1	5	2	34	32	39	14	1300	72	82	77	90	132	103	32	67	50	52	132	69	14
4655	0	1	0	0	0	0	0	0	0	0	0	0	0	0	4	1	39	3	2	4	1	3	0	0	4.2874	8.4389	1	8	2	12	3	73	37	36	11	46	53	78	66	58	129	104	42	89	65	47	99	75	10
4657	0	1	0	0	0	0	0	1	0	0	0	0	0	0	5	1	77	4	2	1	1	3	1	1	9.6916	9.6278	1	12	1	11	4	87	68	53	15	0	72	139	94	69	118	102	27	65	42	41	72	62	9
4669	0	0	0	0	0	0	0	1	0	0	0	0	0	0	3	2	51	3	4	1	1	1	0	0	3.1214	20.6229	0	19	1	6	3	57	40	29	14	3135	68	103	79	98	133	116	54	77	68	34	98	85	11
4678	0	1	0	0	0	0	0	0	0	0	0	0	0	0	2	1	58	3	2	1	1	3	0	0	1.9925	3.9583	0	5	1	5	4	57	36	33	15	459	87	115	96	106	156	132	40	77	53	67	92	79	15
4679	0	1	0	0	0	0	0	0	0	0	0	0	0	0	4	1	67	4	#NULL!	1	1	1	0	0	11.7354	16.4403	0	1	1	11	4	76	54	47	15	2184	75	127	89	80	145	107	32	95	56	49	246	75	14
4688	0	0	0	0	0	0	0	1	0	0	0	0	0	0	4	2	57	3	2	1	1	3	0	0	19.1201	28.5625	1	7	1	4	3	40	19	22	15	3000	94	114	100	103	155	133	58	93	77	76	116	97	12
4695	1	0	0	0	0	0	0	0	0	0	0	0	0	0	1	1	60	4	2	1	1	1	0	0	3.0438	19.0361	0	23	1	4	2	51	29	36	15	1455	40	168	76	108	176	138	43	76	55	66	104	82	8
4699	0	0	0	0	0	0	0	0	0	0	0	0	0	0	4	1	37	3	4	1	1	3	0	0	2.7538	9.2736	0	4	1	6	4	42	34	18	15	3925	69	98	79	95	124	108	28	67	54	54	86	72	16
4708	0	1	0	0	0	0	0	0	0	0	0	0	0	0	4	2	75	3	#NULL!	1	1	3	0	0	1.7172	3.8986	1	8	1	4	4	54	39	28	15	2740	64	112	95	106	150	128	31	65	41	60	93	70	6
4718	0	0	0	0	0	0	0	0	0	0	0	0	0	0	4	1	73	4	1	2	1	1	0	0	13.282	22.8319	0	9	1	3	2	30	32	36	15	1095	74	90	81	109	143	126	38	69	54	70	120	82	16
4732	0	0	0	0	0	0	0	0	0	0	0	0	0	0	4	2	52	4	2	1	1	1	0	0	7.022	7.9278	0	11	1	5	4	47	46	40	15	1942	84	103	91	62	150	108	38	108	61	46	119	76	5
4741	0	0	0	0	0	0	0	0	0	0	0	0	0	0	4	2	47	3	4	1	1	3	0	0	2.9586	9.0243	1	23	1	5	4	41	45	25	15	3920	85	106	95	96	140	113	51	298	72	67	98	79	12
4743	0	1	0	0	0	0	0	0	0	0	0	0	0	0	4	2	40	4	4	1	1	3	0	0	3.7572	5.4813	0	0	2	14	2	61	55	41	11	4180	65	114	82	73	124	102	26	74	54	42	91	71	18
4753	0	0	0	0	0	0	0	0	0	0	0	0	0	0	4	2	35	4	1	1	1	2	0	0	11.9506	15.7451	0	0	1	8	3	38	28	33	15	1880	104	124	114	71	184	127	29	91	65	48	200	87	15
4762	0	1	0	0	0	0	0	0	0	0	0	0	0	0	2	2	64	3	4	1	1	3	0	0	1.8472	7.0042	0	7	1	3	4	40	23	33	14	2004	79	116	96	83	141	102	43	102	57	59	108	72	16
4780	0	0	0	0	0	0	0	0	0	0	0	0	0	0	4	1	71	3	2	1	1	3	1	1	22.1222	24.0681	1	20	1	8	3	56	48	31	10	1944	80	104	91	111	168	136	41	67	56	64	104	83	17
4787	0	1	0	0	0	0	0	1	0	0	0	0	0	0	4	2	79	3	2	1	1	3	0	0	4.8421	6.4604	0	15	2	10	3	63	53	48	13	818	51	109	77	80	159	113	37	127	61	51	130	79	9
4804	0	1	0	0	0	0	0	0	0	0	0	0	0	0	2	2	64	2	4	1	1	3	0	0	0.9619	2.0271	0	5	1	4	2	39	26	21	15	2375	66	87	78	104	143	121	51	79	63	71	94	82	12
4811	1	0	0	0	0	0	0	0	0	0	0	0	0	0	4	1	57	4	4	1	1	2	1	0	4.4546	8.9479	1	17	1	4	4	47	38	28	15	910	107	122	114	95	142	114	22	100	66	51	113	82	20
4816	0	1	0	0	0	0	0	0	0	0	0	0	0	0	4	2	55	4	2	1	1	3	0	0	5.9798	22.034	1	0	1	7	4	65	34	31	15	1500	90	136	107	95	159	126	54	92	66	68	147	85	21
4828	0	0	0	0	0	0	0	0	0	0	0	0	0	0	4	2	26	4	4	1	1	3	1	1	3.269	2.5556	1	3	1	6	4	50	37	29	15	2500	122	164	143	96	151	112	53	98	64	67	116	80	19
4829	0	0	0	0	0	0	0	0	0	0	0	0	0	0	3	1	40	3	2	1	1	3	1	0	0.9164	38.6646	1	4	1	2	1	51	47	30	15	543	59	85	69	87	188	101	32	144	66	51	159	78	12
4835	0	0	0	0	0	0	0	0	0	0	0	0	0	0	4	2	36	4	4	1	1	1	0	0	4.9895	15.0201	0	-7	1	2	3	25	17	28	15	1555	83	120	96	88	140	112	44	71	52	59	186	75	10
4838	0	1	0	0	0	0	0	0	0	0	0	0	0	0	5	1	79	3	#NULL!	1	1	3	0	0	2.8375	9.6063	1	3	1	9	2	46	50	32	15	2780	52	67	58	95	142	119	47	72	56	63	95	77	12
4839	0	1	0	0	0	0	0	0	0	0	0	0	0	0	2	2	62	4	2	1	1	3	1	1	4.1813	3.959	1	17	1	8	3	101	62	43	14	396	111	125	117	97	130	108	31	69	44	56	86	65	15
4865	0	0	0	0	0	0	0	0	0	0	0	0	0	0	5	2	37	1	1	1	1	2	0	0	15.7093	32.4035	0	2	1	2	4	41	24	34	15	4450	80	123	94	112	222	145	45	117	72	71	157	95	12
4869	0	0	0	0	0	0	0	0	0	0	0	0	0	0	2	2	39	1	4	1	1	3	0	0	0.6938	6.7535	1	16	1	7	3	50	48	20	15	#NULL!	64	98	85	95	237	151	42	110	77	61	154	96	14
4871	0	0	0	0	0	0	0	0	0	0	0	0	0	0	2	2	58	1	4	2	1	3	1	0	2.0443	10.7757	1	23	1	3	3	43	31	23	15	#NULL!	71	88	78	147	180	158	76	95	87	100	122	111	20
4883	0	1	0	0	0	0	0	0	0	0	0	0	0	0	4	1	35	4	2	1	1	3	0	0	13.1988	22.2	0	0	1	14	4	95	49	50	15	578	96	165	138	64	131	94	32	98	64	48	251	77	12
4895	0	0	0	0	0	0	0	0	0	0	0	0	0	0	5	2	32	5	#NULL!	1	1	2	0	0	1.4724	2.6528	0	0	1	2	4	44	23	33	15	1526	102	158	119	121	185	137	46	112	74	73	140	96	12
4897	0	0	0	0	0	0	0	1	0	0	0	0	0	0	4	1	62	2	#NULL!	1	1	3	0	0	2.624	6.4222	0	5	1	2	2	30	23	32	15	2285	85	130	99	120	154	137	49	74	61	76	101	86	16
4901	0	0	0	0	0	0	0	1	0	0	0	0	0	0	4	2	61	4	2	1	1	1	0	0	2.8464	7.3299	0	7	1	7	1	31	39	21	15	4083	60	74	63	83	131	111	47	68	55	60	121	75	12
4902	1	1	0	0	0	0	0	1	0	0	0	0	0	0	4	2	50	3	4	1	1	1	1	0	54.3256	54.5514	1	28	1	9	2	68	55	45	15	24	68	90	79	82	167	136	33	69	55	49	92	75	19
4904	0	0	0	0	0	0	0	0	0	0	0	0	0	0	4	1	67	3	2	1	1	3	0	0	11.6054	26.1215	0	5	2	11	3	93	64	42	5	633	44	100	71	74	187	129	36	94	63	49	118	85	20
4916	0	0	0	0	0	0	0	0	0	0	0	0	0	0	4	1	72	3	#NULL!	1	1	1	0	0	7.8836	12.9472	0	5	1	7	3	70	56	39	15	1370	109	125	119	85	158	105	45	72	52	56	97	67	14
4924	0	0	0	0	0	0	0	0	0	0	0	0	0	0	4	2	63	4	2	1	1	2	0	0	1.8133	26.1229	0	0	1	4	4	32	29	28	15	2595	71	109	88	83	141	108	40	59	50	57	81	67	10
4929	0	0	0	0	0	0	0	1	0	0	0	0	0	0	4	1	67	3	4	1	1	2	0	0	3.7069	9.884	0	10	1	3	3	46	22	30	14	3052	93	128	107	110	176	139	51	109	74	77	132	98	20
4934	0	0	0	0	0	0	0	0	0	0	0	0	0	0	4	1	53	4	2	1	1	3	0	0	1.204	14.0208	1	-3	1	5	3	52	35	29	14	1075	85	110	97	101	122	112	65	81	72	72	87	80	19
4949	0	0	0	0	0	0	0	0	0	0	0	0	0	0	4	1	54	2	1	2	1	3	0	0	5.1514	10.9667	0	14	1	5	4	49	32	31	15	1288	92	126	106	99	152	115	38	69	53	62	92	74	11
4954	0	1	0	0	0	0	0	1	0	0	0	0	0	0	4	1	61	4	2	2	1	3	0	0	1.8538	3.825	1	19	1	4	3	51	46	34	15	2890	69	132	101	90	166	119	17	97	64	46	119	82	15
4957	0	0	0	0	0	0	0	0	0	0	0	0	0	0	5	1	43	2	#NULL!	1	1	3	0	0	2.6968	6.4979	1	13	1	4	1	20	16	17	15	3930	74	100	86	113	157	138	61	99	83	78	119	103	#NULL!
4961	0	0	0	0	0	0	0	0	0	0	0	0	0	0	4	1	58	4	4	1	1	3	0	0	3.8045	59.0333	1	8	2	8	4	112	68	52	3	985	67	102	82	82	168	118	34	105	62	50	121	81	16
4962	0	0	0	0	0	0	0	0	0	0	0	0	0	0	2	2	57	3	4	3	1	3	0	0	0.9902	3.9243	1	21	2	10	2	58	29	35	13	#NULL!	82	105	91	86	112	96	38	63	54	50	73	64	4
4972	0	0	0	0	0	0	0	0	0	0	0	0	0	0	5	2	42	2	4	1	1	3	0	0	2.4318	2.3917	0	12	2	8	4	83	66	50	3	1977	78	128	99	78	159	102	28	98	54	55	115	69	12
4978	0	0	0	0	0	0	0	0	0	0	0	0	0	0	2	1	49	2	4	1	1	3	0	0	2.6935	7.7813	0	5	1	5	4	52	40	22	12	2195	101	121	110	92	133	111	46	78	66	62	95	81	15
4979	1	0	0	0	0	0	0	0	0	0	0	0	0	0	4	2	72	4	2	1	1	2	0	0	2.2124	16.9813	1	28	1	6	3	75	43	39	14	849	100	143	118	80	122	96	33	83	63	48	88	72	11
4986	0	0	0	0	0	0	0	0	0	0	0	0	0	0	2	1	70	3	4	1	1	3	0	0	1.0803	3.9604	1	0	1	4	3	36	41	38	10	1643	58	103	70	113	234	160	49	128	75	70	163	105	8
5021	0	0	0	0	0	0	0	0	0	0	0	0	0	0	4	2	78	3	#NULL!	1	1	3	0	0	2.7252	4.5396	0	0	1	6	1	40	37	23	14	4130	49	55	52	92	133	110	42	68	52	60	85	71	9
5029	0	0	0	0	0	0	0	0	0	0	0	0	0	0	4	2	65	3	2	1	1	2	0	0	2.0213	12.3174	1	-1	2	4	2	72	44	32	13	1275	64	85	72	79	132	106	22	39	33	39	63	55	12
5032	0	0	0	0	0	0	0	0	0	0	0	0	0	0	3	1	35	2	4	2	1	3	0	0	1.1104	2.2063	0	-4	1	4	1	41	24	29	15	400	60	82	69	87	130	108	21	84	70	51	92	79	10
5035	0	0	0	0	0	0	0	0	0	0	0	0	0	1	1	2	62	2	2	1	1	3	0	0	5.6636	19.4597	1	20	2	11	3	89	73	34	4	1725	84	135	93	85	128	117	33	75	58	61	92	77	14
5046	0	0	0	0	0	0	0	0	0	0	0	0	0	0	4	1	51	4	2	1	1	3	1	1	2.437	3.5132	1	16	2	12	4	99	62	45	8	939	108	159	120	53	138	93	28	80	53	40	261	70	11
5056	0	1	0	0	0	0	0	1	0	0	0	0	0	1	2	2	40	4	2	1	1	3	1	0	3.7395	19.7715	1	21	1	10	3	61	29	21	12	1515	77	97	86	106	180	131	43	91	62	56	110	78	14
5058	0	0	0	0	0	0	0	1	0	0	0	0	0	0	4	2	56	3	4	1	1	3	0	0	1.4412	2.2653	0	18	1	3	4	34	18	28	14	3825	83	100	91	79	110	92	52	76	65	59	83	71	11
5070	1	0	0	0	0	0	0	0	0	0	0	0	0	0	4	1	57	4	2	1	1	3	1	0	3.2248	16.0688	1	10	1	5	4	53	35	31	15	2120	97	123	105	96	145	125	30	79	59	52	98	81	18
5072	0	0	0	0	0	0	0	0	0	0	0	0	0	0	4	2	45	4	2	1	1	3	0	0	10.5344	47.3035	1	5	1	8	3	69	44	35	14	1225	98	165	126	89	129	108	34	88	64	57	94	78	20
5078	0	0	0	0	0	0	0	1	0	0	0	0	0	0	4	2	72	3	4	2	1	1	0	0	1.0063	2.8326	0	12	1	4	3	52	34	26	14	1945	60	72	65	90	131	114	37	95	47	53	101	63	12
5083	0	0	0	0	0	0	0	0	0	0	0	0	0	0	3	1	75	3	#NULL!	1	1	3	0	0	21.1915	21.7354	0	19	1	7	4	61	56	42	15	420	98	133	107	85	176	118	33	67	49	51	100	70	14
5090	1	1	0	0	0	0	1	0	0	0	0	0	0	0	4	2	51	4	2	1	1	3	0	0	36.4321	37.6771	1	29	1	7	2	46	25	23	15	1617	74	98	88	109	130	119	38	64	52	62	86	74	15
5097	1	0	0	0	0	0	0	1	0	0	0	0	0	0	4	2	62	3	2	1	1	3	1	1	6.1376	6.0688	1	17	1	4	2	43	34	36	15	2660	60	72	62	74	128	107	38	75	52	53	87	70	16
5107	0	1	0	0	0	0	0	0	0	0	0	0	0	0	4	1	66	3	2	2	1	1	1	1	5.3657	4.6201	1	9	1	16	4	97	72	49	15	24	90	102	94	88	141	108	38	68	51	54	91	68	15
5124	0	0	0	0	0	0	0	0	0	0	0	0	0	0	4	1	57	4	2	1	1	1	0	0	1.8602	6.1299	0	0	1	4	2	33	28	28	13	1596	66	114	88	104	208	154	38	81	57	56	134	92	8
5149	0	0	0	0	0	0	0	0	0	0	0	0	0	0	4	1	71	3	2	1	1	1	0	0	1.0449	29.2118	0	0	1	2	3	30	28	35	15	1842	75	129	97	104	184	136	42	85	61	66	129	87	4
5163	0	0	0	0	0	0	0	0	0	0	0	0	0	0	4	2	27	4	1	1	1	3	0	0	25.4945	25.4792	0	4	1	5	4	48	26	44	15	1515	107	148	127	83	172	127	37	94	65	55	115	87	16
5193	1	0	0	0	0	0	0	0	0	0	0	0	0	0	4	1	65	3	2	2	1	1	0	0	9.2129	28.4479	1	5	1	2	3	28	21	17	15	1985	80	128	93	92	147	121	40	95	57	63	113	79	13
5197	0	1	0	0	0	0	0	1	0	0	0	0	0	0	4	2	56	3	1	1	1	3	0	0	3.1499	31.9736	1	27	1	12	4	58	46	32	14	2225	85	106	95	90	135	110	49	75	60	62	96	77	15
5213	0	0	0	0	0	0	0	0	0	0	0	0	0	0	4	2	53	4	1	1	1	1	0	0	3.9027	7.2736	1	15	1	9	3	42	29	19	15	1661	53	99	74	90	188	115	42	104	54	59	107	74	7
5240	0	0	0	0	0	0	0	0	0	0	0	0	0	0	5	2	68	5	2	1	1	3	0	0	0.9879	4.9222	0	14	1	3	3	36	24	24	15	2450	71	99	84	102	159	123	45	71	58	67	92	79	10
5242	0	1	0	0	0	0	0	0	0	0	0	0	0	0	4	1	49	2	4	2	1	3	0	0	14.9538	19.7576	1	4	1	9	2	44	35	31	15	1240	52	87	67	84	154	107	50	80	62	63	107	80	20
5251	0	1	0	0	0	0	0	0	0	0	0	0	0	0	4	2	66	3	#NULL!	1	1	3	1	1	18.775	18.6243	1	11	1	9	4	84	60	39	15	759	57	102	86	76	135	103	34	84	61	53	102	75	14
5264	0	1	0	0	0	0	0	1	0	0	0	0	0	0	4	2	54	3	#NULL!	1	1	3	0	0	15.7006	26.7549	0	7	1	6	4	43	34	43	15	724	80	97	88	75	112	91	56	78	67	62	89	75	15
5266	1	0	0	0	0	0	0	0	0	0	0	0	0	0	4	1	57	4	2	1	1	2	0	0	36.7049	47.95	0	5	1	6	3	84	46	26	15	800	88	155	102	93	146	115	47	78	58	63	91	76	14
5280	0	0	0	0	0	0	0	0	0	0	0	0	0	0	4	2	74	3	3	1	1	3	0	0	1.1568	5.4215	0	3	1	2	2	31	25	23	14	1920	93	113	103	116	143	130	35	76	62	67	95	85	11
5282	0	0	0	0	0	0	0	0	0	0	0	0	0	0	4	2	55	3	4	1	1	3	0	0	2.6944	15.0403	1	4	1	3	4	62	31	27	15	1415	102	124	112	73	132	90	28	99	45	44	110	60	16
5340	0	0	0	0	0	0	0	0	0	0	0	0	0	0	4	1	46	4	4	1	1	2	0	0	3.5088	5.334	0	-2	1	3	3	28	29	34	15	3260	87	123	111	112	187	145	61	111	83	82	145	103	10
5351	0	0	0	0	0	0	0	1	0	0	0	0	0	0	4	1	69	3	#NULL!	1	1	3	0	0	28.5917	28.5924	1	15	1	6	3	39	40	40	15	915	64	94	85	101	193	142	45	89	60	63	122	87	12
5360	0	1	0	0	0	0	0	0	0	0	0	0	0	0	4	2	56	4	4	1	1	3	0	0	3.3325	6.9104	1	5	1	4	4	58	40	33	15	1740	68	96	76	63	151	116	44	95	67	20	101	80	15
5366	0	0	0	0	0	0	0	0	0	0	0	0	0	0	4	2	61	4	2	1	1	1	0	0	2.7126	9.6799	1	17	1	3	3	38	32	23	15	4325	82	105	90	82	128	100	23	73	52	53	88	70	15
5375	0	0	0	0	0	0	0	1	0	0	0	0	0	0	4	1	62	4	4	1	1	3	0	0	0.8024	8.8799	0	10	1	3	2	41	26	28	15	1710	71	87	78	89	106	100	39	59	47	56	74	65	10
5381	1	0	0	0	0	0	0	1	0	0	0	0	0	0	4	1	68	3	2	1	1	2	0	0	4.7567	41.8104	0	22	1	4	3	41	41	33	15	3600	96	137	117	96	139	117	53	95	73	70	104	88	14
5382	0	0	0	0	0	0	0	0	0	0	0	0	0	0	4	2	51	4	2	3	1	3	0	0	3.8838	7.7354	1	22	1	6	2	29	20	18	15	2270	60	80	68	94	169	133	54	91	74	63	110	91	12
5391	0	0	0	0	0	0	0	0	0	0	0	0	0	0	4	2	63	4	2	1	1	3	1	1	8.9023	8.8583	1	8	1	4	4	54	36	46	15	550	79	118	93	81	165	114	48	72	60	59	98	77	19
5394	0	0	0	0	0	0	0	0	0	0	0	0	0	0	3	1	48	2	4	1	1	2	1	1	2.9292	2.8021	1	19	1	5	3	42	31	21	15	3670	70	81	76	100	144	122	37	103	52	60	115	75	15
5395	0	0	0	0	0	0	0	1	0	0	0	0	0	0	1	2	63	4	2	1	1	1	0	0	2.9144	6.1979	0	12	1	6	4	32	36	33	15	2215	90	136	112	86	201	109	36	86	58	54	123	73	9
5397	0	0	0	0	0	0	0	1	0	0	0	0	0	0	4	2	57	2	4	6	1	1	0	0	2.4579	6.4104	0	9	1	3	3	67	30	31	15	2305	103	114	107	102	142	121	27	63	50	52	89	73	20
5448	0	0	0	0	0	0	0	0	0	0	0	0	0	0	4	2	57	4	2	1	1	3	0	0	0.9883	39.2215	1	5	1	5	3	84	44	33	9	1775	72	137	100	107	145	127	41	90	65	71	107	85	17
5450	0	0	0	0	0	0	0	0	0	0	0	0	0	0	4	1	80	4	2	1	1	3	0	0	1.7726	5.7951	1	9	1	3	2	50	34	37	15	550	63	87	74	103	160	132	38	78	58	60	101	83	15
5453	0	0	0	0	0	0	0	0	0	0	0	0	0	0	4	2	54	2	4	1	1	3	0	0	1.7747	5.9111	1	16	1	4	3	34	28	32	15	1555	59	80	67	106	146	122	53	77	65	71	99	84	9
5460	0	0	0	0	0	0	0	0	0	0	0	0	0	0	4	2	61	2	#NULL!	2	1	2	0	0	0.9085	4.8826	0	14	1	3	4	39	36	24	15	2405	78	113	96	91	144	120	51	87	71	61	97	82	20
5476	1	0	0	0	0	0	0	1	0	0	0	0	0	0	4	1	80	3	#NULL!	2	1	3	0	0	1.894	4.7813	1	9	1	4	3	44	40	40	15	440	80	82	81	90	117	102	37	57	47	51	72	61	22
5486	0	0	0	0	0	0	0	0	0	0	0	0	0	0	4	2	57	4	2	1	1	1	0	0	1.0733	30.2049	0	16	1	6	3	51	33	33	15	1501	91	133	107	89	186	136	51	86	69	54	115	88	8
5489	1	1	0	0	0	0	0	1	0	0	0	0	0	0	4	2	64	3	#NULL!	1	1	3	0	0	3.9783	3.9799	1	22	2	8	4	77	53	42	13	0	60	111	78	80	142	112	20	99	54	39	104	67	10
5490	0	0	0	0	0	0	0	0	0	0	0	0	0	0	4	1	75	3	2	1	1	2	0	0	1.5162	11.2944	0	14	1	3	2	34	37	43	14	1073	56	90	77	118	193	164	52	86	69	74	125	102	10
5491	0	0	0	0	0	0	0	1	0	0	0	0	0	0	4	2	77	4	2	1	1	3	0	0	28.6128	28.6132	1	17	1	3	1	38	41	33	13	2730	51	71	59	112	161	146	41	70	54	68	100	85	12
5493	0	0	0	0	0	0	0	1	0	0	0	0	0	0	4	1	46	4	2	1	1	3	0	0	1.5088	4.85	0	7	1	2	4	46	19	21	15	1860	97	114	104	124	171	153	82	104	96	96	124	115	13
5495	0	1	0	0	0	0	0	0	0	0	0	0	0	0	4	2	79	3	2	3	1	3	0	0	5.6112	23.7056	1	35	1	9	3	72	71	47	14	45	69	131	112	57	150	99	36	76	55	44	86	65	8
5502	0	0	0	0	0	0	0	0	0	0	0	0	0	0	4	2	40	4	4	1	1	2	0	0	6.236	11.1403	1	0	1	3	4	33	13	24	14	1435	99	125	109	107	137	120	46	80	64	69	97	83	14
5512	0	0	0	0	0	0	0	0	0	0	0	0	0	0	4	2	70	2	4	1	1	1	0	0	3.1394	52.6257	0	0	1	3	1	23	38	29	9	2605	65	86	70	103	160	132	55	112	67	75	117	89	9
5513	0	0	0	0	0	0	0	0	0	0	0	0	0	0	4	1	51	4	#NULL!	1	1	3	0	0	1.5852	6.2833	0	11	1	2	4	34	28	15	14	5615	87	142	108	125	155	138	49	105	65	75	118	89	13
5518	0	1	0	0	0	0	0	0	0	0	0	0	0	0	3	2	20	2	4	1	1	2	0	0	4.2393	123.688	0	-3	1	5	4	79	33	26	15	2435	96	166	119	81	149	109	29	81	48	6	104	65	12
5525	1	0	0	0	0	0	0	0	0	0	0	0	0	0	4	2	65	3	2	3	1	1	0	0	5.7583	16.1465	1	15	1	8	3	60	42	40	15	1235	95	104	100	87	135	115	36	70	54	56	83	68	14
5535	0	0	0	0	0	0	0	1	0	0	0	0	0	0	4	2	80	3	#NULL!	1	1	3	0	0	2.847	32.7222	1	26	1	5	4	82	52	38	14	296	74	97	88	96	119	108	26	54	40	50	73	63	13
5536	0	1	0	0	0	0	0	0	0	0	0	0	0	0	4	1	64	4	2	1	1	3	0	0	3.5557	8.5146	0	5	1	10	4	45	45	37	15	855	75	99	86	78	163	110	43	70	54	55	101	71	18
5548	1	0	0	0	0	0	0	1	0	0	0	0	0	0	4	1	76	3	2	1	1	3	0	0	1.85	4.8451	1	20	1	5	3	53	38	26	15	1692	63	88	74	97	201	127	32	83	47	55	108	73	17
5553	0	0	0	0	0	0	0	0	0	0	0	0	0	0	2	1	54	2	4	1	1	3	0	0	1.9575	9.1826	1	6	1	7	3	56	47	30	9	2630	103	128	113	102	164	135	57	105	86	68	123	98	10
5557	0	1	0	0	0	0	0	0	0	0	0	0	0	0	5	2	53	4	2	1	1	3	1	0	3.8281	17.8861	1	14	1	16	3	78	53	42	15	645	68	99	86	71	133	105	30	69	53	44	86	70	16
5561	0	0	0	0	0	0	0	0	0	0	0	0	0	0	4	2	46	4	4	1	1	3	0	0	1.9295	23.6819	1	19	1	10	3	57	31	28	15	1545	70	97	84	101	132	117	42	66	55	63	83	75	12
5562	0	0	0	0	0	0	0	0	0	0	0	0	0	0	4	2	52	4	2	1	1	3	1	1	2.7912	2.5819	1	26	1	3	4	55	37	37	15	1425	96	132	117	84	119	99	38	87	56	56	97	70	18
5570	1	0	0	0	0	0	0	0	0	0	0	0	0	0	2	1	66	3	4	1	1	3	0	0	35.2279	35.2201	1	21	2	7	4	71	55	43	12	45	101	130	111	92	139	116	27	87	46	49	103	69	20
5575	1	0	0	0	0	0	0	0	0	0	0	0	0	0	4	2	51	3	4	1	1	1	0	0	2.8078	5.5972	0	11	2	2	3	51	29	30	13	1752	89	155	124	91	127	102	52	82	62	66	99	77	16
5578	0	1	0	0	0	0	0	0	0	0	0	0	0	0	4	1	52	4	2	1	1	3	1	1	1.2289	1.4819	1	0	1	13	4	92	56	39	14	250	69	139	114	58	164	89	26	80	49	39	107	63	7
5596	0	0	0	0	0	0	0	1	0	0	0	0	0	0	4	2	49	4	4	1	1	2	0	0	2.5988	39.9944	1	10	1	3	3	33	29	27	15	2645	81	116	102	83	131	112	51	68	59	68	93	79	9
5598	0	0	0	0	0	0	0	0	0	0	0	0	0	0	4	2	58	1	2	2	1	3	0	0	2.9694	4.9424	1	17	1	2	3	48	44	28	15	1050	103	120	112	99	134	111	47	81	59	66	96	76	18
5608	1	0	0	0	0	0	0	1	0	0	0	1	0	0	4	2	80	3	2	1	1	3	0	0	3.4105	16.575	1	24	1	4	2	21	43	34	15	2854	79	98	88	113	190	148	37	124	63	68	147	92	12
5611	0	0	0	0	0	0	0	0	0	0	0	0	0	0	2	2	40	4	2	1	1	1	0	0	2.07	6.7896	0	15	1	4	3	32	31	37	15	4090	89	133	104	107	165	138	60	80	70	73	100	90	15
5619	1	0	0	0	0	0	0	0	0	0	0	0	0	0	2	2	78	3	2	3	1	3	0	0	8.8117	16.5764	1	17	1	3	3	48	38	24	15	1672	63	70	66	82	100	90	51	68	57	63	75	68	18
5629	0	0	0	0	0	0	0	0	0	0	0	0	0	0	4	2	42	2	4	1	1	3	0	0	3.8088	12.7132	1	-2	1	4	3	46	48	34	15	3620	49	139	57	92	156	108	47	91	57	63	113	74	13
5631	0	0	0	0	0	0	0	0	0	0	0	0	0	0	4	1	46	2	1	1	1	3	0	0	2.9865	8.7597	1	13	1	4	3	64	33	43	14	1975	67	146	107	115	191	154	68	108	87	2	142	110	14
5646	0	1	0	0	0	0	0	0	0	0	0	0	0	0	2	2	57	3	4	1	1	3	0	0	5.6667	5.6438	1	10	2	9	4	92	45	47	11	15	61	115	77	77	119	110	25	93	61	49	101	77	13
5662	0	0	0	0	0	0	0	0	0	0	0	0	0	0	4	1	79	3	2	1	1	1	0	0	4.8941	12.2813	1	17	2	3	3	34	27	18	10	3595	67	103	86	100	228	151	43	104	67	62	136	95	18
5689	1	0	0	0	0	0	0	1	0	0	0	0	0	0	4	1	73	3	#NULL!	1	1	1	0	0	1.2003	21.7014	1	17	1	4	3	79	50	40	15	224	71	173	93	100	157	132	24	103	51	57	297	86	16
5691	0	1	0	0	0	0	0	0	0	0	0	0	0	0	2	1	76	3	2	1	1	1	0	0	1.2606	4.3042	1	5	1	7	3	47	37	26	14	2440	54	72	64	86	169	131	36	66	52	55	104	80	6
5698	0	1	0	0	0	0	0	0	0	0	0	0	0	0	2	1	62	3	#NULL!	1	1	3	1	1	18.7134	19.4486	1	9	1	6	3	70	48	44	15	1815	74	135	93	74	181	105	37	90	57	49	120	74	18
5710	0	0	0	0	0	0	0	1	0	0	0	0	0	0	5	1	56	4	#NULL!	1	1	3	0	0	7.8333	12.6958	0	7	1	7	4	66	48	47	15	283	102	130	114	77	113	97	38	66	50	54	79	65	19
5712	0	1	0	0	0	0	0	0	0	0	0	0	0	0	4	2	48	2	4	2	1	3	0	0	3.0514	6.7146	1	8	1	6	2	45	46	23	15	1595	100	120	106	90	121	106	42	67	55	58	84	72	14
5727	1	0	0	0	0	0	0	1	0	0	0	0	0	0	2	2	59	4	3	12	1	3	0	0	2.964	3.8465	0	26	1	7	3	50	34	29	12	#NULL!	92	115	99	113	141	132	79	96	89	87	107	99	16
5749	0	0	0	0	0	0	0	1	0	0	0	0	0	0	5	2	63	4	2	1	1	3	1	1	6.0008	14.8583	1	16	1	10	2	54	59	40	15	991	64	111	78	77	117	99	51	68	59	60	86	74	16
5752	0	0	0	0	0	0	0	1	0	0	0	0	0	0	3	1	50	3	2	1	1	1	0	0	8.1787	15.6153	0	12	1	10	4	72	50	40	15	426	104	159	128	77	131	111	28	71	52	54	82	72	7
5760	0	1	0	0	0	0	0	0	0	0	0	0	0	0	4	1	52	4	2	1	1	3	0	0	5.2291	53.9694	0	14	1	3	4	57	34	26	14	1880	109	126	116	75	118	96	19	63	43	40	79	61	15
5763	0	0	0	0	0	0	0	0	0	0	0	0	0	0	1	1	76	3	2	1	1	3	0	0	0.8634	2.0361	1	5	1	6	2	46	41	29	14	984	75	85	80	88	127	106	45	98	56	63	106	73	13
5771	1	0	0	0	0	0	0	0	0	0	0	0	0	0	4	2	78	3	2	1	1	1	0	0	3.0633	14.9771	1	16	1	8	2	64	49	53	15	36	60	71	61	101	182	147	31	54	41	53	100	72	5
5772	0	0	0	0	0	0	0	1	0	0	0	0	0	0	4	1	65	3	1	4	1	3	0	0	1.0271	4.1472	0	15	1	5	2	42	37	31	15	3235	66	92	74	96	130	115	31	65	43	46	72	61	10
5775	0	0	0	0	0	0	0	1	0	0	0	0	0	0	4	2	20	4	#NULL!	1	1	3	0	0	4.2705	5.3118	0	11	1	9	4	32	27	28	15	3510	103	121	114	88	150	120	34	87	63	52	104	82	16
5786	0	0	0	0	0	0	0	0	0	0	0	0	0	0	2	2	54	4	1	1	1	3	0	0	7.7385	15.6556	1	11	1	7	3	59	34	46	15	1360	80	113	101	92	172	125	40	85	62	58	104	81	16
5794	0	0	0	0	0	0	0	0	0	0	0	0	0	0	4	2	45	3	1	3	1	1	0	0	7.7908	42.2208	1	5	1	4	2	40	28	32	15	1080	59	77	66	96	131	113	36	55	45	57	80	67	12
5797	0	0	0	0	0	0	0	0	0	0	0	0	0	0	4	2	58	4	4	1	1	3	0	0	7.8207	21.8111	0	27	1	2	2	55	49	31	15	725	90	158	125	69	142	101	37	88	51	51	106	68	15
5801	0	0	0	0	0	0	0	0	0	0	0	0	0	0	4	1	47	3	4	1	1	1	0	0	7.7744	14.9576	0	19	1	8	3	53	41	32	15	861	69	102	85	83	144	115	45	78	65	58	101	83	11
5809	0	0	0	0	0	0	0	0	0	0	0	0	0	0	4	1	23	2	#NULL!	1	1	3	0	0	2.9187	4.7417	1	8	1	3	4	19	27	31	15	6040	103	128	115	87	120	103	45	71	59	61	84	74	11
5815	0	0	0	0	0	0	0	0	0	0	0	0	0	0	4	1	64	3	#NULL!	1	1	2	0	0	1.5204	2.3889	0	0	1	6	4	69	41	49	15	1385	90	138	101	89	137	108	36	88	60	52	107	77	12
5818	0	0	0	0	0	0	0	1	0	0	0	0	0	0	4	2	57	3	2	1	1	3	0	0	10.8668	18.9035	1	13	1	7	3	57	45	45	15	1425	102	139	116	104	127	114	57	74	66	75	93	83	16
5830	0	0	0	0	0	0	0	0	0	0	0	0	0	0	4	2	51	3	4	1	1	2	0	0	1.5811	7.9354	0	14	1	5	2	38	23	26	15	1202	65	87	75	133	220	174	52	86	72	80	130	105	11
5833	0	0	0	0	0	0	0	0	0	0	0	0	0	0	4	1	45	3	#NULL!	1	1	3	0	0	2.5415	5.5118	1	19	1	5	4	39	27	31	11	3210	77	105	93	113	181	146	58	98	80	79	126	103	14
5843	0	1	0	0	0	0	0	0	0	0	0	0	0	0	4	1	67	3	4	1	1	3	0	0	0.884	13.0181	1	20	1	4	3	50	46	34	14	905	94	130	110	88	106	98	32	54	43	54	71	61	11
5844	0	1	0	0	0	0	0	1	0	0	0	0	0	1	3	2	80	3	2	2	1	3	1	1	1.343	1.3979	1	15	2	20	4	174	98	66	3	332	84	149	132	61	154	106	32	83	55	5	99	70	20
5866	0	0	0	0	0	0	0	0	0	0	0	0	0	0	4	1	65	3	4	1	1	1	0	0	6.4025	11.4868	0	0	1	3	2	58	41	35	15	1085	54	68	60	63	130	109	23	56	48	36	73	64	11
5869	0	0	0	0	0	0	0	0	0	0	0	0	0	0	4	2	43	4	4	1	1	3	0	0	15.9535	31.6132	1	5	1	2	4	23	25	39	15	2360	78	110	93	89	185	132	48	100	74	62	127	93	8
5882	0	0	0	0	0	0	0	0	0	0	0	0	0	0	4	2	59	2	1	1	1	1	0	0	4.198	10.7181	1	11	2	17	2	105	77	41	3	2165	73	127	101	92	176	123	55	88	67	68	115	85	14
5885	0	0	0	0	0	0	0	0	0	0	0	0	0	0	4	2	50	4	2	1	1	1	0	0	3.7982	14.8743	1	12	1	2	3	33	18	21	14	2640	101	118	112	83	131	99	37	70	52	56	94	69	10
5888	1	0	0	0	0	0	0	0	0	0	0	0	0	0	4	1	79	3	#NULL!	1	1	3	0	0	1.3501	2.2285	1	10	1	4	4	48	36	37	14	1375	40	100	83	127	173	150	32	94	57	66	114	88	17
5890	0	0	0	0	0	0	0	0	0	0	0	0	0	0	2	2	74	3	#NULL!	1	1	3	1	1	20.8194	20.7715	1	0	2	5	4	70	43	48	12	835	108	132	121	76	148	109	46	75	60	57	276	87	20
5893	1	1	0	0	0	0	0	0	0	0	0	0	0	0	4	1	76	3	2	1	1	3	0	0	26.558	26.4056	1	14	1	12	3	85	83	49	15	537	91	123	105	81	134	105	50	72	59	63	92	75	5
5901	0	1	0	0	0	0	0	0	0	0	0	0	0	0	4	1	74	3	4	2	1	3	0	0	4.1137	5.9188	1	19	2	3	3	56	48	46	10	1395	72	100	82	65	164	114	38	107	52	51	121	73	13
5904	0	0	0	0	0	0	0	0	0	0	0	0	0	0	4	2	67	3	4	2	1	3	0	0	2.1675	7.6944	1	10	1	5	3	54	31	34	7	1820	81	109	96	111	152	127	52	84	65	74	107	86	23
5909	1	0	0	0	0	0	0	1	0	0	0	0	0	0	4	2	54	3	2	1	1	2	0	0	7.6211	32.7854	1	17	1	10	3	51	40	36	15	1125	69	90	77	72	137	100	25	92	46	50	111	65	10
5911	0	0	0	0	0	0	0	0	0	0	0	0	0	0	2	2	60	4	4	1	1	2	0	0	7.093	20.8167	1	-2	1	7	3	44	41	37	15	708	72	110	90	116	220	155	59	105	78	73	137	100	10
5924	0	0	0	0	0	0	0	0	0	0	0	0	0	0	4	2	54	3	4	1	1	3	0	0	0.9512	7.4465	1	0	2	4	3	26	33	35	11	2510	61	92	78	97	137	116	46	67	57	62	91	76	11
5932	0	0	0	0	0	0	0	1	0	0	0	0	0	0	5	1	61	4	4	1	1	1	0	0	4.3906	10.1868	0	15	1	4	4	39	20	24	14	2180	80	110	96	88	135	108	25	65	45	55	77	65	18
5933	0	0	0	0	0	0	0	0	0	0	0	0	0	0	4	1	33	4	2	1	1	3	0	0	11.4102	22.7764	0	6	2	16	3	135	65	53	12	184	106	148	128	69	114	91	11	83	45	41	92	61	14
5937	1	1	0	0	0	0	0	0	0	0	0	0	0	0	2	2	41	3	2	1	1	3	0	0	10.2978	10.3007	1	13	1	4	3	38	40	39	15	1035	90	113	101	95	177	138	61	93	78	70	121	98	18
5940	0	0	0	0	0	0	0	0	0	0	0	0	0	0	4	1	32	2	4	1	1	3	0	0	0.6102	67.5438	0	5	1	4	4	42	37	26	15	2200	104	127	114	93	129	109	47	79	60	64	92	76	18
5947	0	0	0	0	0	0	0	0	0	0	0	0	0	0	4	2	54	1	4	1	1	3	0	0	1.0578	5.7403	0	0	1	4	4	19	24	35	15	2340	88	108	94	91	146	116	56	91	68	67	110	84	10
5948	0	0	0	0	0	0	0	0	0	0	0	0	0	0	4	1	54	4	2	1	1	3	0	0	6.2403	10.0069	1	19	1	5	3	50	36	21	15	2380	90	110	99	106	147	127	48	68	59	71	91	82	14
5958	0	0	0	0	0	0	0	0	0	0	0	0	0	0	4	2	72	3	2	1	1	1	0	0	2.1436	23.7243	1	0	1	5	2	29	40	33	13	1400	71	87	79	108	160	136	40	76	52	63	91	78	12
5967	0	0	0	0	0	0	0	0	0	0	0	0	0	0	4	1	76	3	#NULL!	1	1	1	1	1	3.4665	37.3542	1	5	2	7	4	58	54	39	13	465	82	106	96	89	151	118	49	81	55	65	110	78	7
6000	0	0	0	0	0	0	0	1	0	0	0	0	0	0	4	2	79	3	#NULL!	1	1	3	0	0	3.2358	10.9639	1	14	1	8	4	83	47	43	14	206	76	100	85	75	143	96	25	115	47	46	124	63	13
6017	1	0	0	0	0	0	0	1	0	0	0	0	0	0	4	1	64	3	#NULL!	1	1	3	1	1	9.4249	9.3125	1	17	1	12	4	87	60	49	14	61	69	115	98	79	157	106	42	83	63	54	111	78	16
6024	0	0	0	0	0	0	0	0	0	0	0	0	0	0	2	1	66	3	1	1	1	3	0	0	6.0979	9.9889	0	0	1	4	4	32	35	45	15	1257	78	101	87	90	263	177	50	125	86	60	181	114	12
6027	1	0	0	0	0	0	0	0	0	0	0	0	0	1	4	1	80	3	#NULL!	1	1	3	1	1	1.4617	1.3757	1	13	1	7	4	74	39	48	12	1010	90	150	109	122	178	156	59	104	79	27	111	93	20
6061	0	0	0	0	0	0	0	0	0	0	0	0	0	0	3	1	49	3	4	2	1	1	0	0	0.9445	18.0479	0	0	1	7	3	32	36	28	15	4400	91	128	110	110	159	136	64	94	78	79	119	98	10
6062	0	0	0	0	0	0	0	1	0	0	0	0	0	0	4	1	72	3	#NULL!	1	1	3	0	0	11.3147	11.3097	0	15	1	4	4	44	44	46	15	1215	74	107	89	88	151	114	47	84	63	59	139	82	17
6065	0	0	0	0	0	0	0	0	0	0	0	0	0	0	3	1	72	3	#NULL!	1	1	3	1	1	0.6216	0.5611	1	2	2	9	3	100	73	53	3	2225	102	142	122	85	159	111	37	82	53	53	86	68	14
6066	0	0	0	0	0	0	0	0	0	0	0	0	0	0	4	1	79	3	2	1	1	2	0	0	1.4685	5.2632	0	5	1	7	1	44	35	28	14	1965	60	84	69	109	163	130	25	54	37	53	83	67	14
6085	0	0	0	0	0	0	0	0	0	0	0	0	0	0	2	2	63	4	2	2	1	3	0	0	2.2724	12.2167	0	19	1	3	4	32	26	31	14	2655	84	103	92	91	111	98	49	69	58	60	75	67	17
6091	0	0	0	0	0	0	0	0	0	0	0	0	0	0	5	1	21	2	2	1	1	2	0	0	0.6663	5.6722	0	0	1	2	4	32	19	21	14	2315	77	120	94	89	114	103	37	64	48	55	75	66	13
6098	0	0	1	0	0	0	0	1	0	0	0	0	0	0	4	2	65	3	1	2	1	3	1	1	1.3475	1.2688	1	20	1	10	2	69	51	44	10	916	83	102	94	119	147	132	43	99	57	64	105	74	15
6099	1	1	0	0	0	0	1	1	0	0	0	0	0	0	4	2	56	4	#NULL!	1	1	1	0	0	27.0395	26.484	1	18	1	2	3	36	18	35	13	2450	74	104	87	106	151	121	48	80	60	5	98	63	12
6100	1	0	0	0	0	0	0	0	0	0	0	0	0	0	4	2	78	3	2	1	1	1	0	0	10.4005	19.2188	1	20	1	14	2	108	94	59	3	158	70	112	96	82	138	108	40	62	50	52	88	67	5
6105	0	0	0	0	0	0	0	0	0	0	0	0	0	0	5	1	79	3	2	1	1	1	0	0	2.9625	7.9458	1	6	1	4	4	38	40	42	15	988	85	115	95	91	152	120	40	73	55	58	104	78	10
6112	1	0	0	0	0	0	0	1	0	0	0	1	0	0	5	2	70	3	#NULL!	1	1	1	1	1	7.3969	7.3507	1	16	1	5	4	74	55	50	15	738	96	137	119	63	138	99	43	80	60	49	96	72	14
6126	1	0	0	0	0	0	0	0	0	0	0	0	0	0	5	1	70	4	2	1	1	3	1	0	5.8725	57.2854	1	8	1	6	3	66	47	43	14	3550	79	144	119	68	149	103	18	87	50	35	109	68	14
6131	0	0	0	0	0	0	0	0	0	0	0	0	0	0	4	2	68	4	#NULL!	1	1	2	0	0	27.1872	56.8118	0	0	1	8	4	49	43	34	15	4584	83	98	91	70	142	102	40	87	64	56	125	78	18
6146	1	0	0	0	0	0	0	1	0	0	0	0	0	1	4	2	73	3	2	1	1	3	0	0	1.0142	10.7958	1	15	1	7	2	52	47	19	15	1755	59	88	71	85	117	102	46	66	53	59	83	70	16
6147	0	0	0	0	0	0	0	0	0	0	0	0	0	0	4	1	60	3	1	2	1	1	0	0	7.4412	12.2528	1	16	1	9	4	66	43	42	15	854	82	142	112	82	149	105	40	89	62	57	112	78	11
6151	0	0	0	0	0	0	0	1	0	0	0	0	0	0	4	1	52	4	#NULL!	1	1	3	0	0	4.5652	14.5729	0	13	2	7	4	98	54	40	3	6599	86	126	105	86	136	107	14	80	43	49	89	64	16
6155	0	0	0	0	0	0	0	0	0	0	0	0	0	0	4	1	62	3	4	2	1	3	0	0	4.3475	7.0181	0	36	1	4	3	40	38	25	10	1760	69	89	78	117	154	135	34	66	47	62	88	76	14
6160	0	0	0	0	0	0	0	0	0	0	0	0	0	0	1	2	43	2	2	1	1	3	0	0	2.1939	23.0542	0	10	1	6	3	55	46	27	15	400	67	78	73	76	104	89	28	44	37	44	64	54	11
6166	0	0	0	0	0	0	0	0	0	0	0	0	0	0	1	2	72	4	2	1	1	3	0	0	7.348	19.8451	1	5	1	2	3	56	36	44	15	1342	68	132	98	81	228	128	44	149	67	54	167	83	11
6210	0	0	0	0	0	0	0	0	0	0	0	0	0	0	4	2	45	4	2	1	1	3	0	0	1.2076	3.4931	0	14	1	2	2	33	18	25	13	1825	72	85	79	123	176	153	76	103	91	92	127	112	20
6214	1	0	0	0	0	0	0	1	0	0	0	0	0	0	5	2	68	4	2	1	1	3	0	0	16.4517	21.8639	0	12	1	6	2	63	44	32	15	5700	83	100	90	78	189	140	48	85	64	49	120	86	14
6218	0	1	0	0	0	0	0	1	0	0	0	0	0	0	4	2	68	3	1	1	1	3	0	0	0.9642	6.9035	1	12	1	4	2	45	48	34	15	420	61	74	65	89	150	113	28	64	45	49	93	67	14
6231	0	0	0	0	0	0	0	0	0	0	0	0	0	0	5	2	43	4	2	1	1	2	0	0	1.0189	5.6882	0	0	1	3	3	19	17	31	14	4249	76	130	98	100	149	124	50	73	59	66	95	79	11
6233	0	0	0	0	0	0	0	0	0	0	0	0	0	0	3	2	26	1	2	1	1	3	0	0	4.069	5.809	0	5	1	4	4	23	24	26	15	2120	67	104	81	94	164	120	47	85	63	67	105	81	12
6251	0	0	0	0	0	0	0	1	0	0	0	0	0	0	5	1	40	2	2	1	1	3	0	0	3.7463	9.909	0	15	1	7	4	56	44	39	15	3478	97	124	112	76	142	98	50	88	65	60	254	83	24
6252	0	1	0	0	0	0	0	0	0	0	0	0	0	0	4	2	50	3	4	1	1	3	1	1	1.0489	10.6417	1	26	2	15	4	77	66	38	12	1432	94	119	109	46	149	97	32	93	52	37	98	64	20
6263	0	0	0	0	0	0	0	0	0	0	0	0	0	0	4	2	57	2	4	1	1	2	0	0	13.0653	13.066	0	-1	1	4	3	12	19	30	15	3605	73	91	78	101	146	126	50	74	59	65	92	80	16
6268	0	0	0	0	0	0	0	0	0	0	0	0	0	0	4	2	46	3	2	1	1	2	0	0	2.7594	23.6069	1	17	1	3	3	41	40	33	15	1585	70	126	100	70	142	115	44	88	70	58	100	85	6
6278	0	0	0	0	0	0	0	0	0	0	0	0	0	0	4	1	69	3	2	1	1	1	0	0	11.0459	22.1875	0	0	1	6	2	36	37	22	15	1543	60	80	68	87	151	116	26	60	44	53	90	67	14
6294	0	0	0	0	0	0	0	1	0	0	0	0	0	0	4	2	53	4	4	1	1	3	0	0	10.7727	21.7431	0	7	1	2	4	48	34	32	15	1444	67	118	85	85	121	98	53	85	64	64	97	76	13
6299	0	1	0	0	0	0	0	0	0	0	0	0	0	0	4	2	61	4	2	1	1	3	0	0	14.1777	43.9819	0	3	1	12	3	70	41	38	14	1455	85	108	99	80	137	101	38	69	54	53	115	70	12
6304	1	0	0	0	0	0	0	0	0	0	0	0	0	0	5	1	73	3	2	1	1	3	0	0	1.2544	10.1083	1	8	1	5	4	70	52	26	15	1800	75	146	100	80	109	91	32	80	49	48	90	63	14
6311	0	0	0	0	0	0	0	0	0	0	0	0	0	0	4	2	64	4	4	1	1	1	0	0	1.9643	18.2139	1	3	1	3	4	33	35	19	15	2970	58	95	70	95	172	124	46	86	67	65	102	86	13
6346	1	0	0	0	0	0	0	0	0	0	0	0	0	0	5	2	66	3	4	1	1	3	0	0	5.8744	5.8583	1	8	1	3	3	23	35	33	14	2580	70	100	83	96	139	113	45	76	58	64	94	76	8
6348	0	0	0	0	0	0	0	0	0	0	0	0	0	0	4	1	40	4	4	1	1	3	0	0	1.4578	8.2014	1	13	1	5	2	53	20	24	9	1645	42	86	60	99	132	114	48	103	65	67	113	81	10
6353	0	0	0	0	0	0	0	0	0	0	0	0	0	0	4	2	42	4	2	1	1	3	0	0	1.986	4.6271	0	12	1	3	2	48	32	16	15	3100	41	106	89	73	203	150	35	100	74	48	134	99	6
6365	1	1	0	0	0	0	0	0	0	0	0	0	0	0	4	2	71	4	2	2	1	2	0	0	20.0927	173.74	1	10	1	5	2	58	42	38	15	1995	89	120	101	110	168	133	48	83	59	65	107	80	18
6378	0	0	0	0	0	0	0	1	0	0	0	0	0	0	4	2	61	3	2	3	1	2	0	0	8.7685	12.5569	0	20	1	4	4	53	36	44	15	2985	55	122	91	85	147	120	47	79	64	13	93	75	15
6381	0	0	0	0	0	0	0	1	0	0	0	0	0	0	4	1	46	4	2	1	1	3	1	0	21.1285	48.1514	1	26	2	12	3	78	48	35	13	1725	94	149	117	89	112	99	50	89	62	60	94	71	15
6392	0	0	0	0	0	0	0	0	0	0	0	0	0	0	2	2	63	3	4	1	1	1	0	0	3.3581	9.3854	1	5	1	5	2	67	55	30	15	22	56	78	64	74	136	103	34	72	47	47	84	65	13
6396	0	0	0	0	0	0	0	0	0	0	0	0	0	0	4	1	79	3	#NULL!	1	1	1	0	0	5.8276	13.35	1	17	1	4	4	44	44	41	15	705	82	117	102	104	146	120	44	64	53	65	102	76	12
6423	0	1	0	0	0	0	0	0	0	0	0	0	0	0	4	1	75	3	1	1	1	3	0	0	3.0787	8.2667	0	4	2	17	4	101	65	47	13	1605	93	140	112	83	148	108	38	84	56	57	105	74	9
6428	0	1	0	0	0	0	0	0	0	0	0	0	0	0	2	1	21	1	4	1	1	3	0	0	2.2004	5.3785	0	5	1	5	3	45	15	28	15	#NULL!	106	136	119	85	123	101	26	65	42	48	82	62	16
6429	0	0	0	0	0	0	0	0	0	0	0	0	0	0	2	1	44	2	#NULL!	1	1	3	0	0	4.9275	35.0563	0	22	1	7	4	87	44	34	15	538	97	157	136	88	125	106	65	97	77	72	103	83	16
6432	0	0	0	0	0	0	0	0	0	0	0	0	0	0	5	2	61	3	4	1	1	3	0	0	0.9607	4.9097	1	7	2	7	3	86	51	40	6	3525	66	90	80	82	115	94	40	67	51	55	82	66	20
6440	0	0	0	0	0	0	0	1	0	0	0	0	0	0	4	2	23	2	4	1	1	3	0	0	3.1506	4.3639	0	12	1	5	3	51	29	18	14	2750	85	98	91	112	163	135	50	110	67	71	124	90	12
6445	0	1	0	0	0	0	0	0	0	0	0	0	0	0	4	2	39	3	4	1	1	1	0	0	21.0422	155.957	0	5	1	4	4	63	29	26	15	3350	95	129	107	81	142	101	23	75	42	45	93	62	14
6447	0	0	0	0	0	0	0	0	0	0	0	0	0	0	4	2	44	3	4	1	1	3	0	0	1.9044	4.9236	1	7	1	6	3	50	63	45	13	1364	78	123	98	113	142	132	67	89	79	86	107	97	14
6448	0	0	0	0	0	0	0	1	0	0	0	0	0	0	2	1	66	3	4	1	1	3	0	0	2.1895	19.7875	1	14	1	3	3	29	28	30	13	1815	65	100	83	122	200	160	51	132	77	66	146	95	14
6466	0	0	0	0	0	0	0	1	0	0	0	0	0	0	4	2	76	3	#NULL!	2	1	3	0	0	33.7997	46.791	1	3	1	5	4	50	47	34	15	1935	70	125	96	65	147	98	40	105	57	49	119	71	14
6470	0	0	0	0	0	0	0	1	0	0	0	0	0	0	4	1	67	3	2	2	1	2	0	0	27.0657	39.0326	1	20	1	7	1	56	52	37	15	1340	60	79	69	53	179	123	26	62	37	36	99	66	10
6471	1	0	0	0	0	0	0	0	0	0	0	0	0	0	4	2	70	3	2	1	1	3	1	1	5.6469	9.6826	1	21	2	11	4	92	70	48	12	1245	97	164	136	65	195	125	43	92	63	50	122	84	11
6472	0	0	0	0	0	0	1	1	0	0	0	0	0	0	4	2	74	3	2	1	1	3	0	0	1.6747	3.7028	1	7	1	4	2	37	43	33	15	1585	67	91	74	71	140	116	41	77	62	52	95	77	13
6488	0	0	0	0	0	0	0	0	0	0	0	0	0	0	4	1	75	3	#NULL!	1	1	3	0	0	0.9403	8.0736	1	27	1	4	2	64	58	26	15	1215	55	74	61	93	171	126	25	90	48	48	111	74	16
6492	1	0	0	0	0	0	1	0	0	0	0	0	0	0	5	2	66	3	#NULL!	1	1	3	1	1	15.4182	15.3681	1	11	1	5	4	62	42	42	15	1080	99	127	110	72	164	105	40	77	55	51	104	71	18
6510	0	1	0	0	0	0	0	0	0	0	0	0	0	1	2	1	56	3	4	2	1	3	1	0	0.0071	24.6625	1	19	1	7	0	42	28	12	#NULL!	#NULL!	#NULL!	#NULL!	#NULL!	#NULL!	#NULL!	#NULL!	#NULL!	#NULL!	#NULL!	#NULL!	#NULL!	#NULL!	#NULL!
6516	0	0	0	0	0	0	0	0	0	0	0	0	0	0	4	1	38	3	4	1	1	1	0	0	7.8919	19.359	1	14	2	14	4	102	44	36	3	830	96	112	103	80	110	94	49	67	58	61	84	70	15
6522	0	0	0	0	0	0	0	0	0	0	0	0	0	0	2	1	80	2	#NULL!	1	1	3	0	0	2.8474	13.466	1	14	2	6	4	68	42	37	6	1590	80	99	88	92	169	131	29	73	55	52	112	84	13
6525	0	1	0	0	0	0	0	1	0	0	0	0	0	0	4	2	63	4	4	1	1	3	1	1	5.8677	4.8479	1	7	1	16	4	116	73	58	14	318	93	130	115	80	150	103	26	83	49	44	105	67	16
6526	0	0	0	0	0	0	0	0	0	0	0	0	0	0	4	2	74	3	2	1	1	2	0	0	1.7625	6.7632	0	8	1	4	1	43	38	27	15	935	42	56	50	96	132	109	33	55	44	54	80	65	11
6543	1	1	0	0	0	0	0	0	0	0	0	0	0	0	4	2	60	4	4	1	1	3	0	0	10.5463	13.4431	1	21	1	6	4	65	40	37	15	1560	66	112	81	78	136	105	40	83	61	53	103	75	7
6550	0	0	0	0	0	0	0	0	0	0	0	0	0	0	2	2	28	2	4	1	1	3	0	0	2.7576	5.8278	0	0	1	5	4	44	24	34	15	955	88	106	97	94	133	116	40	75	63	59	93	80	12
6552	0	0	0	0	0	0	0	0	0	0	0	0	0	0	4	1	42	4	4	1	1	3	0	0	5.5905	7.6382	1	26	1	6	3	51	42	25	15	810	63	109	81	90	129	106	34	70	48	55	89	68	13
6553	0	1	0	0	0	0	0	0	0	0	0	0	0	0	4	1	38	3	2	1	1	1	0	0	3.6834	25.1396	1	13	1	8	3	57	34	32	10	2000	62	95	76	93	139	118	51	85	65	68	261	90	7
6569	0	0	0	0	0	0	0	0	0	0	0	0	0	0	3	2	32	4	2	1	1	2	0	0	4.7543	13.6069	0	5	1	7	3	74	32	39	15	1242	105	161	121	75	174	112	43	96	71	52	119	83	10
6571	0	0	0	0	0	0	0	0	0	0	0	0	0	0	4	2	65	4	2	1	1	3	0	0	0.9693	2.7611	1	23	1	3	2	41	33	21	15	1590	66	87	78	148	185	165	70	87	77	89	106	99	14
6579	0	0	0	0	0	0	0	0	0	0	0	0	0	0	4	2	35	1	1	2	1	3	0	0	1.9409	7.0222	0	8	1	6	4	42	19	23	14	5110	86	98	92	107	159	146	51	83	67	66	100	85	11
6598	1	0	0	0	0	0	0	0	0	0	0	0	0	0	4	2	71	3	#NULL!	2	1	3	0	0	12.3265	17.1194	0	16	1	7	3	64	50	42	15	805	68	93	82	87	130	102	45	84	59	60	88	70	23
6601	0	0	0	0	0	0	0	0	0	0	0	0	0	0	4	2	53	4	4	1	1	3	0	0	20.018	30.1319	0	0	1	8	4	64	39	26	15	2160	92	133	108	72	159	110	33	82	62	47	107	79	16
6604	1	0	0	0	0	0	0	1	0	0	0	0	0	0	4	2	47	4	4	3	1	3	0	0	0.9232	2.5993	1	15	1	3	3	25	20	22	15	2030	62	75	67	92	126	110	38	80	61	60	93	77	15
6605	1	0	0	0	0	0	0	0	0	0	0	0	0	0	5	1	68	3	2	1	1	3	0	0	8.725	8.6993	1	10	1	4	1	42	36	34	15	1345	52	75	64	105	173	132	40	94	56	62	116	81	9
6606	1	0	0	0	0	0	0	1	0	0	0	0	0	0	5	2	45	3	4	1	1	3	0	0	10.9216	15.6792	0	26	1	5	3	35	27	28	15	2006	54	100	67	129	184	157	62	91	78	82	120	103	10
6609	0	0	1	0	0	0	0	1	0	0	0	0	0	0	5	2	71	3	2	1	1	3	0	0	1.8018	1.8889	1	15	1	2	4	42	36	26	15	2345	71	121	86	93	134	120	32	63	50	53	86	73	14
6613	0	1	0	0	0	0	0	0	0	0	0	0	0	1	3	1	51	2	4	1	1	3	0	0	11.1736	36.0861	0	19	1	15	4	87	55	51	15	410	57	107	85	71	152	104	28	86	56	52	104	72	25
6615	1	1	0	0	0	0	0	1	0	0	0	0	0	0	4	1	80	3	4	1	1	3	1	1	3.7889	3.7556	1	15	2	7	4	64	40	50	10	1555	77	118	93	85	143	111	25	79	50	47	98	71	18
6623	0	0	0	0	0	0	0	1	0	0	0	0	0	0	4	2	72	3	1	1	1	3	0	0	4.7377	9.5806	1	17	1	8	2	62	37	28	15	1225	73	102	82	79	136	107	40	66	54	53	87	71	11
6630	0	0	0	0	0	0	0	0	0	0	0	0	0	0	4	1	44	2	4	2	1	3	0	0	2.5845	3.5438	1	4	1	3	3	16	24	28	15	4260	63	83	68	104	134	116	69	88	76	77	95	85	8
6636	0	0	0	0	0	0	0	1	0	0	0	0	0	0	5	2	77	3	#NULL!	1	1	3	0	0	19.9347	19.7229	1	10	1	2	3	24	34	32	15	2775	83	119	101	102	170	142	66	101	83	80	127	104	10
6637	0	1	0	0	0	0	0	1	0	0	0	0	0	0	5	2	79	4	2	1	1	3	1	1	13.2703	13.8007	1	26	2	9	3	112	60	48	12	901	87	110	99	71	143	103	24	70	43	4	94	61	12
6645	0	0	0	0	0	0	0	0	0	0	0	0	0	0	4	1	41	3	2	1	1	3	0	0	1.823	3.0035	0	0	1	2	2	23	24	37	14	1195	61	95	72	74	131	99	40	73	54	52	92	69	8
6651	0	0	0	0	0	0	0	1	0	0	0	0	0	0	4	2	73	3	2	1	1	3	0	0	4.6601	9.6882	1	5	1	7	4	54	46	30	15	1390	92	120	107	83	125	96	50	75	63	61	86	74	12
6658	0	0	0	0	0	0	0	1	0	0	0	0	0	0	4	1	78	4	#NULL!	1	1	2	0	0	4.5899	10.6986	0	10	1	4	4	45	46	36	15	1269	66	106	87	84	146	108	47	78	56	56	105	74	15
6662	0	0	0	0	0	0	0	0	0	0	0	0	0	0	4	1	51	4	2	1	1	3	0	0	1.8312	2.7	1	12	1	3	3	35	33	33	14	500	66	93	81	84	123	104	36	95	58	52	101	73	15
6669	0	0	0	0	0	0	0	0	0	0	0	0	0	0	1	1	49	5	#NULL!	1	1	3	0	0	2.2839	2.9229	0	0	1	3	4	39	23	24	15	3770	57	117	76	83	126	101	42	69	56	56	88	71	15
6676	1	0	0	0	0	0	0	0	0	0	0	0	0	0	4	2	69	3	2	1	1	3	1	0	1.7867	7.8542	1	18	1	9	1	78	52	31	14	359	70	78	74	90	107	98	33	46	38	52	66	58	12
6700	0	0	0	0	0	0	0	0	0	0	0	0	0	0	4	2	37	3	4	2	1	3	0	0	11.2089	23.8611	1	2	2	4	3	68	45	34	6	1580	90	121	108	77	108	95	40	65	51	48	74	61	15
6706	1	0	0	0	0	0	0	0	0	0	0	0	0	0	4	2	78	4	#NULL!	2	1	3	0	0	2.6686	4.8882	0	5	1	2	2	30	26	24	14	1430	48	74	59	105	165	135	48	95	68	67	122	92	16
6709	1	0	0	0	0	0	0	1	0	0	0	0	0	0	4	1	76	3	#NULL!	2	1	3	0	0	1.083	4.9854	1	12	1	2	3	46	44	39	14	509	88	128	104	96	148	115	56	94	74	68	101	83	15
6715	0	0	0	0	0	0	0	0	0	0	0	0	0	0	4	1	23	2	4	1	1	2	0	0	3.5717	12.6972	0	-3	1	3	2	20	15	26	15	1581	89	119	107	121	189	155	56	101	82	78	123	102	16
6718	0	0	0	0	0	0	0	0	0	0	0	0	0	0	4	2	38	2	4	1	1	3	0	0	2.1643	33.091	1	6	1	6	2	63	38	39	14	1202	37	78	59	74	154	103	28	104	56	45	118	71	10
6723	0	0	0	0	0	0	0	1	0	0	0	0	0	0	4	2	63	4	1	1	1	1	0	0	5.6391	13.3479	1	15	1	4	2	38	37	28	15	344	59	80	69	107	145	122	40	69	52	60	95	75	16
6734	0	0	0	0	0	0	0	0	0	0	0	0	0	0	5	1	51	2	#NULL!	1	1	2	0	0	6.4271	11.1958	1	6	1	4	4	33	27	32	15	1330	69	101	85	106	170	137	45	80	60	66	108	82	10
6739	0	0	0	0	0	0	0	0	0	0	0	0	0	0	4	1	65	4	2	1	1	3	0	0	5.0185	11.459	0	5	1	5	4	45	37	42	15	1740	59	149	91	88	166	108	48	100	60	61	222	81	13
6763	0	1	0	0	0	0	0	0	0	0	0	0	0	0	5	2	80	3	2	1	1	3	0	0	0.9613	5.9097	1	11	1	7	3	62	47	47	10	1025	60	152	88	137	182	159	40	74	55	75	110	89	18
6772	0	0	0	0	0	0	0	0	0	0	0	0	0	0	4	1	65	4	2	1	1	3	0	0	6.3714	6.3681	1	30	1	3	3	29	32	37	15	1317	76	112	96	87	123	99	53	76	61	62	79	69	10
6776	0	0	0	0	0	0	0	1	0	0	0	0	0	0	4	2	57	2	4	1	1	3	0	0	1.7412	10.3958	0	18	1	3	2	60	24	15	15	1700	79	103	90	84	138	113	30	73	56	12	91	68	15
6789	0	0	0	0	0	0	0	1	0	0	0	0	0	0	4	1	47	4	1	1	1	3	1	0	30.9423	71.0257	1	13	1	9	4	96	56	59	7	650	102	118	110	106	147	126	55	95	79	72	271	103	24
6793	0	0	0	0	0	0	0	0	0	0	0	0	0	0	2	2	52	2	2	1	1	3	0	0	0.8962	4.4792	0	12	1	2	4	28	35	22	14	2040	111	133	121	95	128	111	59	72	65	71	90	80	20
6803	0	1	0	0	0	0	0	0	0	0	0	0	0	0	4	1	71	3	1	1	1	3	0	0	2.968	8.0514	0	10	1	5	4	59	43	31	15	1111	98	117	104	66	134	106	19	60	48	35	79	66	16
6824	0	0	0	0	0	0	0	0	0	0	0	0	0	0	4	2	60	2	2	1	1	3	0	0	0.9315	12.8944	0	17	1	6	0	48	42	24	15	856	66	81	73	84	119	96	32	48	40	50	70	59	9
6828	0	0	0	0	0	0	0	0	0	0	0	0	0	0	4	1	46	3	1	1	1	3	0	0	2.4121	4.4139	0	-5	1	7	4	32	29	33	15	2066	73	102	87	71	132	99	40	71	53	50	273	96	12
6833	0	0	0	0	0	0	0	0	0	0	0	0	0	0	4	1	52	4	1	1	1	1	0	0	1.0359	11.2813	0	5	1	3	2	51	35	24	15	700	77	101	88	99	141	117	54	75	65	31	137	84	7
6838	0	0	0	0	0	0	0	0	0	0	0	0	0	0	4	2	51	4	2	1	1	3	0	0	2.1168	22.9535	1	16	1	6	3	35	15	31	15	11180	64	96	79	110	155	133	43	73	62	68	96	86	18
6839	0	0	0	0	0	0	0	1	0	0	0	0	0	0	4	1	80	3	#NULL!	1	1	3	1	0	0.8343	5.7694	1	18	2	6	4	70	67	46	10	225	101	138	118	90	134	103	50	71	59	63	89	74	26
6863	0	0	0	0	0	0	0	1	0	0	0	0	0	0	4	2	69	3	2	2	1	3	0	0	6.6193	17.4146	1	22	1	6	1	30	41	36	14	#NULL!	60	89	68	63	182	107	29	106	57	41	140	74	10
6865	0	1	0	0	0	0	0	0	0	0	0	0	0	0	5	2	51	1	2	1	1	3	1	0	1.3933	2.0597	1	16	1	17	4	113	81	51	15	60	44	170	109	33	231	110	3	132	66	19	171	81	23
6872	0	1	0	0	0	0	0	0	0	0	0	0	0	0	4	1	79	3	#NULL!	1	1	3	0	0	1.0841	6.0333	0	8	1	3	4	39	36	33	13	1066	78	101	87	112	171	133	35	78	52	63	109	79	19
6874	0	1	0	0	0	0	0	0	0	0	0	0	0	0	5	1	58	4	2	1	1	3	1	1	9.1497	9.0632	1	5	1	11	4	72	39	49	15	1093	72	127	94	76	140	106	39	102	62	15	203	83	17
6880	0	0	0	0	0	0	0	0	0	0	0	0	0	0	4	2	60	4	2	1	1	3	0	0	2.1817	10.9833	0	11	1	2	4	33	29	33	15	1770	90	116	102	119	178	140	68	96	81	85	124	101	13
6884	0	0	0	0	0	0	0	0	0	0	0	0	0	0	1	1	47	3	2	2	1	3	0	0	2.107	24.2014	1	31	1	6	3	50	39	27	14	2020	86	112	100	93	124	111	59	82	71	67	92	80	15
6893	1	0	0	0	0	0	0	0	0	0	0	0	0	0	4	2	56	2	2	1	1	1	0	0	17.4955	35.5722	1	20	1	6	2	42	37	37	15	720	59	88	72	114	212	167	68	133	99	84	183	122	15
6894	0	0	0	0	0	0	0	0	0	0	0	0	0	0	4	2	56	4	2	2	1	2	0	0	1.4585	13.334	0	3	2	2	3	38	29	23	13	2835	91	127	104	52	123	86	38	67	48	47	85	62	13
6906	0	0	0	0	0	0	0	1	0	0	0	0	0	0	4	1	48	4	2	1	1	3	0	0	3.3919	4.2861	1	24	1	5	2	28	29	21	15	4080	52	109	72	80	151	113	38	88	58	55	101	76	14
6908	1	0	0	0	0	0	0	0	0	0	0	0	0	0	4	2	60	3	#NULL!	1	1	3	0	0	4.9438	18.7715	1	27	1	5	2	62	39	24	15	#NULL!	68	132	96	78	122	97	47	71	57	57	90	71	10
6911	0	1	1	0	0	0	0	0	0	0	0	0	0	0	4	2	63	3	4	1	1	3	0	0	7.8297	7.7944	1	22	1	10	3	52	48	35	15	2425	111	123	115	85	156	110	29	86	60	57	98	74	15
6915	0	1	0	0	0	0	0	0	0	0	0	0	0	0	4	1	61	4	2	1	1	3	0	0	36.8265	39.725	0	7	1	4	2	55	40	45	15	1425	99	144	110	89	149	106	45	80	54	62	107	72	15
6922	0	0	0	0	0	0	0	0	0	0	0	0	0	0	5	1	59	4	2	1	1	3	0	0	11.0524	30.9139	1	23	1	12	4	65	42	40	15	731	71	119	86	77	147	105	28	87	61	50	106	77	12
6939	1	1	0	0	0	0	0	0	0	0	0	0	0	0	4	2	75	3	2	2	1	1	0	0	2.9225	21.1243	0	7	1	4	4	34	43	27	15	1664	61	91	81	86	167	121	53	92	69	63	110	84	13
6952	0	0	0	0	0	0	1	0	0	0	0	0	0	0	4	1	67	3	#NULL!	1	1	3	0	0	3.5446	11.2292	1	10	1	6	2	45	41	38	15	535	68	88	77	81	165	116	47	85	55	58	112	75	8
6953	0	0	0	0	0	0	0	0	0	0	0	0	0	0	4	2	47	3	4	1	1	3	0	0	2.115	6.85	1	5	1	6	2	27	30	21	15	3790	94	131	112	98	132	115	44	84	66	62	97	82	14
6957	0	0	0	0	0	0	0	0	0	0	0	0	0	0	4	1	49	1	2	1	1	1	0	0	4.2213	12.1472	0	16	1	4	3	57	34	47	7	1405	77	113	86	95	183	131	55	107	77	6	135	91	14
6962	0	0	0	0	0	0	0	0	0	0	0	0	0	0	4	1	68	3	#NULL!	2	1	3	0	0	9.1158	9.1063	1	3	1	6	2	51	39	43	15	1070	62	144	85	85	169	108	35	89	51	52	270	81	12
6999	0	0	0	0	0	0	0	0	0	0	0	0	0	0	4	2	65	3	4	1	1	1	0	0	6.1894	13.4583	1	17	2	6	3	48	33	22	12	1024	67	89	77	75	117	97	34	56	43	52	89	61	9
7009	0	0	0	0	0	0	0	0	0	0	0	0	0	0	4	1	41	4	2	1	1	3	0	0	3.7835	23.8319	0	16	2	12	4	86	61	46	12	550	81	123	100	84	128	110	46	68	55	60	86	71	20
7023	0	0	0	0	0	0	0	0	0	0	0	0	0	0	4	1	66	3	2	1	1	3	0	0	2.0763	7.9785	1	5	1	2	2	32	36	43	13	1258	65	95	78	92	138	111	47	82	61	58	93	73	11
7045	0	0	0	0	0	0	0	1	0	0	0	0	0	0	4	2	72	3	4	1	1	2	1	1	6.8707	34.1715	1	15	2	6	4	57	49	38	13	1359	66	110	94	76	120	97	41	85	59	61	97	74	13
7047	0	1	0	0	0	0	0	0	0	0	0	0	0	1	2	1	70	3	#NULL!	1	1	3	1	1	1.0639	1.0646	1	13	1	9	4	103	55	42	15	#NULL!	68	124	103	45	130	98	27	82	46	32	95	62	12
7051	0	0	0	0	0	0	0	0	0	0	0	0	0	0	2	1	58	4	2	4	1	3	0	0	1.7073	3.9375	0	8	1	4	3	37	27	35	15	2400	79	119	98	97	143	110	30	86	55	56	98	73	15
7059	1	0	0	0	0	0	0	0	0	0	0	0	0	0	2	1	66	3	2	2	1	1	0	0	9.8019	20.8111	1	17	1	3	3	24	28	30	15	1428	72	104	83	104	207	149	54	97	69	72	194	95	12
7068	0	0	0	0	0	0	0	0	0	0	0	0	0	0	4	2	71	3	2	1	1	3	0	0	6.0911	28.7882	1	20	1	5	2	47	48	28	15	1750	57	79	64	109	157	137	36	67	47	55	95	73	19
7073	0	0	0	0	0	0	0	0	0	0	0	0	0	0	4	2	58	4	2	1	1	3	1	1	8.4134	7.5688	1	8	1	6	4	45	35	36	15	6180	82	115	95	83	155	106	44	88	54	57	110	71	20
7085	0	0	0	0	0	0	0	0	0	0	0	0	0	0	4	1	42	4	1	1	1	3	0	0	60.7469	67.3743	0	2	1	5	4	65	44	44	15	1530	55	138	102	68	146	106	39	73	57	4	91	71	11
7087	0	0	0	0	0	0	0	0	0	0	0	0	0	0	4	1	74	3	4	1	1	2	0	0	3.0154	36.8854	1	8	1	5	4	63	53	33	15	3351	87	120	108	72	129	100	30	59	46	45	88	66	11
7088	0	0	0	0	0	0	0	0	0	0	0	0	0	0	4	2	75	3	2	1	1	1	0	0	15.3956	33.3576	0	3	1	4	3	34	18	28	14	1295	68	117	91	100	199	133	40	72	50	62	104	74	19
7093	0	0	0	0	0	0	0	0	0	0	0	0	0	0	4	2	33	4	4	1	1	2	0	0	11.5605	22.4313	0	0	1	10	4	92	47	39	3	4375	63	100	86	105	195	139	54	101	67	68	131	87	12
7094	0	0	0	0	0	0	0	0	0	0	0	0	0	0	2	1	32	5	1	1	1	1	0	0	3.8982	5.7104	0	-7	2	5	3	55	40	48	13	3305	86	134	105	17	192	123	5	104	68	14	136	85	12
7101	0	0	0	0	0	0	0	0	0	0	0	0	0	0	4	2	58	3	4	1	1	3	0	0	4.443	20.3924	1	3	1	6	3	81	53	28	15	4620	80	107	92	85	123	104	24	98	55	51	104	71	17
7107	0	0	0	0	0	0	0	1	0	0	0	0	0	0	4	1	76	3	4	1	1	3	0	0	1.1292	2.6493	1	14	1	3	1	40	35	18	15	3840	60	66	61	86	145	106	26	52	37	47	75	60	11
7125	0	0	0	0	0	0	0	0	0	0	0	0	0	0	4	2	51	4	2	1	1	3	0	0	1.8983	28.9382	1	5	1	2	3	41	28	24	14	1405	72	93	83	104	152	125	43	74	55	64	99	78	8
7142	0	0	0	0	0	0	0	0	0	0	0	0	0	0	4	1	75	4	2	1	1	1	0	0	2.7988	14.5563	1	11	1	6	3	52	47	28	15	1672	82	102	93	91	130	110	40	59	48	59	88	71	10
7143	0	0	0	0	0	0	0	0	0	0	0	0	0	0	4	2	54	1	#NULL!	1	1	2	0	0	12.1046	22.6049	0	-7	1	6	4	52	43	43	15	1047	80	127	99	68	161	96	30	80	50	44	104	64	20
7144	0	0	0	0	0	0	0	0	0	0	0	0	0	0	5	1	52	4	#NULL!	1	1	3	0	0	2.6698	6.6514	1	16	2	14	4	94	64	38	8	826	80	105	91	93	148	121	47	77	57	63	96	74	12
7160	0	0	0	0	0	0	0	0	0	0	0	0	0	0	5	2	30	2	4	1	1	3	0	0	17.685	17.6688	0	11	1	7	4	41	21	35	15	1810	89	108	100	96	157	119	60	93	71	75	117	88	14
7166	0	0	0	0	0	0	0	1	0	0	0	0	0	0	4	2	78	3	2	1	1	1	0	0	16.5314	30.3993	0	21	1	6	3	52	41	31	15	2585	45	99	56	87	218	133	34	98	52	45	112	76	14
7181	0	0	0	0	0	0	0	0	0	0	0	0	0	0	4	2	54	2	3	1	1	3	0	0	3.4771	11.9917	0	14	1	5	3	57	45	32	15	85	90	100	96	113	148	129	72	84	78	89	103	95	14
7207	1	0	0	0	0	0	0	1	0	0	0	0	0	0	4	2	78	3	2	1	1	2	0	0	12.6506	20.6646	1	12	1	10	2	48	50	43	15	1790	68	128	82	86	130	112	35	54	44	49	78	64	17
7209	1	0	0	0	0	0	0	0	0	0	0	0	0	0	4	2	52	4	2	1	1	3	1	0	1.9604	12.6535	1	19	1	7	4	58	39	19	15	2195	89	111	97	109	144	128	46	85	63	61	99	78	14
7217	0	0	0	0	0	0	0	0	0	0	0	0	0	0	4	2	36	4	2	1	1	3	0	0	1.388	12.7694	0	10	1	2	3	55	24	29	15	3210	78	134	111	70	140	115	27	84	64	46	108	81	9
7229	0	0	0	0	0	0	0	0	0	0	0	0	0	0	3	2	36	4	2	1	1	2	0	0	38.5332	38.5451	0	1	1	4	4	60	28	42	15	4830	107	156	118	91	162	136	53	113	78	72	201	105	5
7237	0	1	0	0	0	0	0	0	0	0	0	0	0	0	4	2	59	4	4	1	1	3	1	0	11.1651	27.9715	1	16	2	10	2	111	66	49	3	1330	72	84	77	93	160	122	44	80	61	62	111	82	14
7241	0	1	0	0	0	0	0	0	0	0	0	0	0	0	5	2	33	5	4	1	1	3	0	0	1.5431	7.7451	0	3	1	7	4	51	21	26	15	4700	89	138	106	146	223	170	90	129	110	110	160	130	15
7242	0	0	0	0	0	0	1	0	0	0	0	0	0	0	2	2	67	4	2	1	1	1	0	0	5.7507	14.7556	0	16	1	9	3	38	27	25	10	3460	88	102	94	106	157	134	49	86	63	67	110	87	12
7260	0	0	0	0	0	0	0	1	0	0	0	0	0	0	4	1	74	3	#NULL!	2	1	3	1	1	4.9744	4.9292	1	40	1	9	1	67	56	39	13	413	41	61	53	75	97	86	26	57	36	43	65	53	9
7271	0	0	0	0	0	0	0	0	0	0	0	0	0	0	5	1	56	4	2	1	1	3	0	0	23.9903	23.9903	0	6	2	16	4	123	82	62	3	415	85	139	111	79	132	100	46	65	55	55	83	69	16
7275	0	0	0	0	0	0	0	1	0	0	0	0	0	0	4	2	59	3	1	12	1	3	0	0	1.8599	3.8688	1	23	1	6	2	55	33	40	15	0	80	110	95	128	190	164	51	110	96	70	128	112	14
7284	0	0	0	0	0	0	0	0	0	0	0	0	0	0	4	2	59	4	2	1	1	1	0	0	1.7963	10.8313	1	12	1	3	2	41	32	31	14	1970	52	86	71	88	130	111	42	60	51	59	86	71	4
7287	0	0	0	0	0	0	0	0	0	0	0	0	0	0	4	1	72	3	#NULL!	1	1	3	0	0	2.5464	3.6563	1	0	1	2	3	25	35	32	15	2370	55	88	68	106	180	132	39	82	58	62	107	83	10
7291	0	0	0	0	0	0	0	0	0	0	0	0	0	0	3	2	49	4	4	1	1	1	0	0	2.7911	11.0319	0	16	1	7	4	52	36	34	15	2125	41	107	75	122	242	152	57	128	76	80	174	102	6
7299	0	0	0	0	0	0	0	0	0	0	0	0	0	0	2	1	35	4	2	1	1	3	0	0	0.8217	14.6236	1	10	1	5	4	54	26	25	15	2920	96	122	108	103	154	128	42	73	55	66	95	80	7
7309	0	0	0	0	0	0	0	0	0	0	0	0	0	0	2	2	33	1	4	1	1	3	0	0	1.3211	17.6083	0	5	1	4	4	39	41	24	7	3710	63	104	82	129	163	137	65	93	80	87	115	99	10
7328	0	0	0	0	0	0	0	0	0	0	0	0	0	0	4	2	72	3	2	1	1	3	0	0	5.4524	14.3424	1	15	1	4	4	47	47	32	15	4970	69	115	85	79	136	107	44	79	58	58	98	74	12
7336	0	0	0	0	0	0	0	0	0	0	0	0	0	0	5	1	22	4	4	1	1	3	0	0	2.6609	7.6688	1	-5	1	4	3	37	22	24	14	1500	111	135	123	94	127	117	45	73	62	63	79	72	12
7339	0	1	0	0	0	0	0	0	0	0	0	0	0	0	4	2	65	4	2	1	1	3	0	0	2.3901	2.9528	0	14	1	3	4	49	32	30	15	710	65	94	78	92	118	105	49	72	63	59	81	73	12
7354	0	0	0	0	0	0	0	0	0	0	0	0	0	0	4	1	39	3	2	1	1	3	0	0	0.8461	140.915	1	11	1	10	2	94	45	35	6	267	62	78	72	101	129	114	58	86	71	73	98	85	10
7384	0	0	0	0	0	0	0	0	0	0	0	0	0	0	4	1	72	3	2	1	1	1	0	0	13.5131	13.5049	0	5	2	4	3	50	50	39	8	1590	48	74	62	91	172	130	25	79	53	47	81	69	18
7391	0	1	0	0	0	0	0	0	0	0	0	0	0	0	4	1	68	3	2	2	1	1	0	0	5.0056	71.5972	1	-5	2	3	4	81	47	37	12	1560	78	120	93	85	172	134	33	83	54	57	113	81	12
7415	0	0	0	0	0	0	0	0	0	0	0	0	0	0	2	1	31	4	2	1	1	3	0	0	8.288	15.0882	0	6	1	5	4	61	37	36	15	1905	93	126	114	63	125	104	34	83	64	46	95	75	10
7419	0	0	0	0	0	0	0	0	0	0	0	0	0	0	4	1	55	4	1	1	1	3	1	1	0.6599	2.434	1	15	1	11	3	59	50	46	15	1155	90	130	120	73	123	94	40	67	58	51	288	78	25
7427	0	1	0	0	0	0	0	0	0	0	0	0	0	0	4	1	78	3	2	2	1	3	0	0	1.9331	5.6806	0	1	1	5	3	50	48	30	9	2090	64	85	73	98	133	116	47	109	59	62	113	72	9
7440	0	0	0	0	0	0	0	0	0	0	0	0	0	0	2	2	75	3	1	1	1	3	0	0	1.5605	19.6896	1	10	2	11	4	87	60	42	7	155	76	123	92	80	233	153	35	75	50	48	130	82	15
7445	0	0	0	0	0	0	0	1	0	0	0	0	0	0	4	2	78	3	2	2	1	3	0	0	11.7494	18.7208	1	15	1	3	3	42	30	43	15	2340	77	117	98	76	125	100	50	79	62	59	93	74	20
7448	0	0	0	0	0	0	0	0	0	0	0	0	0	0	4	2	57	2	4	1	1	3	0	0	11.1904	24.8674	0	16	1	6	4	45	29	48	14	582	71	109	88	103	170	130	38	72	52	57	99	73	12
7464	0	0	0	0	0	0	0	0	0	0	0	0	0	0	4	2	54	2	2	1	1	3	0	0	8.7849	14.5514	0	16	1	7	3	60	52	48	15	2230	79	150	103	83	183	114	27	101	63	57	128	81	14
7466	0	0	0	0	0	0	0	1	0	0	0	0	0	0	2	2	75	3	4	1	1	3	0	0	4.1249	36.3229	1	29	1	6	2	57	55	45	14	158	56	79	64	91	206	129	43	109	60	59	141	83	3
7481	0	1	0	0	0	0	0	0	0	0	0	0	0	0	5	1	77	3	#NULL!	1	1	1	1	1	4.7278	6.0785	1	18	2	3	3	46	39	28	13	2249	77	110	94	90	138	110	33	67	41	52	87	64	17
7482	0	0	1	1	0	0	0	1	0	0	0	0	0	0	2	1	70	3	2	3	1	3	0	0	6.2331	10.8611	1	15	1	11	3	49	56	43	7	2730	60	113	72	93	139	110	51	81	62	63	97	77	14
7489	0	0	0	0	0	0	0	0	0	0	0	0	0	0	4	1	63	4	#NULL!	1	1	2	0	0	2.9372	8.0083	0	5	1	6	2	52	46	32	15	1827	53	79	64	82	142	103	38	74	55	54	98	71	10
7492	0	0	0	0	0	0	0	0	0	0	0	0	0	0	4	1	55	4	2	1	1	2	0	0	14.2144	17.6306	1	11	1	5	4	57	38	45	15	261	66	108	79	77	129	104	36	67	51	53	91	70	12
7493	1	0	0	0	0	0	0	0	0	0	0	0	0	0	4	2	64	4	2	1	1	1	0	0	2.2703	4.4903	1	28	1	4	3	27	41	19	15	2045	69	92	77	102	168	129	36	65	51	61	98	76	14
7495	0	0	0	0	0	0	0	0	0	0	0	0	0	0	4	2	58	4	2	1	1	2	0	0	13.4877	17.4694	0	18	1	11	4	79	45	49	15	253	88	109	96	73	128	93	22	72	60	54	81	71	17
7509	0	0	0	0	0	0	0	0	0	0	0	0	0	0	4	2	58	4	2	1	1	3	1	0	0.9681	5.2938	1	12	1	7	4	66	49	34	15	1935	117	132	124	87	115	100	32	63	51	59	75	67	10
7514	0	0	0	0	0	0	0	0	0	0	0	0	0	0	4	2	47	4	2	1	1	3	0	0	3.8277	3.8285	0	25	1	8	3	63	37	28	9	1545	118	140	129	105	168	144	34	118	66	62	128	92	18
7524	0	0	0	0	0	0	0	0	0	0	0	0	0	0	4	1	40	2	#NULL!	1	1	2	1	0	11.5042	15.5111	1	8	1	4	4	23	27	27	15	4165	56	92	78	110	187	145	56	95	75	80	125	99	17
7525	0	0	0	0	0	0	0	0	0	0	0	0	0	0	4	1	66	3	2	1	1	3	0	0	3.8197	18.7472	1	12	1	4	4	77	57	36	15	4361	85	123	103	84	131	103	42	74	59	56	93	74	8
7533	1	1	0	0	0	0	0	1	0	0	0	0	0	0	1	1	66	4	2	2	1	3	0	0	10.3771	13.2667	0	33	2	8	2	92	74	49	3	1400	54	80	62	83	155	109	40	91	52	54	108	70	19
7536	0	0	0	0	0	0	0	1	0	0	0	0	0	0	5	1	63	3	1	1	1	1	0	0	5.9809	40.9778	1	32	1	3	4	50	41	33	15	725	73	103	86	105	178	130	48	83	60	67	122	87	12
7538	0	1	0	0	0	0	0	0	0	0	0	0	0	0	4	2	59	3	4	1	1	2	0	0	6.8023	57.625	1	11	1	5	4	53	48	40	15	1492	92	127	110	66	128	97	38	72	54	49	89	67	13
7539	1	0	0	0	0	0	0	1	0	0	0	0	0	0	4	2	78	3	2	1	1	2	0	0	3.8604	17.6382	1	27	1	4	4	52	63	47	15	1050	75	132	85	93	167	122	44	79	53	58	120	74	5
7543	1	0	0	0	0	0	0	1	0	0	0	0	0	0	4	1	78	3	4	1	1	3	0	0	3.8186	8.9785	1	17	1	8	4	90	60	55	6	1365	67	121	84	113	216	153	57	127	77	1	285	101	4
7554	0	0	0	0	0	0	0	0	0	0	0	0	0	0	4	2	78	3	1	2	1	3	0	0	2.7715	14.8986	1	10	1	6	4	54	44	25	14	802	76	104	93	90	170	119	42	90	57	62	107	77	20
7572	0	0	0	0	0	0	0	0	0	0	0	0	0	0	5	2	79	3	2	1	1	3	0	0	1.6602	2.6903	1	4	1	4	4	43	30	30	14	3360	75	98	84	78	109	96	28	53	45	45	72	62	10
7574	0	1	0	0	0	0	0	0	0	0	0	0	0	0	4	1	44	4	2	2	1	3	1	1	2.8422	6.3458	1	23	2	14	2	83	61	38	13	405	101	125	107	82	153	107	33	129	67	45	135	77	14
7596	0	0	0	0	0	0	0	0	0	0	0	0	0	0	4	1	67	3	2	1	1	1	0	0	2.7898	6.9493	1	4	2	8	4	95	81	56	7	1405	65	134	107	73	130	102	32	65	50	46	123	69	14
7600	0	0	0	0	0	0	0	1	0	0	0	0	0	0	4	2	55	2	#NULL!	1	1	3	1	0	1.7454	29.8674	1	26	2	10	4	75	44	35	9	1145	85	92	90	97	123	108	23	45	39	48	71	62	10
7602	0	0	0	0	0	0	0	0	0	0	0	0	0	0	4	1	42	4	4	1	1	3	0	0	1.9673	2.8333	1	3	1	2	3	46	37	22	15	2185	61	115	76	95	140	113	41	72	56	59	95	75	15
7604	0	0	0	0	0	0	0	1	0	0	0	0	0	0	4	2	78	3	#NULL!	1	1	3	0	0	1.8502	1.3299	1	10	1	4	3	32	36	34	15	1435	78	98	90	95	149	126	50	82	63	66	94	79	14
7607	0	0	0	0	0	0	0	0	0	0	0	1	0	0	4	1	34	2	2	1	1	3	0	0	10.9673	19.991	0	-4	1	3	2	52	22	32	14	2330	59	112	83	98	151	128	23	100	49	56	114	76	21
7612	0	0	0	0	0	0	0	0	0	0	0	0	0	0	4	1	74	3	4	2	1	2	0	0	0.6909	9.1458	1	10	1	4	3	40	31	23	15	492	82	102	93	89	134	113	32	47	39	52	78	65	16
7613	1	1	0	0	0	0	0	1	0	0	0	0	0	0	4	2	68	3	4	1	1	3	0	0	37.3097	37.2889	0	30	2	9	2	87	56	47	11	158	64	79	68	95	140	116	35	63	49	53	102	68	15
7621	0	0	0	0	0	0	0	0	0	0	0	0	0	0	3	2	68	3	4	1	1	3	0	0	1.5124	17.7694	1	5	1	4	2	18	22	24	14	1360	63	84	71	129	183	154	38	71	51	68	103	85	15
7624	0	0	0	0	0	0	0	0	0	0	0	0	0	0	4	1	57	4	2	1	1	3	0	0	1.2202	17.9069	0	5	1	4	4	48	33	36	7	4490	104	134	117	119	156	138	54	84	68	77	107	91	15
7632	0	0	0	0	0	0	0	0	0	0	0	0	0	0	2	2	57	4	2	1	1	2	0	0	5.9153	15.1708	0	3	1	3	3	20	26	25	15	2665	76	96	87	96	155	123	48	71	57	66	100	78	13
7650	0	1	0	0	0	0	0	0	0	0	0	0	0	0	4	2	44	3	4	1	1	3	0	0	16.4213	27.5604	1	14	1	10	4	57	35	32	15	1155	76	122	94	84	145	109	43	76	58	59	99	73	17
7681	0	0	0	0	0	0	0	0	0	0	0	0	0	0	3	2	49	2	4	2	1	3	0	0	2.7156	6.8667	0	14	1	6	3	31	20	23	14	2900	63	96	76	97	143	118	45	76	63	63	99	82	10
7683	0	0	0	0	0	0	1	0	0	0	0	0	0	0	4	2	76	3	4	1	1	1	1	0	20.8795	22.8826	1	16	2	3	4	65	59	31	8	2100	78	127	92	79	127	114	58	83	68	70	114	84	14
7700	0	0	0	0	0	0	0	0	0	0	0	0	0	0	4	2	38	3	4	1	1	1	0	0	8.6749	16.675	0	5	1	4	3	19	22	29	15	2630	56	92	77	77	132	105	47	64	57	58	85	73	10
7712	0	0	0	0	0	0	0	0	0	0	0	0	0	1	4	1	49	4	2	1	1	3	1	0	0.374	52.6243	1	19	1	5	4	77	43	51	15	500	123	154	142	114	135	123	71	93	82	85	107	95	29
7728	0	0	0	0	0	0	0	0	0	0	0	0	0	0	5	2	49	4	2	1	1	3	1	1	5.3944	6.6479	1	19	1	9	3	68	59	34	15	1922	66	123	85	65	153	103	24	94	61	39	113	75	19
7730	0	0	0	0	0	0	0	0	0	0	0	0	0	1	4	1	30	4	4	1	1	2	1	1	0.3354	0.4028	1	9	1	11	3	86	45	41	15	245	98	136	118	59	129	92	30	76	56	47	92	70	14
7742	0	0	0	0	0	0	0	0	0	0	0	0	0	0	4	2	49	4	1	1	1	3	0	0	7.814	20.2535	1	9	1	4	4	60	28	31	15	1910	94	155	117	73	177	119	31	95	60	45	122	80	16
7752	0	1	0	0	0	0	0	0	0	0	0	0	0	0	2	2	31	2	4	2	1	3	0	0	1.0268	9.9194	1	24	1	3	3	31	21	25	15	2935	79	108	96	114	131	122	48	71	63	71	90	83	19
7755	0	0	0	0	0	0	0	0	0	0	0	0	0	0	4	1	44	2	4	1	1	3	0	0	6.295	19.0056	0	18	1	10	4	72	40	39	6	2910	57	113	87	111	150	135	66	95	80	83	110	98	12
7757	0	0	0	0	0	0	0	1	0	0	0	0	0	0	4	1	59	4	4	1	1	3	0	0	8.6016	42.6736	0	-3	1	3	4	50	28	30	15	820	85	119	100	112	202	141	55	92	68	74	121	92	13
7758	0	0	0	0	0	0	0	0	0	0	0	0	0	0	4	2	56	3	2	1	1	3	0	0	1.9097	7.1507	1	23	1	2	3	25	39	35	15	1200	73	107	89	96	176	134	51	85	65	74	113	88	12
7778	0	0	0	0	0	0	0	1	0	0	0	0	0	0	4	2	77	3	2	3	1	3	0	0	2.2587	7.4333	1	13	1	6	3	64	53	43	15	670	57	89	69	61	186	122	35	67	53	42	107	75	12
7784	0	0	0	0	0	0	0	1	0	0	0	0	0	0	4	1	70	3	2	1	1	3	0	0	8.9448	12.9118	0	33	2	5	3	42	35	33	12	2235	82	120	97	92	158	118	38	90	57	56	111	77	14
7798	0	0	0	0	0	0	0	0	0	0	0	0	0	0	2	2	50	2	2	1	1	3	0	0	3.898	11.041	0	0	1	5	2	37	27	39	14	2900	88	117	99	94	125	110	45	83	65	59	89	75	18
7801	0	0	0	0	0	0	0	0	0	0	0	0	0	0	1	1	60	2	2	1	1	1	0	0	7.9566	40.734	0	11	1	4	4	73	44	40	15	2744	105	173	142	55	133	92	13	96	47	2	111	60	16
7809	0	0	0	0	0	0	0	0	0	0	0	0	0	0	2	1	56	2	1	11	1	3	0	0	0.9421	5.2042	0	0	1	3	2	41	31	29	14	2390	95	120	105	95	171	126	50	85	67	61	99	81	9
7842	1	1	0	0	0	0	0	1	0	0	0	0	0	0	4	2	71	4	2	1	1	3	0	0	18.1075	19.7181	1	12	1	11	4	45	39	31	15	1584	86	123	100	81	146	109	42	78	55	57	103	75	18
7853	0	1	0	0	0	0	0	0	0	0	0	0	0	0	2	1	77	3	4	1	1	3	0	0	2.6836	4.9313	1	5	1	7	3	61	49	33	15	687	104	132	118	75	161	113	40	78	60	53	98	74	11
7861	0	1	0	0	0	0	0	0	0	0	0	0	0	0	3	2	25	1	4	1	1	1	0	0	5.821	11.6125	0	5	1	9	4	51	30	41	15	1755	83	120	95	84	152	109	42	94	53	53	121	69	3
7866	0	0	0	0	0	0	0	1	0	0	0	0	0	0	4	1	64	2	1	2	1	3	0	0	3.1971	7.784	0	7	1	4	3	47	31	31	15	1205	101	127	111	113	151	132	43	87	71	64	100	89	16
7884	0	0	0	0	0	0	0	0	0	0	0	0	0	0	4	2	59	2	2	1	1	3	0	0	0.8166	7.0861	1	16	1	6	4	62	36	30	14	1250	100	109	105	63	139	104	28	90	63	51	97	73	12
7888	1	1	0	0	0	0	0	0	0	0	0	1	0	0	1	2	49	2	2	1	1	1	0	0	17.9274	46.9674	0	29	1	4	4	38	34	33	15	1890	84	121	103	97	198	147	58	163	85	70	180	102	7
7897	0	1	0	0	0	0	0	1	0	0	0	0	0	0	3	1	80	3	#NULL!	1	1	3	0	0	8.1017	10.0292	0	18	1	13	3	73	59	41	15	2280	60	123	91	62	150	105	14	106	55	36	121	73	15
7908	0	0	0	0	0	0	0	0	0	0	0	0	0	0	4	2	46	4	2	3	1	3	0	0	2.4969	6.0333	0	19	1	11	4	62	43	21	15	992	71	98	82	67	111	90	24	72	54	39	234	71	11
7921	1	0	0	0	0	0	0	0	0	0	0	0	0	0	4	2	49	4	2	1	1	3	0	0	1.7321	6.9618	1	5	1	4	4	33	28	28	15	2905	83	130	101	81	152	107	37	79	56	51	105	72	10
7939	0	0	0	0	0	0	0	0	0	0	0	0	0	0	4	2	42	4	1	1	1	2	0	0	11.4323	24.5514	0	10	1	2	3	28	27	30	15	1939	104	116	109	92	150	109	54	84	65	65	95	76	9
7948	0	0	0	0	0	0	0	1	0	0	0	0	0	0	4	1	55	4	2	1	1	3	1	1	4.1812	5.7743	1	25	1	8	3	62	51	34	15	2160	95	119	106	86	131	102	50	77	64	63	99	79	18
7949	0	0	0	0	0	0	0	0	0	0	0	0	0	0	3	1	50	2	2	1	1	1	0	0	3.7793	24.9944	1	19	1	4	2	29	29	31	15	1755	75	126	96	102	136	119	50	75	65	69	162	86	11
7950	0	0	0	0	0	0	0	0	0	0	0	0	0	0	4	2	21	4	4	1	1	2	0	0	13.5352	17.7132	0	0	1	5	4	34	29	30	15	2050	106	131	118	95	178	124	43	99	68	64	116	83	10
7971	0	0	0	0	0	0	0	1	0	0	0	0	0	0	5	2	76	3	#NULL!	1	1	3	0	0	1.9712	13.116	1	10	1	7	4	43	45	35	14	1785	88	105	97	90	150	126	50	64	58	65	92	79	10
7973	1	0	0	0	0	0	0	1	0	0	0	0	0	0	4	1	78	3	#NULL!	1	1	1	0	0	2.9263	8.325	1	12	1	4	2	22	31	28	15	3045	102	121	113	89	160	113	50	93	62	65	117	80	12
7977	0	1	0	0	0	0	0	0	0	0	0	0	0	1	4	1	61	3	1	1	1	3	1	1	2.2439	2.95	1	23	2	9	3	56	81	49	8	515	69	110	90	61	137	106	11	104	48	37	282	73	22
7985	0	0	0	0	0	0	0	1	0	0	0	0	0	0	4	1	51	4	2	1	1	3	0	0	28.2753	126.271	1	7	1	14	4	127	81	48	14	26	118	178	131	56	143	101	14	105	56	31	115	71	17
7987	0	0	0	0	0	0	0	0	0	0	0	0	0	0	4	1	59	4	2	1	1	3	1	1	3.2774	7.9389	1	12	1	4	4	42	56	43	15	762	80	107	92	59	135	98	41	75	55	50	96	71	12
7990	1	0	0	0	0	0	0	0	0	0	0	0	0	1	4	2	80	3	2	1	1	3	1	1	0.7681	0.8215	1	25	1	14	3	115	88	49	15	100	25	87	70	50	108	79	10	84	41	23	89	51	15
8014	0	0	0	0	0	0	0	1	0	0	0	0	0	0	3	1	30	5	4	1	1	3	0	0	16.7825	39.7924	1	18	1	8	2	55	29	29	15	5450	66	87	76	74	132	102	40	89	62	49	98	71	7
8016	0	0	0	0	0	0	0	0	0	0	0	0	0	0	4	1	80	2	1	1	1	1	0	0	7.0373	12.7278	0	5	1	6	4	33	42	36	15	1165	62	91	77	93	141	112	43	63	53	59	90	72	6
8036	0	0	0	0	0	0	0	0	0	0	0	0	0	0	4	1	46	2	#NULL!	1	1	3	0	0	4.7678	7.6799	0	4	2	7	4	30	27	36	13	1515	92	120	108	91	184	131	47	107	77	57	125	90	12
8039	0	0	0	0	0	0	0	0	0	0	0	0	0	0	4	1	64	1	#NULL!	1	1	2	0	0	0.8514	10.0389	0	0	2	3	3	40	29	28	11	1430	88	116	101	98	157	129	57	88	69	71	106	89	11
8046	0	0	0	0	0	0	0	0	0	0	0	0	0	0	5	2	60	4	2	1	1	1	0	0	2.7172	11.9167	1	12	1	5	4	41	21	26	13	2462	103	126	114	117	147	130	35	82	55	64	104	80	19
8060	0	0	0	0	0	0	0	0	0	0	0	0	0	0	4	1	48	4	2	1	1	2	0	0	2.5998	15.2847	1	11	1	8	2	42	32	26	15	621	56	94	75	117	152	131	60	83	71	78	118	95	9
8068	0	0	0	0	0	0	0	0	0	0	0	0	0	0	4	2	44	4	4	1	1	3	0	0	1.9385	3.6056	1	19	1	5	3	19	28	31	15	930	69	92	79	116	191	140	30	114	76	80	116	91	16
8070	0	0	0	0	0	0	0	0	0	0	0	0	0	0	4	2	59	1	2	1	1	3	0	0	1.9474	2.7681	1	7	1	3	1	54	31	22	15	3795	50	80	66	80	141	107	33	68	49	51	91	67	8
8073	0	0	0	0	0	0	0	1	0	0	0	0	0	0	3	1	52	3	1	3	1	3	0	0	1.1455	2.8597	0	17	1	4	2	38	23	19	15	4860	69	103	82	97	134	109	35	73	51	56	93	71	13
8081	0	0	0	0	0	0	0	1	0	0	0	0	0	0	4	2	70	3	2	2	1	3	0	0	3.8653	3.8361	1	17	1	3	1	34	32	35	15	1320	55	72	61	103	160	135	45	67	51	64	91	79	14
8109	0	0	0	0	0	0	0	0	0	0	0	0	0	0	4	1	59	4	4	1	1	3	0	0	1.8652	3.8868	0	5	1	9	4	52	41	47	14	2075	51	92	76	98	125	109	38	56	47	56	83	68	2
8112	0	0	0	0	0	0	0	0	0	0	0	0	0	0	5	1	70	3	2	1	1	1	0	0	12.9884	19.8986	0	3	1	2	4	33	42	36	15	1490	86	131	97	90	152	123	50	80	57	65	99	81	14
8116	0	0	0	0	0	0	0	0	0	0	0	0	0	0	4	1	55	3	1	1	1	3	0	0	2.7477	4.8153	0	11	1	8	2	53	29	31	15	1470	78	94	86	106	147	121	58	80	68	76	102	88	17
8117	0	0	0	0	0	0	0	0	0	0	0	0	0	0	4	1	37	4	4	1	1	2	0	0	5.8635	8.0701	0	0	1	8	4	65	34	22	15	1485	62	95	83	66	169	121	7	91	62	24	121	81	15
8143	0	0	0	0	0	0	0	0	0	0	0	0	0	0	4	2	28	5	4	1	1	3	0	0	2.8555	5.4778	0	5	1	2	4	66	33	25	15	3255	103	133	118	97	123	112	56	80	65	72	90	81	7
8167	0	1	0	0	0	0	0	0	0	0	0	0	0	1	4	2	56	2	#NULL!	2	1	3	1	1	1.4818	1.4222	1	19	1	17	4	92	65	54	15	678	93	119	108	32	206	113	13	108	62	17	109	74	5
8196	0	0	0	0	0	0	0	0	0	0	0	1	0	0	2	2	71	2	2	1	1	1	1	0	3.4939	27.7125	1	5	1	8	3	67	56	41	15	682	80	125	95	89	168	116	19	60	42	45	84	63	17
8199	0	1	0	0	0	0	0	0	0	0	0	0	0	0	2	2	45	3	4	1	1	3	0	0	16.7737	21.5236	0	16	1	5	4	56	42	45	15	3849	103	132	115	70	154	100	33	125	60	55	156	74	22
8205	0	0	0	0	0	0	0	0	0	0	0	0	0	0	4	1	54	2	4	1	1	3	0	0	1.8973	6.9764	0	21	1	2	4	57	36	34	14	1745	71	101	83	100	142	116	58	80	66	75	103	84	14
8207	0	0	0	0	0	0	0	0	0	0	0	0	0	0	5	1	57	4	2	1	1	3	0	0	25.1516	32.1528	0	-1	1	8	4	67	40	44	15	2297	76	141	104	78	167	112	41	144	59	52	152	76	20
8209	0	0	0	0	0	0	0	0	0	0	0	0	0	0	4	1	78	3	#NULL!	1	1	3	0	0	0.812	6.85	1	6	1	3	3	41	29	32	12	1003	52	83	65	104	148	134	23	107	52	64	115	79	13
8210	1	0	0	0	0	0	0	1	0	0	0	0	0	0	4	2	79	3	2	1	1	3	1	0	6.2123	9.9986	1	12	1	6	3	27	33	34	15	1460	75	103	86	116	205	163	45	88	63	69	126	92	7
8213	0	1	0	0	0	0	0	0	0	0	0	0	0	0	4	1	60	4	4	1	1	3	0	0	6.8664	26.4847	0	5	1	3	3	54	25	41	15	2235	72	123	86	99	241	130	50	122	67	67	167	89	15
8227	1	0	0	0	0	0	0	0	0	0	0	0	0	0	4	1	74	3	2	1	1	2	0	0	2.3276	19.3646	0	10	1	2	3	46	19	30	14	4625	78	129	98	109	144	127	36	68	50	59	90	75	4
8231	1	0	0	0	0	0	0	1	0	0	0	0	0	1	3	1	74	3	#NULL!	2	1	3	0	0	7.042	27.109	1	20	1	7	1	83	53	44	15	520	46	57	50	58	108	88	15	52	38	34	66	54	4
8255	0	1	0	0	0	0	0	0	0	0	0	0	0	0	4	1	80	3	#NULL!	1	1	2	0	0	0.9729	3.7576	1	3	2	5	4	38	42	35	12	1045	67	97	83	96	186	142	31	76	53	53	109	82	15
8258	1	0	0	0	0	0	0	1	0	0	0	0	0	0	4	1	71	3	2	1	1	3	0	0	3.944	13.7632	1	12	1	2	3	21	32	23	14	2435	66	120	83	89	159	121	48	86	64	66	105	85	14
8266	0	0	0	0	0	0	0	0	0	0	0	0	0	0	2	2	59	2	#NULL!	1	1	3	0	0	1.0551	3.9493	0	17	1	2	3	39	37	28	15	800	84	103	94	93	109	98	48	71	57	60	82	68	13
8271	0	0	0	0	0	0	0	0	0	0	0	0	0	0	4	1	70	3	1	1	1	3	0	0	4.8295	8.6354	1	0	1	2	3	44	36	24	15	2490	95	117	107	98	138	120	33	65	54	64	86	76	10
8273	0	0	0	0	0	0	0	0	0	0	0	0	0	0	4	2	66	3	2	2	1	3	0	0	2.2757	8.3542	0	16	1	7	3	41	12	17	15	2493	88	109	99	120	166	140	56	83	68	80	230	99	14
8296	1	0	0	0	0	0	0	0	0	0	0	0	0	0	4	1	80	3	4	1	1	1	0	0	3.7132	13.2639	1	17	1	4	4	57	54	40	11	875	72	140	91	106	158	134	49	97	70	68	113	91	10
8311	0	0	0	0	0	0	0	0	0	0	0	0	0	0	4	2	63	4	2	2	1	3	1	0	1.0242	2.9736	1	21	1	3	4	38	36	28	15	#NULL!	121	138	127	92	130	110	38	74	54	58	91	72	22
8331	0	0	1	0	0	0	0	1	0	0	0	0	0	0	4	2	63	4	2	1	1	3	0	0	7.1692	10.6674	1	24	2	5	3	43	49	50	13	940	71	124	99	81	144	112	43	79	61	56	101	78	16
8336	0	0	0	0	0	0	0	0	0	0	0	0	0	0	5	1	77	3	4	1	1	3	0	0	1.946	4.8681	0	6	1	2	3	28	30	30	15	3325	76	108	85	91	120	107	36	73	47	55	87	67	16
8337	1	0	0	0	0	0	0	0	0	0	0	0	0	0	4	2	45	3	4	2	1	3	0	0	1.2655	10.3611	0	15	1	5	4	60	36	27	15	961	84	110	92	94	125	112	56	80	66	67	88	76	12
8339	0	1	1	0	0	0	0	1	0	0	0	0	0	0	4	1	65	3	2	1	1	3	0	0	22.6712	22.6604	1	9	1	6	4	60	43	35	15	4430	100	121	110	96	222	159	39	109	72	57	153	97	14
8340	1	1	0	0	0	0	0	0	0	0	0	0	0	0	4	1	77	3	2	1	1	3	0	0	1.944	3.8458	0	10	1	4	4	31	30	24	15	1965	80	101	88	84	117	99	37	72	53	57	85	68	14
8359	0	0	0	0	0	0	0	0	0	0	0	0	0	0	4	1	77	3	#NULL!	1	1	2	0	0	2.7605	6.9111	1	5	1	3	4	48	31	31	14	680	76	101	92	104	139	123	46	76	65	68	96	84	13
8370	0	0	0	0	0	0	0	1	0	0	0	0	0	0	4	1	72	3	4	2	1	3	1	1	15.5968	15.5	1	10	2	11	4	115	77	54	10	222	106	136	115	65	112	93	39	67	49	49	78	62	21
8393	0	0	0	0	0	0	0	0	0	0	0	0	0	0	4	2	68	3	2	2	1	1	0	0	4.5527	15.6375	0	11	2	4	4	44	40	41	9	3720	70	126	84	90	173	136	31	85	61	57	113	86	12
8422	0	0	1	0	0	0	0	0	0	0	0	0	0	0	5	2	71	3	2	1	1	3	0	0	5.2988	11.0639	0	10	1	3	3	43	43	33	15	756	70	121	86	97	146	121	42	73	55	62	94	77	19
8427	0	0	0	0	0	0	0	0	0	0	0	0	0	0	4	2	64	3	2	2	1	1	0	0	1.5821	6.3194	1	0	1	5	4	25	28	24	15	2665	59	117	93	84	166	116	36	131	68	52	140	86	12
8451	0	0	0	0	0	0	0	0	0	0	0	0	0	0	4	2	51	2	1	1	1	3	1	1	2.945	9.5396	1	19	1	4	2	49	22	36	15	5260	107	128	118	81	144	112	28	77	54	46	98	73	18
8452	0	1	0	0	0	0	0	1	0	0	0	0	0	0	4	2	54	3	2	2	1	3	0	0	5.1035	7.0667	1	26	1	10	2	67	42	42	15	655	47	67	57	76	161	111	50	85	64	56	105	76	14
8471	0	0	0	0	0	0	0	0	0	0	0	0	0	0	4	1	34	3	4	2	1	3	0	0	5.4041	5.4049	0	5	1	2	4	40	14	29	15	1815	90	117	102	94	133	107	19	51	38	45	78	61	15
8472	0	0	0	0	0	0	0	1	0	0	0	0	0	0	2	1	64	4	#NULL!	1	1	1	0	0	46.3403	54.2139	1	7	1	2	3	34	33	35	15	2535	55	89	71	84	151	128	44	106	66	54	113	84	12
8475	0	0	0	0	0	0	0	1	0	0	0	0	0	0	4	1	78	3	#NULL!	1	1	3	1	1	20.9284	41.9201	1	22	1	7	4	37	56	49	15	402	87	114	99	81	157	108	45	135	71	59	151	87	14
8481	0	0	0	0	0	0	0	0	0	0	0	0	0	0	4	2	67	4	2	1	1	2	0	0	6.0371	19.7521	1	17	1	4	4	49	41	43	15	3110	46	138	105	75	193	109	38	73	61	46	104	76	15
8485	0	1	0	0	0	0	0	0	0	0	0	0	0	0	4	2	78	3	4	1	1	2	1	0	1.4853	10.2993	1	12	1	6	3	38	53	23	15	2810	71	103	82	0	139	108	35	77	59	59	92	79	19
8489	0	1	0	0	0	0	0	0	0	0	0	0	0	0	2	2	72	3	4	1	1	3	0	0	2.3669	5.9736	1	14	2	12	4	71	61	36	5	3155	48	92	61	78	166	119	28	71	48	45	103	71	12
8507	0	0	0	0	0	0	0	0	0	0	0	0	0	0	2	1	67	3	1	2	1	1	0	0	1.1254	4.1049	1	1	1	5	2	64	31	31	15	#NULL!	68	89	78	82	133	106	13	77	39	38	95	61	5
8511	0	0	0	0	0	0	0	0	0	0	0	0	0	0	4	1	70	3	1	1	1	3	0	0	1.1855	3.9896	1	-5	1	2	3	52	31	36	15	1075	66	93	78	83	161	109	32	100	43	53	120	65	10
8512	0	1	0	0	0	0	0	0	0	0	0	0	0	0	4	2	60	4	2	1	1	3	0	0	2.9701	8.1319	0	0	1	2	3	43	21	30	15	5150	73	107	80	82	150	111	39	90	58	56	110	75	14
8517	1	0	0	0	0	0	0	1	0	0	0	0	0	0	2	1	78	3	#NULL!	1	1	3	0	0	2.49	6.0535	0	22	2	5	4	61	43	52	13	1444	66	155	107	97	177	135	27	87	45	60	99	75	12
8525	0	0	0	0	0	0	0	0	0	0	0	0	0	0	5	2	76	3	2	1	1	3	0	0	4.3746	21.7417	1	21	2	8	1	54	47	37	9	435	45	58	50	74	180	112	22	77	41	40	88	65	20
8559	1	0	0	0	0	0	0	0	0	0	0	0	0	1	4	2	63	4	2	2	1	3	0	0	9.1147	13.9264	1	12	1	3	3	24	30	25	14	1470	82	99	91	124	160	142	67	95	79	85	107	93	17
8561	0	0	0	0	0	0	0	0	0	0	0	0	0	0	4	2	57	4	2	1	1	3	0	0	5.1899	21.2889	0	3	1	3	4	40	25	19	15	4300	81	112	93	104	147	128	53	90	71	70	107	90	14
8563	0	0	0	0	0	0	0	0	0	0	0	0	0	0	4	1	70	3	#NULL!	1	1	1	1	1	2.1467	2.1382	1	7	2	15	4	99	81	61	10	94	67	165	112	63	229	102	37	115	61	48	147	74	5
8641	0	0	0	0	0	0	0	1	0	0	0	0	0	0	4	1	44	2	4	1	1	2	0	0	2.3248	7.0764	0	7	1	7	3	26	30	27	15	1690	54	84	67	119	155	137	57	91	72	78	113	94	8
8668	1	0	0	0	0	0	0	1	0	0	0	0	0	0	4	1	75	3	#NULL!	2	1	3	0	0	3.0358	5.9507	1	12	1	3	4	35	30	26	15	2620	70	106	85	70	138	105	38	78	54	50	98	71	13
8670	0	0	0	0	0	0	0	1	0	0	0	0	0	0	4	2	71	3	2	2	1	3	0	0	1.976	11.0632	1	15	1	2	3	37	27	30	15	4820	73	89	81	104	156	133	32	94	53	54	97	71	14
8674	0	1	0	0	0	0	0	0	0	0	0	0	0	0	4	2	54	4	1	3	1	3	0	0	2.8508	21.8153	1	23	2	10	2	65	38	29	13	1100	76	90	85	90	112	98	41	60	54	52	71	64	15
8678	0	0	0	0	0	0	0	1	0	0	0	0	0	0	4	1	72	3	2	1	1	2	0	0	2.8851	6.8604	1	9	1	3	2	40	31	23	15	1836	59	89	73	71	185	131	30	66	45	45	101	71	12
8682	0	0	0	0	0	0	0	0	0	0	0	0	0	0	4	1	63	2	2	1	1	1	0	0	25.528	29.0451	1	5	1	4	2	33	28	32	15	7370	54	93	75	80	163	127	33	81	58	49	109	78	12
8695	0	1	0	0	0	0	0	1	0	0	0	0	0	0	4	1	75	3	2	1	1	3	0	0	0.8442	5.9153	1	14	1	2	2	44	26	35	15	1041	98	118	110	94	141	114	31	85	46	54	95	68	28
8717	0	0	0	0	0	0	0	1	0	0	0	0	0	0	4	1	52	5	2	1	1	3	0	0	8.6869	12.5194	0	23	1	4	3	47	27	28	15	3180	93	111	100	90	133	105	26	66	50	49	85	69	11
8722	0	0	0	0	0	0	0	0	0	0	0	0	0	0	4	1	46	4	2	1	1	3	1	1	5.5719	5.6278	1	12	1	8	4	62	48	38	15	2525	70	137	109	73	196	111	42	124	67	58	228	106	20
8734	0	0	0	0	0	0	0	1	0	0	0	0	0	0	4	2	47	3	4	4	1	3	0	0	5.3215	9.0604	1	17	1	4	3	39	38	26	15	#NULL!	61	74	66	100	167	133	56	88	72	73	115	94	15
8753	1	0	0	0	0	0	0	0	0	0	0	0	0	0	4	2	66	3	2	1	1	3	0	0	1.3179	2.2076	0	3	1	3	3	41	36	25	15	1465	57	122	80	95	122	104	42	62	53	57	76	65	16
8765	0	0	0	0	0	0	0	0	0	0	0	0	0	0	1	1	66	3	3	1	1	1	0	0	2.7665	7.4097	0	11	1	2	4	43	38	36	14	1605	86	121	102	86	184	139	52	78	66	63	112	91	12
8784	0	0	0	0	0	0	0	0	0	0	0	0	0	0	4	1	34	4	4	1	1	3	0	0	1.6646	5.9833	0	-3	1	6	2	40	22	31	14	2575	75	134	93	83	132	116	59	90	79	67	102	91	16
8791	0	0	0	0	0	0	0	1	0	0	0	0	0	0	4	1	66	3	4	1	1	3	0	0	3.95	8.5069	1	8	2	2	4	55	41	33	13	3615	90	138	121	78	212	162	55	152	98	63	159	119	13
8799	0	0	0	0	0	0	0	1	0	0	0	0	0	0	4	1	36	4	3	10	1	3	0	0	4.288	6.0451	0	14	1	3	3	49	22	29	14	1100	107	128	119	106	188	159	52	134	93	64	148	109	9
8815	1	1	0	0	0	0	0	0	0	0	0	0	0	0	2	1	70	3	2	1	1	3	1	1	10.979	17.375	1	29	1	3	3	51	42	31	15	1025	47	125	91	92	116	103	40	67	52	58	81	69	15
8817	0	1	0	0	0	0	0	1	0	0	0	0	0	1	4	1	54	4	1	1	1	3	0	0	2.8533	9.709	0	10	1	7	4	34	21	25	15	3710	98	122	111	103	135	119	62	90	76	76	103	91	18
8841	0	1	0	0	0	0	0	0	0	0	0	0	0	0	5	1	50	4	2	1	1	3	1	1	4.041	4.8646	1	16	1	10	4	93	64	41	15	1265	97	143	115	69	147	94	43	75	54	54	100	69	20
8866	0	0	0	0	0	0	0	0	0	0	0	0	0	0	4	1	69	3	2	1	1	1	0	0	7.846	10.6861	0	0	1	2	3	38	28	28	14	2695	79	97	86	75	126	102	32	62	47	51	81	67	12
8876	0	0	0	0	0	0	0	0	0	0	0	0	0	0	4	2	70	3	#NULL!	1	1	1	0	0	4.566	22.1007	1	20	1	7	1	43	49	25	15	1912	60	85	73	102	146	117	49	66	54	67	97	77	12
8887	0	1	0	0	0	0	0	0	0	0	0	0	1	0	4	1	75	3	2	2	1	1	0	0	3.375	35.0368	1	24	1	3	4	40	49	35	15	1384	67	98	80	83	144	112	35	63	49	49	92	70	16
8894	0	1	0	0	0	0	0	0	0	0	0	0	0	0	4	2	72	3	#NULL!	1	1	1	0	0	1.3161	7.4597	1	13	2	5	3	53	37	34	10	765	73	86	80	93	137	118	37	85	55	56	102	76	23
8896	0	0	0	0	0	0	0	0	0	0	0	0	0	0	2	2	74	3	#NULL!	3	1	3	0	0	3.7784	5.6972	1	14	1	5	2	27	38	32	15	1885	59	72	64	99	127	116	41	57	49	61	81	72	7
8898	0	1	0	0	0	0	0	0	0	0	0	0	0	0	4	2	51	3	4	1	1	3	1	0	12.4541	25.4132	1	30	1	7	4	55	39	30	15	3990	80	156	109	75	152	106	40	75	62	56	101	79	19
8900	1	0	0	0	0	0	0	1	0	0	0	0	0	0	4	2	78	3	2	1	1	3	0	0	0.8127	5.9132	0	18	1	6	3	47	40	37	14	691	76	128	87	124	159	141	60	104	77	83	116	98	17
8904	0	0	0	0	0	0	0	1	0	0	0	0	0	0	4	2	50	3	#NULL!	1	1	1	0	0	9.1029	19.9924	1	26	1	10	4	72	50	42	15	821	79	111	97	82	128	103	41	84	54	46	94	69	14
8914	0	0	0	0	0	0	0	0	0	0	0	0	0	0	2	1	30	4	4	1	1	2	0	0	38.5966	38.5521	0	5	1	4	3	50	25	31	15	2440	59	90	75	94	159	132	34	89	66	58	108	91	13
8915	0	1	0	0	0	0	0	1	0	0	0	0	0	0	4	2	56	3	2	1	1	3	1	0	21.9321	27.3215	1	28	1	9	4	73	58	42	15	1075	96	120	110	66	162	116	42	78	61	49	105	77	12
8927	0	1	0	0	0	0	0	0	0	0	0	0	0	0	4	1	66	4	2	1	1	3	0	0	1.7454	27.5771	1	17	1	4	3	41	34	22	15	1910	64	98	79	87	137	104	38	69	56	57	88	72	14
8928	0	0	0	0	0	0	0	0	0	0	0	0	0	0	4	2	36	3	1	1	1	3	0	0	4.1694	5.025	0	-7	2	5	3	42	18	27	9	2190	74	107	87	95	133	111	51	74	63	66	92	79	10
8933	0	1	0	0	0	0	0	0	0	0	0	0	0	0	4	1	67	3	4	1	1	3	1	1	0.963	0.8097	1	11	2	11	3	136	90	54	4	267	127	141	134	56	100	81	25	55	42	36	69	55	10
8947	0	0	0	0	0	0	0	0	0	0	0	0	0	0	2	1	54	2	1	3	1	3	0	0	9.3758	21.3299	1	22	1	9	4	61	35	43	14	506	85	116	94	81	137	108	33	78	55	50	104	75	6
8952	0	1	0	0	0	0	0	0	0	0	0	0	0	0	4	2	55	4	2	1	1	2	1	1	8.9657	37.3778	1	4	1	13	4	72	49	32	15	2660	98	124	106	76	135	104	34	80	48	48	98	66	14
8984	0	0	0	0	0	0	0	0	0	0	0	0	0	0	4	1	39	2	4	1	1	3	0	0	10.0416	27.5951	0	14	1	11	1	26	34	36	15	473	68	88	76	103	123	114	45	71	59	66	87	78	12
8985	1	0	0	0	0	0	0	1	0	0	0	0	0	0	4	2	75	3	2	1	1	3	0	0	2.3653	9.2264	1	20	1	6	3	25	22	18	15	3089	82	99	89	118	188	143	42	89	57	61	109	87	13
8987	0	0	0	0	0	0	0	0	0	0	0	0	0	0	4	2	80	4	2	1	1	3	0	0	2.504	10.5146	1	8	1	2	4	38	30	32	15	1915	71	99	86	88	115	99	39	56	47	57	67	61	21
8989	0	0	0	0	0	0	0	0	0	0	0	0	0	0	4	2	55	3	2	1	1	3	0	0	12.742	19.5465	1	0	1	3	3	27	32	38	15	2015	80	134	107	107	157	124	51	91	64	72	111	84	14
8990	0	0	0	0	0	0	0	0	0	0	0	0	0	0	2	1	47	3	4	3	1	1	0	0	2.1161	10.3813	0	2	1	8	3	40	32	24	15	#NULL!	93	116	104	97	125	109	52	74	61	69	100	80	12
8998	0	0	0	0	0	0	0	0	0	0	0	0	0	0	4	2	26	2	#NULL!	1	1	3	0	0	6.4924	9.3479	0	0	1	7	4	82	53	49	3	861	102	125	114	105	147	123	48	80	62	72	98	82	21
9002	1	1	0	0	0	0	0	1	0	0	0	0	0	0	4	2	73	3	2	3	1	1	1	0	4.7472	14.1632	1	23	1	10	3	81	63	25	15	3070	70	73	70	75	139	97	29	53	44	43	68	59	19
9004	0	1	0	0	0	0	0	0	0	0	0	0	0	0	2	1	46	2	4	1	1	3	1	1	3.9657	3.4451	1	19	2	10	3	100	57	36	6	1436	101	167	119	92	167	114	36	79	57	55	94	76	17
9016	0	0	0	0	0	0	1	1	0	0	0	0	0	0	4	2	77	3	2	3	1	3	0	0	10.4159	17.6715	1	26	1	4	3	32	33	33	15	2155	54	85	66	105	189	146	44	87	61	71	124	92	11
9021	1	0	0	0	0	0	0	0	0	0	0	0	0	0	5	2	55	4	2	1	1	3	0	0	20.7585	43.8208	1	16	2	8	4	79	52	30	13	785	101	129	115	91	131	114	45	91	75	64	101	88	16
9052	1	0	0	0	0	0	0	1	0	0	0	0	0	0	4	1	57	4	2	1	1	3	0	0	8.2413	39.0868	0	17	1	10	2	66	57	42	14	91	65	69	67	82	131	104	38	62	49	53	93	68	10
9053	0	0	0	0	0	0	0	0	0	0	0	0	0	0	4	1	24	4	4	1	1	2	0	0	2.2602	4.2903	0	0	1	2	3	31	13	22	10	5015	71	97	83	116	167	129	48	85	66	71	102	87	13
9054	0	0	0	0	0	0	0	0	0	0	0	0	0	0	4	2	72	3	2	2	1	3	0	0	7.9617	18.1076	1	16	1	2	3	40	28	29	14	4020	83	104	94	94	166	135	44	90	72	61	115	93	14
9063	0	1	0	0	0	0	0	0	0	0	0	0	0	0	4	2	73	3	#NULL!	1	1	3	0	0	2.6738	4.4986	0	15	1	5	3	49	43	25	15	2250	51	86	68	75	138	101	40	71	53	52	93	69	10
9064	1	1	0	0	0	0	0	1	0	0	0	0	0	0	4	2	61	3	1	2	1	3	0	0	2.9312	5.775	1	17	1	8	2	66	45	39	14	560	92	125	103	69	115	99	15	77	46	40	83	63	16
9068	0	0	0	0	0	0	0	0	0	0	0	0	0	0	4	1	78	3	2	1	1	2	0	0	4.8019	25.8139	1	6	1	2	3	49	42	23	15	2297	89	124	103	63	124	94	23	79	50	43	91	66	12
9086	0	0	0	0	0	0	0	0	0	0	0	0	0	0	4	2	50	4	2	1	1	3	1	1	4.1375	4.3861	1	14	1	7	4	44	43	30	15	4410	69	98	82	68	159	105	38	91	54	50	119	72	10
9090	1	0	0	0	0	0	0	0	0	0	0	0	0	0	4	2	78	3	2	2	1	3	1	1	1.8414	14.4688	1	21	2	8	4	65	51	30	11	0	61	101	71	93	152	130	41	93	57	63	103	83	14
9096	0	0	0	0	0	0	0	0	0	0	0	0	0	0	4	2	56	4	2	1	1	1	0	0	3.2404	5.0229	1	22	1	6	1	32	29	30	15	646	81	95	87	92	112	99	48	69	60	62	76	68	14
9100	0	0	0	0	0	0	0	0	0	0	0	0	0	0	4	2	56	3	2	1	1	3	0	0	1.732	1.6771	1	8	1	6	1	33	26	28	15	100	54	66	60	117	190	137	54	89	74	76	118	95	12
9101	0	0	0	0	0	0	0	0	0	0	0	0	0	0	4	2	56	2	4	1	1	3	0	0	3.3092	6.8792	0	16	1	11	2	56	31	25	12	1442	58	90	63	89	141	105	41	87	52	60	98	70	16
9115	0	0	0	0	0	0	0	0	0	0	0	0	0	0	4	2	49	4	2	1	1	2	0	0	4.7315	9.775	0	5	1	4	4	42	21	25	15	1610	104	116	110	82	154	107	46	64	53	57	112	70	11
9128	0	0	0	0	0	0	0	0	0	0	0	0	0	0	4	2	47	4	4	1	1	1	0	0	0.8128	70.4486	0	10	1	9	2	65	35	22	15	950	77	92	84	106	156	135	39	75	56	63	100	82	8
9130	0	0	0	0	0	0	0	0	0	0	0	0	0	0	2	1	60	3	#NULL!	1	1	3	1	1	7.3881	10.7458	1	10	1	8	3	77	50	39	14	613	94	135	117	76	126	102	24	54	33	1	69	54	13
9142	0	0	0	0	0	0	0	0	0	0	0	0	0	0	4	1	78	3	2	1	1	1	1	1	1.0527	1.0542	1	0	1	5	4	51	41	36	15	3175	62	98	78	77	160	125	45	84	62	57	116	85	12
9143	0	0	0	0	0	0	0	1	0	0	0	0	0	0	3	1	65	2	4	1	1	3	0	0	2.0066	5.034	1	15	1	9	2	54	37	27	11	2295	64	73	67	124	193	167	37	106	59	66	121	95	13
9166	0	0	0	0	0	0	0	0	0	0	0	0	0	0	4	1	27	4	3	1	1	2	0	0	1.0374	3.8757	0	-7	1	3	3	32	32	41	10	835	76	148	95	87	144	111	46	70	58	64	92	74	11
9206	0	1	0	0	0	0	0	0	0	0	0	0	0	0	5	2	66	3	4	1	1	3	0	0	16.2121	19.2389	1	11	1	10	4	47	35	34	15	3373	62	104	76	93	160	121	39	72	52	58	105	78	8
9208	0	1	0	0	0	0	0	1	0	0	0	0	0	0	5	2	49	4	#NULL!	1	1	3	0	0	0.8757	4.175	0	22	2	9	4	60	49	21	13	4130	66	94	81	80	125	97	41	77	55	57	91	69	9
9226	0	0	0	0	0	0	0	0	0	0	0	0	0	0	4	2	51	2	4	1	1	3	0	0	4.9535	6.0431	0	16	1	3	1	37	23	34	15	1350	80	120	96	101	151	126	62	96	76	74	110	88	7
9231	0	1	0	0	0	0	0	0	0	0	0	0	0	0	4	2	64	3	#NULL!	1	1	3	0	0	2.0481	4.7306	1	5	1	6	2	44	31	25	15	2860	56	82	67	83	134	100	15	103	50	50	113	67	11
9266	1	0	0	0	0	0	0	1	0	0	0	0	0	0	4	2	69	3	4	1	1	3	0	0	1.9379	11.6556	1	23	2	7	3	52	39	23	12	2334	66	93	78	93	127	105	36	74	49	56	87	67	8
9267	0	1	0	0	0	0	0	1	0	0	0	0	0	0	4	1	56	3	4	2	1	3	0	0	7.6644	7.6535	1	18	2	9	2	83	61	57	4	955	48	120	75	77	144	101	45	91	60	56	107	73	12
9272	0	1	0	0	0	0	0	0	0	0	0	0	0	0	2	2	71	3	4	1	1	3	0	0	1.9381	9.4597	1	14	1	5	3	56	40	23	15	2025	119	156	132	109	166	133	52	88	64	72	106	87	17
9274	0	0	0	0	0	0	0	0	0	0	0	0	0	0	4	2	63	4	2	4	1	3	0	0	1.8444	5.7208	0	-4	1	3	3	21	20	24	14	4410	66	93	78	104	181	145	52	115	78	73	123	95	13
9277	0	0	0	0	0	0	0	0	0	0	0	0	0	0	4	1	39	4	3	1	1	2	0	0	2.643	10.4799	0	0	1	3	4	45	26	47	15	970	80	122	98	84	140	108	42	91	69	60	118	86	1
9278	0	0	0	0	0	0	0	0	0	0	0	0	0	0	3	2	49	4	2	3	1	3	1	1	5.3506	9.5931	1	11	1	5	3	47	26	25	15	2085	90	114	102	68	117	97	35	67	51	50	109	67	15
9296	0	1	0	0	0	0	0	0	0	0	0	0	0	0	4	2	57	4	2	1	1	3	1	1	2.849	2.7479	1	21	1	15	4	83	61	49	15	310	73	93	83	91	130	108	44	65	54	56	86	72	15
9298	0	0	0	0	0	0	0	0	0	0	0	0	0	0	4	2	52	4	2	1	1	1	0	0	7.197	31.6826	1	-4	1	2	4	37	30	35	15	1263	76	114	91	78	145	106	36	78	53	54	274	77	8
9304	0	0	0	0	0	0	0	1	0	0	0	0	0	0	4	1	71	3	4	1	1	3	0	0	2.0981	12.8063	1	12	2	3	3	47	41	23	10	1875	60	89	70	91	184	120	38	90	60	60	111	80	26
9308	0	0	0	0	0	0	0	0	0	0	0	0	0	0	4	2	55	3	4	1	1	2	0	0	11.7022	24.15	0	-2	1	8	4	48	34	30	15	737	79	104	90	95	148	119	49	66	56	62	88	72	30
9328	0	0	0	0	0	0	0	0	0	0	0	0	0	0	4	2	33	4	4	1	1	3	0	0	19.9316	29.5125	0	3	1	5	4	55	23	36	14	120	74	156	101	118	179	147	60	95	77	78	112	98	12
9339	1	0	1	0	0	0	0	1	0	0	0	0	0	0	4	2	72	3	#NULL!	1	1	3	0	0	0.88	3.8014	0	5	1	3	3	29	33	26	15	1730	62	74	67	115	154	129	40	78	53	65	101	78	19
9341	0	1	0	0	0	0	0	0	0	0	0	0	0	0	4	1	63	4	2	1	1	3	0	0	25.1352	30.0465	0	0	1	9	4	89	51	42	15	883	80	121	93	70	112	96	32	61	50	13	78	65	14
9348	0	1	0	0	0	0	0	1	0	0	0	0	0	0	4	2	69	4	4	1	1	3	0	0	2.1322	8.7444	1	7	1	7	4	42	32	24	14	4413	67	101	81	71	165	103	35	99	53	46	109	67	13
9354	0	0	0	0	0	0	0	1	0	0	0	0	0	0	5	2	69	3	2	1	1	3	0	0	8.3284	31.8785	0	17	1	4	3	47	25	39	14	1437	83	110	97	86	114	98	44	71	53	60	85	68	18
9356	0	0	0	0	0	0	0	0	0	0	0	0	0	0	4	2	50	3	4	1	1	1	0	0	4.7391	37.5444	1	24	1	7	2	32	40	24	15	2000	68	84	73	85	157	113	46	88	62	60	117	79	8
9364	0	0	0	0	0	0	0	0	0	0	0	0	0	0	3	2	52	3	4	1	1	3	0	0	1.1358	5.9896	0	12	2	7	2	57	35	25	12	1860	89	103	96	92	116	103	35	67	60	50	78	69	14
9368	0	0	0	0	0	0	0	0	0	0	0	0	0	0	4	1	23	2	4	1	1	3	1	1	7.1755	6.3049	1	8	1	13	3	84	38	42	15	2658	120	146	132	73	138	98	12	75	42	20	90	60	5
9382	0	0	0	0	0	0	0	0	0	0	0	0	0	0	4	2	28	4	4	1	1	2	0	0	10.0519	30.9764	0	-7	1	4	3	18	24	32	15	838	73	106	85	91	123	103	49	68	54	62	79	68	7
9385	0	0	0	0	0	0	0	0	0	0	0	0	0	0	4	2	48	3	4	2	1	3	0	0	3.0447	4.7243	0	6	1	6	2	33	31	30	15	1986	66	99	83	87	129	112	40	69	57	51	82	69	11
9391	0	0	0	0	0	0	0	0	0	0	0	0	0	0	2	2	72	3	#NULL!	1	1	3	0	0	0.8782	1.875	1	14	1	6	2	48	34	25	14	#NULL!	59	77	64	94	113	103	50	75	59	59	85	69	13
9400	0	0	0	0	0	0	0	1	0	0	0	0	0	0	2	1	46	4	4	1	1	1	0	0	16.8263	22.4451	0	8	1	5	3	35	26	38	15	1834	72	109	95	104	204	145	54	99	75	41	130	95	12
9412	0	0	0	0	0	0	0	1	0	0	0	0	0	0	4	2	65	4	4	1	1	3	1	0	1.5567	10.1833	1	18	1	3	3	45	35	35	14	1010	50	86	71	96	143	112	41	88	57	61	92	74	19
9427	0	0	0	0	0	0	0	0	0	0	0	0	0	0	4	2	75	3	2	1	1	1	0	0	1.7413	7.6479	0	0	2	2	2	25	31	39	11	1140	75	103	84	96	147	123	58	87	72	72	102	89	14
9437	0	0	0	0	0	0	0	0	0	0	0	0	0	0	4	2	28	4	2	1	1	2	0	0	1.5614	4.609	0	-7	1	2	4	16	9	35	14	1350	62	105	82	106	143	128	42	75	63	64	94	83	8
9441	0	0	0	0	0	0	0	0	0	0	0	0	0	0	4	1	78	3	#NULL!	1	1	3	0	0	24.8294	24.8132	0	12	1	4	3	50	45	36	15	1500	55	122	83	56	178	118	37	122	69	46	125	86	12
9443	1	0	0	0	0	0	0	1	0	0	0	1	0	0	4	1	79	3	#NULL!	2	1	1	0	0	4.9934	17.7667	1	40	1	5	4	70	57	57	6	935	62	98	77	102	174	133	44	76	56	10	107	79	13
9459	0	0	0	0	0	0	0	1	0	0	0	0	0	0	4	1	70	3	4	1	1	3	0	0	7.7788	12.5049	1	3	1	3	4	47	30	38	14	1235	87	113	96	113	183	142	41	92	59	69	102	87	19
9462	0	0	0	0	0	0	0	1	0	0	0	0	0	0	4	1	62	4	2	1	1	3	0	0	1.9148	3.5701	1	15	1	3	3	53	33	32	13	895	71	96	85	110	170	150	44	73	59	60	93	83	10
9481	0	0	0	0	0	0	0	0	0	0	0	0	0	0	4	2	72	3	4	2	1	2	0	0	6.9146	10.7076	1	6	2	3	3	53	43	37	7	2065	64	92	81	96	155	123	48	87	67	70	262	91	14
9484	0	1	0	0	0	0	0	0	0	0	0	0	0	0	1	1	52	2	2	2	1	3	0	0	2.8427	4.9333	0	13	1	8	4	80	48	37	15	266	90	131	105	71	141	105	47	82	63	53	94	73	13
9490	1	0	0	0	0	0	0	0	0	0	0	0	0	0	4	2	58	4	2	1	1	1	1	0	7.4299	7.4458	1	12	1	6	3	31	31	32	15	2100	54	91	67	97	179	126	39	80	54	59	105	73	14
9493	0	0	0	0	0	0	0	0	0	0	0	0	0	0	4	1	58	4	2	1	1	3	1	1	2.902	2.6438	1	12	1	2	3	34	26	38	15	1300	106	129	118	103	140	118	56	109	76	70	113	86	12
9504	0	1	0	0	0	0	0	1	0	0	0	0	0	0	4	1	75	3	2	1	1	3	0	0	1.9252	7.8639	0	7	1	8	4	59	40	31	15	3680	94	121	105	72	143	105	30	67	51	47	90	70	14
9518	0	0	0	0	0	0	0	0	0	0	0	0	0	0	2	1	39	3	4	1	1	1	0	0	7.9689	9.8757	0	6	1	5	4	32	24	36	15	1300	100	122	110	87	115	104	30	61	46	49	79	65	14
9539	0	0	0	0	0	0	0	0	0	0	0	0	0	0	4	1	43	3	4	2	1	3	0	0	4.7331	10.6021	0	4	1	4	3	33	27	39	14	1760	87	108	99	98	138	119	53	107	64	72	255	136	17
9552	0	1	0	0	0	0	0	0	0	0	0	0	0	0	4	2	77	3	2	1	1	2	0	0	6.0175	5.9007	1	0	1	5	3	48	50	38	15	2720	58	80	66	92	148	110	37	61	46	57	93	69	14
9558	0	1	0	0	0	0	0	0	0	0	0	0	0	0	4	1	58	4	2	1	1	3	0	0	0.7815	12.6056	1	20	1	3	4	46	47	27	15	2230	81	104	94	123	144	132	58	82	68	82	102	89	21
9562	0	0	0	0	0	0	0	0	0	0	0	0	0	0	5	2	24	4	4	1	1	3	0	0	1.7541	7.966	0	11	1	8	2	55	19	20	14	1440	98	113	105	151	193	172	68	108	96	98	133	119	14
9571	0	1	0	0	0	0	0	0	0	0	0	0	0	0	4	1	55	4	2	1	1	2	0	0	12.1005	66.0271	0	0	1	4	4	35	31	37	15	1104	64	107	89	89	164	119	50	85	61	63	115	80	18
9580	0	0	0	0	0	0	0	0	0	0	0	0	0	0	3	2	71	3	1	1	1	3	0	0	7.6683	18.7542	1	19	1	7	3	66	48	41	15	945	79	119	101	91	150	113	47	85	58	57	79	70	12
9590	1	0	0	0	0	0	0	0	0	0	0	0	0	0	4	1	79	3	2	1	1	2	0	0	18.7437	18.7451	1	10	2	6	4	50	46	42	11	1436	71	117	84	96	172	142	46	99	77	63	120	98	12
9594	0	0	0	0	0	0	0	0	0	0	0	0	0	1	5	2	58	2	#NULL!	1	1	3	1	0	4.0036	18.9118	1	3	1	10	3	60	38	31	14	353	67	83	75	89	118	105	48	64	56	62	122	77	16
9607	1	0	0	0	0	0	0	0	0	0	0	0	0	0	4	1	66	5	2	1	1	3	0	0	1.4008	4.5688	1	7	1	4	3	50	34	29	11	1130	63	83	73	117	184	156	37	91	56	68	122	90	6
9635	0	0	0	0	0	0	0	0	0	0	0	0	0	0	4	2	78	3	#NULL!	2	1	1	0	0	2.7692	26.834	1	0	1	3	0	41	32	23	14	2760	64	79	70	124	165	147	41	82	61	73	105	89	11
9639	0	0	0	0	0	0	0	0	0	0	0	0	0	0	2	2	41	1	4	1	1	2	0	0	9.685	13.8194	0	3	1	3	4	40	31	31	15	2602	93	124	106	93	174	118	38	94	55	57	120	75	12
9648	0	0	0	0	0	0	0	0	0	0	0	0	0	0	4	2	45	2	1	1	1	3	1	0	41.2174	42.7917	1	19	2	11	3	56	46	38	8	2890	74	97	83	91	125	103	40	67	51	58	84	68	18
9676	1	0	0	0	0	0	0	0	0	0	0	0	0	0	4	2	68	3	2	2	1	3	0	0	2.3723	9.4514	0	5	1	2	2	30	23	25	15	1235	70	108	92	95	127	113	43	83	71	56	92	81	11
9686	1	0	0	0	0	0	0	0	0	0	0	0	0	0	2	2	70	3	4	3	1	3	0	0	1.3712	1.3715	1	26	1	7	3	74	61	55	6	490	53	94	72	97	191	146	33	108	73	49	119	93	7
9692	0	0	0	0	0	0	0	1	0	0	0	0	0	0	5	1	49	2	2	1	1	1	0	0	15.6374	17.4618	0	13	1	4	2	29	17	36	15	960	74	88	80	102	190	135	47	97	65	66	128	89	14
9710	0	0	0	0	0	0	0	0	0	0	0	0	0	0	4	1	62	2	4	2	1	3	0	0	0.7308	10.259	0	18	1	2	1	19	25	24	13	1975	76	89	83	102	161	133	46	87	61	61	157	88	15
9712	0	0	0	0	0	0	0	0	0	0	0	0	0	0	4	1	57	4	4	1	1	3	0	0	2.1401	4.7257	0	-4	1	2	2	31	34	32	14	737	84	102	92	94	130	112	56	76	67	73	91	82	15
9726	0	0	0	0	0	0	0	0	0	0	0	0	0	0	5	2	46	4	2	1	1	3	0	0	4.0615	5.375	1	7	1	5	4	81	39	38	15	10515	90	123	104	98	135	116	51	71	61	39	91	78	20
9754	0	0	0	0	0	0	0	1	0	0	0	0	0	0	2	2	63	4	2	1	1	3	0	0	3.4098	35.9243	1	28	1	2	4	28	33	32	15	2360	77	136	105	104	211	157	23	138	66	66	157	96	19
9763	0	0	0	0	0	0	0	0	0	0	0	0	0	0	4	2	69	3	2	1	1	1	0	0	1.7636	21.7535	1	20	2	8	4	84	79	36	4	732	66	104	85	76	138	110	41	128	60	58	134	79	7
9776	0	0	0	0	0	0	0	0	0	0	0	0	0	0	4	2	50	5	#NULL!	1	1	2	1	1	4.0189	3.8257	1	5	1	3	4	49	34	34	15	3170	80	148	108	93	150	112	54	85	66	70	106	83	14
9782	0	1	0	0	0	0	0	0	0	0	0	0	0	0	4	1	79	3	#NULL!	1	1	3	0	0	1.9623	6.9576	0	0	2	6	2	30	34	30	13	4595	52	74	63	87	140	116	31	68	48	50	90	70	11
9787	0	0	0	0	0	0	0	0	0	0	0	0	0	0	4	2	61	4	2	1	1	3	0	0	2.0058	13.825	1	12	1	3	2	51	47	37	15	2197	101	115	107	75	155	114	33	75	60	47	96	77	19
9790	0	0	0	0	0	0	0	1	0	0	0	0	0	0	4	1	43	4	4	1	1	3	0	0	10.9921	23.0715	0	25	2	11	3	73	65	41	8	1066	99	138	119	82	123	99	50	83	66	63	98	78	15
9795	0	1	0	0	0	0	0	1	0	0	0	0	0	0	2	2	78	3	2	1	1	2	0	0	3.7202	22.4479	1	12	2	8	4	75	54	35	12	692	83	131	104	58	142	104	33	98	51	42	121	69	18
9804	0	0	0	0	0	0	0	0	0	0	0	0	0	0	2	1	46	2	4	1	1	2	0	0	2.6097	3.4243	1	16	1	4	3	37	30	28	15	2450	71	96	81	97	143	118	45	80	64	62	100	82	7
9808	0	1	0	0	0	0	0	0	0	0	0	0	0	0	4	1	58	1	2	1	1	1	1	1	41.6336	41.8208	1	19	2	7	4	91	53	50	13	637	95	152	108	83	130	104	34	66	50	1	86	66	10
9810	0	1	0	0	0	0	0	0	0	0	0	0	0	0	4	2	62	4	4	2	1	3	0	0	1.9797	8.0097	0	12	1	6	4	37	44	31	15	3610	55	102	76	83	150	123	50	88	71	74	96	88	13
9812	0	1	0	0	0	0	0	0	0	0	0	0	0	0	4	1	47	4	4	1	1	3	1	0	5.4756	8.3201	1	19	2	9	3	70	46	25	13	1598	84	101	93	76	92	85	39	57	49	51	69	61	11
9818	0	0	0	0	0	0	0	0	0	0	0	0	0	0	4	2	55	2	4	1	1	3	0	0	2.7584	29.7507	1	11	1	10	3	48	33	26	15	3490	83	123	98	100	118	110	36	76	46	60	85	67	14
9826	1	1	0	0	0	0	0	0	0	0	0	0	0	0	4	1	67	3	2	1	1	1	1	1	6.0945	8.3757	1	40	1	10	4	59	48	34	15	1325	65	125	89	68	146	95	36	73	52	45	106	68	18
9828	0	0	0	0	0	0	0	1	0	0	0	0	0	0	2	1	46	2	4	1	1	3	0	0	5.0976	10.825	1	10	2	8	3	49	44	39	8	2465	79	114	96	94	146	123	49	97	71	64	110	89	10
9842	0	0	0	0	0	0	0	0	0	0	0	0	0	0	4	1	74	3	2	1	1	3	0	0	1.784	3.634	0	0	1	3	1	35	31	25	13	3395	61	71	68	102	155	141	38	80	52	59	102	81	13
9844	0	0	0	0	0	0	0	0	0	0	0	0	0	0	4	1	80	5	#NULL!	1	1	3	0	0	2.4791	10.5722	0	5	2	5	1	55	48	33	11	685	57	89	74	85	128	97	40	63	52	51	70	62	15
9859	0	0	0	0	0	0	0	0	0	0	0	0	0	0	4	2	51	4	2	1	1	3	0	0	1.0192	4.9153	1	12	1	2	3	41	42	25	15	970	69	90	75	99	123	110	62	89	73	70	89	81	12
9869	0	0	0	0	0	0	0	0	0	0	0	0	0	0	4	2	51	4	2	1	1	1	0	0	11.2277	42.1069	1	16	1	2	3	48	39	22	15	915	65	104	86	82	129	102	39	90	54	56	106	71	8
9870	0	0	0	0	0	0	0	0	0	0	0	0	0	0	4	2	39	3	4	1	1	1	0	0	1.5674	22.6236	1	8	2	3	3	40	19	25	11	1739	62	105	86	74	151	121	35	89	65	53	103	83	12
9889	0	0	0	0	0	0	0	1	0	0	0	0	0	0	2	1	72	3	#NULL!	2	1	1	0	0	2.578	5.3646	1	17	1	4	4	57	51	42	15	35	55	97	68	125	203	164	46	113	67	80	142	98	11
9897	0	0	0	0	0	0	0	0	0	0	0	0	0	0	4	1	78	3	#NULL!	1	1	3	0	0	2.5641	20.375	1	0	1	5	3	65	43	25	15	337	63	79	71	78	143	106	23	66	46	41	130	71	7
9900	1	0	0	0	0	0	0	1	0	0	0	0	0	0	5	1	74	3	#NULL!	2	1	3	0	0	3.8425	13.9396	1	22	1	5	3	63	58	42	15	421	87	109	96	97	139	118	26	68	46	55	89	69	10
9902	1	0	0	0	0	0	0	1	0	0	0	0	0	0	2	1	58	3	4	2	1	3	0	0	0.9712	6.0701	1	20	1	6	3	43	24	28	14	1000	65	82	71	123	152	141	44	84	66	72	99	91	14
9905	1	0	0	0	0	0	0	1	0	0	0	0	0	1	4	2	65	1	2	1	1	3	1	1	3.5227	18.9521	1	31	2	14	4	136	87	46	9	1285	117	150	131	56	153	86	14	89	51	38	106	64	16
9906	0	0	0	0	0	0	0	1	0	0	0	0	0	0	4	2	67	3	#NULL!	2	1	3	0	0	1.3812	14.0729	1	24	1	2	3	41	41	26	14	2660	88	115	95	92	136	117	36	66	51	59	88	73	6
9908	1	1	0	0	0	0	0	0	0	0	0	0	0	0	4	2	68	3	#NULL!	1	1	3	1	0	1.4878	1.7799	1	2	1	8	2	59	43	43	15	1520	114	150	143	82	157	105	49	82	63	57	99	73	15
9909	0	0	0	0	0	0	1	1	0	0	0	0	0	0	3	2	63	2	1	1	1	3	0	0	24.1225	36.8528	1	12	1	5	4	66	48	37	15	849	92	110	101	90	133	105	49	81	64	63	97	77	12
9921	0	0	0	0	0	0	0	0	0	0	0	0	0	0	4	1	20	4	4	1	1	2	0	0	1.8503	4.1104	0	0	1	2	2	33	15	22	14	2690	81	122	96	85	119	97	37	67	52	57	86	70	8
9924	0	0	0	0	0	0	0	0	0	0	0	0	0	0	4	1	71	4	2	1	1	3	1	1	3.8802	4.0382	1	15	1	5	3	75	51	37	14	2810	76	157	110	72	133	95	10	86	42	39	100	60	14
9933	1	0	0	0	0	0	0	1	0	0	0	0	0	0	4	2	70	3	2	2	1	3	0	0	6.5332	9.4576	1	12	1	4	1	5	21	17	#NULL!	#NULL!	#NULL!	#NULL!	#NULL!	#NULL!	#NULL!	#NULL!	#NULL!	#NULL!	#NULL!	#NULL!	#NULL!	#NULL!	#NULL!
9957	1	0	0	0	0	0	0	0	0	0	0	1	0	0	1	2	78	3	2	1	1	1	0	0	15.7139	16.9674	1	10	1	3	2	33	30	33	15	1727	55	77	67	110	181	145	39	73	54	56	114	84	10
9960	1	1	0	0	0	0	0	0	0	0	0	0	0	0	4	2	75	3	4	1	1	3	0	0	2.9933	2.95	1	15	2	8	2	103	66	46	3	1160	96	136	116	92	145	111	45	102	72	66	111	85	17
9966	1	0	0	0	0	0	0	0	0	0	0	0	0	0	4	2	66	3	2	2	1	3	0	0	11.0939	15.8514	0	25	1	5	2	29	34	33	15	1590	60	85	62	80	196	120	47	165	63	55	173	76	14
9969	0	0	0	0	0	0	0	0	0	0	0	0	0	0	4	2	66	4	2	2	1	3	0	0	1.3408	6.2424	1	13	1	2	0	27	25	21	15	1345	52	78	63	99	149	122	50	75	61	62	90	76	9
9973	0	0	0	0	0	0	0	1	0	0	0	0	0	0	4	2	58	4	2	4	1	3	0	0	6.9803	9.6715	1	25	1	5	3	55	41	36	15	745	65	85	72	78	176	120	44	99	66	55	116	79	16
9984	0	0	0	0	0	0	0	0	0	0	0	0	0	0	5	1	80	3	4	1	1	2	0	0	4.1673	18.8694	1	3	1	5	4	44	37	45	15	2175	52	106	74	83	248	165	20	147	71	6	236	106	10
10000	0	0	0	0	0	0	0	0	0	0	0	0	0	0	3	2	50	5	#NULL!	1	1	1	0	0	1.3263	20.7938	0	24	1	11	2	65	44	25	15	25	54	63	58	97	123	105	46	72	57	63	89	73	8
10003	0	0	0	0	0	0	0	0	0	0	0	0	0	0	2	2	41	4	2	1	1	1	0	0	1.4951	10.6993	0	0	1	2	3	22	24	30	15	2648	81	112	97	109	152	131	69	93	80	85	113	98	9
10004	0	0	0	0	0	0	0	0	0	0	0	0	0	0	4	2	52	3	2	1	1	2	0	0	10.4665	17.1271	0	6	1	4	4	51	32	31	15	2940	73	113	92	86	165	134	30	69	52	47	100	74	13
10014	0	0	0	0	0	0	0	0	0	0	0	0	0	0	4	2	21	1	4	1	1	2	0	0	0.9385	1.8729	0	0	1	2	3	18	18	29	14	2699	86	120	95	95	150	114	37	81	58	63	104	77	12
10015	0	1	0	0	0	0	0	0	0	0	0	0	0	0	2	2	62	3	4	1	1	3	0	0	1.8449	13.7986	0	5	1	3	4	67	37	29	15	1870	92	114	103	85	112	104	32	87	52	50	93	69	13
10019	0	1	0	0	0	0	0	0	0	0	0	0	0	0	4	2	49	3	1	1	1	3	1	1	1.2938	0.6368	1	14	1	19	4	123	73	47	15	75	66	92	84	61	102	84	28	75	63	45	87	72	21
10021	0	0	0	0	0	0	0	0	0	0	0	0	0	0	4	2	42	4	2	1	1	2	0	0	1.1933	7.9563	0	0	1	4	1	32	22	22	9	1857	57	86	71	105	147	118	38	83	65	65	97	83	10
10029	1	1	0	0	0	0	0	1	0	0	0	0	0	0	4	2	78	3	1	1	1	1	0	0	2.2624	10.1465	1	20	2	13	3	80	54	47	13	165	82	128	103	72	125	101	19	65	42	45	82	62	16
10041	0	0	0	0	0	0	0	0	0	0	0	0	0	0	4	2	27	4	4	1	1	2	0	0	23.3916	23.3431	0	0	1	7	3	46	26	30	15	2125	48	100	65	96	182	119	29	73	49	51	109	72	13
10043	0	0	0	0	0	0	0	1	0	0	0	0	0	0	4	2	76	3	#NULL!	1	1	3	0	0	2.0141	12.7479	1	13	1	4	3	34	37	40	14	1955	88	117	100	85	124	109	49	80	63	61	95	78	8
10045	1	1	0	0	0	0	0	1	0	0	0	0	0	0	4	1	69	3	2	1	1	3	1	1	6.3034	7.0514	1	22	1	12	3	95	67	48	15	44	46	74	55	46	154	101	23	65	48	37	118	65	2
10057	0	1	0	0	0	0	1	0	0	0	0	0	0	0	4	1	55	4	4	1	1	3	0	0	26.9339	32.8604	0	12	1	8	4	82	40	44	15	2070	109	143	124	78	137	104	38	57	47	50	72	61	21
10059	0	0	0	0	0	0	0	0	0	0	0	0	0	0	4	2	70	3	2	1	1	3	0	0	1.7806	5.5785	1	12	1	4	2	44	31	26	15	1190	70	90	77	109	164	137	43	76	63	70	103	88	9
10063	0	0	0	0	0	0	0	0	0	0	0	0	0	0	2	1	60	2	4	1	1	3	0	0	2.8064	9.5646	0	8	1	2	4	33	26	21	15	3590	97	117	107	97	140	117	51	74	62	67	96	80	19
10076	0	1	0	0	0	0	0	0	0	0	0	0	0	0	1	2	69	3	2	1	1	3	1	1	7.1173	8.6139	1	23	1	8	4	59	59	42	15	895	65	122	83	63	179	111	31	91	56	1	120	71	14
10080	0	0	0	0	0	0	0	0	0	0	0	0	0	0	4	2	28	1	#NULL!	1	1	3	0	0	2.4639	3.4542	0	-9	1	3	3	23	26	35	15	1770	76	119	96	98	142	128	64	92	74	76	109	92	14
10088	0	1	0	0	0	0	0	1	0	0	0	0	0	0	4	2	77	3	#NULL!	1	1	3	0	0	3.6885	7.1569	1	11	1	2	4	62	55	41	15	2080	69	138	114	55	153	111	10	96	45	32	111	68	13
10091	0	0	0	0	0	0	0	0	0	0	0	0	0	0	4	2	64	4	1	1	1	2	0	0	13.0801	15.8771	0	-2	1	5	4	55	30	48	15	1240	93	159	126	89	210	147	55	102	74	69	147	101	14
10102	0	0	0	0	0	0	0	0	0	0	0	0	0	0	4	2	70	3	2	1	1	3	1	1	2.452	12.3347	1	8	1	7	4	50	53	29	15	895	113	126	120	89	136	112	50	69	58	64	87	76	10
10104	0	0	0	0	0	0	0	0	0	0	0	0	0	0	1	1	71	3	2	1	1	3	0	0	0.6628	6.8146	1	14	1	5	1	70	65	29	4	3460	67	89	82	89	160	119	37	79	55	54	103	76	13
10105	0	0	0	0	0	0	0	0	0	0	0	0	0	0	4	2	41	1	4	1	1	2	0	0	1.8056	3.4153	0	0	1	2	3	33	19	31	14	730	47	91	61	109	147	126	47	72	57	65	94	77	13
10106	0	0	0	0	0	0	0	0	0	0	0	0	0	0	4	2	64	4	2	1	1	3	0	0	1.9231	4.7764	1	3	1	2	1	24	18	25	14	2280	74	108	85	116	191	139	31	87	70	62	120	92	11
10112	0	0	0	0	1	0	0	0	0	0	0	0	0	0	4	1	79	3	1	1	1	3	1	1	5.6857	5.6882	1	6	1	4	4	98	56	51	4	2390	61	104	87	143	175	155	48	88	69	81	117	97	12
10117	0	0	0	0	0	0	0	0	0	0	0	0	0	0	5	1	67	4	4	2	1	2	1	0	2.6745	9.2118	1	19	1	11	3	96	57	51	15	50	106	135	117	90	153	117	50	97	65	35	113	80	21
10126	0	0	0	0	0	0	0	1	0	0	0	0	0	0	4	1	44	4	4	1	1	1	1	1	35.4065	35.2486	1	28	1	11	2	44	41	22	15	2835	78	92	83	102	166	141	50	76	67	66	108	93	12
10138	0	0	0	0	0	0	0	0	0	0	0	0	0	0	5	1	52	3	1	1	1	3	0	0	11.9928	20.0076	1	10	2	6	4	91	53	57	7	1235	93	134	114	99	197	149	41	138	76	73	156	102	18
10153	0	0	0	0	0	0	0	0	0	0	0	0	0	0	3	2	29	1	#NULL!	1	1	3	0	0	3.4527	5.7604	0	11	2	5	3	55	22	33	12	3160	70	160	107	100	175	137	33	143	79	55	153	99	16
10186	0	0	0	0	0	0	0	0	0	0	0	0	0	1	4	2	39	4	2	1	1	3	0	0	16.7627	24.6611	0	14	2	14	4	108	65	45	3	2455	113	124	118	97	128	110	64	91	76	76	104	88	28
10198	0	0	0	0	0	0	0	0	0	0	0	0	0	0	4	1	69	3	4	1	1	1	0	0	1.6233	5.6924	0	0	1	2	4	21	22	24	15	1360	66	98	76	109	144	123	38	78	51	62	97	75	18
10207	0	1	0	0	0	0	0	0	0	0	0	0	0	0	4	2	78	3	2	2	1	3	0	0	6.9655	12.7264	1	0	1	6	4	58	38	34	10	1555	62	97	78	108	152	125	45	70	57	68	97	79	24
10220	0	0	0	0	0	0	0	0	0	0	0	0	0	0	4	2	67	3	2	1	1	1	0	0	14.0365	19.3674	1	15	1	7	2	39	37	25	15	5600	74	96	85	139	193	163	41	84	63	79	128	98	10
10224	1	0	0	0	0	0	0	0	0	0	0	0	0	0	4	1	60	2	#NULL!	2	1	3	0	0	1.556	7.209	0	5	1	2	3	45	23	30	14	2900	86	113	93	99	141	122	29	63	45	51	80	63	13
10236	0	0	0	0	0	0	0	0	0	0	0	0	0	0	2	1	76	3	#NULL!	1	1	2	0	0	1.1605	7.5917	1	4	1	3	2	38	30	27	14	1010	75	93	82	106	158	124	36	69	48	59	99	73	11
10237	1	0	0	0	0	0	0	0	0	0	0	0	0	0	4	2	78	3	2	1	1	2	0	0	3.2843	11.7813	1	5	1	5	4	57	37	29	15	1694	76	124	97	101	186	125	20	75	48	52	102	69	19
10244	0	0	0	0	0	0	0	1	0	0	0	0	0	0	5	2	71	3	2	1	1	3	0	0	13.9512	33.8528	1	20	2	4	3	47	55	41	13	915	84	129	109	94	150	118	36	71	52	60	91	74	21
10246	0	0	0	0	0	0	0	1	0	0	0	0	0	0	4	1	45	4	2	2	1	3	0	0	8.466	9.9201	0	3	1	8	3	52	41	30	15	2075	79	105	92	77	145	111	35	68	55	57	87	74	9
10247	0	0	0	0	0	0	0	0	0	0	0	0	0	0	4	2	65	3	1	2	1	3	0	0	1.6987	4.8563	1	3	1	6	2	40	36	33	15	1870	79	111	95	80	172	119	40	69	51	53	102	70	10
10248	0	0	0	0	0	0	0	0	0	0	0	0	0	0	2	2	70	3	1	2	1	3	0	0	5.9087	11.134	1	22	2	5	3	65	51	44	9	1195	93	142	108	86	195	128	68	97	80	73	112	91	13
10262	0	0	0	0	0	0	0	0	0	0	0	0	0	1	2	1	49	4	2	1	1	3	1	0	0.7958	3.259	1	31	1	5	2	45	39	26	12	1040	95	103	98	90	121	104	50	92	61	67	102	75	14
10280	0	1	0	0	0	0	1	0	0	0	0	0	0	0	5	2	57	4	4	1	1	3	0	0	13.1334	28.6354	1	12	1	5	2	42	35	31	15	3150	54	88	68	82	137	98	38	74	54	53	89	68	14
10281	0	0	0	0	0	0	0	0	0	0	0	0	0	0	5	2	63	4	2	1	1	3	0	0	2.9915	9.8701	0	6	1	5	4	63	30	38	15	3780	71	129	94	74	134	104	31	76	57	50	95	73	19
10305	0	0	0	0	0	0	0	1	0	0	0	0	0	0	4	1	64	3	2	1	1	3	0	0	0.8231	9.7708	1	10	2	8	3	53	30	30	12	1290	68	89	73	90	110	99	40	85	51	57	93	67	13
10311	0	1	0	0	0	0	0	0	0	0	0	0	0	0	4	1	70	4	#NULL!	1	1	1	1	1	1.6328	1.5014	1	28	2	7	4	71	57	46	13	799	77	113	97	76	151	109	27	63	47	48	95	67	12
10324	0	0	0	0	0	0	0	0	0	0	0	0	0	0	4	2	19	4	4	1	1	3	0	0	2.6091	6.3389	0	16	1	6	2	57	27	16	15	750	68	88	80	128	144	133	59	77	67	82	98	89	14
10328	0	0	0	0	0	0	0	0	0	0	0	0	0	0	4	1	31	4	2	1	1	1	0	0	8.0199	10.0972	0	3	1	2	4	17	24	37	12	2115	82	135	106	108	146	122	54	86	74	72	109	91	9
10331	0	0	0	0	0	0	0	0	0	0	0	0	0	0	4	1	80	3	4	1	1	3	0	0	4.8644	5.8174	0	3	1	2	4	40	37	46	15	2084	66	123	94	77	143	98	36	96	52	50	109	68	16
10344	0	0	0	0	0	0	0	0	0	0	0	0	0	0	4	2	45	5	2	1	1	3	0	0	0.9747	3.8424	0	14	1	7	2	55	46	22	15	1880	50	78	61	84	115	96	50	73	63	58	80	70	10
10356	0	1	0	0	0	0	0	0	0	0	0	0	0	1	2	2	62	4	2	1	1	3	1	1	1.0119	0.8757	1	25	1	18	4	116	74	53	15	127	93	130	116	68	126	96	47	74	60	54	139	75	19
10370	0	1	0	0	0	0	0	1	0	0	0	0	0	0	2	1	45	1	4	1	1	1	0	0	5.6417	17.7604	1	18	2	9	3	83	78	57	7	1365	79	149	107	35	128	98	43	88	63	33	285	81	3
10375	1	0	0	0	0	0	0	0	0	0	0	0	0	0	4	1	75	3	2	1	1	1	0	0	31.8457	31.6472	1	8	2	9	4	94	63	49	9	1053	105	191	124	82	208	101	39	77	50	54	121	67	15
10377	0	1	0	0	0	0	0	1	0	0	0	0	0	0	4	1	54	3	4	2	1	3	0	0	10.4554	14.1194	1	18	1	4	2	42	30	26	15	1575	79	112	105	75	122	94	37	70	45	52	87	61	16
10388	0	0	0	0	0	0	0	0	0	0	0	0	0	0	2	1	68	3	#NULL!	1	1	3	0	0	0.9205	6.6111	1	11	2	8	4	48	34	34	9	1240	83	123	101	97	132	116	49	67	58	67	84	77	12
10392	0	0	0	0	0	0	0	0	0	0	0	0	0	0	4	2	32	4	4	1	1	2	0	0	4.19	37.3931	0	-2	1	4	3	40	30	31	15	2830	103	122	110	95	149	127	30	78	67	52	99	84	15
10394	0	0	0	0	0	0	0	0	0	0	0	0	0	0	4	2	55	4	2	2	1	3	0	0	20.8833	20.8618	1	14	1	4	3	60	44	54	15	587	114	146	135	93	157	122	60	138	78	70	143	92	4
10397	0	0	0	0	0	0	0	0	0	0	0	0	0	0	4	1	70	3	2	1	1	3	0	0	1.7495	12.9854	1	24	2	5	3	83	67	39	3	700	68	98	83	88	169	130	31	87	63	58	114	85	17
10400	1	0	0	0	0	0	0	0	0	0	0	0	0	0	4	2	72	3	#NULL!	1	1	1	0	0	4.2669	8.5444	0	10	1	2	2	17	31	29	14	2695	45	66	52	112	181	141	41	95	65	65	118	90	12
10408	0	0	0	0	0	0	0	0	0	0	0	0	0	0	4	2	59	4	2	1	1	3	1	0	1.0057	12.8299	1	5	1	9	3	50	38	36	14	825	96	108	101	84	131	106	43	65	56	57	87	73	19
10412	0	1	0	0	0	0	0	0	0	0	0	0	0	0	4	2	45	4	2	1	1	3	0	0	2.6966	8.5361	1	3	1	3	3	64	43	35	15	230	101	124	112	110	160	137	57	95	74	75	112	95	13
10414	0	0	0	0	0	0	0	0	0	0	0	0	0	0	4	2	61	4	4	2	1	1	0	0	1.3488	6.8368	0	11	1	6	4	40	28	23	15	1093	70	101	82	93	148	124	54	92	76	69	113	94	21
10431	0	1	0	0	0	0	0	1	0	0	0	0	0	0	5	1	77	3	1	1	1	2	1	1	13.0416	13.0868	1	18	1	7	3	67	56	35	15	217	71	85	80	80	133	115	12	38	21	38	143	55	11
10434	0	0	0	0	0	0	0	0	0	0	0	0	0	0	2	1	59	2	#NULL!	2	1	1	0	0	8.1266	70.8118	1	11	1	10	4	48	34	34	15	#NULL!	95	114	104	153	178	164	79	94	85	105	128	113	10
10439	1	0	0	0	0	0	0	0	0	0	0	1	0	0	4	1	58	3	4	1	1	1	0	0	5.4426	11.1368	1	11	2	4	4	71	37	52	6	723	61	113	80	73	174	117	32	128	55	49	142	76	11
10440	0	0	0	0	0	0	0	0	0	0	0	1	0	0	4	1	78	3	2	1	1	1	0	0	1.8259	3.691	0	0	1	4	3	36	32	35	13	1400	69	95	79	120	161	144	37	88	52	67	104	83	17
10443	0	0	0	0	0	0	0	0	0	0	0	0	0	0	4	2	76	3	2	1	1	3	0	0	4.7692	34.9514	1	15	1	5	4	39	52	27	15	2220	72	101	83	114	159	133	52	68	59	67	89	79	18
10465	0	0	0	0	0	0	0	0	0	0	0	0	0	0	4	2	43	4	4	1	1	1	1	0	16.3719	17.5542	1	5	1	9	3	49	46	40	15	0	72	96	82	98	198	128	38	94	63	57	128	80	18
10473	0	0	1	0	0	0	0	0	0	0	0	0	0	0	4	2	76	3	2	1	1	2	0	0	0.9849	6.7597	1	5	1	5	2	50	48	25	15	1975	65	93	79	63	172	118	27	87	65	39	116	83	12
10482	1	1	0	0	0	0	0	0	0	0	0	0	0	0	5	2	68	3	#NULL!	1	1	3	1	1	2.1308	2.059	1	25	1	9	3	71	47	42	15	1318	78	96	87	76	175	121	46	99	59	57	110	78	17
10483	0	0	0	0	0	0	0	0	0	0	0	0	0	0	4	2	48	4	2	1	1	2	0	0	1.2326	9.9625	0	4	1	2	1	24	20	21	14	1539	55	78	68	98	122	107	47	68	55	65	83	72	7
10484	0	0	0	0	0	0	0	0	0	0	0	0	0	0	4	1	39	2	2	1	1	3	1	0	4.6189	5.9174	1	14	1	6	2	32	31	35	15	1575	94	122	109	99	169	121	50	111	72	66	134	89	20
10485	1	0	0	0	0	0	0	1	0	0	0	0	0	0	4	1	55	4	2	1	1	1	1	1	13.962	15.1792	1	17	1	6	3	56	48	39	15	#NULL!	75	130	91	68	115	97	27	63	45	45	79	62	17
10487	1	0	0	0	0	0	0	1	0	0	0	0	0	0	4	1	70	3	#NULL!	5	1	3	1	0	1.3802	10.1597	1	20	1	7	4	76	43	37	13	710	70	108	82	101	147	126	32	85	50	52	91	67	22
10490	0	0	0	0	0	0	0	0	0	0	0	0	0	0	2	2	26	3	#NULL!	1	1	1	0	0	9.4856	28.416	0	-3	1	7	4	43	29	36	15	1539	99	132	113	86	154	109	13	73	50	44	91	70	16
10514	0	1	0	0	1	0	1	0	0	0	0	0	0	0	4	2	60	4	2	1	1	3	1	1	1.3429	1.2493	1	30	1	17	4	96	63	50	15	242	90	123	112	76	135	104	33	60	40	50	82	62	14
10523	1	0	0	0	0	0	0	1	0	0	0	0	0	0	2	1	75	3	4	1	1	3	0	0	2.3893	2.3917	1	18	1	8	2	59	45	36	7	2562	69	133	77	93	172	120	46	98	67	62	124	84	7
10531	0	0	0	0	0	0	0	0	0	0	0	0	0	0	4	2	62	4	4	1	1	1	0	0	1.731	18.9319	0	19	1	12	3	89	55	35	7	699	82	110	96	101	143	116	46	84	62	66	104	80	7
10532	0	1	0	0	0	0	0	0	0	0	0	0	0	0	4	2	74	3	#NULL!	2	1	3	0	0	1.7213	5.9049	0	8	1	3	3	27	31	20	15	1525	60	86	71	87	130	101	16	73	55	43	197	72	10
10534	1	0	0	0	0	0	0	1	0	0	0	0	0	0	4	1	78	4	2	1	1	3	0	0	19.5666	19.5667	1	17	1	12	4	105	77	52	14	65	65	138	93	63	180	120	37	89	55	50	134	79	6
10535	0	1	0	0	0	0	0	0	0	0	0	0	0	0	2	1	48	4	4	1	1	3	0	0	0.9596	8.0736	0	12	1	5	3	36	47	14	15	2050	73	98	83	90	115	101	47	66	56	61	81	71	12
10538	0	0	0	0	0	0	0	0	0	0	0	0	0	0	4	2	48	4	2	1	1	1	0	0	6.6895	9.7396	1	3	1	3	4	37	32	33	15	2020	72	91	79	92	136	112	53	83	63	71	96	80	17
10542	0	0	0	0	0	0	0	0	0	0	0	0	0	0	4	1	21	4	4	1	1	2	0	0	1.9962	13.9563	0	0	1	5	4	57	19	32	9	3365	115	145	132	122	164	137	66	127	86	83	142	103	22
10545	0	1	0	0	0	0	0	0	0	0	0	0	0	0	4	2	52	4	2	1	1	3	1	1	0.9289	0.7924	1	10	1	11	4	93	70	37	15	2758	72	129	94	44	150	84	24	120	56	30	195	79	10
10567	0	1	0	0	0	0	0	0	0	0	0	0	0	0	4	2	49	4	2	1	1	3	0	0	4.673	19.0069	0	22	1	9	3	63	45	29	14	325	74	95	81	114	133	124	76	95	85	86	99	94	18
10580	0	0	0	0	0	0	0	0	0	0	0	0	0	0	4	1	52	4	1	1	1	3	0	0	2.9784	11.1875	1	15	1	5	4	59	57	40	15	513	83	105	93	60	129	100	20	71	55	40	82	71	12
10581	0	0	0	0	0	0	0	1	0	0	0	0	0	0	4	2	77	4	#NULL!	1	1	3	0	0	1.1349	10.0257	1	10	1	3	3	37	38	33	15	2802	62	84	69	96	135	113	38	84	55	61	93	74	19
10585	0	0	0	0	0	0	0	0	0	0	0	0	0	0	4	1	80	3	#NULL!	1	1	2	0	0	7.586	7.6424	1	7	1	3	4	27	28	46	14	1048	63	99	75	130	180	151	50	95	68	77	118	96	6
10612	0	0	0	0	0	0	0	0	0	0	0	0	0	0	4	1	70	4	2	4	1	3	0	0	2.5521	4.5743	1	21	1	7	3	71	51	54	14	34	60	117	87	88	122	104	20	60	42	54	54	54	12
10618	0	0	0	0	0	0	0	1	0	0	0	0	0	0	4	2	46	4	2	1	1	1	0	0	9.9425	23.7056	0	7	2	3	3	53	39	37	12	3128	80	120	98	93	193	137	47	85	68	62	115	90	17
10623	0	0	0	0	0	0	0	0	0	0	0	0	0	0	4	1	45	4	2	1	1	2	0	0	1.9463	12.6868	0	5	1	2	2	15	24	27	15	2875	98	137	116	90	147	123	55	89	75	71	115	95	12
10624	0	1	0	0	0	0	0	0	0	0	0	0	0	0	4	2	48	4	2	1	1	3	0	0	2.134	6.2389	1	10	1	11	4	59	38	27	15	4620	80	140	109	91	121	107	43	76	59	59	91	75	12
10626	0	0	0	0	0	0	0	0	0	0	0	0	0	0	5	2	61	4	4	1	1	3	0	0	12.0768	18.016	0	3	1	4	4	42	39	42	15	865	78	118	96	83	167	113	52	86	62	64	116	80	8
10629	1	1	0	0	0	0	0	0	0	0	0	0	0	1	2	2	70	3	2	1	1	3	1	1	11.8288	11.6826	1	27	1	8	3	89	54	45	15	1184	68	112	84	84	142	113	46	84	59	60	96	79	16
10640	0	0	0	0	0	0	0	0	0	0	0	0	0	0	5	1	43	4	4	1	1	1	0	0	0.3536	0.3354	0	0	1	2	1	36	26	27	14	740	46	61	52	99	138	116	39	67	56	59	88	76	18
10642	0	1	0	0	0	0	0	0	0	0	0	0	0	0	4	1	59	2	4	1	1	3	0	0	5.5778	10.1076	1	11	1	5	2	64	31	31	6	2760	84	115	100	83	155	114	33	97	65	48	103	76	12
10644	0	1	0	0	0	0	0	1	0	0	0	0	0	0	4	2	78	3	4	1	1	1	0	0	1.7674	15.5715	0	22	1	6	3	50	38	42	12	440	71	116	94	109	195	147	32	116	68	63	130	94	14
10646	0	0	0	0	0	0	0	0	0	0	0	0	0	0	2	1	50	1	2	1	1	3	0	0	1.8724	8.0569	0	5	2	5	4	72	43	36	10	534	64	95	77	94	159	122	42	81	64	59	104	83	7
10660	0	0	0	0	0	0	0	0	0	0	0	0	0	0	4	2	39	4	#NULL!	1	1	3	0	0	7.591	9.659	0	5	2	8	3	68	36	39	10	1887	90	112	102	88	146	119	51	78	64	68	98	82	17
10661	0	0	0	0	0	0	0	0	0	0	0	0	0	0	4	2	46	4	4	1	1	2	0	0	2.9839	6.6382	0	7	1	4	2	47	41	23	8	2160	66	103	82	99	174	137	48	78	64	66	108	86	12
10664	0	1	0	0	0	0	0	0	0	0	0	0	0	0	5	2	66	1	2	1	1	3	1	0	2.4934	8.8451	1	23	1	10	3	85	53	30	15	986	68	96	81	84	116	97	37	57	45	55	74	63	10
10672	0	0	0	0	0	0	0	0	0	0	0	0	0	0	1	2	63	2	2	1	1	1	0	0	3.753	6.7674	0	5	1	4	2	45	40	35	15	2320	81	118	98	83	158	133	52	84	69	59	107	89	6
10675	0	0	0	0	0	0	0	0	0	0	0	0	0	0	1	1	51	4	2	1	1	3	0	0	4.8759	10.8118	0	24	1	9	3	65	37	20	15	1470	68	80	74	165	198	177	50	113	91	90	138	120	12
10679	0	0	0	0	0	0	0	0	0	0	0	0	0	0	4	2	50	4	2	1	1	3	0	0	14.8878	20.6722	1	22	1	11	2	92	53	31	15	327	61	74	66	85	117	100	37	62	50	55	77	65	11
10686	0	0	0	0	0	0	0	1	0	0	0	0	0	0	3	2	60	4	1	2	1	3	0	0	0.8128	2.6326	0	7	1	4	3	36	25	26	15	2850	78	191	132	99	141	126	38	116	69	65	120	82	10
10695	0	1	0	0	0	0	0	1	0	0	0	0	0	0	4	1	62	4	2	1	1	3	1	1	2.832	52.4167	1	26	2	11	4	126	79	50	3	1935	105	132	115	87	139	113	33	78	62	57	102	78	14
10704	0	0	0	0	0	0	0	0	0	0	0	0	0	0	4	2	57	4	2	2	1	2	0	0	23.3415	30.8861	0	0	1	4	4	42	39	41	15	2515	106	126	113	98	149	114	56	85	66	71	103	81	17
10721	0	0	0	0	0	0	0	0	0	0	0	0	0	0	2	2	33	3	4	4	1	1	0	0	2.9585	12.9465	0	5	1	7	3	65	37	32	15	200	67	82	76	90	250	164	28	111	80	50	142	102	10
10731	1	1	0	0	0	0	0	0	0	0	0	0	0	0	4	2	68	3	2	1	1	3	1	1	10.9229	35.3396	1	22	1	7	4	66	48	42	15	820	58	102	68	82	141	115	24	59	38	44	82	64	17
10739	0	0	0	0	0	0	0	0	0	0	0	0	0	0	4	2	68	3	2	1	1	1	1	1	17.4892	17.4458	1	8	1	6	2	50	55	43	15	506	94	129	117	84	130	102	51	79	63	62	92	76	12
10742	0	0	0	0	0	0	0	0	0	0	0	0	0	0	2	2	78	3	2	1	1	3	0	0	5.0408	11.9174	1	17	1	5	4	68	63	42	15	1371	78	121	98	114	260	158	62	125	83	83	168	105	14
10743	1	0	0	0	0	0	0	0	0	0	0	0	0	0	5	2	75	3	2	1	1	1	0	0	5.4318	7.5965	1	5	1	2	2	19	30	24	13	2258	45	68	55	123	151	139	53	69	59	79	96	86	15
10771	0	0	0	0	0	0	1	0	0	0	0	0	0	0	4	2	67	4	2	1	1	2	0	0	3.7802	7.6354	0	9	1	8	4	34	47	43	15	1567	66	103	80	58	162	99	40	89	55	46	116	69	3
10780	0	0	0	0	0	0	0	0	0	0	0	0	0	0	4	2	18	4	4	1	1	2	0	0	2.6435	5.4653	0	0	1	2	2	16	14	19	12	2130	60	97	72	110	145	130	37	86	59	70	93	82	13
10784	0	0	0	0	0	0	0	0	0	0	0	0	0	0	4	1	78	4	#NULL!	1	1	2	1	1	6.7022	6.6333	1	0	1	9	4	46	46	48	15	1388	65	97	77	66	171	107	42	85	62	51	105	76	5
10829	0	1	0	0	0	0	0	1	0	0	0	0	0	0	4	1	63	4	2	1	1	3	0	0	4.9822	22.6396	0	11	1	10	4	60	51	45	14	2051	89	134	109	74	144	99	34	72	54	49	96	70	16
10832	1	1	0	0	0	0	1	0	0	0	0	0	0	0	5	2	77	3	2	1	1	3	0	0	1.1967	5.1326	1	14	1	5	2	38	28	29	14	744	61	93	76	105	133	121	44	94	61	65	106	81	17
10845	0	0	0	0	0	0	0	0	0	0	0	0	0	0	4	1	24	4	2	1	1	3	0	0	0.7662	27.8986	0	0	1	3	3	31	16	15	15	1550	85	110	95	102	123	115	41	76	66	64	92	82	9
10852	0	0	0	0	0	0	0	1	0	0	0	0	0	0	2	1	56	4	4	1	1	3	0	0	0.1552	1.7979	0	8	1	2	0	11	16	17	#NULL!	#NULL!	#NULL!	#NULL!	#NULL!	#NULL!	#NULL!	#NULL!	#NULL!	#NULL!	#NULL!	#NULL!	#NULL!	#NULL!	#NULL!
10872	0	0	0	0	0	0	1	1	0	0	0	0	0	0	5	2	60	4	2	1	1	3	0	0	12.7689	16.4292	1	15	1	7	4	46	34	35	15	1275	79	104	89	93	135	114	58	81	69	70	99	83	12
10884	0	0	0	0	0	0	0	1	0	0	0	0	0	0	4	2	57	4	4	1	1	1	0	0	7.8154	20.9257	0	37	1	11	4	56	51	51	15	581	62	114	77	108	170	137	54	84	67	60	117	92	5
10889	0	0	0	0	0	0	0	0	0	0	0	0	0	0	4	2	43	4	#NULL!	1	1	2	0	0	1.4555	8.2882	0	0	2	4	3	31	33	35	11	4875	57	98	68	95	164	137	43	89	70	60	107	91	9
10928	1	0	0	0	0	0	0	0	0	0	0	0	0	0	5	1	71	4	2	2	1	1	0	0	7.9396	13.1569	1	5	1	6	1	72	57	38	3	2325	60	83	74	104	163	132	42	59	51	59	88	75	12
10939	0	0	0	0	0	0	0	0	0	0	0	0	0	0	4	2	51	4	2	1	1	3	0	0	15.7788	44.8236	1	9	1	7	3	51	29	30	10	2350	89	109	99	119	164	139	58	92	69	80	113	93	18
10947	0	0	0	0	0	0	0	0	0	0	0	0	0	0	3	2	75	3	2	1	1	3	0	0	1.6011	7.6799	1	19	1	10	2	66	43	33	15	175	55	70	63	83	139	108	31	71	42	50	83	64	10
10950	0	0	0	0	0	0	0	1	0	0	0	0	0	0	5	2	54	2	2	2	1	3	0	0	3.2852	10.934	1	12	2	6	4	58	43	50	11	965	99	133	114	85	162	112	48	90	62	60	114	79	18
10953	0	1	0	0	0	0	0	0	0	0	0	0	0	0	4	1	57	4	4	1	1	2	0	0	18.4679	19.8292	0	-1	2	11	4	75	55	48	12	1245	100	130	110	40	146	83	11	96	50	27	147	64	15
10954	0	0	0	0	0	0	0	1	0	0	0	0	0	0	4	1	47	3	1	1	1	3	0	0	1.9784	9.4535	1	12	1	2	4	50	22	21	15	1385	80	119	93	152	184	169	49	82	59	83	112	95	18
10955	1	0	0	0	0	0	0	0	0	0	0	0	0	0	2	1	78	2	4	1	1	1	1	1	0.471	0.3167	1	7	2	14	4	117	82	64	12	130	42	177	120	52	195	93	18	111	54	9	133	63	4
10963	0	0	0	0	0	0	0	0	0	0	0	0	0	0	4	1	54	4	#NULL!	1	1	1	0	0	2.1624	22.8	1	22	1	10	2	63	33	33	15	2400	84	130	107	115	173	142	63	87	74	25	118	96	7
10965	0	0	0	0	0	0	0	0	0	0	0	0	0	0	4	2	56	1	2	1	1	3	0	0	3.215	8.1764	0	0	1	2	3	34	18	29	14	1980	81	117	93	87	140	117	36	58	47	53	85	70	12
10972	0	0	0	0	0	0	0	0	0	0	0	0	0	0	4	1	70	3	2	2	1	3	0	0	2.3213	40.9299	1	19	1	5	3	47	35	21	15	1180	55	103	71	126	186	159	46	108	78	67	117	98	8
10987	0	0	0	0	0	0	0	1	0	0	0	0	0	0	4	2	73	3	#NULL!	1	1	3	0	0	8.2658	13.6396	1	10	1	7	3	50	45	35	15	695	81	114	94	78	132	100	35	95	59	49	107	74	11
11003	0	0	0	0	0	0	0	0	0	0	0	0	0	0	4	2	48	4	4	1	1	2	0	0	1.3047	9.1653	0	21	1	6	2	67	37	27	15	227	74	94	84	85	164	113	32	62	49	50	93	70	10
11008	0	1	0	0	0	0	0	0	0	0	0	0	0	0	4	2	57	4	4	1	1	3	0	0	2.9942	8.841	0	16	1	7	4	81	40	30	15	6450	102	113	109	92	143	115	31	64	47	57	90	70	21
11018	0	0	0	0	0	0	0	0	0	0	0	0	0	0	2	2	64	2	1	1	1	3	0	0	5.3721	9.3056	1	5	1	3	3	39	41	31	15	675	68	108	86	108	185	134	57	131	76	77	149	95	9
11019	0	0	0	0	0	0	0	0	0	0	0	0	0	0	4	2	51	4	3	1	1	1	0	0	4.9724	10.5056	0	21	2	12	4	68	49	35	10	#NULL!	63	134	87	75	181	103	33	83	49	49	115	66	8
11032	0	0	0	0	0	0	0	1	0	0	0	0	0	0	4	1	50	2	1	1	1	3	0	0	2.1827	4.8625	0	20	1	3	3	35	26	32	15	#NULL!	70	112	85	52	124	88	25	73	44	34	87	58	9
11036	0	1	0	0	0	0	0	0	0	0	0	0	0	0	4	2	61	2	4	1	1	3	0	0	1.7605	4.5993	0	0	1	4	2	35	23	22	15	2588	66	103	78	103	120	110	43	74	64	59	85	75	13
11047	0	0	0	0	0	0	0	0	0	0	0	0	0	0	2	1	65	3	#NULL!	1	1	3	0	0	2.3894	63.8868	1	5	1	5	3	73	50	29	8	2950	105	127	114	99	156	125	44	95	65	67	108	83	13
11061	0	0	0	0	0	0	0	0	0	0	0	0	0	0	4	1	47	4	2	1	1	3	0	0	1.1676	2.7007	1	11	1	5	2	54	38	23	15	300	58	103	83	109	141	129	41	71	52	64	85	77	16
11065	0	0	0	0	0	0	0	1	0	0	0	0	0	0	4	2	58	3	4	1	1	3	0	0	5.9961	29.1917	1	24	1	8	1	44	41	39	15	165	59	87	66	119	166	143	61	82	73	82	115	99	12
11081	0	1	0	0	0	0	0	0	0	0	0	0	0	0	5	1	32	4	4	1	1	3	0	0	2.798	2.791	0	0	1	3	4	38	14	27	15	2820	82	118	102	81	125	101	28	66	48	54	80	66	14
11090	0	0	0	0	0	0	0	0	0	0	0	0	0	0	2	1	29	2	4	1	1	3	0	0	4.68	7.5069	1	14	1	5	3	41	22	28	15	1740	58	96	73	103	157	129	53	83	68	74	105	90	11
11093	0	0	0	0	0	0	0	0	0	0	0	0	0	0	4	1	42	4	4	1	1	3	1	1	14.0403	13.8528	1	2	1	5	4	52	38	38	6	2440	56	95	78	106	161	135	38	89	71	64	115	94	14
11106	0	1	0	0	0	0	0	0	0	0	0	0	0	1	2	2	42	2	4	1	1	3	1	1	10.0535	9.9229	1	23	1	9	2	57	66	34	15	1194	111	122	118	99	190	140	49	114	79	68	135	97	15
11109	0	1	0	0	0	0	0	0	0	0	0	0	0	1	4	2	71	3	2	2	1	3	1	1	5.0174	4.4396	1	21	2	8	4	71	65	26	10	1650	81	100	90	81	144	111	52	96	65	62	105	76	17
11112	0	0	0	0	0	0	0	0	0	0	0	0	0	0	4	1	54	4	4	1	1	3	1	1	2.4448	37.7014	1	0	2	14	4	82	46	41	11	2365	122	156	135	90	150	117	41	69	56	59	96	76	20
11116	0	0	0	0	0	0	0	0	0	0	0	0	0	0	4	2	54	2	1	1	1	3	0	0	2.0987	18.7778	1	7	1	6	3	50	26	44	14	505	75	103	90	108	199	133	67	95	77	83	226	103	10
11133	0	0	0	0	0	0	0	0	0	0	0	0	0	0	4	1	70	4	1	1	1	2	0	0	2.8467	9.6847	0	3	2	4	3	48	42	44	9	1724	58	87	72	77	140	102	23	63	47	49	93	66	12
11135	0	0	0	0	0	0	0	0	0	0	0	0	0	0	4	2	61	4	2	1	1	3	0	0	14.985	43.775	0	11	1	12	1	87	60	32	14	136	65	77	69	91	127	107	38	64	51	56	85	70	11
11139	0	1	0	0	0	0	0	0	0	0	0	0	1	0	4	2	77	3	2	1	1	3	0	0	5.9186	11.7986	0	21	1	3	4	43	42	35	15	2640	81	91	86	112	166	134	52	73	56	71	106	82	16
11149	0	0	0	0	0	0	0	0	0	0	0	0	0	0	4	1	26	4	4	1	1	3	0	0	2.8701	2.8438	0	7	1	7	2	59	26	54	12	31	118	143	127	111	163	135	21	86	70	68	104	91	14
11162	0	0	0	0	0	0	0	1	0	0	0	0	0	0	3	1	55	3	#NULL!	2	1	3	0	0	3.2439	8.9931	0	8	2	7	4	61	42	46	13	402	48	101	70	73	144	104	33	93	51	50	110	69	9
11167	0	1	0	0	0	0	1	0	0	0	0	0	0	0	4	2	49	4	2	1	1	2	1	0	5.7262	64.2639	1	38	1	3	4	66	40	29	15	1498	99	135	115	77	154	109	46	68	58	55	88	72	15
11175	1	0	0	0	0	0	0	1	0	0	0	0	0	0	1	2	62	2	2	1	1	3	0	0	25.9012	28.1972	1	20	1	5	4	62	39	41	14	1710	47	105	60	57	154	105	32	84	61	20	104	76	14
11205	0	0	0	0	0	0	0	1	0	0	0	0	0	0	4	2	78	3	2	3	1	3	0	0	6.722	14.425	1	12	1	9	2	67	55	44	10	739	42	62	51	79	146	114	24	69	37	46	85	63	9
11207	0	0	0	0	0	0	0	1	0	0	0	0	0	0	5	1	77	3	4	1	1	1	0	0	2.903	5.9701	0	12	1	4	2	26	27	24	15	#NULL!	75	93	84	122	157	143	54	100	73	77	298	103	13
11209	0	1	0	0	0	0	0	1	0	0	0	0	0	0	1	2	79	3	2	1	1	3	1	1	0.4665	0.284	1	13	2	7	4	89	60	50	6	620	61	95	69	38	126	100	12	67	54	19	80	65	10
11220	0	0	0	0	0	0	0	0	0	0	0	0	0	0	2	1	24	1	4	1	1	3	0	0	9.0945	23.1111	0	0	1	8	3	62	23	25	15	1125	90	136	111	123	155	134	27	91	76	60	108	95	12
11228	0	1	0	0	0	0	0	0	0	0	0	0	0	0	5	2	46	3	4	1	1	1	1	1	8.8818	8.6625	1	14	1	15	3	83	59	41	15	115	71	87	80	75	152	108	29	72	49	44	99	67	15
11235	0	0	0	0	0	0	0	0	0	0	0	0	0	0	4	2	39	3	4	1	1	3	0	0	1.7184	7.0729	1	0	1	5	4	49	37	21	15	2510	79	118	88	99	125	113	48	82	66	65	96	82	20
11236	0	1	0	0	0	0	0	0	0	0	0	0	0	0	4	1	78	3	2	1	1	3	0	0	2.5665	4.5472	1	0	1	2	4	45	27	38	15	1400	76	98	86	95	122	109	40	62	49	59	78	69	18
11262	1	0	0	0	0	0	0	0	0	0	0	0	0	0	4	2	76	4	4	1	1	3	0	0	4.0542	15.766	1	10	2	11	4	92	64	48	9	499	73	170	98	73	129	98	11	72	52	43	91	67	20
11275	0	1	0	0	0	0	0	0	0	0	0	0	0	0	5	1	50	4	4	1	1	3	0	0	4.6895	9.825	0	5	1	5	4	49	34	36	15	2175	79	126	101	72	119	98	27	75	57	45	91	72	12
11280	0	0	0	0	0	0	0	1	0	0	0	0	0	0	4	2	44	3	2	2	1	3	0	0	15.9748	21.8875	1	15	1	10	4	84	44	40	15	693	70	148	91	71	188	111	39	88	56	49	117	73	22
11286	0	0	0	0	0	0	0	0	0	0	0	0	0	0	4	2	80	3	2	1	1	2	0	0	3.0459	13.841	0	5	1	2	3	21	27	23	14	2610	82	96	89	97	165	123	47	82	58	62	108	78	8
11288	0	0	0	0	0	0	0	0	0	0	0	0	0	0	4	1	77	3	2	2	1	3	1	1	11.1777	14.7007	1	20	1	2	3	29	39	19	15	3425	70	95	81	92	131	113	47	88	64	60	95	76	21
11305	0	0	0	0	0	0	0	0	0	0	0	0	0	0	4	2	51	4	2	1	1	1	0	0	1.6245	7.2972	0	18	1	3	2	34	28	24	15	1975	61	86	76	121	205	164	60	91	74	78	130	101	9
11307	0	0	0	0	0	0	0	0	0	0	0	0	0	0	4	2	59	4	2	1	1	3	1	1	1.6048	2.1326	1	17	1	7	4	80	47	33	14	1145	101	111	106	89	126	106	45	67	54	63	85	71	21
11309	0	0	0	0	0	0	0	0	0	0	0	0	0	0	4	2	39	4	4	1	1	1	0	0	16.1966	21.4132	1	5	1	3	1	30	19	33	15	1481	63	89	73	116	162	136	69	99	81	81	119	98	14
11318	1	1	0	0	0	0	0	1	0	0	0	0	0	0	4	1	71	3	1	10	1	3	0	0	3.2294	13.9451	1	15	1	5	4	41	38	38	15	1257	74	107	91	82	124	103	47	65	55	61	86	71	15
11320	0	1	0	0	0	0	0	0	0	0	0	0	0	0	4	2	58	3	1	1	1	3	0	0	12.0088	16.7069	0	27	1	11	4	83	41	48	15	1385	130	153	146	70	122	96	46	87	62	48	112	75	24
11321	0	0	0	0	0	0	0	0	0	0	0	0	0	0	4	1	74	3	#NULL!	2	1	1	0	0	7.8001	17.3632	1	10	1	3	3	28	40	25	15	2960	93	128	106	58	155	104	38	87	57	46	216	87	16
11331	0	0	0	0	0	0	0	0	0	0	0	0	0	0	4	1	26	2	4	1	1	3	0	0	1.7537	6.3972	0	-5	1	11	3	66	23	25	15	1150	69	94	83	97	122	111	39	72	56	57	81	70	10
11334	0	0	0	0	0	0	0	1	0	0	0	0	0	0	5	2	56	4	2	1	1	1	1	1	25.9041	29.2361	1	3	1	8	4	51	26	30	15	3037	78	114	92	78	150	105	35	91	54	49	111	70	18
11338	0	0	0	0	0	0	0	0	0	0	0	0	0	0	4	2	50	4	2	2	1	1	0	0	1.2935	5.3736	0	5	1	3	3	40	15	12	15	5160	63	111	76	123	198	146	44	82	59	76	121	88	10
11342	0	0	0	0	0	0	0	1	0	0	0	0	0	0	4	1	46	1	2	2	1	3	0	0	2.1307	2.9014	0	21	1	5	1	39	28	22	15	1880	67	89	79	69	108	92	33	96	50	45	95	64	13
11346	0	0	0	0	0	0	0	1	0	0	0	0	0	0	2	2	60	4	4	5	1	3	0	0	1.3611	1.5424	1	7	1	4	2	27	21	15	15	#NULL!	65	83	72	121	185	153	65	96	77	79	111	95	13
11349	0	0	0	0	0	0	0	0	0	0	0	0	0	0	4	1	53	5	4	1	1	3	1	1	3.3491	1.7132	1	#NULL!	1	5	4	52	33	30	15	1813	64	99	84	75	160	113	58	98	79	68	138	92	20
11355	0	1	0	0	0	0	0	0	0	0	0	0	0	0	4	2	54	4	2	1	1	2	0	0	22.1683	28.3542	0	0	1	12	4	51	35	33	15	889	98	140	115	78	143	108	47	77	60	60	95	75	12
11363	0	0	0	0	0	0	0	0	0	0	0	0	0	0	4	1	51	3	1	1	1	1	0	0	31.5812	37.6903	1	21	1	8	4	62	52	40	15	1418	89	123	110	66	138	94	34	81	57	30	249	73	12
11364	0	0	0	0	0	0	0	0	0	0	0	0	0	0	4	2	52	1	4	1	1	3	0	0	2.9993	5.8681	1	14	1	5	3	31	20	32	15	1878	78	112	89	115	157	135	59	86	71	84	107	92	15
11372	0	0	0	0	0	0	0	0	0	0	0	0	0	0	4	2	78	3	#NULL!	2	1	1	0	0	1.7212	4.8417	0	0	1	3	3	40	37	36	11	2210	51	85	68	117	192	148	45	89	65	74	110	93	10
11375	0	0	0	0	0	0	0	1	0	0	0	0	0	0	5	1	57	2	2	1	1	3	0	0	6.9339	10.2083	0	7	1	8	4	54	33	37	15	1370	102	155	121	73	225	103	39	105	60	49	270	78	8
11378	0	1	0	0	0	0	0	0	0	0	0	0	0	0	5	2	45	2	4	1	1	3	0	0	7.3228	8.2597	1	5	1	10	4	74	55	39	15	1945	90	110	99	68	125	102	44	74	63	53	92	75	16
11380	0	1	0	0	0	0	0	0	0	0	0	0	0	0	4	1	74	3	#NULL!	1	1	3	0	0	11.984	11.9847	1	6	1	4	4	56	46	40	15	1086	70	117	85	50	155	100	11	79	48	27	101	65	8
11388	0	0	0	0	0	0	0	0	0	0	0	0	0	0	5	2	55	4	2	1	1	3	0	0	2.8245	5.6604	1	-7	2	4	4	65	47	44	7	1600	68	104	90	70	200	143	47	120	78	55	147	98	10
11427	0	0	0	0	0	0	0	0	0	0	0	0	0	0	4	2	44	4	4	1	1	3	0	0	6.5247	10.3882	0	0	1	9	4	50	33	41	15	2070	83	152	126	72	140	99	35	76	55	47	97	70	12
11433	0	0	0	0	0	0	0	0	0	0	0	0	0	0	4	2	71	3	2	1	1	2	0	0	3.184	41.0069	1	15	1	8	4	56	45	30	15	1855	80	97	89	83	147	110	46	75	56	62	107	78	12
11446	0	1	0	0	0	0	1	1	0	0	0	0	0	0	2	1	60	3	#NULL!	4	1	3	0	0	13.441	23.2576	0	21	1	6	4	39	36	38	15	812	91	107	98	78	136	106	52	76	64	59	95	77	13
11455	0	0	0	0	0	0	0	1	0	0	0	0	0	0	4	1	71	3	4	1	1	3	1	0	1.887	25.0222	1	24	1	11	3	53	42	29	14	3070	89	107	100	73	135	103	26	89	47	43	99	65	14
11474	0	0	0	0	0	0	0	0	0	0	0	0	0	0	4	2	58	3	4	1	1	3	0	0	1.0341	5.8632	0	19	1	7	2	53	35	25	15	1800	66	98	78	90	140	102	33	61	50	44	72	62	16
11477	0	0	0	0	0	0	0	0	0	0	0	0	0	0	4	2	52	4	2	1	1	3	0	0	2.1181	6.8604	1	17	1	3	2	28	33	17	14	#NULL!	75	113	95	91	157	111	42	80	62	63	100	78	15
11483	0	0	0	0	0	0	0	0	0	0	0	0	0	0	5	1	52	4	2	1	1	3	0	0	3.9623	7.9604	0	5	1	6	3	44	31	40	15	3765	90	135	100	83	263	113	40	260	65	57	280	96	6
11486	0	0	0	0	0	0	0	1	0	0	0	0	0	0	2	2	65	3	3	3	1	2	0	0	3.2467	15.025	1	35	1	5	2	55	55	39	15	2	56	77	64	103	138	114	53	78	63	67	88	75	13
11492	0	0	0	0	0	0	0	0	0	0	0	0	0	0	4	2	66	4	2	1	1	1	0	0	1.4419	8.2438	1	15	2	7	3	79	57	38	3	1815	77	103	91	97	150	123	39	66	55	56	90	76	10
11506	1	0	0	0	0	0	0	1	0	0	0	0	0	0	4	1	71	3	#NULL!	1	1	3	1	0	5.7652	6.0528	1	20	1	7	3	53	34	28	14	1755	59	98	73	71	112	94	30	70	52	48	81	66	22
11520	0	0	0	0	0	0	0	0	0	0	0	0	0	0	5	2	52	4	#NULL!	1	1	2	0	0	18.8975	18.884	0	0	1	7	4	51	31	37	15	3410	57	126	80	89	135	106	43	76	55	50	129	74	13
11526	0	0	0	0	0	0	0	0	0	0	0	0	0	0	4	1	64	4	4	1	1	2	0	0	2.3645	55.0549	0	0	1	3	3	48	28	34	14	1017	60	95	80	71	128	99	21	77	42	41	89	62	12
11554	0	0	0	0	0	0	0	0	0	0	0	0	0	0	4	1	78	3	#NULL!	1	1	3	0	0	20.3016	23.925	1	12	1	11	4	88	66	41	15	1060	87	119	100	11	139	102	17	62	45	29	90	64	30
11558	0	0	0	0	0	0	0	0	0	0	0	0	0	0	4	2	54	4	2	1	1	1	0	0	2.7946	6.4694	0	14	1	7	3	27	30	30	14	2885	72	112	90	87	191	135	52	91	74	65	120	95	10
11559	1	0	0	0	0	0	0	0	0	0	0	0	0	0	4	2	64	4	2	2	1	3	0	0	1.9013	49.7493	1	13	1	4	4	38	39	19	15	3310	71	92	82	89	115	104	47	71	59	57	80	70	10
11563	0	0	0	0	0	0	0	0	0	0	0	0	0	0	5	2	59	4	2	1	1	1	0	0	3.3683	31.1021	0	3	1	6	3	35	30	32	15	1165	80	114	98	92	161	117	58	85	70	73	116	87	13
11567	0	0	0	0	0	0	0	1	0	0	0	0	0	0	2	2	80	3	2	1	1	3	0	0	2.631	16.7313	1	10	2	4	3	50	38	47	12	1170	73	109	91	94	175	137	45	76	56	65	162	89	11
11568	0	0	0	0	0	0	0	0	0	0	0	0	0	0	4	2	46	2	4	1	1	3	0	0	2.1804	9.9625	0	21	1	6	3	54	40	20	15	2850	67	107	85	121	152	136	47	93	62	72	112	87	11
11577	0	0	0	0	0	0	0	0	0	0	0	0	0	0	4	2	37	4	2	1	1	1	1	1	4.9527	7.5229	1	14	1	12	4	87	50	48	14	2000	33	165	143	23	212	107	8	119	52	15	140	73	16
11587	1	1	0	0	0	0	0	1	0	0	0	0	0	0	4	1	72	4	2	2	1	3	1	1	6.329	5.841	1	16	1	2	3	36	26	29	15	1595	94	108	100	85	135	110	39	80	63	51	94	74	18
11593	0	1	0	0	0	0	0	0	0	0	0	0	0	0	4	1	55	3	4	1	1	3	0	0	2.0884	5.0118	0	11	2	8	3	20	37	37	13	2080	66	96	81	80	156	115	48	119	68	61	125	86	9
11596	0	0	0	0	0	0	0	1	0	0	0	0	0	0	4	1	52	4	4	1	1	3	0	0	14.7831	35.7181	0	23	1	3	4	49	26	30	15	1960	99	125	110	108	133	119	51	77	69	70	96	86	9
11601	0	1	0	0	0	0	0	0	0	0	0	0	0	0	4	1	33	3	4	1	1	3	0	0	0.4325	5.9007	0	5	1	5	4	59	30	36	15	985	106	142	127	78	133	103	30	72	43	47	89	63	23
11614	1	1	0	0	0	0	0	0	0	0	0	0	0	0	5	2	65	4	2	1	1	3	1	0	5.155	6.7792	1	24	1	9	4	87	52	35	14	670	69	110	93	88	140	118	35	84	61	53	98	80	19
11615	0	0	0	0	0	0	0	1	0	0	0	0	0	0	5	2	62	4	4	1	1	3	0	0	12.2709	24.7007	1	24	1	8	3	54	50	42	15	2690	84	138	106	76	205	109	45	98	60	57	131	75	14
11623	0	0	0	0	0	0	0	0	0	0	0	0	0	0	4	2	42	4	2	1	1	2	0	0	2.1751	19.8201	1	5	1	3	3	35	32	29	15	2195	103	140	123	79	140	114	50	89	66	68	101	83	10
11626	0	0	0	0	0	0	0	1	0	0	0	0	0	0	5	1	66	3	#NULL!	1	1	3	1	1	8.0749	19.0903	1	18	1	5	4	74	40	45	14	506	91	122	105	96	198	134	50	104	65	67	147	93	9
11634	0	0	0	0	0	0	0	0	0	0	0	0	0	0	4	2	52	4	2	2	1	3	1	1	3.3988	4.1806	1	9	1	8	3	62	64	35	15	690	108	155	121	64	162	96	32	95	60	49	208	76	8
11658	0	0	0	0	0	0	0	1	0	0	0	0	0	0	4	2	59	4	2	1	1	3	0	0	12.26	25.2201	0	26	2	11	4	67	54	43	8	3968	80	136	105	89	231	149	55	123	86	67	214	109	16
11667	0	0	0	0	0	0	0	0	0	0	0	0	0	0	4	1	62	4	2	2	1	3	0	0	5.7318	11.6083	1	0	1	6	3	55	41	48	14	1251	83	111	99	82	126	99	18	66	39	40	86	59	12
11683	1	0	0	0	0	0	0	1	0	0	0	0	0	0	2	2	77	3	2	1	1	3	0	0	2.9196	2.9174	1	17	1	3	3	38	39	28	15	1330	85	104	96	88	117	102	53	75	64	66	86	77	12
11687	1	1	0	0	0	0	1	1	0	0	0	0	0	0	4	2	62	3	2	1	1	3	1	1	6.6968	6.6174	1	22	1	8	3	69	48	35	14	1685	82	138	110	61	125	91	28	75	59	38	83	66	9
11707	1	0	0	0	0	0	0	0	0	0	0	0	0	0	4	1	69	3	#NULL!	1	1	3	0	0	1.6092	7.4951	0	2	1	2	2	33	30	32	15	1996	73	153	116	88	158	110	51	73	60	67	104	78	8
11708	1	1	0	0	0	0	0	0	0	0	0	0	0	0	4	2	66	3	4	2	1	1	0	0	15.2436	19.0146	1	11	1	3	4	59	47	43	15	1910	97	132	112	1	139	112	37	103	54	57	113	75	18
11718	0	0	0	0	0	0	0	0	0	0	0	0	0	0	5	1	74	3	#NULL!	1	1	1	0	0	1.3	18.8826	0	0	1	2	4	43	26	19	15	2270	85	117	102	119	149	131	45	79	54	72	94	79	11
11720	0	1	0	0	0	0	0	0	0	0	0	0	0	0	4	2	34	4	4	1	1	3	1	1	23.4417	51.8403	1	11	1	10	4	78	43	29	14	4680	93	117	104	89	121	103	32	64	43	51	81	63	14
11723	0	0	0	0	0	0	0	0	0	0	0	0	0	0	5	1	32	4	2	1	1	3	0	0	2.968	14.8243	0	0	1	5	2	40	25	22	15	1150	68	83	75	98	121	108	57	88	73	66	96	81	14
11728	1	0	1	0	0	0	0	1	0	0	0	0	0	0	4	1	63	4	2	2	1	2	0	0	2.6383	24.5729	1	21	1	2	4	63	41	31	15	2125	70	167	117	67	152	109	35	102	64	35	110	71	13
11744	0	0	0	0	0	0	0	1	0	0	0	0	0	0	4	1	64	3	#NULL!	1	1	3	0	0	1.7717	5.7326	0	10	1	5	3	27	32	40	14	4360	81	97	87	88	150	120	46	88	63	60	87	70	14
11747	0	0	0	0	0	0	0	0	0	0	0	0	0	0	3	2	42	5	2	1	1	3	0	0	1.9119	16.0688	0	5	1	4	3	41	22	26	15	4775	101	136	119	91	130	109	48	77	61	65	87	77	21
11753	0	1	0	0	0	0	0	0	0	0	0	0	0	0	5	2	38	2	4	1	1	3	0	0	2.0411	5.9896	1	-4	1	3	4	40	22	20	15	3600	100	120	109	103	132	120	41	76	55	62	76	69	19
11755	0	0	0	0	0	0	0	0	0	0	0	0	0	0	4	1	43	4	2	2	1	3	0	0	1.3908	3.1896	1	14	1	5	3	55	28	43	14	1480	111	155	136	80	165	110	38	81	57	54	109	75	10
11756	0	0	0	0	0	0	0	0	0	0	0	0	0	0	2	1	70	3	#NULL!	1	1	3	0	0	0.9688	3.0472	1	10	1	5	3	36	29	31	15	11800	100	114	107	94	141	127	42	76	60	69	98	83	14
11764	1	0	0	0	0	0	0	0	0	0	0	0	0	0	4	2	79	3	2	1	1	3	0	0	13.1328	14.2083	1	8	1	6	4	44	51	45	15	879	67	107	79	75	136	107	37	60	50	50	85	67	12
11765	1	0	0	0	0	0	0	0	0	0	0	0	0	0	4	1	53	4	#NULL!	1	1	3	0	0	24.7562	64.5347	1	29	1	7	3	63	49	37	15	114	89	104	98	112	183	143	52	84	69	70	101	88	15
11766	0	0	0	0	0	0	0	1	0	0	0	0	0	0	4	2	73	3	2	1	1	3	0	0	1.2496	8.775	1	24	1	3	2	40	38	29	15	2540	56	102	71	100	181	118	34	87	51	24	116	69	14
11767	0	0	0	0	0	0	0	0	0	0	0	0	0	0	4	2	68	4	2	2	1	1	0	0	2.1742	6.3229	1	5	1	4	3	39	37	31	15	1455	68	109	80	92	142	111	42	88	52	59	95	71	10
11776	0	0	0	0	0	0	0	0	0	0	0	0	0	0	4	2	33	4	4	1	1	2	0	0	21.5381	35.2701	0	0	1	6	4	75	28	33	15	5140	87	134	111	77	148	119	43	93	71	59	105	87	14
11798	0	1	0	0	0	0	0	0	0	0	0	0	0	0	4	1	71	3	2	1	1	3	0	0	3.4713	6.6361	0	6	2	6	3	53	43	35	8	949	73	89	82	86	111	99	34	58	46	54	296	75	17
11818	0	0	0	0	0	0	0	0	0	0	0	0	0	0	4	2	41	3	4	2	1	3	0	0	1.0253	3.8597	1	-5	1	2	3	46	22	22	15	2000	81	105	91	89	145	122	30	82	69	37	92	81	9
11819	0	1	0	0	0	0	0	1	0	0	0	0	0	1	4	2	52	3	1	1	1	3	1	1	10.3835	10.3243	1	19	1	9	4	69	27	31	15	3835	70	91	80	99	146	120	45	73	57	57	90	72	15
11824	0	1	0	0	0	0	0	1	0	0	0	0	0	0	4	1	47	3	4	1	1	3	1	1	8.1286	8.9368	1	10	1	7	4	61	25	23	15	1745	85	138	101	70	121	97	38	75	54	15	92	66	15
11825	0	0	0	0	0	0	0	0	0	0	0	0	0	0	4	2	43	4	1	1	1	1	0	0	1.2299	31.1931	1	19	1	6	3	43	27	30	15	1517	80	126	97	121	171	149	60	91	74	79	117	98	8
11829	0	1	0	0	0	0	0	0	0	0	0	0	0	0	5	2	19	4	4	1	1	3	0	0	4.7033	4.6563	0	10	1	4	4	57	27	33	15	2225	66	166	90	80	134	105	32	85	56	38	99	70	13
11842	0	0	0	0	0	0	0	0	0	0	0	0	0	0	4	1	71	3	#NULL!	1	1	3	0	0	1.6168	1.9146	1	3	1	4	4	44	26	30	14	2933	88	110	94	90	196	122	28	68	46	52	111	71	18
11844	0	1	0	0	0	0	0	0	0	0	0	0	0	0	4	2	79	3	2	1	1	1	0	0	1.8258	34.9556	1	6	1	3	2	51	48	38	14	2155	58	80	69	105	156	133	57	85	69	75	134	94	15
11852	0	0	0	0	0	0	0	1	0	0	0	0	0	0	4	2	50	3	4	1	1	3	0	0	36.7438	36.7444	1	11	2	12	4	97	63	56	13	271	99	166	123	72	160	105	33	106	69	46	116	81	12
11858	0	0	0	0	0	0	0	0	0	0	0	0	0	0	3	2	30	5	4	1	1	3	1	1	3.0068	3.0076	1	9	1	17	3	113	67	45	8	92	70	95	78	85	133	117	24	65	45	44	83	69	13
11860	0	0	0	0	0	0	0	0	0	0	0	0	0	0	4	1	66	3	2	1	1	3	0	0	13.9511	79.0799	0	0	1	8	3	66	45	38	10	5635	93	116	101	137	180	154	59	125	89	89	138	111	15
11861	0	0	0	0	0	0	0	0	0	0	0	0	0	0	2	1	21	2	4	10	1	3	0	0	3.1419	3.7465	0	7	1	3	3	56	32	27	14	2540	103	135	115	79	118	99	24	61	42	42	77	61	16
11880	0	0	0	0	0	0	0	0	0	0	0	0	0	0	4	2	76	3	2	2	1	3	0	0	1.5791	4.3139	1	23	1	3	3	44	43	29	13	1800	61	76	67	80	110	99	38	60	48	60	79	66	11
11881	1	0	0	0	0	0	0	1	0	0	0	0	0	0	4	2	65	4	2	1	1	3	0	0	0.6599	3.1833	1	12	1	7	4	51	47	26	15	2650	92	134	112	109	154	134	59	84	70	72	99	85	27
11882	0	0	0	0	0	0	0	0	0	0	0	0	0	0	4	2	50	2	2	1	1	3	0	0	0.8738	1.8681	1	5	1	2	3	29	25	39	14	1090	86	123	96	96	126	114	41	85	59	59	97	77	10
11906	0	1	0	0	0	0	0	0	0	0	0	0	0	0	5	1	42	4	2	1	1	1	1	1	1.8941	1.7326	1	14	1	16	4	104	61	51	15	65	72	92	80	81	100	90	30	47	42	50	63	59	2
11907	0	0	0	0	0	0	0	0	0	0	0	0	0	0	4	2	53	4	2	1	1	3	0	0	1.8874	6.1438	0	5	1	3	3	42	24	31	14	1880	57	125	81	100	154	123	64	101	77	78	120	93	13
11952	0	0	0	0	0	0	0	0	0	0	0	0	0	0	4	1	52	4	2	1	1	1	0	0	3.3739	34.841	1	16	1	9	3	76	42	32	15	702	74	113	99	108	147	134	52	72	62	42	96	84	17
11993	0	0	0	0	0	0	0	0	0	0	0	0	0	0	4	2	69	3	2	1	1	2	0	0	6.1136	9.6924	1	7	1	6	3	46	47	41	15	511	83	105	94	88	139	108	27	49	39	46	75	59	8
12001	0	0	0	0	0	0	0	0	0	0	0	0	0	0	4	1	72	3	2	1	1	1	0	0	4.6201	13.2951	0	0	2	3	3	26	31	31	11	2031	78	114	91	86	204	130	13	109	62	53	151	92	9
12008	0	1	0	0	0	0	0	1	0	0	0	0	0	0	4	1	61	3	#NULL!	2	1	3	0	0	3.1561	9.9479	1	11	1	6	3	50	32	26	15	1590	60	80	68	73	125	98	33	83	52	43	88	62	10
12013	0	0	0	0	0	0	0	0	0	0	0	0	0	0	4	2	51	3	1	2	1	3	0	0	1.8171	5.8375	0	13	1	6	1	20	24	34	14	1225	70	85	79	92	128	114	51	76	67	67	86	77	9
12021	0	0	0	0	0	0	0	0	0	0	0	0	0	0	4	2	41	4	4	1	1	3	0	0	3.933	5.9618	0	-5	1	5	4	33	52	34	11	3020	99	119	112	88	138	111	42	74	60	60	95	77	20
12025	0	0	0	0	0	0	0	0	0	0	0	0	0	0	2	2	76	3	2	1	1	3	0	0	1.8068	5.6993	1	20	1	2	4	24	35	21	15	1495	98	122	110	111	147	130	36	84	67	61	104	88	20
12028	0	0	0	0	0	0	0	0	0	0	0	0	0	0	4	2	69	3	2	1	1	3	0	0	12.1806	16.1938	1	4	1	3	1	34	35	31	15	528	69	89	76	97	128	111	44	72	57	62	90	75	8
12037	1	0	0	0	0	0	0	1	0	0	0	0	0	0	4	1	78	3	#NULL!	1	1	1	0	0	16.576	20.5	0	14	1	2	3	22	31	29	13	2485	65	89	75	107	158	131	39	56	47	62	86	73	13
12045	0	1	0	0	0	0	0	0	0	0	0	0	0	0	4	1	62	3	#NULL!	1	1	3	0	0	2.2517	8.9139	1	12	2	8	3	60	41	30	10	1750	83	106	90	77	127	106	25	76	45	44	90	65	18
12050	1	1	0	0	0	0	0	0	0	0	0	0	0	0	4	2	64	3	1	1	1	3	1	0	1.469	10.8618	1	32	1	4	3	38	46	30	15	955	94	122	106	88	145	107	49	138	66	63	108	79	12
12054	0	0	0	0	0	0	0	0	0	0	0	0	0	0	5	2	25	4	2	1	1	3	0	0	43.2606	43.2611	1	5	1	10	3	81	45	40	15	1733	112	142	126	75	142	105	44	72	58	56	89	73	16
12068	0	0	0	0	0	0	0	0	0	0	0	0	0	0	5	1	53	4	2	1	1	1	0	0	3.1639	19.7521	1	12	1	5	3	80	63	43	3	1305	91	121	105	79	143	110	41	124	59	61	289	80	9
12070	0	1	0	0	0	0	0	0	0	0	0	0	0	0	4	2	65	3	2	1	1	3	1	0	3.056	15.6146	1	12	1	5	3	45	25	27	14	3535	65	79	73	108	217	160	35	139	62	59	159	95	16
12079	1	0	0	0	0	0	0	0	0	0	0	0	0	0	4	1	78	3	2	1	1	1	0	0	1.073	6.7951	0	5	1	4	3	71	46	39	13	2010	91	145	111	122	156	138	61	132	85	83	142	105	19
12087	0	1	0	0	0	0	0	0	0	0	0	0	0	0	3	2	45	4	4	2	1	3	0	0	2.875	4.6986	0	0	1	7	4	47	49	26	14	2560	81	116	96	69	125	102	32	74	56	41	83	66	13
12089	1	0	0	0	0	0	0	0	0	0	0	0	0	0	4	2	70	3	2	1	1	3	1	1	9.847	9.1576	1	10	1	12	4	60	61	47	15	455	70	116	83	47	161	110	16	85	56	28	297	86	12
12097	0	0	0	0	0	0	0	0	0	0	0	0	0	0	2	2	76	4	2	1	1	3	0	0	1.8847	5.8438	1	5	1	2	4	51	38	33	14	1097	64	120	77	118	205	155	43	82	63	71	123	94	13
12098	0	0	0	0	0	0	0	1	0	0	0	0	0	0	5	2	72	4	4	1	1	3	0	0	6.9858	8.1479	1	37	1	7	4	59	52	37	14	1275	70	107	92	66	126	102	36	66	53	45	84	67	18
12113	0	0	0	0	0	0	0	1	0	0	0	0	0	0	4	2	79	3	#NULL!	1	1	3	0	0	17.2178	21.8986	1	7	1	6	4	50	53	45	15	2155	78	127	107	1	145	100	35	100	61	46	109	75	14
12135	0	0	0	0	0	0	0	0	0	0	0	0	0	0	2	2	51	1	2	1	1	1	0	0	8.5775	27.6993	0	9	1	12	3	85	52	41	7	1480	62	110	94	131	179	158	60	83	70	80	116	97	9
12139	0	0	0	0	0	0	0	1	0	1	0	0	0	0	4	2	60	4	2	1	1	3	0	0	5.798	13.25	0	24	1	8	4	43	54	41	15	1345	79	132	105	78	176	109	50	97	64	63	95	78	18
12143	0	0	0	0	0	0	0	0	0	0	0	0	0	0	5	1	51	2	4	1	1	3	0	0	7.0995	14.7382	0	13	2	8	4	69	45	41	12	2305	89	121	99	91	147	114	46	79	62	62	101	79	15
12152	1	0	0	0	0	0	0	1	0	0	0	0	0	0	4	1	76	3	#NULL!	1	1	3	1	0	8.1814	12.5319	1	26	1	8	4	93	66	55	5	950	85	125	102	103	138	120	49	78	60	69	98	80	19
12161	1	0	0	0	0	0	0	0	0	0	0	0	0	0	4	2	73	3	1	1	1	1	1	1	7.7779	7.7222	1	5	1	5	4	43	42	42	15	1952	80	113	91	90	153	114	45	80	59	61	97	74	14
12166	0	0	0	0	0	0	0	1	0	0	0	0	0	0	5	2	38	2	#NULL!	1	1	3	0	0	6.1555	13.1215	1	18	1	6	4	40	27	42	15	925	76	111	89	90	137	104	37	80	47	55	217	72	12
12171	0	0	0	0	0	0	0	0	0	0	0	0	0	0	4	2	69	4	2	1	1	3	0	0	3.0534	8.6111	0	16	1	2	2	33	29	17	15	1669	53	88	72	104	173	144	57	103	82	73	122	103	12
12174	0	1	0	0	0	0	0	1	0	0	0	0	0	0	4	2	46	4	4	1	1	3	0	0	17.0307	26.1854	0	18	1	8	4	94	37	41	15	1856	88	125	107	88	166	118	40	84	58	56	111	78	17
12182	0	0	0	0	0	0	0	0	0	0	0	0	0	0	1	2	35	4	2	1	1	3	0	0	1.3009	3.9604	1	21	1	3	4	20	11	19	15	1975	88	105	95	91	103	96	50	64	58	66	76	71	16
12238	0	0	0	0	0	0	0	0	0	0	0	0	0	0	4	2	59	1	#NULL!	1	1	3	0	0	1.7447	1.7333	1	6	1	3	3	20	13	24	14	3040	82	104	92	102	130	114	45	70	58	65	88	77	12
12240	1	0	0	0	0	0	0	0	0	0	0	0	0	0	5	1	79	3	#NULL!	1	1	3	1	1	5.6555	5.2229	1	16	1	7	3	44	35	40	15	587	78	108	93	112	138	126	48	70	58	70	92	80	12
12249	0	0	0	0	0	0	1	0	0	0	0	0	0	0	4	1	78	3	#NULL!	1	1	3	0	0	3.0155	16.7333	1	6	1	3	3	31	33	22	15	1750	78	103	92	105	177	143	45	78	56	68	118	87	9
12252	0	0	0	0	0	0	0	0	0	0	0	0	0	0	4	1	69	3	4	1	1	3	0	0	2.0065	13.9257	0	5	1	2	1	43	31	22	12	2395	65	90	78	117	160	142	41	71	53	70	98	82	14
12258	0	0	0	0	0	0	0	0	0	0	0	0	0	0	4	1	30	2	4	1	1	3	0	0	2.8198	10.7715	0	5	1	2	3	51	33	31	10	3385	82	124	109	104	136	118	48	87	69	73	98	85	14
12267	1	0	0	0	0	0	0	1	0	0	0	0	0	0	5	1	75	3	#NULL!	2	1	3	0	0	3.8987	11.675	1	22	1	4	3	38	27	24	15	2365	85	102	93	106	146	130	41	71	52	65	88	78	12
12281	0	0	0	0	0	0	0	0	0	0	0	0	0	0	4	2	68	3	2	1	1	1	0	0	5.1127	37.9597	0	4	1	9	4	64	37	45	14	1150	78	126	92	75	136	107	47	69	58	57	93	74	12
12292	0	0	0	0	0	0	0	0	0	0	0	0	0	0	4	2	58	3	4	1	1	3	0	0	0.9481	2.8535	1	0	1	2	3	14	30	21	15	4058	81	105	89	128	166	146	59	84	71	85	111	96	16
12299	1	0	0	0	0	0	0	0	0	0	0	0	0	0	4	2	67	3	2	1	1	3	0	0	24.0329	24.0118	1	17	1	6	3	36	38	32	15	1940	52	74	66	109	161	128	52	79	64	64	123	85	16
12302	0	0	0	0	0	0	0	1	0	0	0	0	0	0	4	2	61	4	1	1	1	1	0	0	6.7641	55.8014	0	32	1	12	4	71	42	34	14	4190	81	100	92	85	171	134	35	111	65	54	126	88	13
12303	0	1	0	0	0	0	0	0	0	0	0	0	0	0	2	1	75	3	2	1	1	3	0	0	2.0733	6.6368	1	16	2	10	3	106	72	48	3	1266	59	104	74	92	148	118	34	92	50	57	273	83	13
12312	1	0	0	0	0	0	0	0	0	0	0	0	0	0	4	2	63	4	4	2	1	3	0	0	4.769	8.7368	1	19	1	4	3	67	43	40	15	580	69	142	99	83	139	98	44	88	55	53	95	65	13
12314	0	0	0	0	0	0	0	0	0	0	0	0	0	0	3	2	46	2	2	1	1	3	0	0	4.2222	12.375	0	20	1	3	3	42	25	16	15	3260	89	121	105	76	127	114	48	86	79	54	95	87	10
12344	0	0	0	0	0	0	0	0	0	0	0	0	0	0	4	2	74	3	2	2	1	1	0	0	6.026	24.3438	0	11	1	4	3	40	29	20	15	3175	66	90	79	113	151	132	45	73	58	65	103	83	14
12355	0	0	0	0	0	0	0	0	0	0	0	0	0	0	5	1	38	3	4	1	1	3	0	0	2.0459	16.1396	0	1	1	5	2	46	32	30	14	72	74	83	77	122	137	128	57	79	68	79	98	88	17
12367	0	1	0	0	0	0	0	0	0	0	0	0	0	0	2	1	39	2	1	2	1	3	0	0	2.998	9.3569	0	-1	1	2	4	37	18	39	14	3420	80	122	98	99	136	110	53	84	64	66	97	74	14
12380	1	0	0	0	0	0	0	0	0	0	0	0	0	0	2	2	34	2	4	1	1	3	0	0	6.7917	12.7042	1	-4	1	7	3	81	43	34	15	3935	59	159	99	76	133	107	36	77	59	51	96	75	16
12391	0	0	0	0	0	0	0	1	0	0	0	0	0	0	4	2	79	3	2	1	1	3	1	1	10.8656	10.6299	1	16	1	9	4	75	67	46	15	900	89	96	91	53	191	106	33	91	53	39	118	69	12
12401	0	0	0	0	0	0	0	0	0	0	0	0	0	0	4	1	65	4	2	1	1	3	0	0	3.6225	13.4799	1	13	1	3	3	48	33	24	13	2410	73	101	89	98	124	112	42	82	56	65	92	75	11
12411	0	0	0	0	0	0	0	1	0	0	0	0	0	0	2	1	48	3	4	5	1	1	0	0	6.0912	47.8306	0	15	1	5	3	52	30	27	15	3180	106	131	119	131	219	162	53	116	66	79	152	98	20
12412	0	0	0	0	0	0	0	0	0	0	0	0	0	0	4	2	51	4	2	1	1	3	0	0	4.7456	11.2167	1	16	1	3	1	47	27	18	15	1280	69	86	78	110	128	119	55	87	66	75	101	84	7
12425	1	0	0	0	0	0	0	0	0	0	0	0	0	0	4	1	56	4	4	1	1	3	0	0	2.1445	7.6833	0	13	1	5	4	72	37	24	15	3675	94	148	106	72	128	104	31	82	65	52	103	81	17
12432	0	0	0	0	0	0	0	0	0	0	0	0	0	0	4	2	80	3	4	1	1	3	0	0	1.3451	9.4569	1	7	2	2	3	48	42	39	13	1025	69	121	94	98	157	129	27	98	51	54	110	77	16
12460	0	0	0	0	0	0	0	0	0	0	0	0	0	0	3	2	28	2	2	1	1	2	0	0	0.7693	2.9319	0	0	1	2	3	25	10	27	14	2475	78	127	95	107	136	120	44	67	56	67	87	77	16
12467	0	1	0	0	0	0	0	0	0	0	0	0	0	1	3	2	56	3	2	2	1	3	0	0	1.0674	4.9417	1	31	1	12	3	94	61	33	14	855	80	97	90	74	121	100	23	74	41	43	87	61	14
12483	0	0	0	0	0	0	0	0	0	0	0	0	0	0	4	1	61	4	4	1	1	2	0	0	5.6432	34.3715	0	23	1	9	3	79	58	32	15	269	74	92	83	60	99	75	26	71	40	38	79	52	11
12488	0	0	0	0	0	0	0	0	0	0	0	0	0	0	4	1	69	3	4	1	1	2	0	0	12.6298	20.4597	1	0	2	6	4	82	77	41	4	880	77	126	101	98	176	142	49	101	67	64	128	93	14
12492	0	0	0	0	0	0	0	1	0	0	0	0	0	0	4	2	73	3	2	1	1	3	0	0	2.1157	15.1181	1	0	2	4	2	28	31	26	13	1000	80	97	89	84	117	103	45	69	56	60	88	74	13
12530	1	0	0	0	0	0	0	0	0	0	0	0	0	0	4	2	75	3	2	3	1	3	1	0	0.6146	4.9236	1	10	2	5	3	82	52	36	13	200	65	92	81	88	161	124	46	122	61	50	128	74	12
12531	0	1	0	0	0	0	0	1	0	0	0	0	0	1	4	2	77	3	2	1	1	3	1	1	8.0202	7.9014	1	26	1	16	4	133	82	50	15	218	77	184	115	40	112	74	12	81	53	20	91	59	12
12533	0	1	1	0	0	0	0	0	0	0	0	0	0	0	4	2	62	4	2	1	1	3	1	1	32.1626	33.8118	1	19	1	14	2	77	53	48	14	1048	82	138	106	111	215	146	42	114	61	68	140	90	5
12540	0	0	0	0	0	0	0	0	0	0	0	0	0	0	4	2	61	2	4	1	1	3	0	0	2.6219	10.4181	1	11	1	3	3	41	28	25	15	3300	77	101	88	86	121	106	37	63	49	58	75	68	13
12551	0	0	0	0	0	0	0	0	0	0	0	0	0	0	4	1	47	4	4	1	1	3	1	0	0.9981	21.5493	1	26	2	3	3	26	40	23	13	#NULL!	87	98	93	97	122	106	48	64	56	65	78	72	20
12589	0	1	1	0	0	0	0	1	0	0	0	0	0	0	2	1	74	3	#NULL!	1	1	3	0	0	6.8552	10.0396	0	15	2	6	4	68	44	41	11	1390	102	137	113	78	208	113	41	107	57	50	121	68	16
12594	0	0	0	0	0	0	0	0	0	0	0	0	0	0	4	1	21	4	2	1	1	1	0	0	1.8731	5.3292	0	0	1	2	4	25	4	12	15	3565	85	127	105	101	128	110	48	80	59	69	94	77	14
12608	0	0	0	0	0	0	0	0	0	0	0	0	0	0	4	2	42	5	#NULL!	1	1	3	0	0	1.0926	1.0951	0	0	1	4	4	13	13	22	14	2370	81	102	94	138	171	153	84	107	93	102	128	113	14
12613	0	1	0	0	0	0	1	0	0	0	0	0	0	0	4	2	60	3	1	1	1	1	0	0	87.6364	294.66	1	27	1	5	4	35	34	33	15	802	113	132	122	79	126	101	49	62	55	60	81	70	18
12618	0	0	0	0	0	0	0	0	0	0	0	0	0	0	4	2	23	4	4	1	1	3	0	0	2.0064	2.8583	1	18	1	8	1	45	24	19	9	1780	58	82	68	106	124	113	40	55	48	62	77	70	10
12635	1	0	0	0	0	0	0	0	0	0	0	0	0	0	3	2	79	3	2	1	1	1	0	0	2.203	25.0771	0	15	1	3	3	46	38	34	15	2805	61	149	92	94	145	123	44	108	63	63	115	83	11
12637	0	1	0	0	0	0	0	0	0	0	0	0	0	0	4	2	48	3	4	1	1	3	0	0	4.5376	8.3069	0	10	1	5	4	50	38	38	8	3233	76	122	99	105	249	146	61	114	79	74	138	95	16
12645	0	1	0	0	0	0	0	1	0	0	0	0	0	0	4	1	76	3	2	1	1	3	0	0	19.8242	19.8229	1	13	2	13	4	119	84	50	3	848	76	120	97	83	123	101	31	53	41	49	78	59	13
12655	1	0	0	0	0	0	0	1	0	0	0	0	0	0	4	2	77	3	2	1	1	1	0	0	1.9444	13.6882	1	10	1	6	4	42	43	37	15	835	93	110	99	83	120	105	50	80	59	61	94	75	21
12661	0	0	0	0	0	0	0	0	0	0	0	0	0	0	4	1	34	3	4	1	1	3	0	0	8.8509	12.8326	0	5	1	3	2	41	24	39	15	966	76	106	89	99	128	108	26	63	50	56	82	69	17
12662	0	1	0	0	0	0	0	0	0	0	0	0	0	0	4	1	76	3	2	1	1	3	0	0	1.0572	3.0069	0	5	1	2	4	48	41	30	15	1410	75	93	81	90	125	109	38	89	50	58	98	70	13
12664	0	0	0	0	0	0	0	1	0	0	0	0	0	0	4	2	71	3	1	1	1	1	0	0	1.6159	12.3069	1	8	1	6	3	24	24	25	14	3060	74	109	90	102	168	145	49	75	64	65	105	90	12
12670	0	0	0	0	0	0	0	0	0	0	0	0	0	0	5	2	50	2	#NULL!	1	1	2	0	0	10.7475	28.5819	0	-7	1	2	4	35	36	29	15	4805	57	116	91	92	166	122	56	80	69	66	111	87	20
12677	0	1	0	0	0	0	0	0	0	0	0	0	0	0	4	2	80	3	4	1	1	1	1	1	0.8328	0.3014	1	11	2	8	4	145	91	68	3	248	48	139	125	59	134	92	11	92	50	33	108	65	11
12686	1	1	0	0	0	0	0	1	0	0	0	0	0	0	4	2	70	4	4	1	1	3	1	1	2.0431	1.5076	1	20	1	11	4	66	57	48	15	1335	97	127	108	57	171	97	12	94	52	26	276	101	12
12688	0	1	0	0	0	0	0	0	0	0	0	0	0	0	4	2	71	3	2	1	1	3	0	0	4.6159	16.7014	1	0	1	6	4	76	51	31	14	1820	87	124	104	80	137	107	40	81	51	54	91	69	9
12697	0	0	0	0	0	0	0	0	0	0	0	0	0	0	4	2	26	4	4	1	1	3	0	0	0.4627	3.1125	0	0	1	3	0	20	21	27	15	425	65	85	75	123	144	136	62	81	71	87	102	93	10
12709	0	1	0	0	0	0	0	0	0	0	0	0	0	0	3	2	34	3	4	1	1	3	0	0	3.0062	5.2229	0	8	1	8	4	55	36	28	14	3310	82	121	96	96	135	112	44	70	57	62	86	75	17
12715	0	0	0	0	0	0	0	0	0	0	0	0	0	0	4	2	55	4	2	1	1	3	1	0	2.6503	14.1583	1	21	1	2	3	54	43	32	15	1340	114	154	127	97	146	126	61	84	75	80	102	92	17
12718	0	0	0	0	0	0	0	0	0	0	0	0	0	0	2	2	40	2	2	1	1	3	0	0	1.5376	10.7569	1	-1	1	2	3	35	9	23	15	1250	86	96	90	110	143	124	36	73	60	65	96	81	14
12741	0	0	0	0	0	0	0	0	0	0	0	0	0	0	5	1	37	3	4	1	1	3	0	0	3.1759	4.9771	0	8	1	4	4	30	24	37	15	3760	59	132	94	84	168	113	46	115	66	64	137	82	7
12754	0	1	0	0	0	0	0	0	0	0	0	0	0	0	4	2	38	5	4	1	1	3	1	0	0.996	5.7569	1	17	1	5	4	47	40	32	14	1991	93	126	109	93	131	113	49	78	62	64	93	79	9
12756	0	1	0	0	1	0	0	0	0	0	0	0	0	1	4	1	64	4	2	1	1	3	1	1	0.3357	0.1826	1	8	1	9	4	82	63	53	15	860	31	132	110	63	152	100	18	109	58	33	117	67	16
12760	0	0	0	0	0	0	0	0	0	0	0	0	0	0	4	2	55	4	2	1	1	2	0	0	1.3069	12.3063	1	12	1	3	1	21	29	24	15	2175	67	107	90	92	158	115	40	73	53	58	107	75	8
12761	0	1	0	0	0	0	0	0	0	0	0	0	0	0	4	1	54	1	2	1	1	1	0	0	9.6488	20.4576	0	-4	1	4	4	58	42	36	15	1484	65	108	89	86	129	101	29	89	53	50	104	70	11
12768	0	0	0	0	0	0	0	0	0	0	0	0	0	0	4	1	23	4	4	1	1	3	1	1	11.3682	11.3507	1	24	1	5	4	38	27	36	15	1100	94	122	104	91	166	110	53	92	64	65	115	78	26
12770	0	0	0	0	0	0	0	0	0	0	0	0	0	0	4	1	57	3	1	1	1	3	0	0	1.7661	1.7667	1	7	1	2	2	30	21	30	15	2222	66	88	76	109	171	158	54	82	67	84	108	98	12
12772	0	0	0	0	0	0	0	0	0	0	0	0	0	0	4	2	52	2	#NULL!	1	1	3	0	0	30.8696	30.8333	1	11	1	7	1	58	40	42	7	1815	69	84	77	107	154	125	55	81	66	73	104	85	9
12775	1	0	0	0	0	0	0	0	0	0	0	1	0	0	4	1	65	2	1	1	1	3	1	0	10.8816	16.3507	1	11	1	6	4	56	43	40	15	853	71	103	88	83	141	110	46	100	59	26	104	73	9
12777	1	0	0	0	0	0	0	0	0	0	0	0	0	0	1	2	49	4	2	1	1	1	0	0	2.9367	19.3889	0	28	1	5	2	34	35	32	14	1156	66	84	75	110	157	135	67	100	76	86	151	102	11
12797	0	0	0	0	0	0	0	0	0	0	0	0	0	0	4	1	66	4	2	1	1	1	0	0	3.0607	8.309	0	3	1	3	3	42	21	27	15	5870	89	110	97	108	181	140	46	87	64	68	125	92	13
12815	0	0	0	0	0	0	0	0	0	0	0	0	0	0	4	1	61	4	2	1	1	3	0	0	4.7549	14.7389	0	10	2	3	2	48	46	41	12	860	86	138	101	87	133	106	38	78	59	49	94	71	16
12830	0	0	0	0	0	0	0	1	0	0	0	0	0	0	4	1	70	3	2	2	1	3	0	0	1.7525	5.6097	0	12	1	3	1	45	39	23	15	2400	55	71	60	91	138	116	21	61	35	45	74	62	15
12837	0	0	0	0	0	0	0	0	0	0	0	0	0	0	4	1	56	4	2	1	1	3	0	0	0.9332	14.316	0	3	2	3	2	43	25	16	13	3055	68	86	76	78	113	99	40	64	46	53	79	64	15
12840	0	0	0	0	0	0	0	1	0	0	0	0	0	0	4	1	45	2	2	1	1	3	0	0	1.3599	3.2715	1	19	1	5	1	23	31	25	14	925	84	104	94	99	112	106	44	58	51	64	75	69	#NULL!
12858	0	0	0	0	0	0	0	0	0	0	0	0	0	0	5	1	75	3	4	1	1	3	0	0	0.9915	4.0306	1	0	2	3	3	54	46	33	13	980	64	89	73	98	177	152	42	137	67	71	150	96	10
12899	0	0	0	0	0	0	0	1	0	0	0	0	0	0	4	2	62	3	2	1	1	1	0	0	3.1459	12.9431	1	13	1	5	4	63	43	32	15	1192	91	129	104	90	207	131	49	85	61	67	166	87	20
12909	0	1	0	0	0	0	0	1	0	0	0	0	0	1	5	1	47	4	2	1	1	3	1	1	10.2004	10.1493	1	33	1	18	4	118	66	51	15	217	89	109	99	88	149	113	36	66	49	51	87	66	16
12916	1	0	0	0	0	0	0	1	0	0	0	0	0	0	5	2	78	3	2	1	1	3	1	0	2.2262	7.0451	1	20	1	7	3	64	50	43	15	1764	65	130	97	89	185	115	45	90	60	58	125	78	12
12954	1	0	0	0	0	0	0	0	0	0	0	0	0	0	4	2	60	4	2	2	1	3	0	0	1.1902	4.7708	1	10	1	3	1	23	20	27	14	2300	68	86	78	98	146	118	42	96	55	62	110	76	14
12961	1	1	0	0	0	0	0	1	0	0	0	1	0	0	2	1	68	3	2	1	1	1	0	0	1.9867	41.5354	1	29	1	5	2	64	37	28	15	33	70	80	75	114	144	129	30	43	37	53	80	63	12
12968	0	0	0	0	0	0	0	0	0	0	0	0	0	0	4	2	67	3	2	1	1	3	0	0	1.3102	13.5694	1	12	1	4	4	69	48	22	15	1800	85	117	102	106	142	122	50	68	60	70	94	80	11
13005	0	0	0	0	0	0	0	0	0	0	0	0	0	0	4	2	61	4	2	1	1	1	0	0	1.3169	8.7146	1	18	2	3	4	48	45	37	10	1105	69	100	80	89	131	107	39	64	51	57	85	71	8
13014	0	0	0	0	0	0	0	1	0	0	0	0	0	0	4	1	47	2	1	1	1	1	0	0	8.4178	17.5194	1	17	1	4	3	21	25	31	15	2005	91	108	100	78	132	102	37	83	58	54	93	72	17
13018	0	0	0	0	0	0	0	0	0	0	0	0	0	0	4	1	20	1	4	1	1	3	0	0	1.9914	6.6715	0	11	1	4	4	25	26	30	8	6410	92	122	105	101	136	122	53	94	61	72	108	81	13
13019	0	0	0	0	0	0	0	0	0	0	0	0	0	0	4	1	46	2	4	1	1	3	0	0	0.7669	37.8639	1	0	1	5	4	58	44	20	15	1760	104	122	113	98	127	107	38	56	47	60	77	67	12
13033	0	1	0	0	0	0	0	0	0	0	0	0	0	0	2	2	37	3	4	19	1	1	0	0	7.4013	12.1361	1	13	1	10	4	65	39	35	15	32	92	128	105	77	190	107	37	111	52	51	135	70	14
13036	0	1	0	0	0	0	0	0	0	0	0	0	0	0	4	1	55	2	4	3	1	3	0	0	2.0748	4.7868	1	20	1	5	4	45	33	30	15	1050	70	106	85	93	112	106	45	63	55	59	74	67	14
13041	0	0	0	0	0	0	0	0	0	0	0	0	0	0	5	1	62	3	2	1	1	3	0	0	5.1317	7.6389	0	-4	1	6	4	42	41	35	15	2060	93	111	100	95	196	167	50	114	90	61	131	107	17
13050	0	1	0	0	0	0	0	0	0	0	0	0	0	0	4	1	69	3	2	1	1	3	1	0	27.6797	30.7618	1	12	1	9	4	68	59	51	7	835	91	112	100	106	208	130	52	84	67	71	147	90	14
13057	1	0	0	0	0	0	0	0	0	0	0	0	0	0	4	1	73	3	#NULL!	1	1	1	0	0	8.7216	13.3167	1	8	1	4	4	30	43	35	15	741	64	94	80	110	199	156	49	98	68	69	126	98	16
13072	0	0	0	0	0	0	0	0	0	0	0	0	0	0	4	1	47	4	4	2	1	1	0	0	1.1301	2.0833	0	0	1	2	4	19	12	27	14	2190	72	110	87	91	145	125	51	82	66	64	99	85	11
13083	0	0	0	0	0	0	0	0	0	0	0	0	0	0	4	2	42	4	2	1	1	2	0	0	20.8136	51.575	0	0	1	4	4	33	31	44	15	9580	71	115	93	86	167	134	39	79	65	53	114	87	6
13095	0	0	0	0	0	0	0	0	0	0	0	0	0	0	2	1	39	4	4	1	1	3	0	0	1.7742	7.5688	0	3	1	2	3	47	21	23	12	1735	83	137	110	123	159	137	78	111	95	94	127	109	14
13098	0	1	0	0	0	0	0	0	0	0	0	0	0	0	4	2	71	3	2	1	1	3	1	1	6.6011	6.4313	1	12	1	8	4	67	69	51	15	903	85	132	100	48	196	108	24	120	64	32	150	81	11
13107	0	0	0	0	0	0	0	0	0	0	0	0	0	0	5	2	78	3	2	1	1	2	0	0	11.7473	26.5174	1	0	1	5	3	55	49	47	10	1399	86	133	109	98	201	142	55	116	75	66	151	96	7
13123	0	0	0	0	0	0	0	0	0	0	0	0	0	0	4	2	62	3	2	1	1	3	0	0	0.9332	12.359	1	5	1	8	2	61	47	30	15	199	68	85	76	90	152	119	40	80	58	57	128	77	10
13124	1	0	0	0	0	0	0	0	0	0	0	0	0	0	4	2	70	3	2	1	1	3	0	0	7.8312	14.9743	1	5	1	3	3	42	36	33	15	882	73	108	89	98	137	117	46	88	55	65	104	75	14
13152	0	0	0	0	0	0	0	0	0	0	0	0	0	0	4	1	53	4	2	1	1	3	0	0	1.51	4.5667	0	6	1	4	4	35	25	36	14	3525	84	134	98	93	220	120	54	138	73	67	165	91	16
13161	0	0	0	0	0	0	0	0	0	0	0	0	0	0	4	1	78	3	#NULL!	1	1	3	1	1	4.1961	15.0201	1	0	1	5	4	48	51	37	15	2855	69	104	85	67	148	105	28	68	46	41	101	66	12
13162	0	0	0	0	0	0	0	1	0	0	0	0	0	0	4	2	79	3	#NULL!	1	1	1	0	0	1.244	14.6576	0	34	2	4	3	35	53	34	12	2275	62	94	75	91	155	133	52	77	64	66	107	89	12
13165	0	0	0	0	0	0	0	1	0	0	0	0	0	0	4	2	50	3	4	1	1	3	0	0	2.7819	10.9722	1	16	1	6	3	33	36	33	15	2110	77	98	87	98	146	124	53	85	66	68	104	86	12
13174	0	0	0	0	0	0	0	0	0	0	0	0	0	0	4	1	58	3	#NULL!	1	1	3	0	0	4.1397	8.2132	0	4	1	8	4	50	39	38	15	1520	92	112	100	72	134	100	27	81	51	48	167	74	7
13185	0	1	0	0	0	0	0	0	0	0	0	0	0	0	2	2	48	3	4	1	1	1	0	0	2.4376	6.8854	0	5	1	6	2	48	28	24	15	#NULL!	53	88	70	115	216	173	70	128	92	85	157	119	14
13192	0	0	0	0	0	0	0	1	0	0	0	0	0	0	3	1	52	2	1	3	1	3	0	0	3.8705	8.0535	0	12	1	7	2	85	46	31	15	42	64	78	74	89	167	116	33	78	50	52	108	73	12
13200	0	0	0	0	0	0	0	0	0	0	0	0	0	0	5	1	23	4	4	1	1	2	0	0	3.5184	35.7361	0	3	1	5	3	45	27	33	15	1960	83	140	110	97	141	121	28	69	57	46	83	74	8
13203	0	0	0	0	0	0	0	0	0	0	0	0	0	0	4	1	58	4	4	2	1	2	0	0	0.9114	24.3125	1	12	1	2	3	34	35	25	15	1618	83	115	98	68	127	101	43	92	52	56	97	67	12
13207	0	0	0	0	0	0	0	0	0	0	0	0	0	0	4	2	73	3	2	1	1	3	1	0	8.3675	13.3479	1	24	1	7	3	51	37	25	15	1440	70	93	82	81	113	95	24	80	38	43	89	57	11
13214	0	0	0	0	0	0	0	0	0	0	0	0	0	0	4	1	49	3	2	2	1	3	0	0	0.896	3.8625	0	2	1	2	1	54	29	27	15	1100	72	84	78	88	107	98	45	52	48	43	64	57	11
13253	0	1	0	0	0	0	0	0	0	0	0	0	0	0	1	2	79	3	2	2	1	3	0	0	1.0086	10.6813	0	3	1	4	2	45	37	30	14	3990	64	83	74	67	119	95	28	68	46	38	76	57	15
13258	0	1	0	0	0	0	0	0	0	0	0	0	0	0	4	2	56	4	4	2	1	3	0	0	3.9332	6.0319	0	10	1	11	3	70	49	37	15	1505	55	125	85	85	181	114	38	101	68	66	114	82	7
13263	0	1	0	0	0	0	0	1	0	0	0	0	0	1	5	1	44	4	2	1	1	3	0	0	3.9395	3.9403	0	21	1	10	3	70	43	39	15	239	106	120	114	114	188	144	64	99	77	80	127	96	20
13289	0	0	0	0	0	0	0	0	0	0	0	0	0	0	2	1	31	4	2	1	1	1	0	0	9.2164	14.1639	0	13	1	4	4	52	30	40	15	850	95	133	114	93	159	123	50	90	70	65	107	85	12
13294	0	0	0	0	0	0	0	1	0	0	0	0	0	0	5	2	52	4	2	1	1	3	0	0	3.0354	4.6785	1	18	1	5	2	58	36	26	15	725	60	79	69	89	142	114	41	93	61	59	109	78	11
13302	0	1	0	0	0	0	0	1	0	0	0	0	0	0	4	2	40	4	2	1	1	3	1	0	3.3505	53.0403	1	18	1	7	4	93	50	37	15	705	85	139	114	90	147	121	37	84	70	65	105	87	23
13305	0	1	0	0	0	0	0	0	0	0	0	0	0	0	4	2	54	3	4	1	1	1	0	0	3.8634	7.0076	1	19	1	9	3	61	43	23	15	1860	59	74	62	75	103	89	35	89	49	48	93	62	13
13306	0	0	0	0	0	0	0	1	0	0	0	0	0	0	4	2	48	1	4	1	1	3	0	0	1.382	3.4799	1	14	1	3	4	32	21	21	15	1785	70	102	91	94	145	110	50	88	68	62	96	77	12
13318	0	0	0	0	0	0	0	0	0	0	0	0	0	0	4	1	34	5	4	1	1	3	0	0	2.0217	3.85	0	9	1	3	4	46	23	26	14	3440	76	118	95	79	179	102	29	116	49	47	137	67	22
13320	0	0	0	0	0	0	0	0	0	0	0	0	0	0	5	2	41	5	#NULL!	1	1	2	0	0	0.839	5.9514	0	0	1	2	1	30	17	26	14	730	80	108	93	129	174	145	81	107	91	100	130	110	8
13322	0	0	0	0	0	0	0	0	0	0	0	0	0	0	2	2	61	1	4	1	1	2	0	0	1.1101	16.441	1	17	1	3	2	37	28	19	15	1010	68	100	83	89	128	108	22	68	56	51	91	74	10
13325	0	1	0	1	0	0	0	0	0	0	0	0	0	0	4	2	67	3	2	1	1	3	1	1	16.3064	15.5618	1	21	2	9	4	85	62	41	11	1925	100	245	150	87	182	132	50	114	75	62	130	94	18
13335	0	0	0	0	0	0	0	1	0	0	0	0	0	0	2	1	79	3	#NULL!	1	1	3	0	0	1.6097	7.4917	1	20	1	3	2	81	38	39	14	769	47	88	68	111	166	135	23	115	56	53	123	82	13
13355	0	0	0	0	0	0	0	0	0	0	0	0	0	1	4	1	26	2	4	3	1	3	0	0	5.5742	23.1458	1	8	1	3	4	40	20	21	15	#NULL!	105	127	116	90	117	102	33	55	44	52	76	63	13
13364	1	0	0	0	0	0	0	0	0	0	0	1	0	0	4	1	79	3	2	1	1	3	0	0	4.8083	8.7785	0	11	2	6	4	43	43	42	8	1245	59	96	73	88	162	131	32	96	49	62	115	77	14
13379	0	0	0	0	0	0	0	0	0	0	0	0	0	0	2	2	49	4	2	1	1	3	0	0	2.2309	6.1458	0	8	1	4	4	32	29	32	15	2000	83	114	99	81	166	127	48	97	76	59	120	93	11
13396	1	0	0	0	0	0	0	0	0	0	0	0	0	1	4	2	76	3	2	1	1	1	1	1	20.6189	20.6208	1	27	1	8	4	53	45	43	15	1397	86	140	112	70	180	104	37	90	57	51	144	74	14
13401	0	1	0	0	0	0	0	0	0	0	0	0	0	0	4	2	63	4	2	1	1	3	0	0	2.7952	6.6785	1	0	1	7	2	51	40	36	15	909	66	82	73	70	146	112	48	69	56	55	87	73	13
13414	0	0	0	0	0	0	0	0	0	0	0	0	0	0	4	2	52	4	2	1	1	3	0	0	4.8306	8.8965	0	0	1	3	4	42	18	33	15	1170	100	111	104	82	115	101	32	65	54	49	78	70	18
13419	0	0	0	0	0	0	0	0	0	0	0	0	0	0	2	2	24	4	1	1	1	2	0	0	1.3913	6.8	0	3	1	3	4	41	23	26	15	3220	69	121	93	92	174	135	52	95	69	67	113	87	10
13436	1	0	0	0	0	0	0	0	0	0	0	0	0	0	1	1	78	3	3	2	1	1	1	1	10.4699	14.6993	1	22	1	5	4	52	56	36	15	2590	68	134	87	88	159	119	14	86	44	51	103	69	15
13439	0	0	0	0	0	0	0	0	0	0	0	0	0	0	5	2	51	4	#NULL!	1	1	3	0	0	3.1576	4.8799	1	16	1	10	4	69	51	41	15	322	83	108	102	100	176	127	57	93	68	74	123	88	16
13453	0	0	0	0	0	0	0	1	0	0	0	0	0	0	4	1	78	3	#NULL!	1	1	3	0	0	13.5768	13.5778	1	15	1	8	4	57	64	42	15	2120	65	164	86	65	153	108	30	68	48	44	92	67	18
13476	0	0	0	0	0	0	0	1	0	0	0	0	0	0	4	2	79	3	2	2	1	1	0	0	8.8659	12.7472	1	10	2	7	4	63	68	49	8	261	74	108	86	98	162	128	51	72	61	66	96	81	7
13493	0	1	0	0	0	0	0	0	0	0	0	0	0	0	4	2	54	3	4	1	1	3	0	0	6.922	6.9229	1	11	2	10	3	72	46	39	10	2384	41	126	86	72	129	101	33	78	48	48	88	66	8
13494	0	1	0	0	0	0	0	0	0	0	0	0	0	0	4	2	62	3	2	2	1	3	0	0	3.8056	6.8104	0	5	1	7	4	68	46	38	14	328	70	107	86	99	147	125	39	68	55	57	87	72	14
13498	1	0	0	0	0	0	0	1	0	0	0	0	0	0	4	2	75	3	2	1	1	3	0	0	28.9226	28.9069	1	24	1	5	4	64	62	48	15	905	98	160	120	71	147	108	36	81	58	48	159	76	9
13514	0	0	0	0	0	0	0	0	0	0	0	0	0	0	4	1	79	3	#NULL!	2	1	1	1	1	0.8805	0.7736	1	0	1	7	3	61	48	50	15	1680	101	127	115	76	142	103	46	84	62	56	269	83	17
13530	0	0	0	0	0	0	0	0	0	0	0	0	0	0	5	2	51	4	#NULL!	1	1	2	0	0	1.4619	17.6118	0	-9	1	3	3	23	14	35	14	1410	90	110	100	128	189	158	78	106	89	96	126	112	11
13536	0	0	0	0	0	0	0	1	0	0	0	0	0	0	1	1	54	3	2	1	1	3	0	0	3.6678	5.4604	1	12	1	2	3	50	30	24	15	970	72	93	82	110	169	140	43	67	54	62	94	78	19
13543	0	0	0	0	0	0	0	0	0	0	0	0	0	0	4	2	63	3	2	1	1	3	0	0	37.2822	37.0674	1	5	1	8	3	51	44	35	15	4140	109	132	121	94	172	118	43	76	57	63	108	77	8
13553	0	0	0	0	0	0	0	0	0	0	0	0	0	0	4	2	80	4	2	1	1	2	0	0	16.1849	19.2493	1	0	1	8	3	47	48	41	15	2310	88	117	105	70	199	111	33	82	53	49	127	72	11
13557	0	0	0	0	0	0	0	0	0	0	0	0	0	0	2	2	35	2	4	1	1	3	0	0	1.8966	2.8069	0	0	1	2	4	21	6	30	14	3200	71	111	95	101	156	131	38	77	64	61	97	86	12
13579	1	0	0	0	0	0	0	0	0	0	0	0	0	0	4	2	79	4	2	2	1	2	0	0	4.4284	17.9799	0	17	1	6	3	52	36	31	15	2515	74	93	82	90	142	118	40	55	46	57	83	67	14
13599	1	1	0	0	0	0	1	0	0	0	0	0	0	0	4	2	71	3	2	1	1	1	0	0	13.0621	75.7215	1	9	1	4	4	34	35	33	15	1393	73	104	86	75	200	134	36	73	48	45	94	67	12
13611	0	0	0	0	0	0	0	0	0	0	0	0	0	0	5	1	67	4	2	1	1	3	0	0	11.5842	21.9063	0	8	1	3	1	49	32	35	15	1901	64	83	74	87	130	108	31	61	40	50	84	62	6
13614	0	0	0	0	0	0	0	1	0	0	0	0	0	0	4	1	56	4	2	1	1	3	0	0	4.1345	30.7278	0	7	1	10	4	71	49	30	15	3155	93	132	113	86	166	112	48	82	59	63	110	76	17
13622	0	0	0	0	0	0	0	1	0	0	0	0	0	0	4	1	80	3	#NULL!	4	1	2	0	0	8.0994	25.609	0	28	1	2	3	49	53	40	15	947	81	129	100	93	208	165	49	115	89	61	143	114	9
13628	1	0	0	0	0	0	0	1	0	0	0	0	0	0	4	2	75	4	2	2	1	1	0	0	4.2481	32.3146	0	17	1	7	3	67	44	28	14	1155	60	83	73	74	169	101	35	91	50	44	120	66	12
13633	0	0	0	0	0	0	0	0	0	0	0	0	0	0	2	1	58	2	3	2	1	3	0	0	2.1426	6.0972	0	0	1	2	3	24	18	26	14	#NULL!	72	100	85	98	143	113	44	85	63	63	99	80	17
13641	1	0	1	0	0	0	0	1	0	0	0	0	0	0	4	2	75	3	4	1	1	3	0	0	3.7724	9.5806	1	15	1	2	4	57	50	47	14	935	34	147	103	74	132	105	26	85	56	46	104	73	19
13642	0	1	0	0	0	0	0	0	0	0	0	0	0	0	4	1	77	3	2	1	1	3	0	0	9.7638	14.6375	1	0	1	2	3	51	45	42	15	1409	69	116	82	73	167	115	31	104	50	48	107	71	10
13646	0	0	0	0	0	0	0	0	0	0	0	0	0	0	4	1	74	3	2	1	1	3	0	0	8.6788	8.6639	1	14	1	6	3	37	44	38	15	845	52	95	64	83	143	110	26	78	51	47	102	72	16
13657	0	0	0	0	0	0	0	0	0	0	0	0	0	0	4	1	73	3	#NULL!	1	1	1	0	0	0.8214	8.7632	1	5	1	2	1	56	60	28	15	750	38	51	45	86	125	107	30	50	40	52	76	63	13
13660	0	0	0	0	0	0	0	0	0	0	0	0	0	0	4	2	40	3	4	1	1	3	0	0	1.663	2.6792	1	-7	1	4	3	45	21	24	10	2850	75	101	84	96	136	114	31	80	64	59	88	74	12
13664	0	1	0	0	0	0	0	1	0	0	0	0	0	0	4	2	67	3	2	1	1	3	0	0	12.3126	16.8333	1	18	1	5	4	37	43	17	15	1975	62	97	75	109	163	130	34	89	55	61	106	80	14
13666	0	0	0	0	0	0	0	0	0	0	0	0	0	0	4	1	51	4	2	2	1	1	0	0	2.5482	5.6132	0	5	1	7	0	39	34	31	8	2885	46	78	59	84	117	99	49	70	60	58	81	69	15
13675	0	0	0	0	0	0	0	0	0	0	0	0	0	0	4	2	73	3	#NULL!	1	1	2	0	0	2.3424	5.3458	1	-4	2	3	2	33	36	34	10	2880	59	93	70	100	160	127	48	73	58	65	106	81	16
13705	0	0	0	0	0	0	0	0	0	0	0	0	0	0	4	2	40	4	4	1	1	3	0	0	9.8113	34.8583	1	14	1	12	3	58	45	14	15	4300	92	105	98	101	137	126	47	80	71	66	97	89	15
13710	0	0	1	0	0	0	0	1	0	0	0	0	0	0	4	2	50	4	2	1	1	3	0	0	26.8123	26.8132	0	15	1	4	3	30	26	38	15	2445	76	128	92	103	145	122	64	92	78	76	108	91	12
13718	0	0	0	0	0	0	0	0	0	0	0	0	0	0	5	1	60	1	2	1	1	3	0	0	2.0792	6.7535	1	12	2	3	3	45	44	25	11	2085	64	79	71	83	179	126	31	88	57	48	121	78	15
13720	0	0	0	0	0	0	0	0	0	0	0	0	0	0	4	1	59	3	1	1	1	3	1	1	6.0447	5.5833	1	13	1	4	3	41	40	47	15	1048	80	129	101	89	178	118	11	100	58	52	110	78	12
13725	0	0	0	0	0	0	0	0	0	0	0	0	0	0	4	2	39	4	2	2	1	1	0	0	5.0529	56.6257	1	36	1	2	4	24	24	26	15	1810	76	101	86	100	161	124	53	103	76	71	137	95	14
13731	0	0	0	0	0	0	0	0	0	0	0	0	0	0	4	1	50	3	2	1	1	3	0	0	1.0188	6.8535	1	5	2	6	3	62	34	20	13	#NULL!	77	91	83	98	155	123	20	131	47	42	137	65	11
13737	0	0	0	0	0	0	0	0	0	0	0	0	0	0	5	2	50	4	#NULL!	1	1	2	0	0	0.978	18.809	0	-7	1	6	3	38	27	38	10	1735	87	109	96	120	164	136	62	90	73	59	107	92	12
13740	0	0	0	0	0	0	0	0	0	0	0	0	0	0	1	1	58	3	4	2	1	3	0	0	14.137	14.1167	1	14	1	10	3	32	32	35	15	2710	59	111	83	91	137	111	49	82	61	61	91	73	13
13745	0	0	0	0	0	0	0	1	0	0	0	0	0	0	4	1	66	3	#NULL!	1	1	1	0	0	3.3139	11.0382	1	12	1	3	2	44	24	18	15	5070	84	114	97	113	150	129	39	62	50	68	97	79	18
13748	1	0	0	0	0	0	0	0	0	0	0	0	0	0	4	2	64	4	2	1	1	3	0	0	2.0495	8.8278	1	17	1	2	4	56	22	33	15	1225	73	141	84	116	141	126	38	69	49	66	90	74	16
13752	1	0	0	0	0	0	0	0	0	0	0	0	0	0	2	2	77	3	2	1	1	3	0	0	1.1459	13.9174	1	10	1	6	3	41	33	24	14	#NULL!	79	109	92	93	150	120	33	70	56	61	93	77	9
13753	1	0	0	0	0	0	0	1	0	0	0	0	0	0	2	2	77	3	2	1	1	3	0	0	2.0456	21.6688	1	22	2	7	2	52	59	24	13	1460	88	109	99	88	116	103	51	85	64	63	95	77	9
13761	0	0	0	0	0	0	0	1	0	0	0	0	0	0	2	1	70	3	4	2	1	3	0	0	0.828	9.0771	0	18	1	6	0	35	25	22	14	#NULL!	67	83	75	86	170	134	32	83	58	45	103	77	9
13764	0	1	0	0	0	0	0	0	0	0	0	0	0	0	4	2	78	3	2	1	1	3	0	0	1.1892	5.9313	0	12	1	6	3	43	30	28	15	1485	51	75	63	92	120	104	38	75	49	57	86	67	10
13778	0	0	0	0	0	0	0	1	0	0	0	0	0	0	4	2	75	3	2	1	1	3	0	0	2.3267	3.9882	1	12	1	7	4	78	33	37	14	1020	73	116	86	77	198	115	25	81	44	6	107	65	20
13792	0	1	0	0	0	0	0	0	0	0	0	0	0	0	5	1	59	1	2	1	1	3	0	0	3.2097	5.7465	0	5	1	8	4	35	32	33	15	2445	84	119	101	87	134	110	45	68	55	58	90	74	10
13794	1	0	0	0	0	0	0	0	0	0	0	0	0	0	4	1	67	3	2	2	1	3	0	0	3.3935	4.2069	0	18	1	2	3	40	34	33	15	795	98	139	114	75	138	98	46	70	60	58	112	71	9
13835	0	1	0	0	0	0	0	0	0	0	0	0	0	0	4	1	63	3	2	1	1	2	0	0	2.8815	18.825	1	3	1	5	4	48	46	40	15	3835	73	105	90	85	122	105	51	74	64	44	94	80	11
13837	0	1	0	0	0	0	0	0	0	0	0	0	0	0	2	1	73	3	#NULL!	2	1	3	0	0	3.5902	7.2222	1	15	1	7	3	49	40	25	13	20	78	95	87	116	163	143	47	77	56	65	98	78	15
13839	0	0	0	0	0	0	0	0	0	0	0	0	0	0	4	2	67	3	4	2	1	1	0	0	1.4609	6.2896	1	2	1	2	3	47	37	34	14	755	95	127	113	117	175	149	67	111	83	83	127	100	17
13845	0	0	0	0	0	0	0	0	0	0	0	0	0	0	2	1	78	1	#NULL!	1	1	3	0	0	2.3224	7.2993	1	3	1	6	4	68	48	45	15	914	64	112	81	92	237	143	45	180	69	58	194	89	18
13847	1	0	0	0	0	0	0	1	0	0	0	0	0	0	3	1	80	3	2	1	1	3	1	1	2.826	6.4396	1	29	2	8	4	89	54	38	10	579	85	96	91	91	123	104	30	74	58	53	92	74	12
13867	0	0	0	0	0	0	0	0	0	0	0	0	0	0	2	2	41	2	3	1	1	2	0	0	0.9198	11.3542	0	9	1	2	3	45	21	13	14	4320	90	114	101	94	150	123	44	77	59	63	101	80	9
13882	0	0	0	0	0	0	0	1	0	0	0	1	0	0	2	1	70	3	#NULL!	4	1	3	1	0	1.031	25.3903	1	24	1	4	3	35	29	21	15	#NULL!	93	107	101	78	122	102	32	91	46	51	97	65	11
13897	0	0	0	0	0	0	0	0	0	0	0	0	0	0	5	2	66	4	#NULL!	1	1	1	0	0	0.568	6.4813	1	16	1	7	3	57	41	31	14	66	77	93	86	105	156	123	31	64	49	57	93	71	18
13907	0	0	0	0	0	0	0	0	0	0	0	0	0	0	4	1	65	4	4	1	1	2	0	0	10.77	18.6361	0	5	1	5	2	43	42	32	15	4120	58	75	63	84	147	116	36	65	53	15	92	71	13
13909	0	0	0	0	0	0	0	0	0	0	0	0	0	0	4	2	27	4	#NULL!	1	1	2	0	0	9.5109	22.2757	0	0	1	4	4	45	27	32	15	3425	83	112	91	88	173	124	31	96	71	50	112	88	16
13920	0	0	0	0	0	0	0	0	0	0	0	0	0	0	4	2	51	3	2	1	1	3	0	0	5.3782	5.3681	1	11	1	5	4	60	47	36	9	1450	62	122	81	81	205	122	36	102	62	52	136	82	9
13922	0	0	0	0	0	0	0	0	0	0	0	0	0	0	4	2	49	3	4	1	1	3	0	0	5.5444	10.5306	0	5	1	7	3	74	46	33	15	740	44	66	54	83	138	103	38	71	54	53	91	71	9
13931	1	0	0	0	0	0	0	1	0	0	0	0	0	0	4	2	71	3	3	1	1	3	0	0	2.8238	9.375	1	20	1	4	3	35	39	42	13	2455	80	121	96	101	154	132	32	85	59	61	108	83	19
13938	0	1	0	0	0	0	0	0	0	0	0	0	0	0	3	2	73	3	#NULL!	1	1	3	0	0	4.949	7.9292	0	3	1	7	3	45	40	34	15	2445	49	94	69	80	145	110	43	72	57	54	91	74	16
13940	0	0	0	0	0	0	0	1	0	0	0	0	0	0	4	1	78	3	#NULL!	1	1	3	0	0	1.5053	14.3549	1	22	1	5	3	42	51	34	14	3010	67	100	85	92	169	119	35	97	55	54	116	77	18
13943	0	0	0	0	0	0	0	0	0	0	0	0	0	0	5	2	52	4	2	1	1	3	1	1	0.8766	0.7104	1	5	1	13	4	115	76	50	15	90	23	122	105	26	155	96	23	93	64	24	107	72	19
13944	0	0	0	0	0	0	0	0	0	0	0	0	0	0	4	1	58	3	#NULL!	2	1	3	0	0	3.0848	9.7944	1	6	1	3	2	61	29	27	15	877	65	80	75	121	156	137	38	92	62	59	102	84	13
13960	0	0	0	0	0	0	0	0	0	0	0	0	0	0	2	1	44	4	4	2	1	3	0	0	8.7147	8.7153	0	3	1	2	3	43	26	42	15	1210	107	151	125	97	201	139	51	102	75	66	134	97	7
13985	0	0	0	0	0	0	0	0	0	0	0	0	0	0	2	2	51	4	2	1	1	3	0	0	5.2623	10.309	0	8	1	8	3	73	47	33	14	334	106	116	111	92	155	109	54	73	63	67	100	78	9
13990	0	1	0	0	0	0	0	1	0	0	0	0	0	0	4	1	76	3	#NULL!	1	1	3	0	0	14.4576	14.4653	1	31	1	9	3	65	55	43	15	313	68	113	75	86	133	114	54	83	68	67	101	85	15
13992	1	0	0	0	0	0	0	0	0	0	0	0	0	0	4	2	76	3	2	1	1	1	0	0	31.8913	34.1875	1	13	1	9	4	58	35	38	15	1414	82	112	98	73	179	111	48	83	64	59	107	79	19
14007	0	0	0	0	0	0	0	0	0	0	0	0	0	0	5	2	21	4	4	1	1	2	0	0	15.2574	20.4708	0	0	1	7	4	24	24	31	15	5320	98	127	112	108	172	131	57	91	71	73	108	89	7
14031	0	0	0	0	0	0	0	0	0	0	0	0	0	0	4	1	66	3	1	2	1	3	0	0	0.9582	4.9681	1	11	1	7	2	27	28	30	14	1075	50	65	56	86	150	109	31	67	49	56	98	70	16
14037	0	0	0	0	0	0	0	0	0	0	0	0	0	0	4	2	50	4	2	1	1	3	0	0	2.7023	8.9701	1	18	1	4	2	35	35	19	13	2465	48	71	54	98	152	125	49	80	69	65	104	88	9
14044	0	0	0	0	0	0	0	0	0	0	0	0	0	0	1	2	67	3	2	1	1	1	0	0	3.5481	9.1667	0	18	1	12	4	103	67	45	3	4308	79	130	103	110	221	169	56	108	82	69	153	113	6
14058	1	0	0	0	0	0	0	0	0	0	0	0	0	0	4	2	48	4	2	1	1	3	1	1	8.0229	7.8764	1	14	1	7	4	71	31	39	15	1805	55	159	117	73	159	119	39	103	77	53	124	89	16
14060	0	0	0	0	0	0	0	0	0	0	0	0	0	0	4	2	55	4	2	1	1	3	0	0	2.1148	4.9694	0	3	1	8	4	55	32	25	15	2856	61	91	73	83	158	115	35	107	77	55	119	86	15
14078	0	0	0	0	0	0	0	0	0	0	0	0	0	0	4	2	40	5	4	1	1	2	0	0	1.748	57.4292	0	0	1	3	4	44	7	27	14	1660	75	116	98	107	157	134	59	139	79	26	140	93	10
14079	1	0	0	0	0	0	0	1	0	0	0	0	0	0	4	2	76	3	1	1	1	3	0	0	23.0486	57.0257	0	26	1	6	3	44	56	36	15	3000	86	157	99	69	189	96	36	120	50	31	245	72	11
14094	0	0	1	0	0	0	0	0	0	0	0	0	0	0	2	1	75	3	4	1	1	3	0	0	1.1651	7.8181	1	21	1	4	3	30	31	21	15	2134	70	92	76	103	135	112	50	90	62	68	101	79	16
14098	0	0	0	0	0	0	0	0	0	0	0	0	0	0	4	1	62	4	2	2	1	2	0	0	1.2154	11.8139	1	16	1	4	2	78	34	30	14	762	97	121	105	87	123	106	41	69	58	37	77	68	9
14101	1	0	1	0	0	0	1	1	0	0	0	0	0	0	4	2	77	3	2	2	1	3	0	0	3.4449	8.2597	1	10	1	4	2	53	35	23	15	2900	63	80	71	90	144	111	26	54	44	48	82	66	22
14104	0	0	0	0	0	0	0	1	0	0	0	0	0	0	4	2	62	4	2	2	1	1	0	0	9.9598	20.7229	1	12	1	4	4	45	41	40	15	1535	92	131	112	88	139	115	23	69	54	49	86	72	9
14139	0	0	0	0	0	0	0	0	0	0	0	0	0	0	3	2	34	4	2	1	1	2	0	0	14.8576	21.7514	0	-2	1	4	4	39	27	39	15	5480	83	128	103	93	149	122	33	71	60	53	91	79	16
14146	0	1	0	0	0	0	0	0	0	0	0	0	0	0	4	1	80	3	2	1	1	3	0	0	1.6077	9.7194	0	5	2	5	3	47	36	41	9	1015	67	105	84	71	134	95	38	84	52	49	105	63	12
14150	1	1	0	0	0	0	0	0	0	0	0	0	0	0	5	1	68	3	4	1	1	2	1	0	11.0304	86.9028	1	6	1	3	2	55	34	38	15	1590	67	98	74	85	154	122	36	71	60	52	95	82	10
14164	0	0	0	0	0	0	0	0	0	0	0	0	0	0	4	1	76	3	2	1	1	2	0	0	28.174	27.9701	1	6	1	3	2	51	43	43	15	620	49	66	56	104	181	134	41	64	47	60	103	76	11
14176	0	0	0	0	0	0	0	0	0	0	0	0	0	0	4	2	53	3	4	1	1	1	0	0	10.7285	30.0264	1	3	1	9	4	57	36	38	15	3290	104	122	113	77	141	98	48	74	59	59	96	73	5
14177	0	0	0	0	0	0	0	1	0	0	0	0	0	0	4	2	78	3	4	1	1	3	0	0	3.4126	3.3757	1	12	1	3	4	54	49	48	14	2056	74	128	92	94	141	115	43	73	60	57	88	73	20
14184	0	0	0	0	0	0	0	0	0	0	0	0	0	0	4	1	78	3	#NULL!	1	1	2	0	0	9.9756	16.1431	1	0	1	4	2	20	24	24	15	1065	68	106	84	100	149	118	44	63	50	66	91	76	6
14191	0	1	0	0	0	0	0	1	0	0	0	0	0	1	4	2	67	4	#NULL!	1	1	3	1	0	22.0054	29.8243	1	27	1	16	4	93	76	55	15	66	95	133	108	50	220	102	20	127	63	50	136	77	12
14193	0	0	0	0	0	0	0	0	0	0	0	0	0	0	4	2	52	4	2	1	1	1	0	0	0.7838	3.2813	1	5	1	2	3	52	21	23	14	1150	72	105	86	90	152	127	42	68	55	58	96	79	12
14197	0	0	0	0	0	0	0	1	0	0	0	0	0	0	4	2	56	4	2	1	1	3	0	0	5.5993	12.6299	0	10	1	3	2	31	19	31	14	3200	73	89	81	117	161	130	40	73	51	67	100	77	17
14203	0	1	0	0	0	0	0	0	0	0	0	0	0	0	4	2	80	3	2	1	1	3	0	0	2.2286	5.9299	1	6	2	6	3	70	51	51	7	1406	76	99	87	77	159	113	37	93	60	46	104	72	3
14205	0	0	0	0	0	0	0	1	0	0	0	0	0	0	4	1	59	4	4	1	1	3	0	0	10.884	20.9861	1	21	1	6	4	73	46	39	15	101	73	115	95	85	155	110	40	83	58	56	107	76	15
14207	0	1	0	0	0	0	0	0	0	0	0	0	0	0	5	2	73	3	2	1	1	1	1	1	0.688	0.5569	1	16	1	11	4	121	75	57	15	70	30	119	106	37	149	87	34	72	55	30	94	64	5
14217	0	1	0	0	0	0	0	0	0	0	0	0	0	0	4	2	78	4	#NULL!	1	1	3	0	0	2.2948	6.1285	0	7	1	3	3	29	25	38	15	1400	72	95	81	113	160	133	39	78	58	65	105	83	12
14227	0	0	0	0	0	0	0	0	0	0	0	0	0	0	4	2	51	3	2	1	1	1	0	0	2.7955	8.7639	0	0	1	2	3	30	36	23	15	1107	76	107	87	143	161	150	79	106	93	103	122	113	16
14248	0	1	0	0	0	0	0	0	0	0	0	0	0	1	2	2	59	2	2	1	1	3	1	1	2.1926	2.0083	1	26	1	11	4	121	69	44	15	564	89	104	95	115	166	142	60	84	70	7	109	89	18
14249	0	0	0	0	0	0	0	0	0	0	0	0	0	0	5	2	60	4	2	1	1	2	1	1	97.2972	97.2674	1	6	1	9	4	59	48	36	15	1650	69	132	98	82	151	112	46	73	60	64	96	78	14
14256	0	0	0	0	0	0	0	0	0	0	0	0	0	0	4	1	28	2	4	4	1	3	0	0	2.1297	3.0201	0	-3	1	2	3	38	11	32	13	2520	74	102	88	106	155	129	55	81	68	51	94	80	16
14268	0	0	0	0	0	0	0	0	0	0	0	0	0	0	3	1	54	2	4	1	1	3	0	0	3.0613	11.1715	0	16	2	10	3	75	46	48	11	413	83	115	95	81	143	110	35	86	57	50	105	75	12
14294	0	0	0	0	0	0	0	0	0	0	0	0	0	0	4	2	48	4	1	1	1	1	0	0	3.0611	22.1549	0	0	1	4	3	26	24	21	15	2576	86	112	99	83	136	109	47	69	59	59	83	73	12
14302	0	0	0	0	0	0	0	0	0	0	0	0	0	0	4	2	55	1	4	1	1	3	1	0	7.9288	15.1625	1	12	1	6	4	34	42	38	15	3095	97	135	109	94	180	131	45	108	77	61	128	95	16
14311	0	0	0	0	0	0	0	0	0	0	0	0	0	0	5	1	72	3	2	1	1	3	0	0	3.0295	5.0299	0	3	1	7	4	68	35	36	14	2430	94	116	104	91	176	144	31	71	59	51	100	85	22
14313	0	0	0	0	0	0	0	1	0	0	0	0	0	0	2	2	67	3	4	1	1	3	0	0	0.877	4.6326	1	0	1	3	1	38	33	25	15	750	69	87	76	141	184	166	50	87	73	86	119	104	17
14316	0	0	0	0	0	0	0	0	0	0	0	0	0	0	4	2	44	2	4	1	1	3	0	0	0.995	3.0361	1	11	1	5	2	35	20	19	15	3030	55	87	70	94	143	107	39	96	53	60	104	71	10
14319	0	1	0	0	0	0	0	0	0	0	0	0	0	0	2	2	63	3	3	1	1	1	0	0	2.813	6.6056	1	5	2	8	2	62	40	34	7	1510	61	79	70	100	190	115	57	169	72	72	175	82	14
14320	0	0	0	0	0	0	0	0	0	0	0	0	0	0	4	1	21	4	4	1	1	1	0	0	4.4869	11.5229	0	0	1	4	4	42	18	40	11	3080	82	128	102	103	179	150	34	99	72	56	123	95	12
14328	0	1	0	0	0	0	0	1	0	0	0	0	0	0	4	2	63	3	2	1	1	3	0	0	8.4092	11.2431	1	15	1	10	3	62	47	31	15	3745	72	113	90	88	153	121	43	86	61	56	100	79	18
14347	0	0	0	1	1	0	0	1	0	0	0	0	0	0	4	2	71	3	2	1	1	3	0	0	5.9568	13.616	1	23	1	3	2	17	32	30	15	2400	69	99	85	106	175	143	69	101	83	81	126	103	13
14373	0	0	0	0	0	0	0	0	0	0	0	0	0	0	4	2	35	4	4	1	1	3	0	0	4.7441	7.6965	0	8	1	4	4	38	19	30	13	2530	68	116	110	112	143	129	52	74	64	68	89	79	18
14398	0	1	0	0	0	0	0	0	0	0	0	0	0	0	2	2	73	3	#NULL!	1	1	1	0	0	1.714	4.6778	1	5	1	2	3	36	32	27	15	1605	87	118	97	110	166	139	52	77	63	79	102	88	19
14402	0	0	0	0	0	0	0	0	0	0	0	0	0	0	3	1	44	4	2	1	1	3	0	0	3.7646	3.6917	0	0	1	3	3	34	28	32	12	6485	72	120	84	114	173	142	55	97	73	65	109	90	16
14419	0	0	0	0	0	0	0	1	0	0	0	0	0	0	5	1	43	3	4	1	1	3	0	0	7.0299	14.1625	1	4	1	5	2	44	34	27	15	3155	56	93	67	92	130	104	46	73	57	66	95	74	18
14432	0	1	0	0	0	0	0	0	0	0	0	0	0	0	1	1	40	4	2	1	1	3	0	0	1.9444	7.1563	1	5	1	4	3	45	37	23	14	3665	94	125	111	92	119	102	48	76	62	64	90	76	16
14434	0	0	0	0	0	0	0	0	0	0	0	0	0	0	4	2	39	1	4	1	1	1	0	0	2.9668	8.6597	0	0	1	2	2	37	19	36	15	2115	70	94	80	98	153	120	55	81	67	39	112	83	12
14436	0	0	0	0	0	0	0	0	0	0	0	0	0	0	4	1	74	3	4	1	1	1	0	0	1.2523	44.5146	0	5	1	2	3	27	33	28	14	735	70	102	86	88	118	102	41	87	53	60	97	69	13
14440	0	0	0	0	0	0	0	0	0	0	0	0	0	0	2	2	19	4	4	1	1	2	0	0	1.6601	1.6507	0	3	1	7	4	55	33	39	15	3700	106	167	126	95	158	132	30	87	60	55	108	81	15
14465	0	0	0	0	0	0	0	0	0	0	0	0	0	0	3	1	44	4	2	1	1	1	0	0	3.1876	20.6236	1	-7	1	3	4	37	29	36	14	4430	84	107	95	88	156	108	50	89	59	60	127	78	9
14467	0	0	0	0	0	0	0	0	0	0	0	0	0	0	4	1	49	4	2	1	1	1	0	0	6.998	24.5993	0	0	2	7	4	65	41	43	9	1545	90	109	102	83	143	113	28	91	56	12	94	69	19
14475	0	0	0	0	0	0	0	1	0	0	0	0	0	0	4	1	78	3	#NULL!	3	1	3	0	0	1.8301	3.8778	1	19	1	3	1	25	30	37	15	1107	63	88	73	100	156	128	50	77	64	63	97	79	17
14478	0	0	0	0	0	0	0	0	0	0	0	0	0	0	4	2	69	3	1	2	1	3	0	0	1.2935	2.9597	0	6	1	4	2	61	43	28	14	1935	50	75	61	89	188	125	38	105	54	51	110	71	9
14492	0	0	0	0	0	0	0	0	0	0	0	0	0	0	4	1	27	2	4	1	1	3	0	0	3.6221	89.3563	0	-1	1	5	3	38	24	34	15	4574	93	113	100	93	140	107	52	96	69	66	114	81	17
14497	0	1	0	0	0	0	0	0	0	0	0	0	0	1	4	2	31	4	2	1	1	3	1	1	2.8687	4.1319	1	14	1	10	3	80	42	35	15	767	112	160	135	102	172	137	44	99	76	71	118	96	12
14516	0	0	0	0	0	0	0	0	0	0	0	0	0	0	4	1	50	4	2	1	1	3	0	0	3.1064	25.0063	1	5	1	5	4	32	31	17	15	5200	77	110	89	86	114	98	51	70	58	64	84	71	11
14520	0	0	0	0	0	0	0	1	0	0	0	0	0	0	2	1	50	3	2	2	1	3	0	0	2.2736	9.2472	0	16	1	6	2	36	19	26	14	#NULL!	76	93	83	105	172	148	76	118	93	86	127	106	19
14531	0	0	0	0	0	0	0	0	0	0	0	0	0	0	2	2	54	3	4	1	1	3	0	0	2.0598	2.8035	0	5	1	4	4	75	33	36	6	2450	108	122	114	105	144	136	45	87	74	51	97	87	10
14533	0	1	0	0	0	0	0	0	0	0	0	0	0	0	4	1	39	3	4	1	1	3	1	1	12.2661	12.0611	1	11	1	17	3	105	70	46	15	114	63	82	70	69	138	100	28	82	55	46	106	70	20
14545	0	0	0	0	0	0	0	0	0	0	0	0	0	0	3	1	27	1	4	1	1	2	0	0	2.5181	7.3861	0	0	2	3	4	32	19	27	11	2270	74	112	88	92	115	107	37	64	51	61	83	71	16
14553	0	0	0	0	0	0	0	0	0	0	0	0	0	0	4	1	40	4	4	1	1	2	0	0	1.8556	3.7799	0	0	1	2	2	36	18	26	14	3325	80	109	95	76	162	131	51	98	75	67	184	96	10
14558	0	0	0	0	0	0	0	0	0	0	0	0	0	0	2	2	51	4	2	1	1	2	0	0	5.9417	17.9417	0	-3	1	2	4	31	20	31	15	3380	97	116	106	102	143	123	45	86	71	72	101	88	14
14567	0	0	0	0	0	0	0	0	0	0	0	0	0	0	4	2	59	4	2	2	1	1	0	0	1.1914	4.0535	0	6	1	2	4	28	22	27	11	#NULL!	64	96	79	106	136	121	57	93	73	75	104	89	13
14577	1	0	1	0	0	0	0	0	0	0	0	0	0	0	4	1	79	3	#NULL!	1	1	2	0	0	4.1881	9.191	1	17	2	4	4	28	46	50	12	4700	88	117	102	97	163	129	54	83	69	70	116	92	4
14579	0	0	0	0	0	0	0	1	0	0	0	0	0	0	4	2	65	4	2	1	1	3	0	0	1.9786	11.9285	1	12	1	2	2	39	27	20	15	2080	59	99	74	95	154	125	33	76	49	56	96	75	12
14587	0	0	0	0	0	0	1	0	0	0	0	0	0	0	4	1	46	4	2	1	1	1	0	0	2.0056	2.8785	0	5	1	4	0	33	24	22	9	2195	55	79	65	102	154	126	47	83	64	65	109	85	6
14597	0	0	0	0	0	0	0	0	0	0	0	0	0	0	4	2	54	2	4	2	1	3	0	0	2.3481	6.6771	1	28	1	4	2	24	15	22	14	2850	63	97	77	108	154	133	39	80	63	62	101	86	14
14611	0	1	0	0	0	0	0	0	0	0	0	0	0	0	4	1	49	4	4	2	1	2	0	0	2.3343	9.2917	0	7	1	8	4	54	37	19	15	3128	69	109	87	66	173	108	34	68	50	52	104	69	16
14624	1	1	0	0	0	0	0	1	0	0	0	0	0	0	4	2	72	3	2	1	1	3	1	0	2.0431	48.091	1	13	1	4	4	49	45	43	11	920	86	116	99	110	166	141	36	87	59	67	100	86	12
14634	0	1	0	0	0	0	0	0	0	0	0	0	0	0	4	1	37	4	3	1	1	3	0	0	1.2724	7.6889	0	5	1	8	3	43	31	28	14	#NULL!	66	114	96	88	137	111	56	104	74	68	112	88	10
14641	0	1	0	0	0	0	0	0	0	0	0	0	0	0	4	1	42	3	#NULL!	1	1	3	1	1	10.5418	9.6403	1	5	1	14	4	88	48	43	15	876	72	109	92	76	161	120	42	85	65	52	115	85	14
14646	0	0	0	0	0	0	0	0	0	0	0	0	0	0	4	2	40	2	4	1	1	3	0	0	6.2093	9.9569	1	5	1	3	3	23	29	32	15	3720	84	126	99	102	141	122	48	84	69	73	99	86	12
14654	0	0	0	0	0	0	0	0	0	0	0	0	0	0	4	1	49	3	4	1	1	1	0	0	1.8829	17.0118	0	3	1	4	2	50	25	26	15	1637	70	86	77	132	188	160	53	99	74	76	266	108	16
14662	0	1	0	0	0	0	0	0	0	0	0	0	0	0	4	1	39	4	2	1	1	3	0	0	2.4383	4.4604	0	0	1	4	3	36	19	19	15	1653	53	97	74	77	142	98	41	88	55	54	106	69	16
14664	0	0	0	0	0	0	0	0	0	0	0	0	0	0	4	1	45	2	1	1	1	3	0	0	4.9445	20.2514	0	14	2	11	2	76	46	37	10	1570	67	107	87	77	151	100	34	92	54	45	106	65	8
14669	0	0	0	0	0	0	0	0	0	0	0	0	0	0	4	1	40	3	2	2	1	3	0	0	2.5475	27.8153	1	11	1	5	3	48	14	21	15	1782	73	86	78	135	190	164	68	88	77	91	121	106	14
14672	0	0	0	0	0	0	0	0	0	0	0	0	0	0	4	2	46	4	2	1	1	3	0	0	39.6604	39.6611	0	5	1	6	4	47	40	37	14	4100	94	116	103	97	178	138	51	91	69	66	117	89	15
14676	0	0	1	0	0	0	0	1	0	0	0	0	0	0	5	2	79	3	2	1	1	3	1	0	16.2358	16.2403	1	17	1	7	3	60	56	48	8	1336	64	79	69	118	169	131	62	93	71	76	108	86	11
14691	0	0	0	0	0	0	0	0	0	0	0	0	0	0	4	1	47	4	2	1	1	2	0	0	14.1094	25.8944	0	0	1	5	4	44	29	32	15	2265	89	122	104	84	135	108	40	68	54	55	87	71	16
14699	0	0	0	0	0	0	0	0	0	0	0	0	0	0	4	2	19	2	4	1	1	2	0	0	5.5266	8.359	0	-7	1	10	4	74	38	35	15	4025	85	111	100	82	158	107	42	91	63	58	114	77	27
14705	1	0	0	0	0	0	0	1	0	0	0	0	0	0	4	2	78	3	2	1	1	1	0	0	1.2692	8.8486	1	13	1	3	3	68	35	29	15	2833	59	109	79	91	124	104	27	82	46	50	93	67	15
14713	1	0	0	0	0	0	0	0	0	0	0	0	0	0	4	1	79	3	2	1	1	1	0	0	1.6749	4.6319	1	7	1	3	2	65	41	42	14	619	60	83	68	76	191	156	32	67	50	15	109	83	9
14716	0	0	0	0	0	0	0	0	0	0	0	0	0	0	4	2	59	4	4	1	1	1	0	0	0.7037	8.7882	1	22	1	3	3	50	22	42	14	576	83	99	88	121	157	137	57	87	67	80	115	90	10
14723	1	0	0	0	0	0	0	1	0	0	0	0	0	0	4	2	54	3	4	1	1	2	1	0	11.95	34.5681	1	17	1	7	3	58	34	32	15	509	53	99	78	129	153	141	49	74	62	69	96	82	12
14741	0	0	0	0	0	0	0	0	0	0	0	0	0	0	4	1	55	3	2	2	1	3	0	0	15.7039	15.725	1	5	1	4	1	48	30	31	15	1904	83	94	87	84	141	105	43	87	61	60	95	74	9
14753	0	0	0	0	0	0	0	0	0	0	0	0	0	0	4	1	78	3	#NULL!	1	1	2	0	0	2.1148	5.5674	0	5	1	3	4	29	29	31	15	1045	56	101	74	104	144	128	36	63	52	64	94	79	17
14755	0	0	0	0	0	0	0	0	0	0	0	0	0	0	4	1	47	3	4	1	1	3	0	0	5.9179	13.9139	0	5	1	5	4	67	57	42	15	1005	76	116	96	92	158	108	52	77	60	38	270	82	18
14768	0	0	1	0	0	0	0	0	0	0	0	0	0	0	4	2	66	4	2	1	1	1	0	0	0.885	8.5674	1	10	1	7	4	54	36	31	14	640	71	105	81	111	160	128	34	64	47	58	92	70	12
14779	0	0	0	0	0	0	0	0	0	0	0	0	0	0	4	1	22	5	4	1	1	2	0	0	2.1636	15.4958	0	-2	1	3	4	35	14	39	12	2745	76	110	93	114	150	132	53	79	64	74	99	86	5
14793	0	1	0	0	0	0	0	1	0	0	0	0	0	0	4	2	32	1	#NULL!	1	1	3	0	0	38.1406	42.8764	0	20	1	6	3	54	19	35	14	1040	85	115	101	105	133	120	23	88	57	60	101	78	16
14797	0	0	0	0	0	0	0	0	0	0	0	0	0	0	4	2	69	3	2	1	1	3	0	0	14.8087	21.2208	0	20	1	5	4	46	38	24	15	4150	107	158	129	111	177	138	45	93	72	71	115	94	16
14798	0	0	0	0	0	0	0	0	0	0	0	0	0	0	3	1	49	2	4	1	1	3	1	0	5.2321	5.8035	1	4	1	2	3	40	50	31	15	807	55	91	79	99	141	121	61	82	70	77	107	91	16
14815	0	0	0	0	0	0	0	0	0	0	0	0	0	0	2	1	30	4	4	1	1	3	0	0	1.4234	8.2535	0	7	1	7	4	53	34	35	15	34	91	108	101	99	152	127	41	97	73	64	115	91	18
14816	0	0	0	0	0	0	0	0	0	0	0	0	0	0	4	2	77	4	2	1	1	2	1	0	6.7247	10.5882	1	5	1	8	4	51	51	36	15	3242	75	95	84	88	178	125	37	68	53	12	104	74	13
14818	1	0	0	0	0	0	0	1	0	0	0	0	0	0	3	2	72	3	2	1	1	3	1	1	4.9756	4.3194	1	32	2	13	4	125	64	41	7	1520	83	171	120	74	124	96	32	67	53	52	78	67	11
14824	0	0	0	0	0	0	0	1	0	0	0	0	0	0	5	1	72	3	2	1	1	3	0	0	13.3976	18.016	1	10	2	5	1	39	42	32	13	3805	59	86	70	97	140	123	15	98	51	48	103	75	10
14827	0	0	0	0	0	0	0	1	0	0	0	0	0	0	2	2	62	3	2	1	1	3	0	0	4.1362	8.034	1	10	1	3	4	57	32	42	10	670	79	118	93	101	150	123	65	91	78	74	131	92	9
14828	0	1	0	0	0	0	0	0	0	0	0	0	0	0	4	1	60	4	2	2	1	1	0	0	1.106	10.9264	1	6	1	6	3	46	30	20	15	3270	75	123	91	85	116	105	40	70	55	57	85	72	16
14838	0	0	0	0	0	0	0	0	0	0	0	0	0	0	4	1	54	4	4	1	1	3	0	0	1.9921	28.7208	1	17	1	2	4	31	29	31	15	1150	69	107	86	115	266	136	52	76	64	74	131	88	15
14840	0	1	0	0	0	0	0	1	0	0	0	0	0	0	4	1	80	3	2	1	1	3	1	1	2.0011	6.9236	1	3	2	11	4	78	55	39	9	1286	82	136	102	65	132	91	22	62	35	39	147	63	14
14844	0	0	0	0	0	0	0	0	0	0	0	0	0	0	4	2	43	2	1	1	1	1	0	0	0.5605	0.5611	1	0	1	2	3	41	23	29	14	1420	82	112	94	90	139	120	41	85	63	23	103	77	16
14845	0	1	0	0	0	0	0	1	0	0	0	0	0	0	4	2	42	3	4	1	1	3	0	0	1.5424	7.225	0	7	1	9	4	44	31	32	14	17225	101	160	120	71	133	103	27	89	62	43	256	93	8
14853	1	0	0	0	0	0	0	0	0	0	0	0	0	0	4	2	74	3	2	1	1	3	0	0	1.9776	5.7639	0	-2	1	7	2	41	31	24	15	1695	66	91	75	76	157	112	19	103	59	42	117	77	14
14855	0	0	0	0	0	0	0	0	0	0	0	0	0	0	4	2	62	4	2	1	1	3	0	0	17.7145	17.7	1	6	1	5	4	50	24	25	15	3550	82	106	95	101	152	127	32	96	63	56	114	84	11
14873	0	0	0	0	0	0	0	1	0	0	0	0	0	0	2	1	64	3	4	1	1	2	0	0	1.3856	6.0576	1	12	1	5	4	72	45	37	15	150	84	118	96	94	159	130	19	53	40	44	81	70	17
14879	0	0	0	0	0	0	0	0	0	0	0	0	0	0	4	2	73	3	4	1	1	3	0	0	2.7692	5.5854	1	9	1	6	3	63	51	39	15	596	60	88	72	83	128	102	40	65	50	57	88	68	17
14898	0	0	0	0	0	0	0	1	0	0	0	0	0	0	4	2	62	2	4	1	1	1	0	0	8.5293	18.1243	1	23	1	8	2	69	52	28	15	1648	62	100	76	82	172	128	39	71	56	50	106	74	14
14918	0	1	0	0	0	0	0	0	0	0	0	0	0	0	4	2	76	3	2	1	1	3	0	0	5.0497	7.1729	0	14	1	6	4	54	34	33	14	3055	92	112	102	107	157	129	21	90	64	61	102	86	18
14946	0	0	0	0	0	0	0	0	0	0	0	0	0	0	2	1	52	2	4	2	1	3	0	0	1.2846	3.1083	0	-2	1	2	2	37	13	29	15	1400	72	107	89	107	181	133	43	121	70	57	130	85	9
14947	0	0	0	0	0	0	0	0	0	0	0	0	0	0	4	2	64	4	2	1	1	3	1	1	15.8677	15.7875	1	16	1	9	3	49	37	37	15	1002	78	98	89	111	157	131	60	84	73	73	114	90	13
14953	0	1	0	0	0	0	0	0	0	0	0	0	0	0	4	1	51	4	2	1	1	3	0	0	2.9501	5.5243	0	5	1	4	4	49	33	24	15	1600	100	120	108	65	128	95	26	93	55	35	97	66	8
14958	0	0	0	0	0	0	0	0	0	0	0	0	0	0	3	1	66	3	#NULL!	1	1	3	0	0	5.5584	15.4014	1	6	1	4	4	90	43	47	11	1072	69	148	113	141	229	181	75	118	90	97	169	124	17
14962	1	0	0	0	0	0	0	0	0	0	0	0	0	0	4	1	80	3	#NULL!	1	1	3	0	0	1.9588	18.9021	1	22	1	4	3	71	53	40	15	400	100	158	124	82	120	94	28	70	46	49	87	62	12
14967	0	1	0	0	0	0	0	0	0	0	0	0	0	0	5	1	48	4	4	1	1	3	1	0	4.5001	17.1625	1	19	1	5	4	68	43	25	15	673	89	109	99	73	111	89	41	64	51	55	80	64	10
14972	0	0	0	0	0	0	0	0	0	0	0	0	0	0	5	2	22	1	4	1	1	3	0	0	6.8012	7.7215	0	3	1	2	4	28	13	16	12	3445	65	117	83	117	145	133	54	91	77	75	109	96	15
14975	0	1	0	0	0	0	0	0	0	0	0	0	0	0	4	2	79	3	2	2	1	3	0	0	7.1588	7.1597	1	11	1	13	3	70	60	46	15	592	51	70	57	92	129	116	36	53	46	52	78	67	18
14987	0	1	0	0	0	0	0	0	0	0	0	0	0	0	2	2	54	3	2	1	1	3	0	0	6.1555	21.159	1	19	1	7	4	56	27	25	15	3970	84	115	97	94	145	120	45	72	61	64	89	80	11
14990	0	1	0	0	0	0	0	0	0	0	0	0	0	1	4	1	63	2	1	2	1	3	1	1	1.6114	6.6368	1	20	2	13	4	84	67	31	9	672	85	121	97	63	150	104	30	67	46	43	97	67	13
14998	0	0	0	0	0	0	0	1	0	0	0	0	0	0	4	1	42	3	2	1	1	3	0	0	3.3094	12.7583	0	11	1	3	3	35	18	35	15	2910	74	95	82	95	123	112	47	74	65	69	90	80	22
15009	0	0	0	0	0	0	0	1	0	0	0	0	0	0	4	1	77	3	2	1	1	1	0	0	1.3486	5.9819	1	17	1	6	0	47	44	22	15	1505	51	68	59	97	183	140	31	118	47	56	134	78	14
15025	0	0	0	0	0	0	0	0	0	0	0	0	0	0	4	2	66	3	2	2	1	3	0	0	1.6333	3.7201	0	2	1	6	2	47	40	37	15	1070	60	101	73	91	121	107	36	61	51	52	75	64	7
15036	0	1	0	0	0	0	0	1	0	0	0	0	0	0	4	1	53	4	2	1	1	1	0	0	1.7965	34.7132	0	7	1	4	2	37	28	28	13	2210	61	90	71	106	150	124	38	65	50	62	91	74	15
15041	0	0	0	0	0	0	0	0	0	0	0	0	0	0	4	1	43	4	2	3	1	1	0	0	2.8575	8.0347	1	12	1	2	3	30	20	14	14	2095	80	121	98	114	153	132	70	93	80	80	107	91	13
15046	0	1	0	0	0	0	0	0	0	0	0	0	0	0	4	1	65	3	4	1	1	3	0	0	11.4313	11.2701	0	18	1	6	3	70	47	38	15	674	42	58	48	85	141	115	34	89	50	55	100	72	7
15054	1	1	0	0	0	0	0	0	0	0	0	0	0	0	4	1	56	1	2	1	1	2	0	0	14.1842	49.2625	1	5	1	5	3	45	39	29	15	696	71	89	82	84	114	99	52	62	57	63	80	71	14
15066	0	1	0	0	0	0	0	1	0	0	0	0	0	0	4	1	55	4	2	1	1	3	0	0	9.2996	19.9597	1	15	1	3	4	52	32	41	15	2010	97	129	108	105	153	127	51	78	63	68	104	84	24
15071	0	0	0	0	0	0	0	0	0	0	0	0	0	0	4	1	53	3	4	1	1	3	0	0	2.0377	3.3243	1	18	1	2	1	34	34	28	13	1780	83	109	98	75	118	94	32	68	46	47	85	62	10
15084	1	0	0	0	0	0	1	1	0	0	0	0	0	0	4	2	60	4	2	1	1	3	0	0	12.9141	24.1972	1	45	1	14	4	84	56	38	15	1360	92	155	119	84	140	105	43	70	56	55	90	70	20
15103	0	0	0	0	0	0	0	0	0	0	0	0	0	0	4	2	36	4	4	1	1	1	0	0	6.7731	20.4688	0	5	1	3	4	36	9	25	14	1479	101	130	114	98	147	114	53	97	66	68	115	82	16
15124	0	0	0	0	0	0	0	1	0	0	0	0	0	0	4	2	80	3	2	1	1	3	1	1	17.7306	18.2076	1	7	1	11	3	59	41	30	14	1963	83	105	94	86	146	107	33	66	51	52	92	70	6
15125	0	1	0	0	0	0	0	0	0	0	0	0	0	0	4	1	56	4	2	1	1	3	0	0	2.1661	12.9493	1	18	2	4	3	62	40	32	6	3695	94	107	101	90	156	105	24	81	58	49	77	66	13
15138	0	0	0	0	0	0	0	1	0	0	0	0	0	0	4	2	56	3	4	1	1	3	0	0	5.5808	8.384	1	23	1	3	4	49	40	40	9	2210	100	130	111	102	159	135	54	93	76	70	118	96	10
15185	1	0	0	0	0	0	0	0	0	0	0	0	0	0	4	2	74	3	2	2	1	3	1	1	2.3726	1.5382	1	16	1	5	3	68	56	48	15	1115	102	129	118	68	128	95	30	75	49	45	88	65	10
15208	0	0	0	0	0	0	0	0	0	0	0	0	0	0	1	2	77	4	2	1	1	3	0	0	3.652	6.4792	1	5	1	4	4	44	39	30	8	1297	59	91	71	122	182	142	45	65	55	73	94	82	11
15209	0	0	0	0	0	0	0	0	0	0	0	0	0	0	4	1	59	4	2	1	1	3	0	0	3.9375	6.7201	1	6	1	3	4	33	18	27	15	2260	74	110	93	70	127	98	27	89	46	41	102	64	12
15223	0	1	0	0	0	0	0	0	0	0	0	0	0	0	4	2	33	5	2	1	1	1	0	0	1.5686	3.4056	0	-7	1	4	4	55	16	30	15	2965	92	118	106	70	131	103	24	83	61	45	100	75	18
15227	0	0	0	0	0	0	0	1	0	0	0	0	0	0	4	1	58	4	2	1	1	3	0	0	3.8675	23.7118	1	29	1	6	3	41	24	28	14	703	60	77	70	83	114	96	40	63	49	54	79	64	12
15250	0	0	0	0	0	0	0	1	0	0	0	0	0	1	2	2	64	4	#NULL!	1	1	3	1	1	1.2918	1.2451	1	22	1	15	4	98	66	54	15	303	101	144	113	80	124	105	41	85	70	58	114	84	20
15251	0	0	0	0	0	0	0	0	0	0	0	0	0	0	4	1	69	3	#NULL!	1	1	3	1	0	1.2572	1.4549	1	10	1	3	3	54	36	31	15	1510	85	109	97	95	124	109	46	88	56	59	95	68	14
15255	0	0	0	0	0	0	0	0	0	0	0	0	0	0	4	2	52	2	2	1	1	3	0	0	1.4524	13.2778	1	12	1	4	3	20	31	21	15	4300	79	101	86	96	134	115	58	73	64	71	92	81	19
15265	0	0	0	0	0	0	0	0	0	0	0	0	0	0	4	2	44	3	4	1	1	1	0	0	11.9853	37.891	1	0	1	6	2	39	30	23	15	3151	77	87	81	101	144	118	44	57	49	62	81	70	14
15275	1	1	0	0	0	0	0	0	0	0	0	0	0	0	4	2	71	3	4	1	1	3	1	1	4.2442	4.1993	1	12	2	21	4	182	110	64	3	102	106	151	121	75	142	106	42	77	58	55	97	73	22
15277	0	0	0	0	0	0	0	0	0	0	0	0	0	0	5	2	56	5	#NULL!	1	1	1	1	1	10.168	10.0882	1	-1	2	7	4	62	47	47	7	2670	95	140	116	83	180	127	45	104	69	61	133	89	12
15298	1	0	0	0	0	0	0	1	0	0	0	0	0	0	4	1	72	3	2	1	1	3	0	0	15.7792	18.4542	0	24	1	2	3	55	38	32	15	2460	53	74	64	105	140	120	40	96	53	57	99	70	15
15309	1	0	0	0	0	0	0	1	0	0	0	0	0	0	4	1	79	2	#NULL!	1	1	3	0	0	0.8757	3.991	1	23	1	4	0	45	36	30	9	2515	56	73	64	83	167	131	35	89	46	56	115	74	12
15313	0	0	0	0	0	0	0	0	0	0	0	0	0	0	4	2	49	4	2	1	1	2	0	0	25.5518	37.5715	0	0	1	10	4	70	45	49	15	921	87	128	111	78	120	93	41	69	55	56	152	69	5
15322	0	0	0	0	0	0	0	0	0	0	0	0	0	0	4	2	80	3	4	1	1	2	0	0	1.0577	5.8778	1	21	2	3	4	50	42	40	13	1290	94	131	110	92	171	118	31	78	52	55	109	74	17
15328	1	0	0	0	0	0	0	0	0	0	0	0	0	0	4	1	77	3	2	1	1	3	1	0	2.1086	38.3972	1	15	1	5	1	35	39	29	15	1300	61	80	68	97	138	126	33	64	48	63	87	74	20
15333	0	0	0	0	0	0	0	1	0	0	0	0	0	0	4	1	79	3	4	2	1	3	0	0	9.8994	19.7722	0	15	1	9	4	73	63	38	15	6070	69	100	86	48	142	102	18	83	54	28	103	73	16
15337	0	0	0	0	0	0	0	0	0	0	0	0	0	0	4	2	54	4	2	1	1	1	0	0	2.0983	7.0729	0	15	1	7	2	44	42	30	15	999	81	104	94	96	166	139	52	86	75	65	111	97	8
15361	0	0	0	0	0	0	0	0	0	0	0	0	0	0	4	2	47	2	4	1	1	3	0	0	0.7487	8.8479	1	7	1	3	2	24	36	17	15	2025	86	99	91	115	122	119	64	84	71	82	96	87	17
15367	0	0	0	0	0	0	0	1	0	0	0	0	0	0	5	1	58	3	1	1	1	3	0	0	2.4871	2.5208	0	11	1	6	1	69	39	41	14	62	83	96	90	112	172	146	74	104	85	87	127	105	8
15380	1	0	0	0	0	0	0	1	0	0	0	0	0	0	4	1	73	3	4	1	1	3	0	0	1.3866	26.1792	1	13	1	2	3	55	35	26	15	1535	85	114	103	89	134	102	34	90	52	54	96	69	14
15383	1	0	0	0	0	0	0	1	0	0	0	0	0	0	4	2	56	3	2	1	1	2	0	0	0.9673	4.184	0	12	1	3	2	16	13	20	15	1515	75	90	82	106	153	126	44	87	63	68	107	81	10
15390	0	0	0	0	0	0	0	0	0	0	0	0	0	0	4	1	75	3	4	1	1	2	0	0	8.3814	14.5694	1	6	1	7	3	57	42	38	15	1995	82	115	98	103	154	130	49	76	61	67	134	87	17
15407	1	0	0	0	0	0	0	0	0	0	0	0	0	0	1	2	73	3	2	3	1	3	0	0	1.6035	22.4688	1	15	1	6	2	60	46	35	14	100	71	88	82	96	142	117	42	78	53	61	86	74	14
15438	0	0	0	0	0	0	0	0	0	0	0	0	0	0	5	2	54	1	2	1	1	3	0	0	2.8461	3.7917	0	3	1	5	3	45	34	47	7	1363	83	101	94	121	161	146	55	82	69	80	106	94	11
15441	1	1	0	0	0	0	0	0	0	0	0	0	0	0	4	1	30	3	4	2	1	1	1	1	12.0891	12.1215	1	19	1	11	4	78	39	39	15	502	108	140	122	56	133	89	28	77	53	37	92	65	16
15453	0	0	0	0	0	0	0	0	0	0	0	0	0	0	4	2	49	2	4	1	1	3	0	0	0.7128	5.4632	1	20	1	3	2	43	20	26	14	825	83	105	93	126	155	142	57	87	77	81	109	99	12
15454	0	1	1	0	0	0	0	1	0	0	0	0	0	0	4	2	80	3	4	1	1	3	0	0	2.0134	5.1194	1	34	1	4	4	65	52	39	15	1150	50	92	67	76	135	99	31	69	48	46	88	65	17
15464	0	0	0	0	0	0	0	0	0	0	0	0	0	0	5	1	79	3	2	1	1	3	0	0	2.7603	8.6514	1	11	2	5	3	70	49	36	10	909	81	106	94	88	170	130	28	77	51	45	110	76	16
15465	0	1	0	0	0	0	0	0	0	0	0	0	0	0	4	2	74	3	2	2	1	2	0	0	0.9713	2.4819	0	5	1	6	2	43	36	27	15	1320	67	85	72	91	125	107	42	60	53	56	75	66	12
15472	1	0	0	0	0	0	0	1	0	0	0	0	0	0	4	2	65	3	2	12	1	3	0	0	3.529	3.5167	1	20	2	9	4	30	59	42	13	#NULL!	56	96	78	67	189	122	40	116	61	50	133	82	19
15489	0	0	0	0	0	0	0	0	0	0	0	0	0	0	2	1	72	3	#NULL!	1	1	3	0	0	3.5691	6.8465	1	2	1	4	1	45	40	31	13	1297	65	88	75	109	177	150	57	90	73	72	108	92	11
15491	1	0	0	0	0	0	0	0	0	0	0	0	0	0	4	2	73	3	1	1	1	2	0	0	2.8254	8.5903	0	8	1	4	3	45	47	38	15	1987	84	129	107	75	134	98	43	76	58	56	95	71	12
15498	0	0	0	0	0	0	0	0	0	0	0	0	0	0	5	1	40	4	2	1	1	3	1	1	13.5887	18.0743	1	20	1	16	4	87	55	46	15	137	112	136	125	78	113	97	35	86	50	50	74	61	14
15503	0	0	0	0	0	0	0	0	0	0	0	0	0	0	4	2	69	3	4	1	1	3	0	0	2.2255	6.7722	1	11	1	6	4	58	32	28	14	3555	86	113	98	89	130	111	45	69	59	60	88	77	17
15524	1	1	0	0	0	0	0	0	0	0	0	0	0	0	4	1	48	3	1	1	1	3	1	0	10.1419	11.4306	1	23	1	12	3	79	38	31	15	1410	59	78	71	86	125	103	36	59	52	51	74	64	14
15537	0	0	0	0	0	0	0	0	0	0	0	0	0	0	4	2	57	4	4	1	1	1	0	0	1.8493	7.9681	0	11	1	9	4	61	43	40	14	566	74	91	80	109	167	140	64	93	82	82	123	104	18
15541	1	1	0	0	0	0	0	0	0	0	0	0	0	0	4	1	76	3	4	1	1	3	1	1	2.2716	2.2035	1	10	1	4	3	61	44	38	15	1550	66	130	100	79	129	97	47	89	65	58	105	77	14
15565	0	0	0	0	0	0	0	0	0	0	0	0	0	0	5	2	79	3	2	1	1	2	0	0	30.5692	30.5688	1	16	2	8	4	59	53	48	6	1700	70	107	86	82	157	120	39	72	53	53	95	74	10
15566	1	0	0	0	0	0	0	0	0	0	0	0	0	0	2	2	72	3	4	1	1	3	0	0	1.5936	10.6472	1	15	1	7	2	55	59	48	7	2980	70	96	79	137	173	149	57	95	72	84	110	97	14
15575	0	0	0	0	0	0	0	0	0	0	0	0	0	0	4	2	63	4	2	1	1	2	0	0	11.0869	27.4965	1	0	2	4	4	63	43	31	8	4407	89	130	110	98	205	149	49	142	78	65	161	102	22
15582	0	0	0	0	0	0	0	0	0	0	0	0	0	0	3	1	43	2	4	1	1	3	0	0	2.2615	3.1368	0	10	1	2	4	45	28	34	11	1882	91	120	106	110	137	125	65	89	76	76	101	87	8
15590	0	1	0	0	0	0	0	0	0	0	0	0	0	0	4	1	55	3	#NULL!	1	1	3	0	0	17.7948	18.4708	1	7	1	8	3	81	39	46	15	1220	78	142	98	41	174	89	19	123	53	26	137	66	18
15607	0	0	0	0	0	0	0	0	0	0	0	0	0	0	4	2	52	3	4	1	1	2	0	0	5.0608	17.8625	0	5	1	2	3	29	34	47	14	2235	95	127	110	91	139	114	46	83	67	61	96	82	4
15626	1	0	0	0	0	0	0	1	0	0	0	0	0	0	1	1	65	3	2	1	1	3	1	0	2.2648	3.7819	1	30	1	9	4	83	50	37	15	1410	94	115	107	73	131	104	33	68	50	48	91	68	5
15644	0	1	0	0	0	0	0	0	0	0	0	0	0	0	3	1	50	1	2	1	1	2	0	0	6.7666	13.5646	1	1	1	5	4	16	24	33	15	2530	58	93	78	108	140	119	50	72	59	68	96	79	14
15645	0	1	0	0	0	0	0	0	0	0	0	0	0	1	4	2	56	4	2	2	1	3	1	1	0.2847	0.2208	1	26	1	17	4	124	76	50	15	0	61	106	98	33	133	59	13	89	33	21	93	38	22
15654	0	0	0	0	0	0	0	1	0	0	0	0	0	0	2	1	62	3	1	2	1	3	0	0	3.0061	6.8333	1	21	1	8	3	68	34	29	14	#NULL!	71	97	81	64	126	102	27	69	48	39	84	66	11
15656	0	0	0	0	0	0	0	0	0	0	0	0	0	0	4	1	66	3	2	1	1	3	1	1	4.8164	4.8125	1	14	1	12	4	87	52	41	15	87	91	105	98	87	118	101	26	60	46	47	70	60	21
15666	0	0	0	0	0	0	0	0	0	0	0	0	0	0	4	1	41	1	4	1	1	3	0	0	0.7492	2.6097	0	1	2	2	3	31	29	39	13	1662	92	119	107	90	131	103	50	81	62	64	98	76	12
15667	0	0	0	0	0	0	0	0	0	0	0	0	0	0	4	2	75	3	2	1	1	2	0	0	0.8091	7.4958	1	3	1	3	2	38	33	30	14	1885	81	95	88	120	170	144	51	77	62	76	104	89	16
15668	0	0	0	0	0	0	0	1	0	0	0	0	0	0	4	1	77	3	2	1	1	3	0	0	0.4319	0.4299	1	19	1	7	3	34	51	48	14	225	84	103	95	111	148	137	35	50	45	60	82	76	19
15704	0	1	0	0	0	0	0	0	0	0	0	0	0	0	4	2	65	3	2	2	1	3	0	0	27.1633	35.8243	0	5	1	5	4	76	42	30	9	2950	93	128	102	141	169	155	74	99	83	85	112	99	26
15706	0	0	0	0	0	0	1	0	0	0	0	0	0	0	4	1	61	4	2	1	1	1	0	0	11.9212	24.2208	0	19	2	6	4	39	43	29	11	875	65	93	79	97	146	122	51	76	61	67	97	82	15
15716	0	0	0	0	0	0	0	1	0	0	0	1	0	0	2	1	69	3	4	1	1	2	0	0	53.8568	57.9292	1	7	2	5	3	65	39	44	11	1597	88	131	106	94	211	142	44	105	69	67	145	96	16
15726	0	0	0	0	0	0	0	0	0	0	0	0	0	0	4	2	44	4	2	1	1	1	0	0	3.2907	10.1354	0	11	1	4	3	65	49	41	15	654	100	120	107	96	121	104	57	80	66	73	95	81	12
15728	0	1	0	0	0	0	0	0	0	0	0	0	0	0	4	1	50	4	2	1	1	3	0	0	6.4531	26.7681	0	3	1	10	2	57	38	30	15	1560	72	103	82	81	148	111	43	79	62	56	122	80	12
15733	0	0	0	0	0	0	0	0	0	0	0	0	0	0	4	1	55	4	2	2	1	3	0	0	11.814	13.725	0	4	2	7	3	72	44	51	6	3525	77	103	89	71	150	118	35	89	70	48	132	89	14
15737	1	0	0	0	0	0	0	1	0	0	0	0	0	0	4	1	65	4	2	1	1	1	0	0	26.7013	26.6979	0	14	1	6	3	59	46	47	15	975	63	91	77	90	187	139	48	72	59	33	106	78	5
15741	0	0	0	0	0	0	0	0	0	0	0	0	0	0	4	1	49	4	2	1	1	2	0	0	1.001	4.8083	0	0	1	5	4	19	27	32	15	3895	72	92	79	86	140	106	46	80	58	62	182	78	12
15747	1	1	0	0	0	0	0	1	0	0	0	0	0	0	1	2	71	1	2	1	1	3	1	1	3.1774	22.8424	1	12	1	13	3	86	70	43	14	1042	95	140	107	71	149	96	33	99	57	46	116	72	12
15749	1	1	0	0	0	0	0	1	0	0	0	0	0	0	4	1	62	3	2	4	1	3	0	0	8.9362	14.8382	1	16	2	9	4	58	57	47	12	2827	78	132	99	68	122	101	29	109	58	46	111	70	15
15754	0	0	0	0	0	0	0	0	0	0	0	0	0	0	4	1	49	4	2	1	1	3	0	0	17.1707	21.0313	1	8	1	3	3	34	27	31	15	1230	47	93	68	104	161	128	56	94	72	71	132	91	13
15761	0	0	0	0	0	0	0	0	0	0	0	0	0	0	5	2	65	3	#NULL!	1	1	3	1	1	3.8659	6.6236	1	9	1	6	4	68	43	29	14	2755	108	131	115	84	124	106	34	78	57	52	93	74	10
15769	0	0	0	0	0	0	0	0	0	0	0	0	0	0	4	1	66	3	#NULL!	2	1	1	0	0	13.0606	20.9194	1	9	1	5	4	51	37	39	15	#NULL!	97	117	109	85	111	95	36	52	46	54	72	62	22
15776	0	0	0	0	0	0	0	0	0	0	0	0	0	0	2	2	34	1	4	1	1	1	0	0	5.8081	18.7493	0	5	1	9	3	60	39	34	15	3330	83	111	93	111	194	145	61	83	71	77	114	95	12
15784	1	0	0	0	0	0	0	1	0	0	0	0	0	0	4	2	80	3	2	3	1	3	0	0	1.469	3.5819	1	26	1	6	2	36	33	28	14	4550	73	95	82	94	133	113	36	57	46	60	82	68	13
15794	0	0	0	0	0	0	0	0	0	0	0	0	0	0	2	2	68	3	2	1	1	3	1	1	14.1012	13.1021	1	22	1	8	3	86	58	45	3	1353	60	97	71	103	188	153	52	83	67	68	120	94	12
15811	0	0	0	0	0	0	0	0	0	0	0	0	0	0	4	2	48	3	#NULL!	1	1	1	1	1	6.22	9.3569	1	16	1	11	4	77	60	41	15	2047	97	151	120	68	189	140	30	100	72	43	130	95	15
15812	0	1	0	0	0	0	0	0	0	0	0	0	0	0	4	1	38	4	4	2	1	1	1	1	29.3336	44.0486	1	14	1	7	2	57	22	26	15	1815	118	134	126	122	148	134	56	84	67	78	103	90	24
15815	0	0	0	0	0	0	0	0	0	0	0	0	0	0	4	2	65	4	2	1	1	1	0	0	0.7867	8.1701	0	0	1	4	4	52	17	18	14	1695	84	114	94	90	184	128	45	74	56	52	108	77	13
15838	0	0	0	0	0	0	0	0	0	0	0	0	0	0	4	1	77	3	2	1	1	3	0	0	5.1764	8.0125	1	0	2	3	3	55	44	28	12	1610	80	100	91	89	137	115	38	78	52	57	94	73	7
15861	0	0	0	0	0	0	0	0	0	0	0	0	0	0	4	2	49	4	2	1	1	3	0	0	2.3933	3.9465	1	0	1	2	3	31	22	28	14	1150	74	107	91	109	144	120	56	72	64	78	92	82	9
15869	0	0	0	0	0	0	0	0	0	0	0	0	0	0	4	2	44	3	4	1	1	1	0	0	2.2991	6.2701	0	0	1	2	3	42	30	36	15	2925	103	124	114	91	135	107	48	83	63	60	100	77	14
15872	0	0	0	0	0	0	0	0	0	0	0	0	0	0	2	2	40	4	4	1	1	3	0	0	2.5392	8.0021	0	0	1	4	4	39	6	14	15	1950	70	96	82	121	182	147	46	79	67	66	97	84	11
15876	0	0	0	0	0	0	0	1	0	0	0	0	0	0	4	1	72	3	#NULL!	1	1	3	0	0	5.2035	5.2042	1	17	1	6	3	61	53	43	15	650	40	77	63	91	146	121	34	94	51	52	109	72	7
15877	0	0	0	0	0	0	0	1	0	0	0	0	0	0	4	2	77	3	2	1	1	3	0	0	19.9254	37.2146	0	7	2	5	3	45	38	32	12	1515	88	127	102	98	176	117	56	119	73	69	130	90	18
15886	0	0	0	0	0	0	0	1	0	0	0	0	0	0	4	1	58	2	#NULL!	1	1	3	0	0	13.3891	16.2021	0	10	1	9	3	54	40	39	15	3040	70	95	80	65	125	97	34	71	56	15	136	66	10
15887	0	0	0	0	0	0	0	0	0	0	0	0	0	0	4	2	49	4	2	1	1	3	0	0	1.4632	5.6208	1	14	1	5	1	36	24	22	15	1000	53	70	60	91	124	106	46	66	58	62	85	74	10
15891	0	0	0	0	0	0	0	0	0	0	0	0	0	0	4	2	80	3	2	1	1	1	0	0	1.6825	15.4806	1	6	2	5	3	59	46	32	8	1884	57	85	66	86	191	134	45	92	62	60	132	88	12
15900	0	1	0	0	0	0	0	0	0	0	0	0	0	0	4	1	47	2	#NULL!	1	1	3	1	1	1.1199	1.1528	1	9	1	12	3	104	56	44	15	117	75	124	106	87	150	107	46	81	56	59	111	75	12
15918	1	0	0	0	0	0	0	0	0	0	0	0	0	0	4	1	52	2	3	1	1	1	0	0	3.6196	7.5035	0	7	1	3	3	30	31	31	15	3185	61	97	75	89	202	128	34	109	64	12	149	87	10
15919	0	0	0	0	0	0	0	0	0	0	0	0	0	0	2	2	40	3	4	1	1	3	0	0	4.6951	9.7382	1	5	2	4	2	74	26	42	11	1060	72	88	81	97	158	131	31	113	65	57	124	87	13
15922	0	0	0	0	0	0	0	0	0	0	0	0	0	0	3	2	44	3	4	1	1	1	0	0	1.4636	14.691	0	19	1	8	2	43	36	17	14	2785	68	88	78	96	122	105	43	69	56	63	89	75	11
15923	0	0	0	0	0	0	0	0	0	0	0	0	0	0	4	2	64	4	#NULL!	1	1	3	0	0	1.9052	6.134	0	0	1	7	4	38	35	40	12	2495	78	103	86	101	151	120	43	77	57	62	99	78	11
15928	0	0	0	0	0	0	0	1	0	0	0	0	0	0	4	2	40	3	4	1	1	3	0	0	0.9494	9.1431	0	27	1	5	4	40	35	20	15	3810	93	123	109	80	161	116	48	97	64	59	120	81	16
15930	0	0	0	0	0	0	0	1	0	0	0	0	0	0	5	1	76	3	#NULL!	2	1	3	0	0	1.0487	6.6125	0	12	1	2	2	38	33	26	14	2655	82	110	93	145	201	174	48	122	71	76	143	97	15
15933	0	0	0	0	0	0	0	0	0	0	0	0	0	0	5	2	46	3	4	1	1	2	0	0	1.6899	2.85	0	0	1	2	2	29	29	29	15	4500	60	95	79	87	210	139	44	92	68	60	138	94	8
15944	0	0	0	0	0	0	0	0	0	0	0	0	0	0	5	2	62	4	2	1	1	3	0	0	1.3946	4.4715	0	-3	1	4	2	34	31	28	14	800	75	104	85	89	146	121	51	73	59	64	95	79	#NULL!
15945	0	0	0	0	0	0	0	0	0	0	0	0	0	0	1	1	67	2	2	1	1	2	0	0	1.2649	26.7583	1	11	1	2	3	22	31	18	15	5500	96	125	107	117	159	136	52	83	64	75	108	88	14
15952	0	0	0	0	0	0	0	0	0	0	0	0	0	0	4	1	49	4	2	1	1	3	0	0	15.0785	69.209	1	6	1	13	4	114	79	49	15	169	111	154	128	65	140	91	28	97	60	45	110	70	10
15963	1	0	0	0	0	0	0	1	0	0	0	0	0	0	4	2	66	3	2	1	1	3	1	1	1.6374	1.9007	1	28	1	11	3	91	67	56	14	661	54	131	100	38	121	96	13	90	61	22	231	87	14
15970	0	0	0	0	0	0	0	0	0	0	0	0	0	0	4	2	51	2	1	1	1	3	0	0	0.7822	3.75	0	18	1	3	3	70	35	28	14	1330	79	104	90	93	133	110	31	62	44	54	107	68	11
15976	0	0	0	0	0	0	0	0	0	0	0	0	0	0	4	1	78	3	2	1	1	1	0	0	6.0147	17.7354	0	3	1	4	3	39	49	37	15	3870	67	133	110	75	151	119	39	67	54	52	94	75	15
15998	0	0	0	0	0	0	0	0	0	0	0	0	0	0	4	2	67	3	1	1	1	3	0	0	1.6719	3.6597	0	5	1	5	4	48	33	35	6	3970	67	99	82	106	167	138	37	97	67	60	119	90	16
16011	0	0	0	0	0	0	0	0	0	0	0	0	0	0	4	2	50	4	2	1	1	2	0	0	1.8513	4.3639	0	0	1	4	4	44	32	22	15	3119	66	128	81	65	129	98	38	72	57	56	89	73	12
16012	0	0	0	0	0	0	0	0	0	0	0	0	0	0	5	1	79	3	#NULL!	1	1	1	0	0	1.0736	5.0208	0	7	1	2	1	33	29	31	14	1445	55	89	68	81	172	121	22	97	56	45	115	77	14
16020	1	0	0	0	0	0	0	1	0	0	0	0	0	0	4	1	75	3	2	1	1	1	0	0	22.9072	23.5653	1	17	1	3	2	37	32	35	15	1760	63	99	77	102	159	121	36	76	54	16	105	74	16
16022	0	0	0	0	0	0	0	0	0	0	0	0	0	0	4	2	67	4	2	2	1	3	0	0	3.9869	12.0285	0	17	1	6	1	64	39	30	15	993	46	58	52	89	120	102	28	63	38	50	77	60	12
16040	0	0	0	0	0	0	0	0	0	0	0	0	0	0	4	1	41	3	4	1	1	1	0	0	1.6369	14.684	0	7	1	2	2	49	26	24	15	900	61	120	76	85	112	95	29	58	46	50	66	57	6
16045	1	0	0	0	0	0	0	1	0	0	0	0	0	0	4	2	66	4	2	1	1	1	0	0	4.6562	7.5722	1	27	1	5	2	40	54	31	15	2920	38	81	59	86	201	149	33	98	67	57	122	95	6
16053	0	1	0	0	0	0	0	1	0	0	0	0	0	0	4	2	65	3	2	11	1	3	0	0	5.9447	7.809	1	11	1	3	3	45	46	39	15	1370	52	84	67	68	116	97	40	63	53	47	79	68	14
16061	0	0	0	0	0	0	0	1	0	0	0	0	0	0	4	1	76	3	2	1	1	3	0	0	1.9001	10.9819	1	7	2	4	4	45	49	40	10	1834	54	107	75	81	189	126	23	79	48	42	112	74	11
16063	0	0	0	0	0	0	0	0	0	0	0	0	0	0	4	2	60	2	4	1	1	3	0	0	1.1772	2.1528	0	14	1	3	2	27	36	21	15	3525	71	92	80	108	161	130	57	99	72	76	120	91	10
16073	0	0	0	0	0	0	0	0	0	0	0	0	0	0	4	2	48	3	2	1	1	2	1	1	1.9955	2.609	1	0	1	11	3	98	66	40	15	442	89	157	118	59	146	104	37	97	64	23	114	75	17
16080	0	0	0	0	0	0	0	0	0	0	0	0	0	0	4	1	52	4	2	1	1	3	0	0	1.7142	3.6104	1	18	1	5	2	31	31	38	14	1812	98	120	106	95	140	123	56	75	64	70	96	84	14
16085	0	0	0	0	0	0	0	0	0	0	0	0	0	0	4	2	43	3	2	1	1	3	0	0	7.0048	36.2576	0	13	1	6	4	70	27	42	14	1495	83	142	99	101	143	126	47	80	64	63	88	78	16
16087	0	0	0	0	0	0	0	0	0	0	0	0	0	0	4	1	74	3	2	1	1	2	0	0	2.5442	29.8889	0	0	1	4	4	52	45	35	14	727	72	107	88	116	181	148	47	87	63	74	126	94	13
16091	0	1	0	0	0	0	0	1	0	0	0	0	0	0	4	2	49	3	4	1	1	3	1	1	0.987	0.8194	1	28	1	13	4	118	67	53	14	0	45	162	81	39	194	96	12	84	37	31	123	53	7
16141	0	0	0	0	0	0	0	0	0	0	0	0	0	0	4	2	44	4	2	1	1	3	1	0	1.9686	3.5611	1	20	1	8	2	61	43	32	14	295	110	130	119	109	146	132	65	103	81	78	107	93	14
16150	0	1	0	0	0	0	0	0	0	0	0	0	0	0	4	1	63	4	#NULL!	1	1	3	1	1	1.3177	1.6556	1	17	1	12	4	81	68	40	15	571	73	99	84	77	131	96	47	68	53	58	294	74	15
16156	1	0	0	0	0	0	0	1	0	0	0	0	0	0	4	2	68	3	2	1	1	1	0	0	17.8159	26.9757	0	18	1	4	4	65	39	43	15	1192	76	141	95	96	167	125	36	73	58	60	106	80	10
16160	0	0	0	0	0	0	0	0	0	0	0	0	0	0	4	2	48	2	#NULL!	1	1	3	0	0	0.9685	2.875	1	-10	1	3	1	39	38	20	15	4395	75	92	83	90	108	99	40	56	49	58	71	66	12
16162	0	0	0	0	0	0	0	0	0	0	0	0	0	0	4	1	41	3	4	1	1	2	0	0	2.8183	5.7799	0	2	1	4	4	29	24	19	15	2720	110	137	123	88	133	114	52	75	62	64	94	78	7
16164	1	0	0	0	0	0	0	1	0	0	0	1	0	0	4	2	76	3	4	2	1	1	0	0	4.6186	21.4236	1	28	1	5	3	54	30	33	14	1325	67	96	76	104	179	149	42	94	71	56	110	90	9
16177	0	0	0	0	0	0	0	1	0	0	0	0	0	0	5	1	64	2	#NULL!	1	1	3	0	0	4.82	4.8208	1	9	1	5	3	30	34	38	14	1540	54	84	70	91	165	123	38	86	62	59	182	87	12
16179	0	0	0	0	0	0	0	0	0	0	0	0	0	0	4	1	64	4	4	1	1	3	0	0	1.8687	7.3313	1	9	1	4	4	40	30	32	14	995	74	93	82	75	125	96	29	68	42	45	81	60	11
16186	0	0	0	0	0	0	0	0	0	0	0	0	0	0	4	2	65	3	2	4	1	1	0	0	4.9607	6.9153	1	18	1	6	2	59	42	32	15	975	53	78	68	123	178	151	33	69	55	67	103	87	18
16194	0	1	0	0	0	0	0	0	0	0	0	0	0	0	4	1	70	3	#NULL!	1	1	3	0	0	3.5677	5.2194	1	10	1	5	2	65	44	24	15	971	76	89	82	49	120	93	10	61	49	23	81	63	14
16207	0	0	0	0	0	0	0	0	0	0	0	0	0	0	4	2	48	2	4	1	1	1	0	0	0.8722	3.6861	1	18	1	3	3	54	26	34	15	1400	94	117	104	116	182	152	72	105	89	91	130	111	12
16216	0	0	0	0	0	0	0	0	0	0	0	0	0	0	4	2	77	3	#NULL!	1	1	3	0	0	3.0699	4.916	1	8	2	5	3	63	42	34	9	1670	51	84	66	82	135	105	41	62	49	53	78	62	19
16236	0	0	0	0	0	0	1	1	0	0	0	0	0	0	4	1	63	4	2	3	1	3	1	1	11.224	11.1618	1	12	1	8	3	73	47	44	15	583	89	114	95	80	127	102	42	102	54	56	110	70	8
16240	0	1	0	0	0	0	0	0	0	0	0	0	0	1	4	1	31	4	2	1	1	3	0	0	5.5568	5.5389	1	20	1	4	4	42	30	32	15	3050	101	128	118	128	148	136	62	82	75	83	95	89	16
16258	1	0	0	0	0	0	0	0	0	0	0	0	0	0	4	1	69	3	2	1	1	3	0	0	1.9816	9.1486	1	13	1	4	3	49	39	24	15	5435	103	129	113	77	130	101	33	99	54	51	109	69	12
16264	0	1	0	0	0	0	0	1	0	0	0	0	0	0	4	2	70	4	2	1	1	3	0	0	9.2364	10.1167	1	26	1	5	4	65	51	39	15	3890	91	136	110	95	178	128	24	97	51	54	112	77	21
16271	0	0	0	0	0	0	0	0	0	0	0	0	0	0	4	1	67	3	2	1	1	1	0	0	7.9242	10.7035	1	13	1	3	3	29	35	38	15	2538	78	126	97	81	191	145	34	82	59	53	119	81	6
16278	0	0	0	0	0	0	0	1	0	0	0	0	0	0	2	2	75	3	1	1	1	3	0	0	1.0423	4.9965	1	5	1	5	2	61	38	33	14	258	76	87	80	118	167	145	60	104	79	82	125	101	17
16293	1	0	0	0	0	0	0	1	0	0	0	0	0	0	4	2	75	3	2	1	1	2	0	0	3.2994	11.2132	1	12	1	4	4	36	42	40	15	1135	75	94	84	130	173	150	68	96	80	93	129	109	15
16298	0	0	0	0	0	0	0	0	0	0	0	0	0	0	4	2	73	3	2	1	1	2	0	0	2.3977	11.3472	0	5	1	5	2	31	32	29	15	2400	57	88	76	111	188	147	36	66	50	60	106	80	13
16310	0	0	0	0	0	0	0	0	0	0	0	0	0	0	4	1	77	3	#NULL!	1	1	1	0	0	3.8047	13.7569	0	0	2	3	1	28	36	27	13	1960	52	65	60	98	138	119	42	77	51	61	97	74	14
16317	0	0	0	0	0	0	0	0	0	0	0	0	0	0	5	1	53	4	4	1	1	2	0	0	9.7459	16.0174	0	0	1	3	4	26	33	28	15	3705	105	134	118	88	146	110	44	74	59	62	100	77	10
16365	0	1	0	0	0	0	0	0	0	0	0	0	0	0	4	1	58	4	2	1	1	3	0	0	27.2498	57.9	1	26	1	6	4	58	27	30	14	1375	84	116	101	83	108	97	45	68	53	57	77	63	18
16367	0	1	0	0	0	0	0	0	0	0	0	0	0	0	4	1	54	4	2	1	1	3	0	0	8.4112	20.3271	0	5	1	6	4	66	18	33	14	1075	80	114	94	97	145	115	40	93	56	59	110	76	16
16370	0	0	0	0	0	0	0	1	0	0	0	0	0	0	4	2	60	4	2	1	1	3	0	0	5.4685	12.1583	1	24	1	12	3	98	84	49	15	219	99	139	107	68	131	89	34	82	53	44	89	65	21
16375	0	1	1	0	0	0	0	0	0	0	0	0	0	0	1	2	58	3	4	1	1	3	0	0	5.2262	4.7146	1	17	1	6	4	61	53	38	15	4140	84	128	97	67	164	108	42	91	72	48	103	80	19
16378	0	0	0	0	0	0	0	0	0	0	0	0	0	0	1	2	47	4	2	1	1	1	0	0	1.3524	7.5514	0	11	1	4	3	26	24	25	15	2089	81	112	95	108	138	125	59	88	66	73	96	86	10
16379	0	1	0	0	0	0	0	1	0	0	0	0	0	0	4	2	43	2	#NULL!	1	1	3	0	0	4.0575	11.9875	0	26	1	7	4	86	34	36	14	2240	62	122	98	87	147	108	44	75	57	56	97	72	14
16382	0	1	0	0	0	0	0	0	0	0	0	0	0	0	4	1	78	3	#NULL!	1	1	3	0	0	1.1805	6.0521	1	11	1	6	3	62	53	35	15	0	65	82	74	88	127	109	19	50	35	47	76	60	17
16384	0	1	0	0	0	0	0	0	0	0	0	0	0	0	4	1	38	2	4	1	1	3	0	0	11.2896	15.7965	0	6	2	13	3	77	56	43	8	825	68	130	101	76	121	98	40	78	60	52	95	75	16
16406	0	0	0	0	0	0	0	0	0	0	0	0	0	0	2	2	60	3	2	1	1	3	0	0	2.1716	3.0313	1	10	1	5	3	58	30	24	15	#NULL!	80	102	88	81	137	99	30	62	44	47	83	62	7
16439	0	0	0	0	0	0	0	0	0	0	0	0	0	0	4	1	59	3	#NULL!	1	1	1	0	0	4.8987	11.8646	1	15	2	9	4	62	42	43	8	1166	51	92	65	79	136	113	33	60	41	47	88	64	14
16446	1	0	0	0	0	0	0	1	0	0	0	0	0	0	2	1	69	3	4	2	1	3	0	0	1.417	12.866	1	19	1	2	2	35	23	29	15	1089	75	95	84	73	142	104	50	84	64	56	104	76	17
16454	0	0	0	0	0	0	0	0	0	0	0	0	0	0	4	2	49	3	1	1	1	3	0	0	0.7212	24.7674	1	0	1	2	3	37	23	19	15	1605	72	101	87	97	124	110	58	77	65	71	91	80	9
16465	0	0	0	0	0	0	0	1	0	0	0	0	0	0	4	1	47	4	2	1	1	3	0	0	1.0144	10.7847	0	17	1	3	2	43	30	19	15	720	64	92	77	113	156	135	39	76	55	68	103	82	8
16468	0	0	0	0	0	0	0	0	0	0	0	0	0	0	2	2	48	3	#NULL!	1	1	1	0	0	12.7344	18.8278	0	-2	1	9	3	59	39	32	15	1307	72	103	90	126	211	170	60	92	74	81	132	106	17
16487	1	0	0	0	0	0	0	0	0	0	0	0	0	0	2	1	75	3	1	1	1	3	0	0	23.7829	26.7333	1	11	1	6	4	63	58	50	15	1020	62	127	99	68	158	120	30	81	57	49	109	79	5
16488	0	1	0	0	0	0	0	0	0	0	0	0	0	0	2	2	73	3	4	1	1	3	0	0	0.9019	8.7257	0	8	1	6	4	33	28	28	14	3720	64	108	75	99	161	118	51	95	62	68	117	80	12
16490	0	1	0	0	0	0	0	1	0	0	0	0	0	0	4	1	73	3	2	2	1	3	0	0	1.1664	5.9979	1	15	1	4	3	59	32	37	15	221	71	85	76	118	178	153	14	71	35	59	100	75	16
16492	1	0	0	0	0	0	0	1	0	0	0	0	0	0	4	1	69	3	1	5	1	3	0	0	2.143	7.1	0	17	1	6	3	39	43	47	14	665	77	109	88	93	130	112	50	103	66	60	107	77	17
16493	0	0	0	0	0	0	0	1	0	0	0	0	0	0	4	2	63	3	2	1	1	3	0	0	1.6013	6.6667	1	17	1	4	0	42	35	19	15	2095	52	75	58	102	205	160	43	74	62	63	117	94	10
16522	0	0	0	0	0	0	0	0	0	0	0	0	0	0	4	2	51	4	2	1	1	1	0	0	12.1037	35.6972	0	0	1	5	1	30	32	30	15	2270	54	90	71	120	190	149	58	88	70	56	116	91	10
16523	1	0	0	0	0	0	0	1	0	0	0	0	0	0	5	2	58	4	2	1	1	3	1	1	4.7259	35.0868	1	12	1	5	4	45	28	35	14	3325	89	114	102	89	132	103	38	81	54	56	92	70	24
16531	0	0	0	0	0	0	0	1	0	0	0	0	0	0	4	1	65	3	2	2	1	3	0	0	1.8753	10.8188	1	10	1	3	3	55	31	33	15	1065	76	103	88	84	139	113	19	85	51	54	98	72	17
16534	0	1	0	0	0	0	0	0	0	0	0	0	0	0	4	2	45	4	4	1	1	3	0	0	2.1054	2.075	0	11	1	7	3	42	22	20	15	5170	75	103	93	83	114	98	39	85	61	54	89	73	16
16542	0	0	0	0	0	0	0	0	0	0	0	0	0	0	4	2	79	3	4	1	1	3	0	0	1.1013	5.7951	1	9	1	5	3	47	53	24	15	3330	66	91	78	110	158	130	44	63	54	68	92	80	17
16543	1	0	0	0	0	0	0	0	0	0	0	0	0	0	4	2	73	3	2	1	1	3	0	0	2.5561	4.5486	0	5	1	3	3	34	28	30	14	3300	67	83	73	87	119	100	38	80	53	58	87	69	12
16554	0	0	0	0	0	0	0	1	0	0	0	0	0	0	4	1	50	2	4	1	1	3	0	0	2.9198	6.4826	0	3	1	4	3	34	18	24	14	1480	72	100	85	95	182	122	42	103	69	55	116	82	15
16565	1	0	0	0	0	0	0	0	0	0	0	0	0	0	4	2	79	3	2	1	1	3	1	0	1.8457	10.5056	1	11	1	5	4	60	57	55	15	662	76	112	92	58	141	89	19	63	41	32	86	58	12
16571	0	0	0	0	0	0	0	0	0	0	0	0	0	0	1	2	72	4	2	1	1	2	0	0	2.1377	9.8097	0	5	1	3	1	38	38	26	10	1830	43	60	52	94	138	123	49	60	53	62	85	75	14
16575	0	1	0	0	0	0	0	0	0	0	0	0	0	0	4	1	62	5	4	1	1	1	0	0	6.1162	31.6451	0	11	1	2	3	33	37	29	14	1019	72	108	92	56	124	103	43	76	62	51	90	75	13
16577	0	0	0	0	0	0	0	0	0	0	0	0	0	0	2	1	76	3	2	1	1	1	0	0	2.341	9.2368	1	15	1	6	1	44	52	30	14	960	52	87	62	94	156	123	42	71	55	59	99	78	14
16590	0	0	0	0	0	0	0	0	0	0	0	0	0	0	4	2	44	4	4	2	1	2	0	0	8.9234	12.9021	0	15	1	4	2	49	48	42	7	890	62	97	80	99	155	128	63	86	75	79	107	92	11
16595	0	0	0	0	0	0	0	0	0	0	0	0	0	0	4	1	60	4	2	1	1	3	0	0	10.8209	25.8007	0	-2	1	5	4	43	32	40	15	1854	87	115	100	92	155	108	27	82	52	57	101	70	9
16600	0	0	0	0	0	0	0	0	0	0	0	0	0	0	4	1	64	3	4	1	1	1	0	0	10.7065	10.7701	1	11	2	7	4	68	59	45	6	923	52	102	80	79	128	103	41	75	56	54	91	73	13
16601	0	0	0	0	0	0	0	0	0	0	0	0	0	0	4	1	50	4	2	1	1	2	0	0	3.9036	6.3611	0	11	1	2	4	38	19	35	14	3510	91	140	113	87	136	101	42	72	51	58	93	68	3
16605	0	1	0	0	0	0	0	0	0	0	0	0	0	0	4	2	61	3	2	1	1	1	0	0	0.8253	4.8056	1	17	1	4	2	46	47	22	15	2250	67	99	80	86	125	100	39	60	48	55	82	65	15
16612	0	0	0	0	0	0	0	1	0	0	0	0	0	0	5	1	29	2	4	1	1	3	0	0	6.9871	10.5708	0	12	1	2	1	24	6	17	14	2550	74	90	81	102	130	116	34	57	48	57	81	71	20
16635	0	0	0	0	0	0	0	0	0	0	0	0	0	0	5	2	55	4	2	1	1	2	0	0	2.0759	11.5132	0	-7	1	3	3	26	13	22	14	3605	77	111	98	139	179	154	74	102	84	98	121	108	13
16650	0	0	0	0	0	0	0	0	0	0	0	0	0	0	4	2	60	1	4	1	1	2	0	0	0.886	2.7764	0	-3	1	2	2	25	18	22	15	1550	84	97	91	104	146	121	45	83	61	67	102	81	16
16676	0	0	0	0	0	0	0	1	0	0	0	0	0	0	4	2	70	3	2	1	1	3	0	0	2.0458	17.5993	1	26	1	4	2	71	45	28	8	1765	96	125	115	131	171	148	66	101	78	92	118	101	10
16680	1	1	0	0	0	0	0	1	0	0	0	0	0	0	2	1	74	3	2	5	1	1	1	1	1.8078	6.2674	1	24	2	11	4	89	55	45	11	#NULL!	55	164	99	50	159	110	29	87	53	44	103	72	12
16682	0	0	0	0	0	0	0	0	0	0	0	0	0	0	4	1	56	2	2	1	1	3	0	0	6.6188	14.5653	0	13	1	8	1	67	39	41	15	167	43	56	49	106	168	143	43	84	71	59	100	89	12
16687	1	0	0	0	0	0	0	0	0	0	0	0	0	0	4	2	59	4	2	1	1	3	0	0	0.9237	11.8757	1	10	1	3	3	43	25	22	15	4400	85	128	95	96	158	124	53	82	67	68	98	86	16
16690	0	0	0	0	0	0	0	0	0	0	0	0	0	0	5	2	60	4	2	1	1	3	0	0	8.9929	17.9056	0	3	1	4	4	38	45	38	15	1630	91	120	107	97	153	123	53	85	61	64	104	79	16
16691	0	1	0	0	0	0	0	0	0	0	0	0	0	1	5	2	29	5	4	1	1	3	1	1	18.5965	18.491	1	14	1	15	4	107	67	54	15	103	91	139	115	66	136	96	29	72	51	47	87	67	12
16693	0	0	0	0	0	0	0	0	0	0	0	0	0	0	4	1	66	3	2	1	1	3	0	0	1.2851	16.8576	1	5	1	6	3	50	35	25	14	1610	88	109	95	85	140	103	34	77	51	54	98	69	16
16722	1	0	0	0	0	0	0	1	0	0	0	0	0	0	5	1	77	3	#NULL!	1	1	3	0	0	4.2805	22.0021	1	14	1	4	3	53	41	31	12	1695	79	146	98	117	168	143	42	83	60	68	104	88	15
16727	0	0	0	0	0	0	0	0	0	0	0	0	0	0	4	1	62	3	#NULL!	2	1	3	0	0	1.7833	2.6847	1	20	1	10	2	46	51	39	8	813	74	102	87	119	171	137	38	64	49	65	98	78	15
16731	0	0	0	0	0	0	0	0	0	0	0	0	0	0	4	2	52	4	2	1	1	1	0	0	1.1802	5.2083	1	4	1	4	1	18	9	10	14	2295	63	73	68	150	192	179	75	87	82	102	123	116	10
16737	0	0	0	0	0	0	0	0	0	0	0	0	0	0	4	2	43	2	4	1	1	2	0	0	1.021	25.5424	0	0	1	2	4	25	13	22	15	3010	94	115	104	119	160	135	57	93	70	78	115	92	8
16755	0	0	0	0	0	0	0	1	0	0	0	0	0	0	4	1	63	3	2	2	1	3	0	0	1.8056	5.8542	1	12	1	9	3	68	40	46	14	0	61	88	75	107	149	129	42	67	52	60	83	71	9
16756	0	0	0	0	0	0	0	0	0	0	0	0	0	0	5	1	52	4	2	1	1	3	0	0	0.7602	4.9271	0	0	1	2	2	38	22	27	12	2670	68	129	102	115	150	133	50	74	62	77	93	85	13
16757	0	0	0	0	0	0	0	0	0	0	0	0	0	0	4	1	51	4	2	1	1	2	0	0	3.2248	4.7222	1	11	1	2	4	46	24	27	10	4055	80	128	104	103	166	134	62	105	80	76	125	98	12
16773	0	0	0	0	0	0	0	0	0	0	0	0	0	0	4	1	78	3	4	1	1	3	1	1	1.8249	1.7326	1	14	1	6	3	74	58	47	15	73	60	83	67	85	134	109	23	39	31	44	70	57	14
16786	0	0	0	0	0	0	0	0	0	0	0	0	0	0	4	1	40	4	2	4	1	3	0	0	2.03	23.9708	1	0	1	3	2	33	41	28	15	495	66	97	78	87	115	100	63	90	75	72	94	82	6
16794	1	0	0	0	0	0	0	0	0	0	0	0	0	0	1	1	75	3	2	1	1	3	0	0	2.7655	9.5215	0	2	1	5	4	72	52	39	15	4230	35	131	61	74	180	132	37	88	62	53	121	85	11
16802	0	1	0	0	0	0	0	0	0	0	0	0	0	0	4	1	45	4	2	1	1	3	0	0	4.7938	4.9688	0	3	1	2	3	37	19	24	15	1650	98	114	108	107	143	128	51	76	57	71	94	81	19
16809	0	0	0	0	0	0	0	0	0	0	0	0	0	0	4	2	77	3	#NULL!	1	1	3	0	0	1.6834	20.675	1	11	1	2	1	30	34	29	13	1815	76	113	86	86	140	127	41	93	69	56	107	88	16
16817	0	1	0	0	0	0	0	0	0	0	0	0	0	0	4	2	69	3	1	1	1	3	0	0	1.2972	3.3771	0	3	1	4	4	46	31	26	15	1925	68	99	80	92	127	107	34	62	47	53	78	67	18
16832	0	0	0	0	0	0	0	0	0	0	0	0	0	0	4	2	45	4	2	1	1	1	0	0	1.8339	7.8625	0	11	1	7	2	20	21	29	14	2169	74	96	83	123	161	147	77	103	92	97	127	114	10
16839	1	0	0	0	0	0	0	1	0	0	0	0	0	0	4	2	79	3	2	2	1	3	0	0	1.0047	10.8417	1	17	1	3	3	32	31	27	14	3150	71	95	81	131	169	148	68	98	80	91	120	103	16
16843	0	1	0	0	0	0	0	0	0	0	0	0	0	0	4	2	72	3	#NULL!	1	1	3	0	0	1.9881	9.8507	0	3	1	6	4	60	43	27	15	896	56	122	82	70	150	102	27	112	48	45	125	66	14
16847	0	0	0	0	0	0	0	0	0	0	0	0	0	0	4	1	40	4	2	1	1	3	0	0	7.6198	23.7715	1	25	1	7	2	42	27	22	14	1439	105	132	118	105	135	120	38	80	56	62	97	78	18
16849	0	1	0	0	0	0	0	0	0	0	0	0	0	0	4	1	70	3	2	1	1	3	0	0	0.9149	2.2472	0	5	1	3	2	35	40	25	14	3510	60	88	71	94	129	113	40	97	57	60	105	76	14
16850	0	0	0	0	0	0	0	0	0	0	0	0	0	0	4	1	66	3	1	1	1	3	0	0	1.8524	4.8924	1	8	1	3	3	19	23	32	15	3007	87	115	106	110	141	123	48	82	59	65	94	73	12
16855	1	1	0	0	0	0	0	0	0	0	0	0	0	0	2	2	55	3	4	1	1	3	1	0	2.2389	22.9389	1	22	1	7	4	53	48	43	15	#NULL!	94	138	115	55	175	106	35	87	63	44	114	77	8
16865	0	1	0	0	0	0	0	1	0	0	0	0	0	0	4	2	29	2	2	2	1	3	0	0	5.0742	7.9021	0	14	1	8	4	80	22	35	14	1880	91	114	103	81	149	109	28	103	51	50	116	70	12
16879	0	0	0	0	0	0	0	0	0	0	0	0	0	0	1	2	35	3	2	2	1	3	0	0	4.0355	23.1778	1	8	1	2	3	37	21	23	14	2945	70	97	87	81	125	94	42	72	60	53	80	67	22
16888	0	0	0	0	0	0	0	0	0	0	0	0	0	0	4	1	48	4	2	1	1	3	0	0	2.0826	6.1563	0	0	1	5	3	31	20	15	14	2107	68	98	78	76	149	115	30	78	60	47	100	78	14
16895	0	1	0	0	0	0	0	0	0	0	0	0	0	0	4	2	45	4	2	1	1	3	0	0	3.3397	6.0104	0	17	1	2	3	22	32	15	15	2100	63	94	75	84	106	95	49	68	55	61	80	69	14
16904	0	0	0	0	0	0	0	0	0	0	0	0	0	0	4	2	46	3	4	1	1	2	0	0	0.8719	0.7056	0	5	1	3	3	27	21	30	15	1696	58	98	77	102	163	135	45	116	67	65	132	88	10
16905	0	0	0	0	0	0	0	0	0	0	0	0	0	0	4	1	79	3	4	1	1	3	0	0	9.7885	9.7813	1	3	1	8	2	62	59	41	15	806	80	106	90	50	145	101	20	86	46	30	110	65	14
16911	0	0	0	1	0	0	0	0	0	0	0	0	0	0	4	1	73	3	2	2	1	3	0	0	1.1019	8.8458	1	6	1	3	4	40	37	36	14	980	90	106	95	103	164	146	63	96	76	74	109	92	16
16916	0	0	0	0	0	0	0	0	0	0	0	0	0	0	2	2	33	3	4	1	1	3	0	0	2.1377	5.1965	0	3	1	4	3	35	18	18	15	#NULL!	79	104	90	112	166	138	63	105	84	79	118	102	13
16929	0	1	0	0	0	0	0	0	0	0	0	0	0	0	5	1	56	4	2	1	1	3	1	1	15.4708	14.8938	1	3	1	6	1	36	31	42	14	1067	65	79	73	98	129	111	45	77	61	64	88	78	22
16947	0	0	0	0	0	0	0	1	0	0	0	0	0	0	4	2	79	3	2	1	1	3	0	0	13.3196	27.9472	1	16	2	4	3	55	56	42	11	1680	96	126	112	63	130	98	28	61	44	40	80	62	11
16949	0	0	0	0	0	0	0	0	0	0	0	0	0	0	4	2	52	4	2	1	1	3	0	0	2.5891	12.4903	1	5	1	7	4	68	38	31	13	1030	110	125	118	102	129	114	51	75	67	71	93	82	14
16954	0	0	0	0	0	0	0	0	0	0	0	0	0	0	4	2	23	4	4	1	1	2	0	0	1.7539	6.6396	0	0	1	4	4	28	18	24	15	2552	78	101	90	110	160	136	51	93	67	67	111	88	16
16964	0	1	0	0	0	0	0	1	0	0	0	0	0	0	4	1	70	3	#NULL!	1	1	1	0	0	3.5146	8.6646	0	12	1	7	4	49	50	32	15	961	79	106	94	77	177	111	37	87	56	53	123	76	12
16970	0	0	0	0	0	0	0	0	0	0	0	0	0	0	5	1	49	1	4	1	1	3	0	0	3.4037	12.8611	1	-2	1	4	3	58	41	30	15	412	79	105	93	85	129	102	40	58	50	55	81	67	16
16973	0	0	0	0	0	0	0	0	0	0	0	1	0	0	5	1	58	4	2	1	1	1	1	1	4.1059	4.0618	1	0	1	7	3	73	37	43	6	1832	77	96	85	105	159	128	40	68	54	55	105	75	12
16978	0	0	0	0	0	0	0	0	0	0	0	0	0	0	1	1	65	1	2	1	1	2	0	0	1.292	6.191	0	0	1	2	1	15	20	19	15	3210	58	74	68	104	137	115	44	64	57	65	86	77	14
17008	0	0	0	0	0	0	0	0	0	0	0	0	0	0	4	1	47	4	2	2	1	3	0	0	0.8425	5.8826	0	16	1	2	1	38	27	19	15	1200	58	82	71	91	129	109	28	85	60	52	90	73	10
17014	0	1	0	0	0	0	0	0	0	0	0	0	0	0	4	2	58	2	#NULL!	1	1	3	0	0	0.863	0.8396	0	7	1	5	1	27	19	24	14	1850	70	87	79	81	125	106	41	66	54	62	86	71	11
17021	1	1	0	0	0	0	0	0	0	0	0	0	0	0	4	1	79	3	#NULL!	2	1	3	1	0	1.1261	64.8868	1	15	1	2	4	50	34	36	15	1780	63	138	80	77	125	106	13	60	39	45	75	61	15
17045	0	0	0	0	0	0	0	0	0	0	0	0	0	0	3	2	30	4	4	1	1	2	0	0	0.9481	6.6778	0	0	1	7	4	33	19	49	14	5250	72	128	99	112	182	134	53	112	72	74	199	95	4
17047	0	1	0	0	0	0	0	0	0	0	0	0	0	0	4	2	24	4	4	1	1	3	0	0	4.5472	52.8875	1	5	1	6	4	58	32	26	15	6650	93	141	115	103	147	127	40	87	67	61	104	87	22
17052	0	0	0	0	0	0	0	0	0	0	0	0	0	0	4	1	33	3	2	1	1	1	0	0	5.6091	25.8132	0	5	2	7	4	50	30	34	12	2735	74	108	92	96	152	120	49	92	73	46	123	91	12
17059	0	0	0	0	0	0	0	0	0	0	0	0	0	0	4	2	74	3	2	1	1	1	0	0	0.8553	4.8333	1	11	1	4	2	44	27	26	15	1310	80	102	88	127	156	140	35	76	56	70	99	84	20
17068	0	0	0	0	0	0	0	0	0	0	0	0	0	0	4	1	68	3	#NULL!	1	1	2	0	0	23.1222	30.8813	1	0	1	10	3	56	62	45	15	472	98	126	115	79	132	98	48	92	60	63	98	74	7
17097	0	0	0	0	0	0	0	1	0	0	0	0	0	0	5	1	77	3	4	1	1	3	0	0	18.038	20.8306	0	12	1	5	4	47	39	36	15	1036	71	103	85	80	149	109	43	73	54	57	99	72	14
17107	0	1	0	0	0	0	0	1	0	0	0	0	0	0	4	2	63	4	2	1	1	3	0	0	1.1673	3.7257	1	8	1	2	2	26	20	25	15	1394	62	80	68	107	167	136	55	89	66	68	95	82	15
17113	0	0	0	0	0	0	0	0	0	0	0	0	0	0	2	1	37	4	2	1	1	3	0	0	3.5901	5.4993	0	11	1	6	4	66	29	30	15	1085	68	99	78	107	178	148	46	97	77	80	126	103	13
17130	0	0	0	0	0	0	0	0	0	0	0	0	0	0	4	2	56	4	3	1	1	3	0	0	1.3433	1.3132	0	20	1	4	4	24	27	27	13	5550	79	106	91	121	156	141	38	86	64	66	108	90	19
17134	0	0	0	0	0	0	0	0	0	0	0	0	0	0	4	1	65	3	2	1	1	3	0	0	8.8559	16.5465	0	8	1	8	4	91	51	55	14	106	95	116	107	78	151	112	36	83	64	49	103	78	14
17175	0	1	0	0	0	0	0	0	0	0	0	0	0	0	4	2	51	4	4	1	1	3	0	0	4.9964	29.6938	0	14	1	10	2	71	44	24	15	410	72	88	78	89	123	105	43	79	55	59	85	72	12
17181	1	1	0	0	0	0	0	0	0	0	0	0	0	0	4	1	76	3	2	2	1	3	0	0	3.1735	10.7826	0	19	1	5	1	43	40	21	14	2930	69	84	74	80	137	107	25	99	53	41	104	65	12
17184	0	0	0	0	0	0	0	0	0	0	0	0	0	0	4	1	65	3	4	1	1	3	0	0	1.749	5.3576	0	0	1	2	3	31	25	26	12	1560	72	96	85	109	145	129	57	75	65	76	102	90	10
17198	0	0	0	0	0	0	0	0	0	0	0	0	0	0	4	2	65	4	1	1	1	2	1	0	2.5566	14.0958	1	8	1	3	3	29	28	21	15	4845	76	89	82	132	175	160	51	71	62	78	103	92	16
17205	0	0	0	0	0	0	0	0	0	0	0	0	0	0	4	1	76	3	#NULL!	2	1	3	0	0	6.7602	6.7479	1	19	1	4	3	63	51	30	15	1488	59	77	67	100	160	125	41	58	50	62	92	76	12
17226	0	0	0	0	0	0	0	0	0	0	0	0	0	0	4	2	68	4	#NULL!	1	1	3	0	0	16.6618	23.5868	1	5	1	14	3	56	60	54	15	420	64	105	86	67	167	110	28	77	49	44	101	68	5
17230	0	0	0	0	0	0	0	0	0	0	0	0	0	0	4	2	69	3	4	1	1	1	0	0	1.588	12.6903	1	4	1	6	4	52	40	37	15	1043	69	100	84	84	139	106	40	72	51	57	93	71	13
17231	0	0	0	0	0	0	0	0	0	0	0	0	0	0	4	2	68	3	2	1	1	3	1	1	1.0149	4.1694	1	20	1	6	4	73	55	40	14	90	84	96	90	77	115	93	35	60	43	50	78	60	10
17236	1	0	0	0	0	0	0	0	0	0	0	0	0	0	4	2	77	3	2	1	1	3	0	0	7.7334	24.6257	1	14	2	3	4	80	52	36	13	860	75	142	106	83	185	125	32	100	63	49	125	84	6
17249	0	0	0	0	0	0	0	0	0	0	0	0	0	0	1	2	52	4	2	1	1	3	0	0	1.0441	12.0486	0	6	1	2	4	37	22	22	15	2275	63	153	91	72	143	97	40	74	53	54	99	68	17
17259	0	0	0	0	0	0	0	0	0	0	0	0	0	0	5	2	46	2	4	1	1	3	1	1	9.1478	8.1493	1	11	1	13	4	76	47	35	15	2268	83	111	99	94	140	109	45	67	54	61	88	72	19
[truncated: 5,529 more rows]
[truncated: 61 more columns]
